# Supplementary material for: Direct long-read RNA sequencing identifies a subset of questionable exitrons likely arising from reverse transcription artifacts
Source: Springer Nature journal article supplement (doi:10.1186/s13059-021-02411-1), 2021-06-28
Supplement: MOESM1 [file 13059_2021_2411_MOESM1_ESM.pdf]

## Direct long-read RNA sequencing identifies a subset of questionable exitrans likely arising from reverse transcription artifacts

Laura Schulz<sup>1\*</sup>, Manuel Torres-Diz<sup>2\*</sup>, Mariela Cortés-López<sup>1\*</sup>, Katharina E. Hayer<sup>3\*</sup>, Mukta Asnani<sup>2</sup>, Sarah K. Tasian<sup>4</sup>, Yoseph Barash<sup>5</sup>, Elena Sotillo<sup>2&</sup>, Kathi Zarnack<sup>6</sup>, Julian König<sup>1#</sup>, and Andrei Thomas-Tikhonenko<sup>2,7 #</sup>

<sup>1</sup> Institute of Molecular Biology (IMB), Ackermannweg 4, 55128 Mainz, Germany. <sup>2</sup> Division of Cancer Pathobiology, Children's Hospital of Philadelphia, Philadelphia, PA 19104, US. <sup>3</sup> The Bioinformatics Group, Children's Hospital of Philadelphia, Philadelphia, PA 19104, US. <sup>4</sup> Division of Oncology, Children's Hospital of Philadelphia, Philadelphia, PA 19104, US. <sup>5</sup> Department of Genetics, Perelman School of Medicine at the University of Pennsylvania, Philadelphia, PA 19104, US. <sup>6</sup> Buchmann Institute for Molecular Life Sciences (BMLS), Goethe University Frankfurt, Max-von-Laue-Str. 15, 60438 Frankfurt, Germany. <sup>7</sup> Department of Pathology & Laboratory Medicine, Perelman School of Medicine at the University of Pennsylvania, Philadelphia, PA 19104, US.

\* These authors contributed equally.

& Present address: Stanford Cancer Institute, 265 Campus Dr., Stanford, CA 94305

# Corresponding authors: Julian König ([j.koenig@imb-mainz.de](mailto:j.koenig@imb-mainz.de)) and Andrei Thomas-Tikhonenko ([andreit@pennmedicine.upenn.edu](mailto:andreit@pennmedicine.upenn.edu))

### SUPPLEMENTARY FIGURES

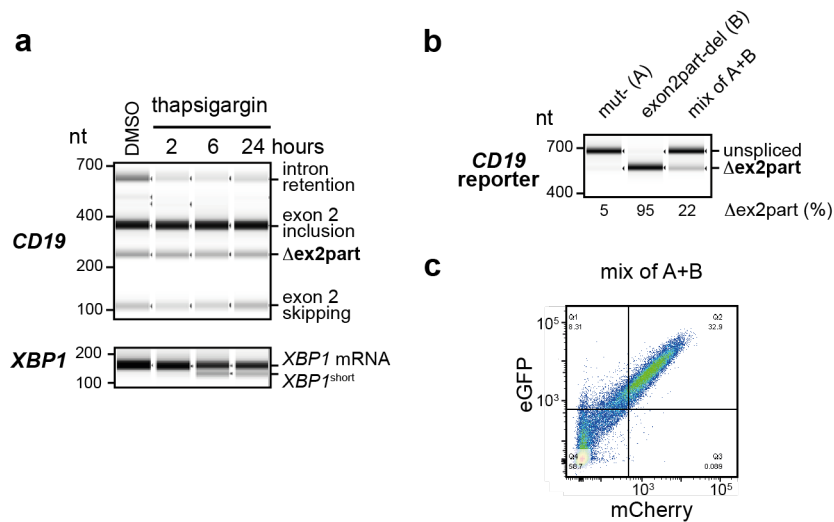

**Figure S1. Levels of the  $\Delta$ ex2part product are not affected by thapsigargin treatment.** **a)** RT-PCR experiments followed by capillary electrophoresis to quantify different *CD19* and *XBP1* isoforms. NALM-6 cells were treated with thapsigargin for indicated time intervals. **b)** RT-PCR experiments followed by capillary electrophoresis to quantify different *CD19* isoforms in HEK293T cells transfected with a mixture of mut- (A; does not produce  $\Delta$ ex2part band) and exon2part-del (B; the reported intron is removed at the DNA level) reporter constructs. **c)** Flow cytometry-based assay performed on the same cells.

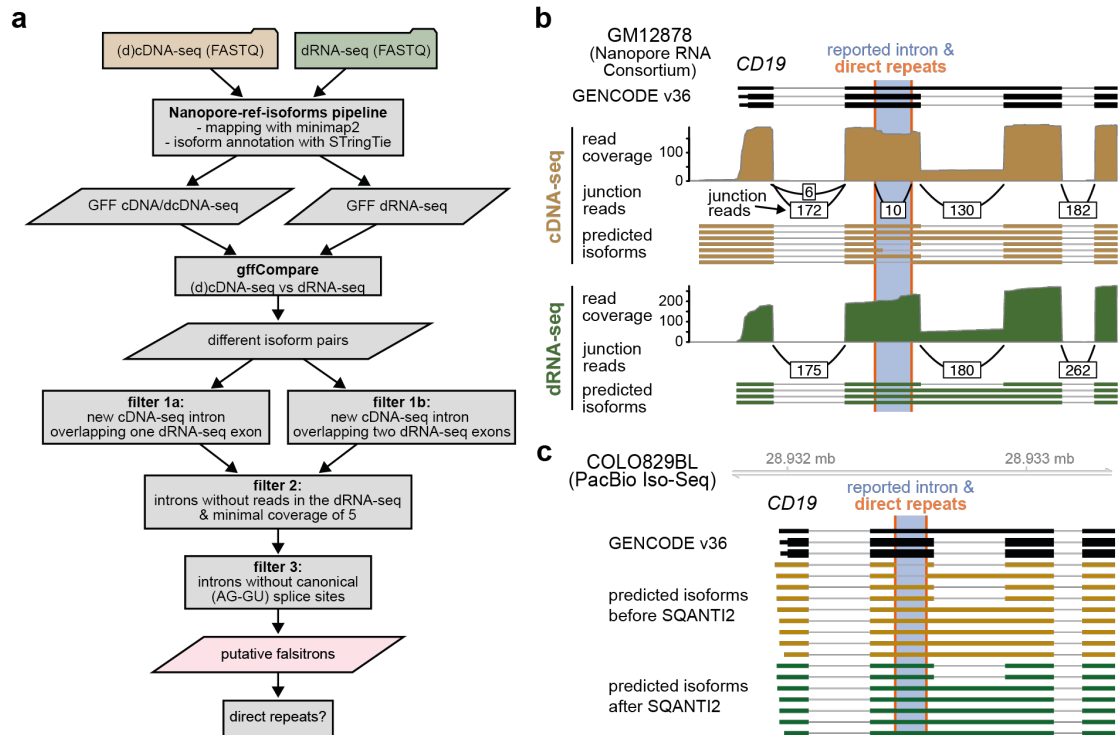

**Figure S2. The workflow to detect falsitrons captures the truncated *CD19*  $\Delta$ ex2part product. a)** Extended schematic representation of the workflow to identify questionable exitrons (dubbed “falsitrons”). **b)** Genome browser view depicting detection of the *CD19* falsitron ( $\Delta$ ex2part) in ONT cDNA-seq, but not dRNA-seq data from the Nanopore RNA Consortium. **c)** Genome browser view shows that the *CD19* falsitron ( $\Delta$ ex2part) is detected in PacBio Iso-Seq experiments but is filtered out when applying SQANTI2.
