# Supplementary material for: Direct long-read RNA sequencing identifies a subset of questionable exitrons likely arising from reverse transcription artifacts
Source: Springer Nature journal article supplement (doi:10.1186/s13059-021-02411-1), 2021-06-28
Supplement: MOESM2 [file 13059_2021_2411_MOESM2_ESM.pdf]

**Data 1. Putative falsitrons in the genomic context.** Genome browser view for 100 falsitron events that were detected in long-read ONT sequencing data produced by the Nanopore RNA Consortium and the Singapore Nanopore Expression Project (SG-NEx). For each event, the title provides the genomic coordinates (human genome version hg38), the gene symbol, the cell line in which the event was detected, and the direct repeat sequence if any. Each plot includes the following tracks: (i) reference transcript models (GENCODE v36), (ii) cDNA-seq read coverage (red), (iii) cDNA-seq sashimi plot of splice junctions, (iv) cDNA-seq transcript annotation (StringTie), (v) dRNA-seq read coverage (green), (vi) dRNA-seq sashimi plot of splice junctions, (vii) dRNA-seq transcript annotation (StringTie). The same tracks are also provided for dcDNA-seq (orange) if available. The position of the putative falsitron is highlighted in light red. For the sashimi plots, only junctions supported by a minimum of five reads are shown. Note that 11 events were detected in the comparison of both cDNA-seq and dcRNA-seq against dRNA-seq and are hence depicted on the same page.

chr1:28335161-28335708:+ MED18

Cell line: A549

Direct repeat sequence: CAGC

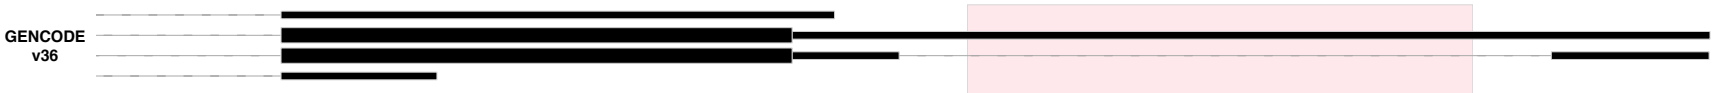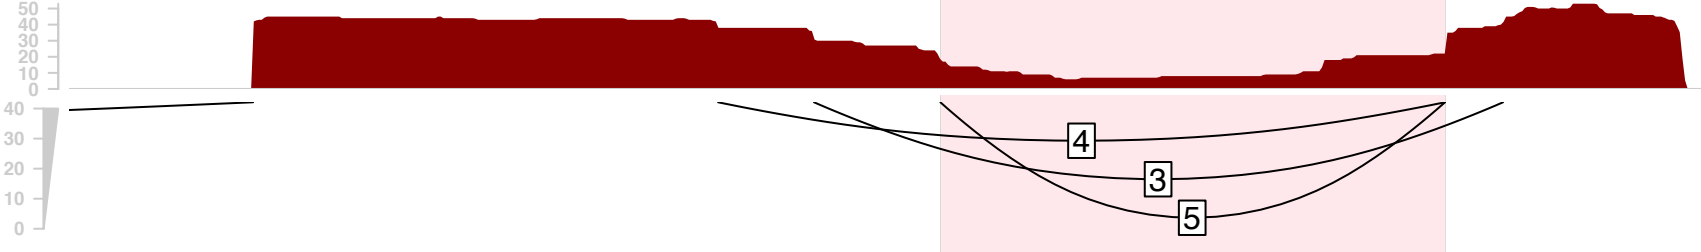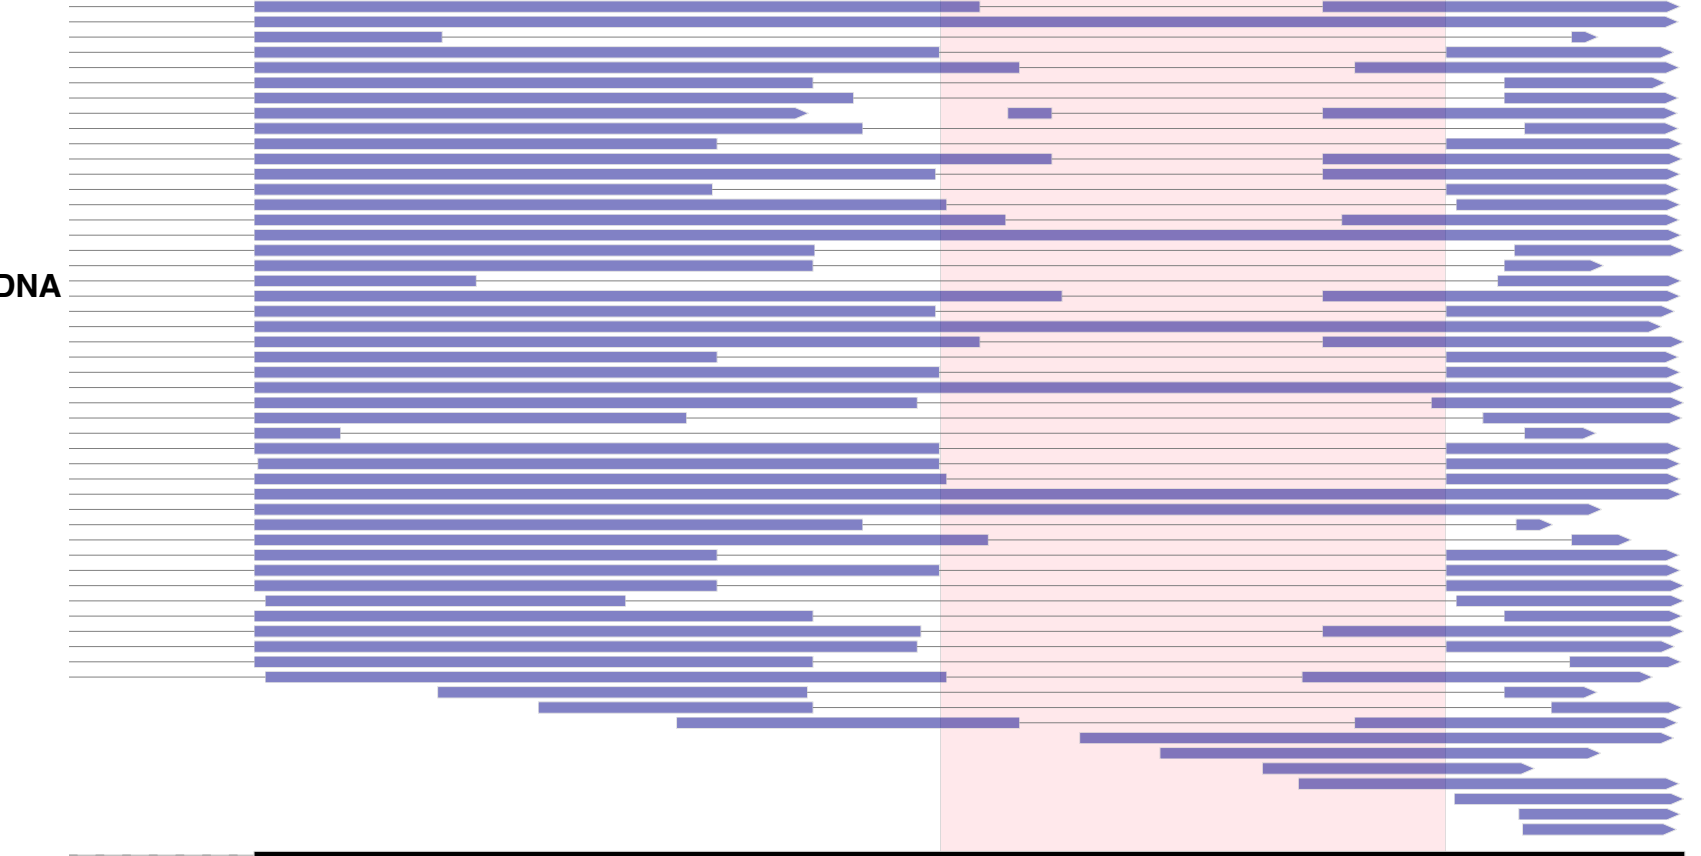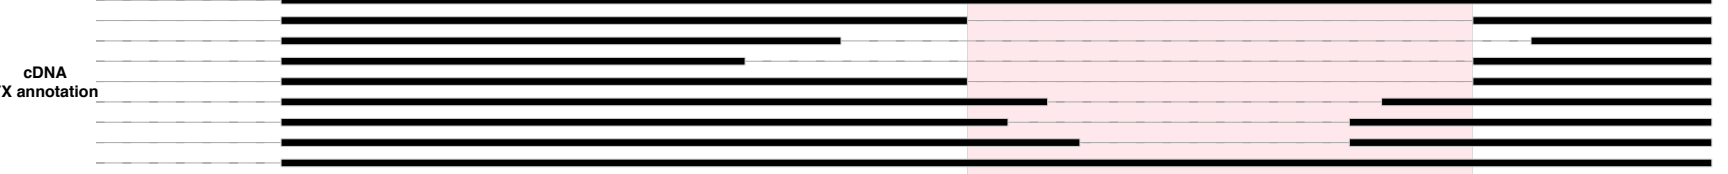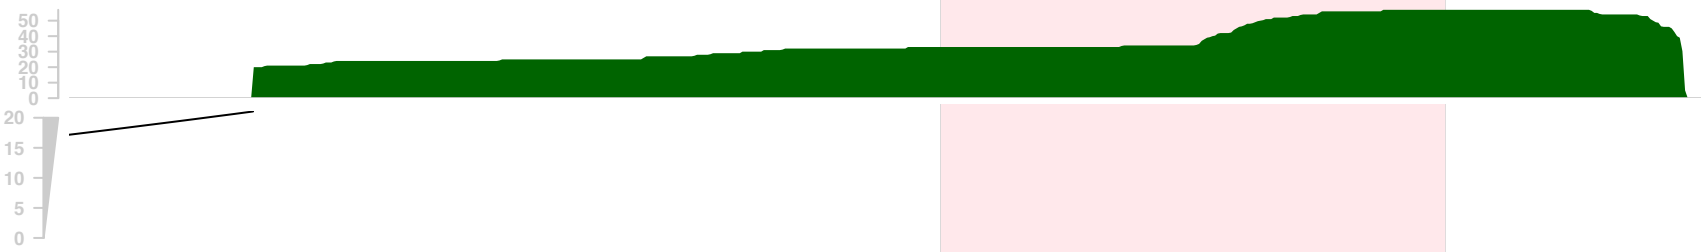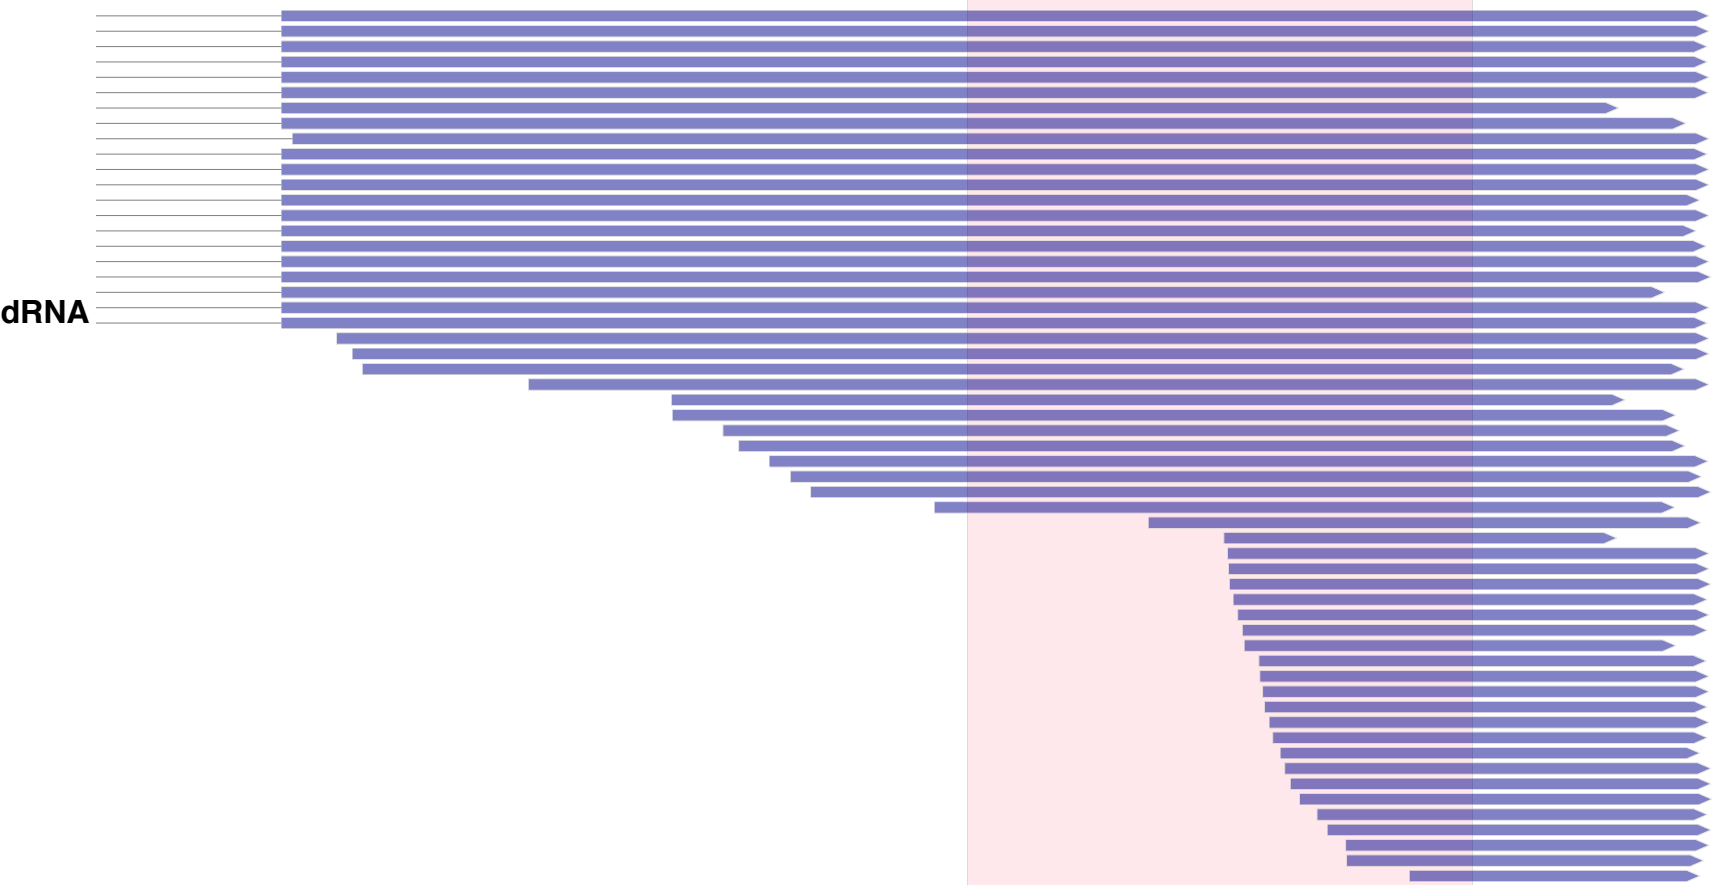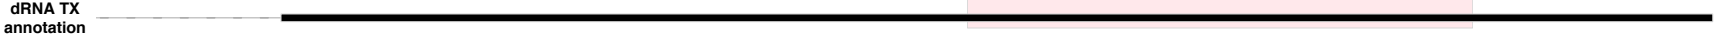

# chr5:163437659-163437758:+ CCNG1

Cell line: A549

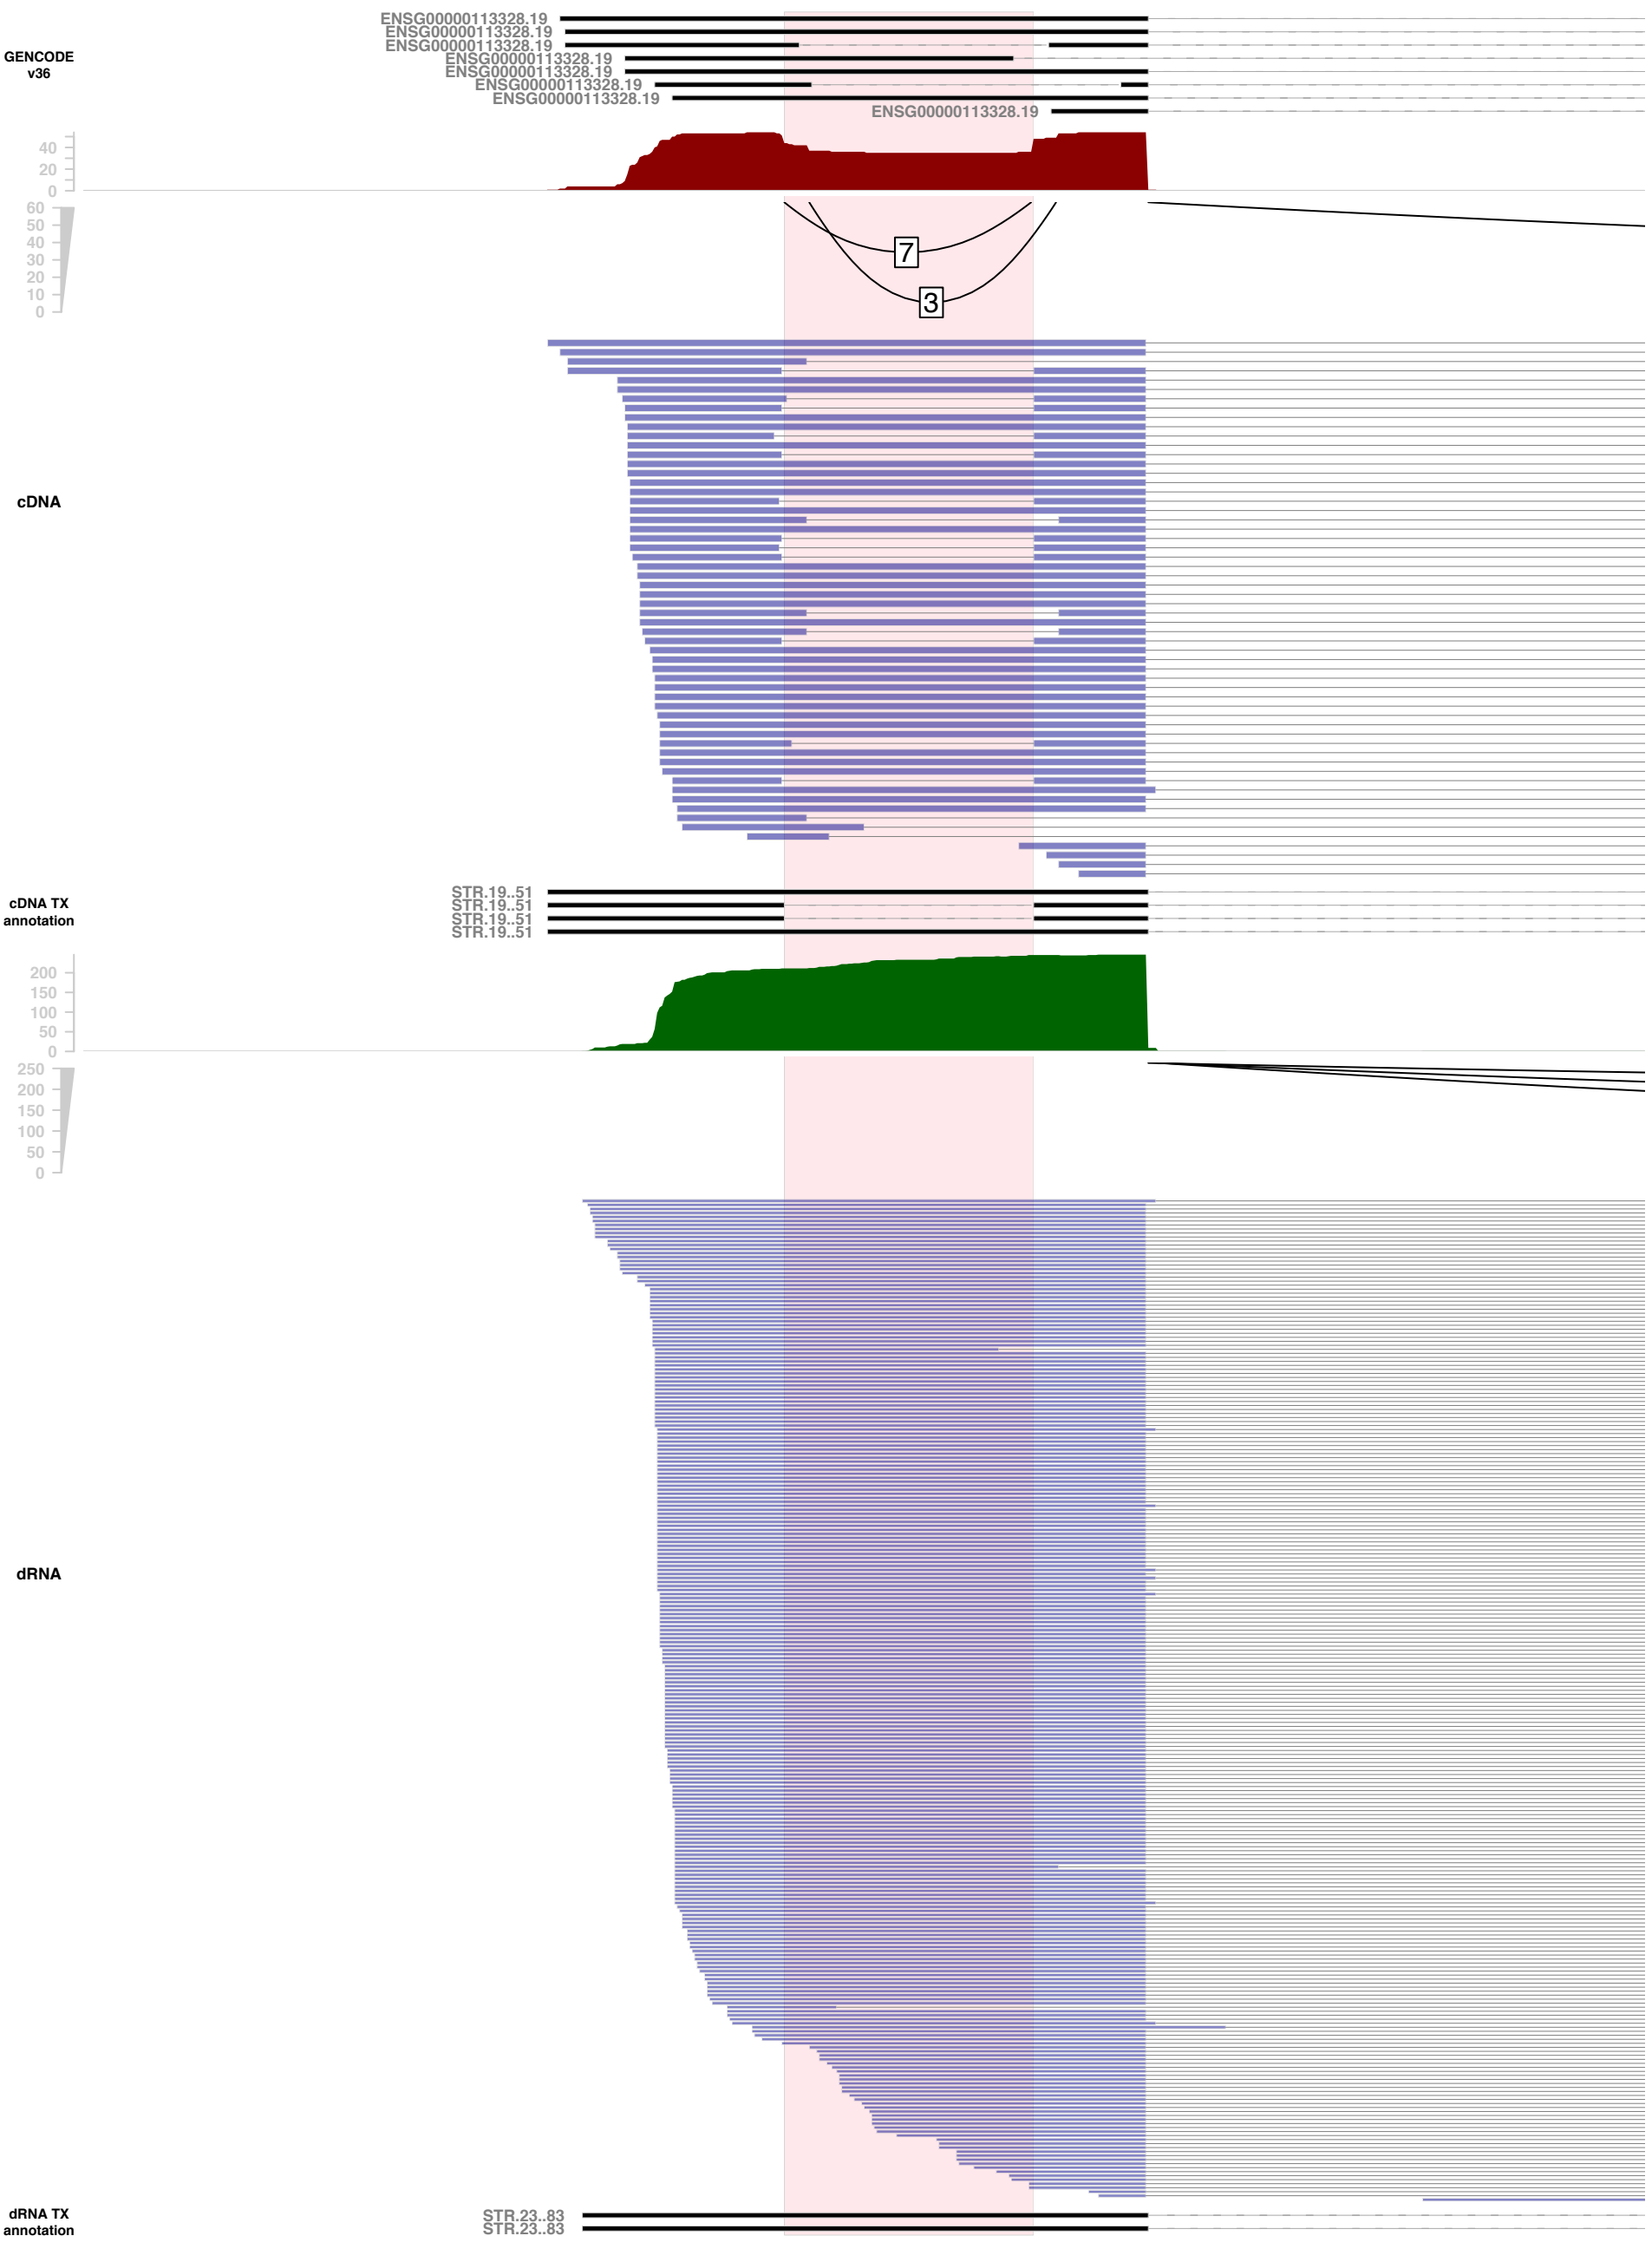

chr8:47976979-47977736:+ MCM4

Cell line: A549

GENCODE  
v36

ENSG00000104738.18

100  
50  
0  
70  
60  
50  
40  
30  
20  
10  
0

6

cDNA

cDNA TX  
annotation

600  
400  
200  
0  
600  
500  
400  
300  
200  
100  
0

dRNA

dRNA TX  
annotation

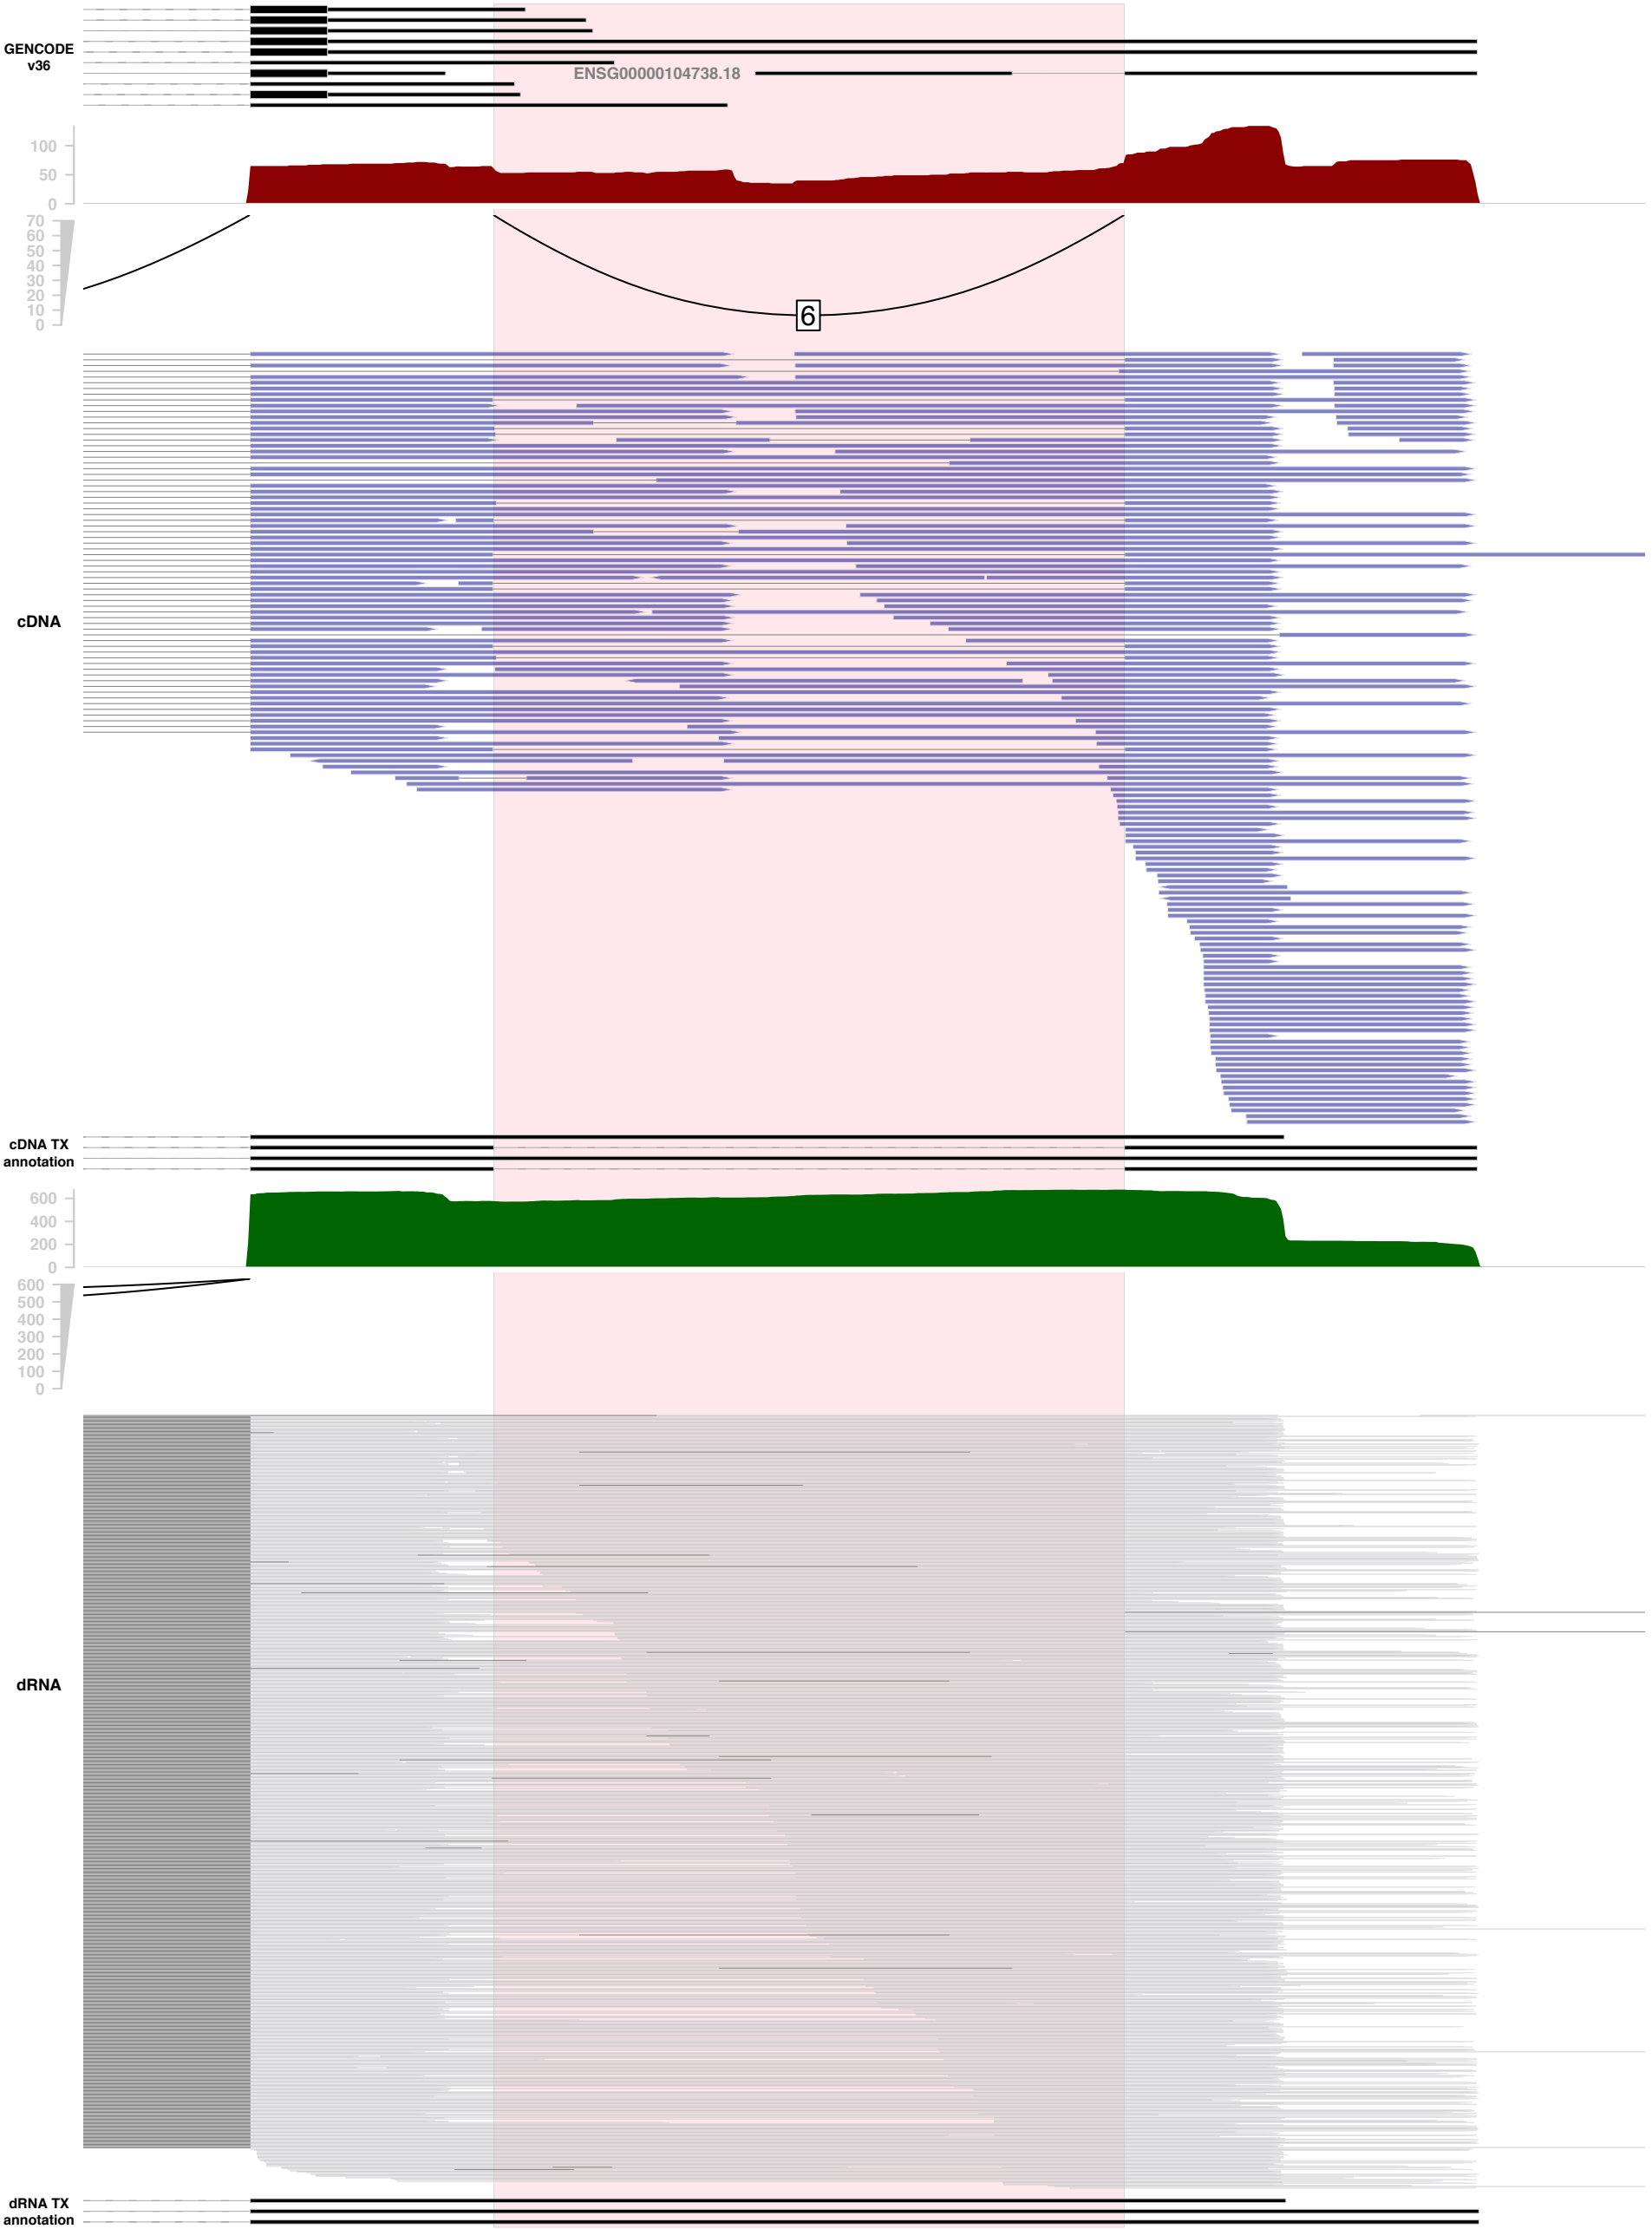

chr12:75501816-75501921:+ GLIPR1

Cell line: A549

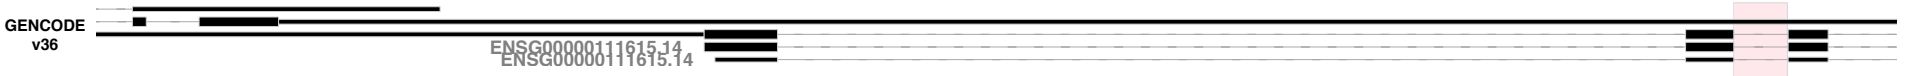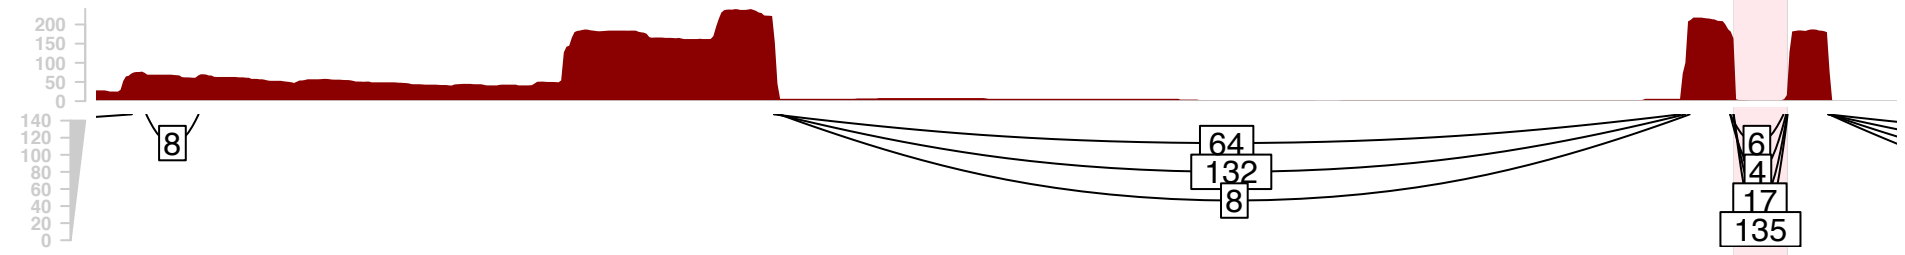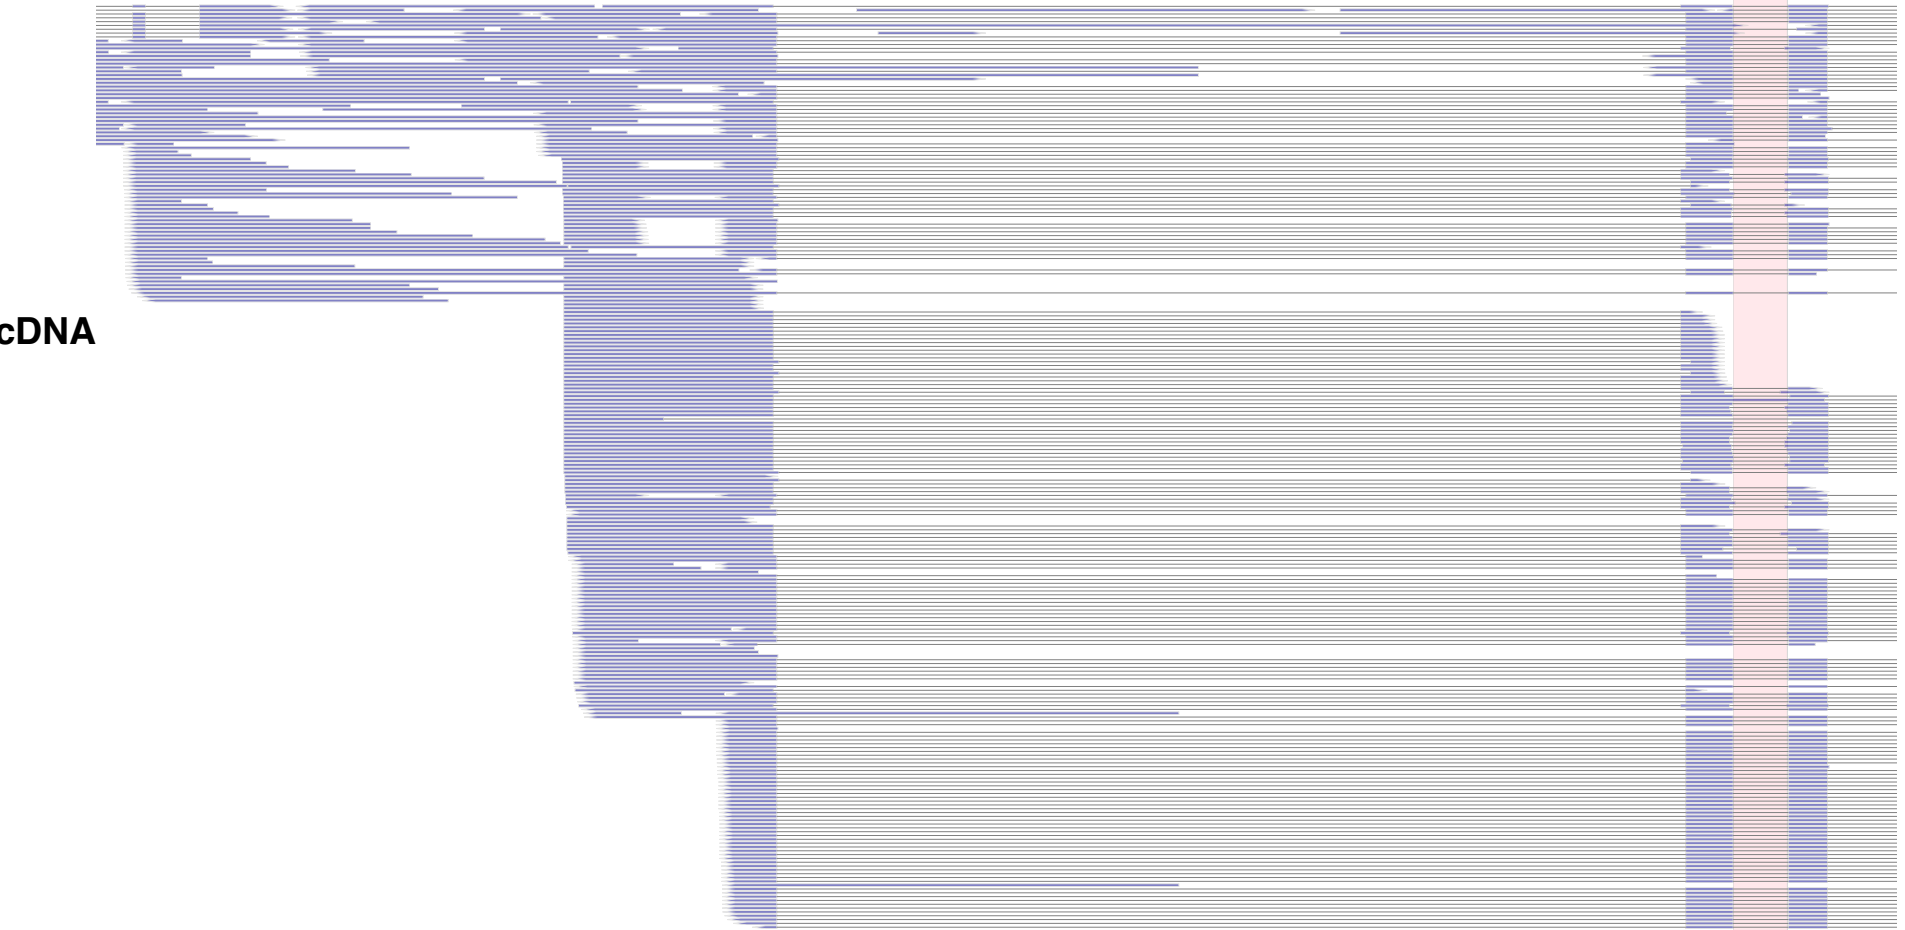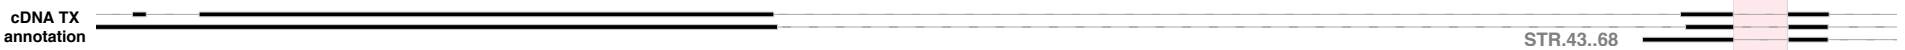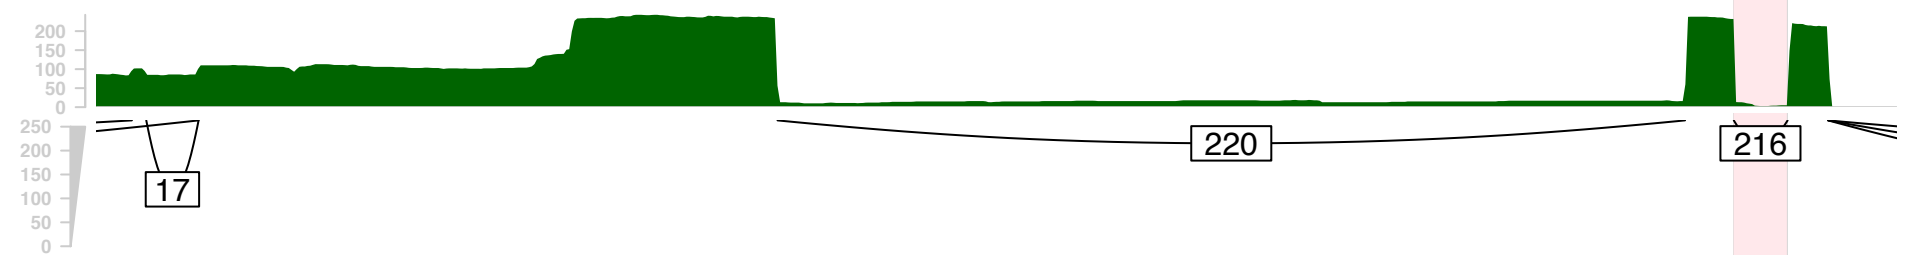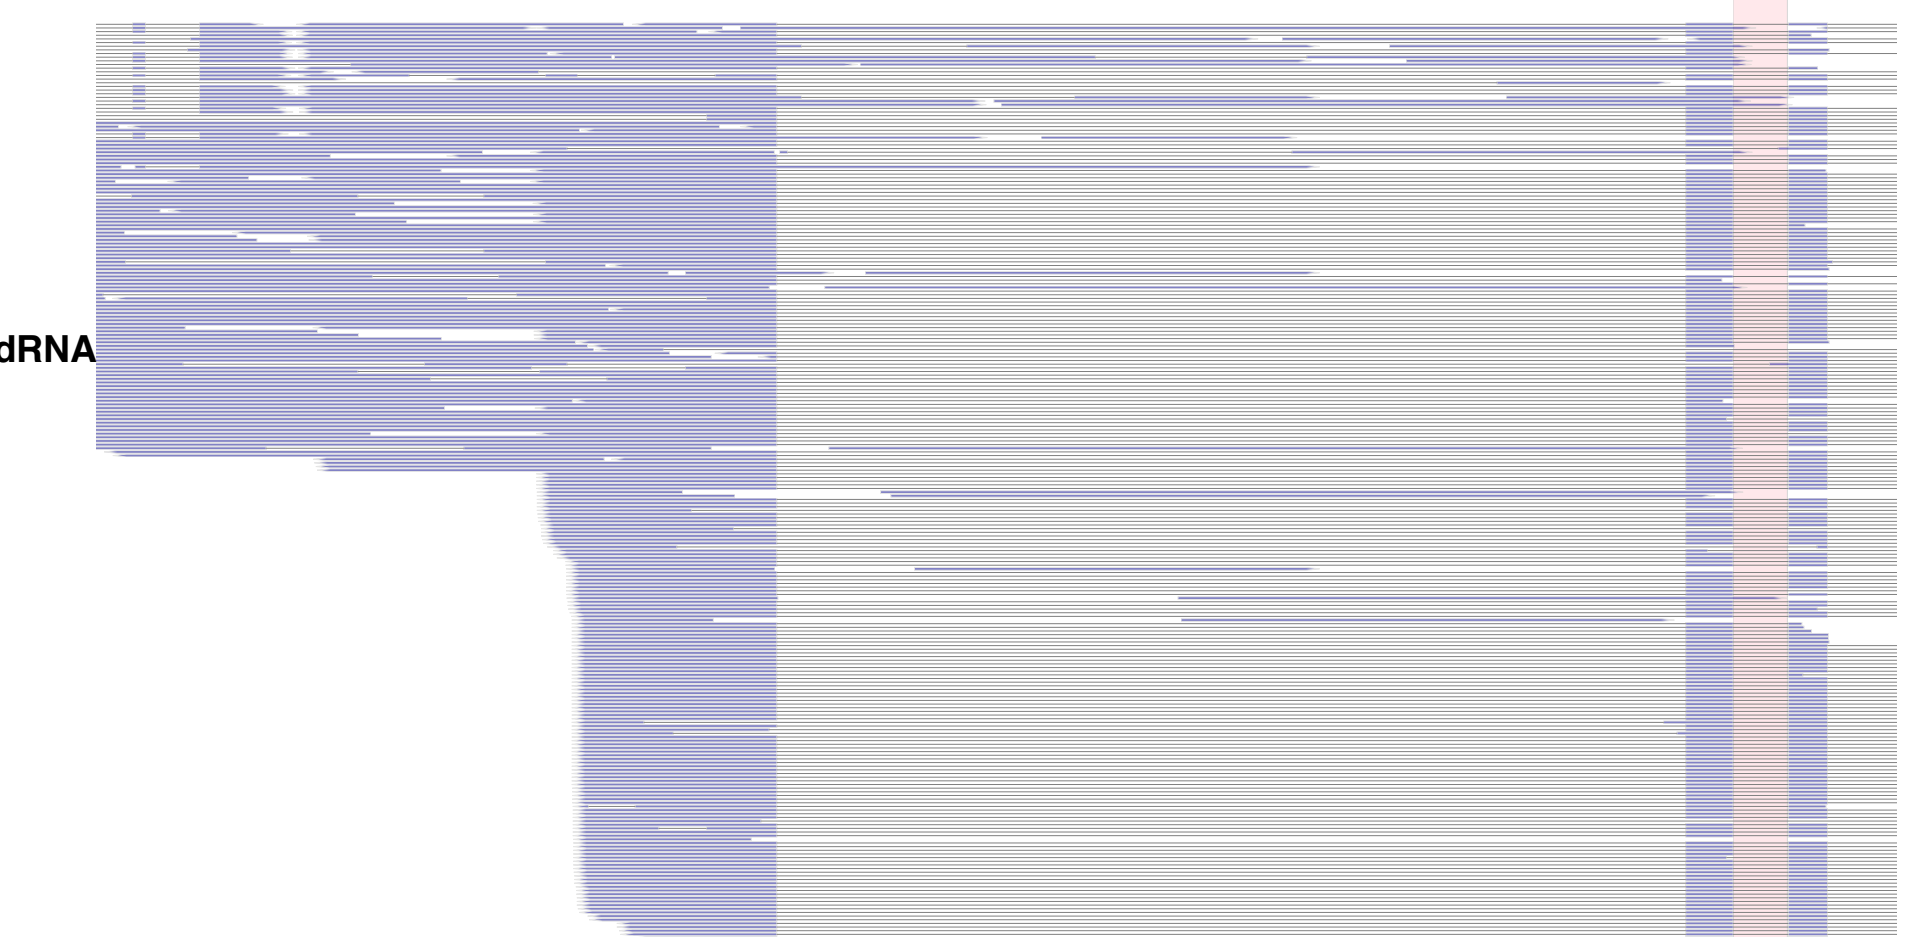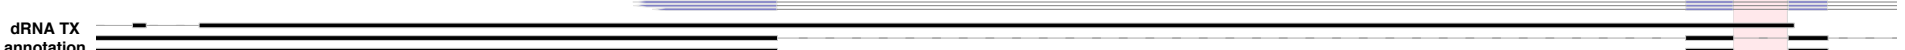

# chr15:63121977-63122084:+ LACTB

Cell line: A549

GENCODE  
v36

ENSG00000103642.12  
ENSG00000103642.12

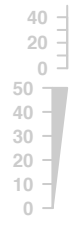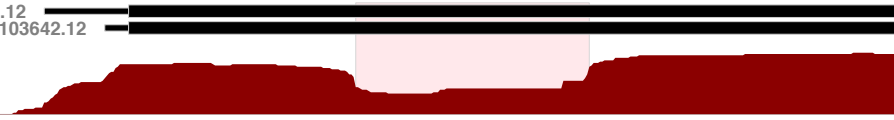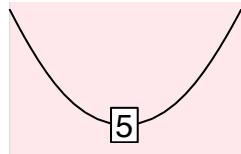

2

cDNA

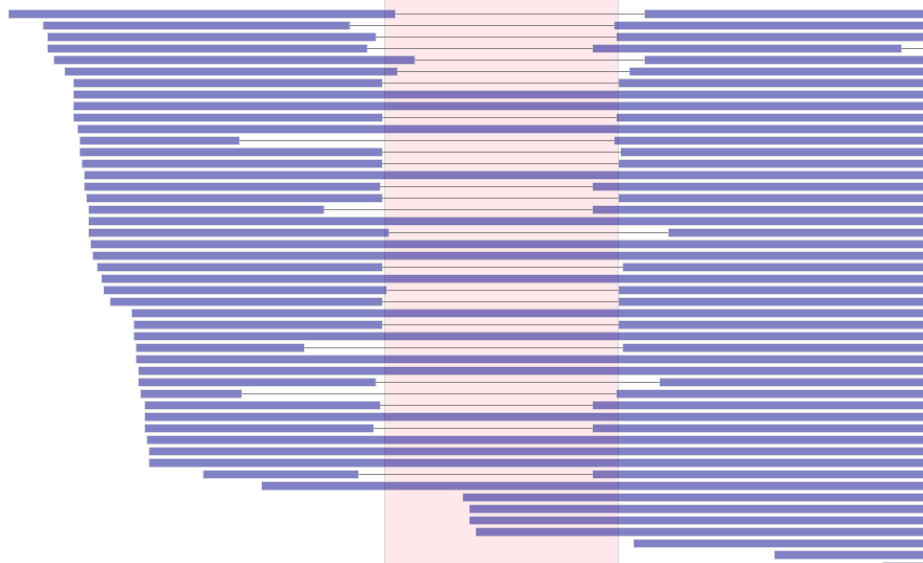

cDNA TX  
annotation

STR.48..200  
STR.48..200  
STR.48..200

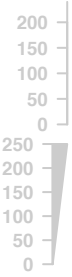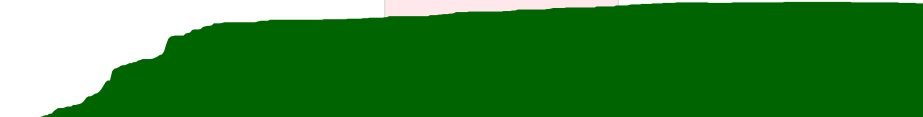

2

dRNA

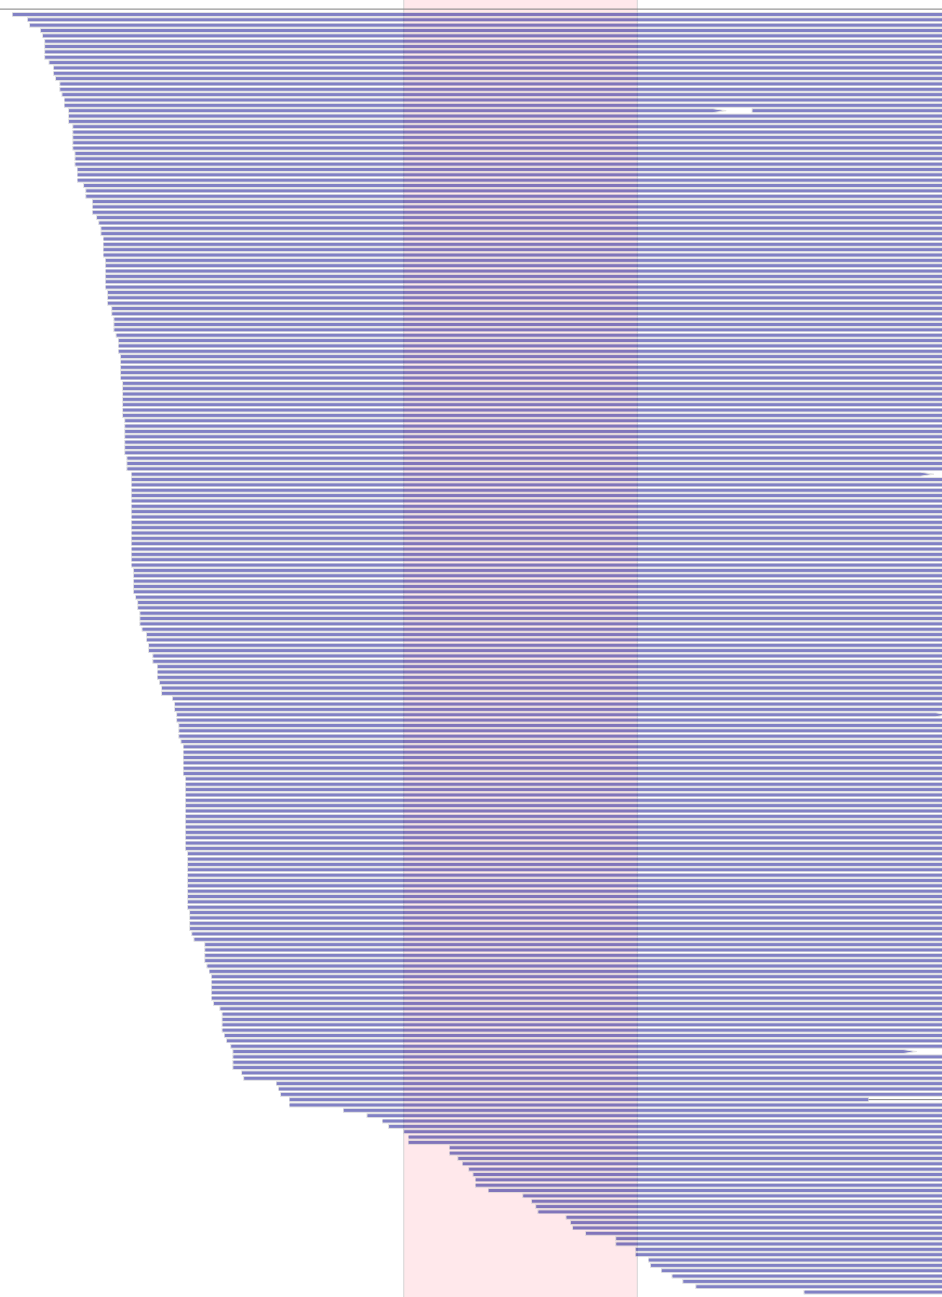

dRNA TX  
annotation

STR.62..201  
STR.62..201  
STR.62..201

chr17:3663563-3663657:- TAX1BP3,P2RX5-TAX1BP3

Cell line: A549

Direct repeat sequence: GACCG

GENCODE v36  
ENSG00000213977.8  
ENSG00000213977.8  
ENSG00000257950.3

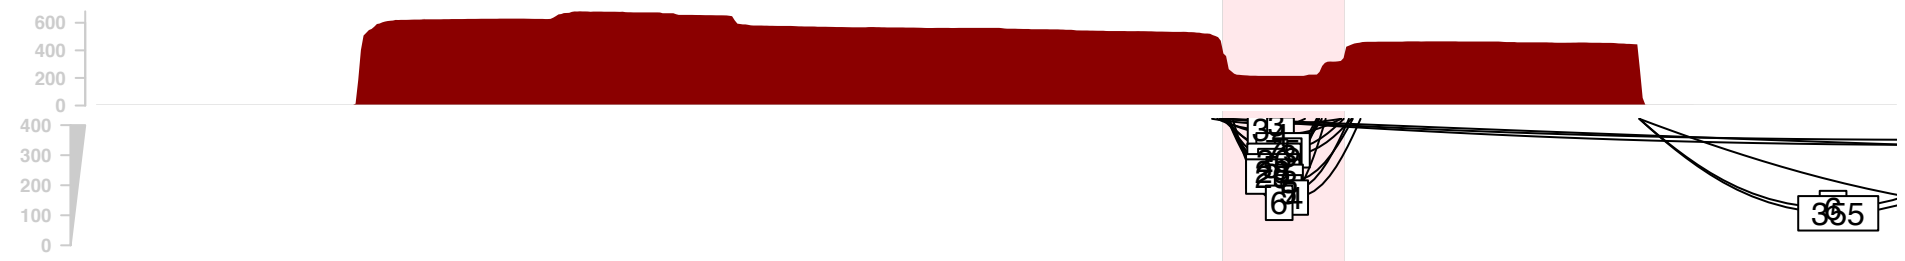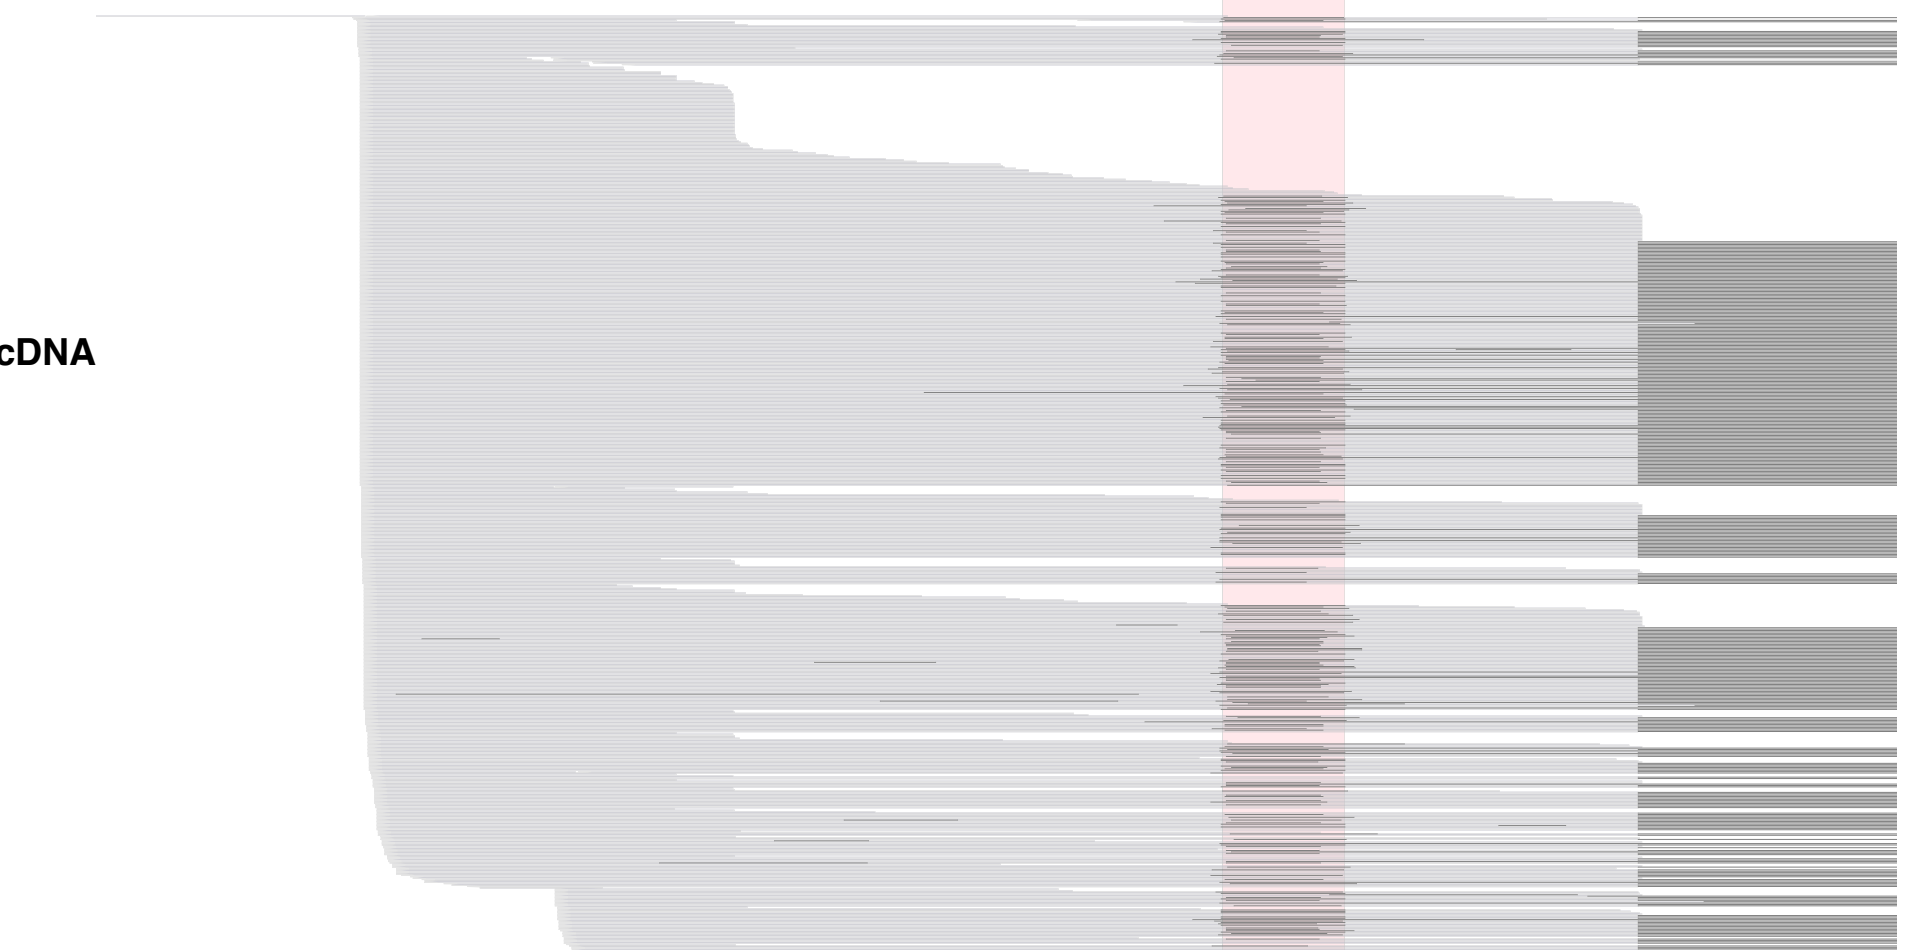

cDNA TX annotation  
STR.53..115

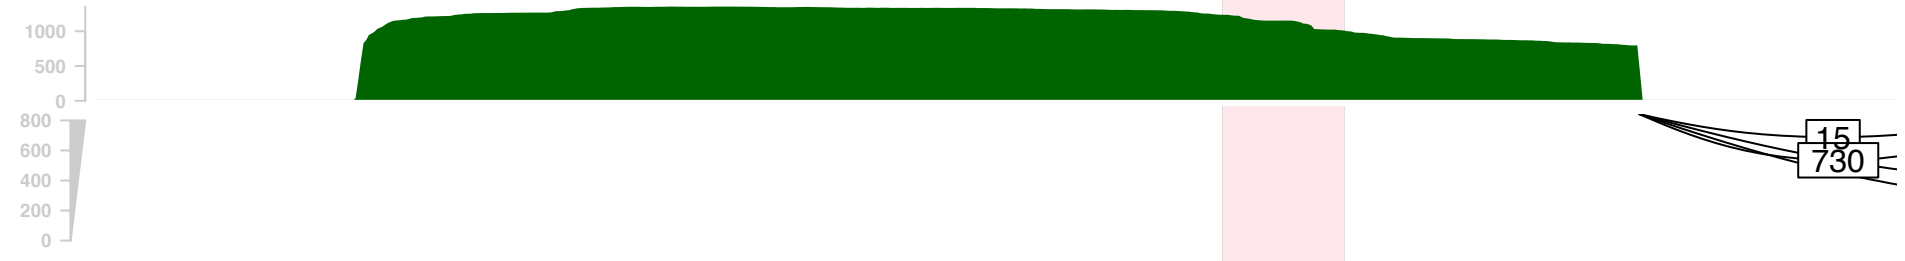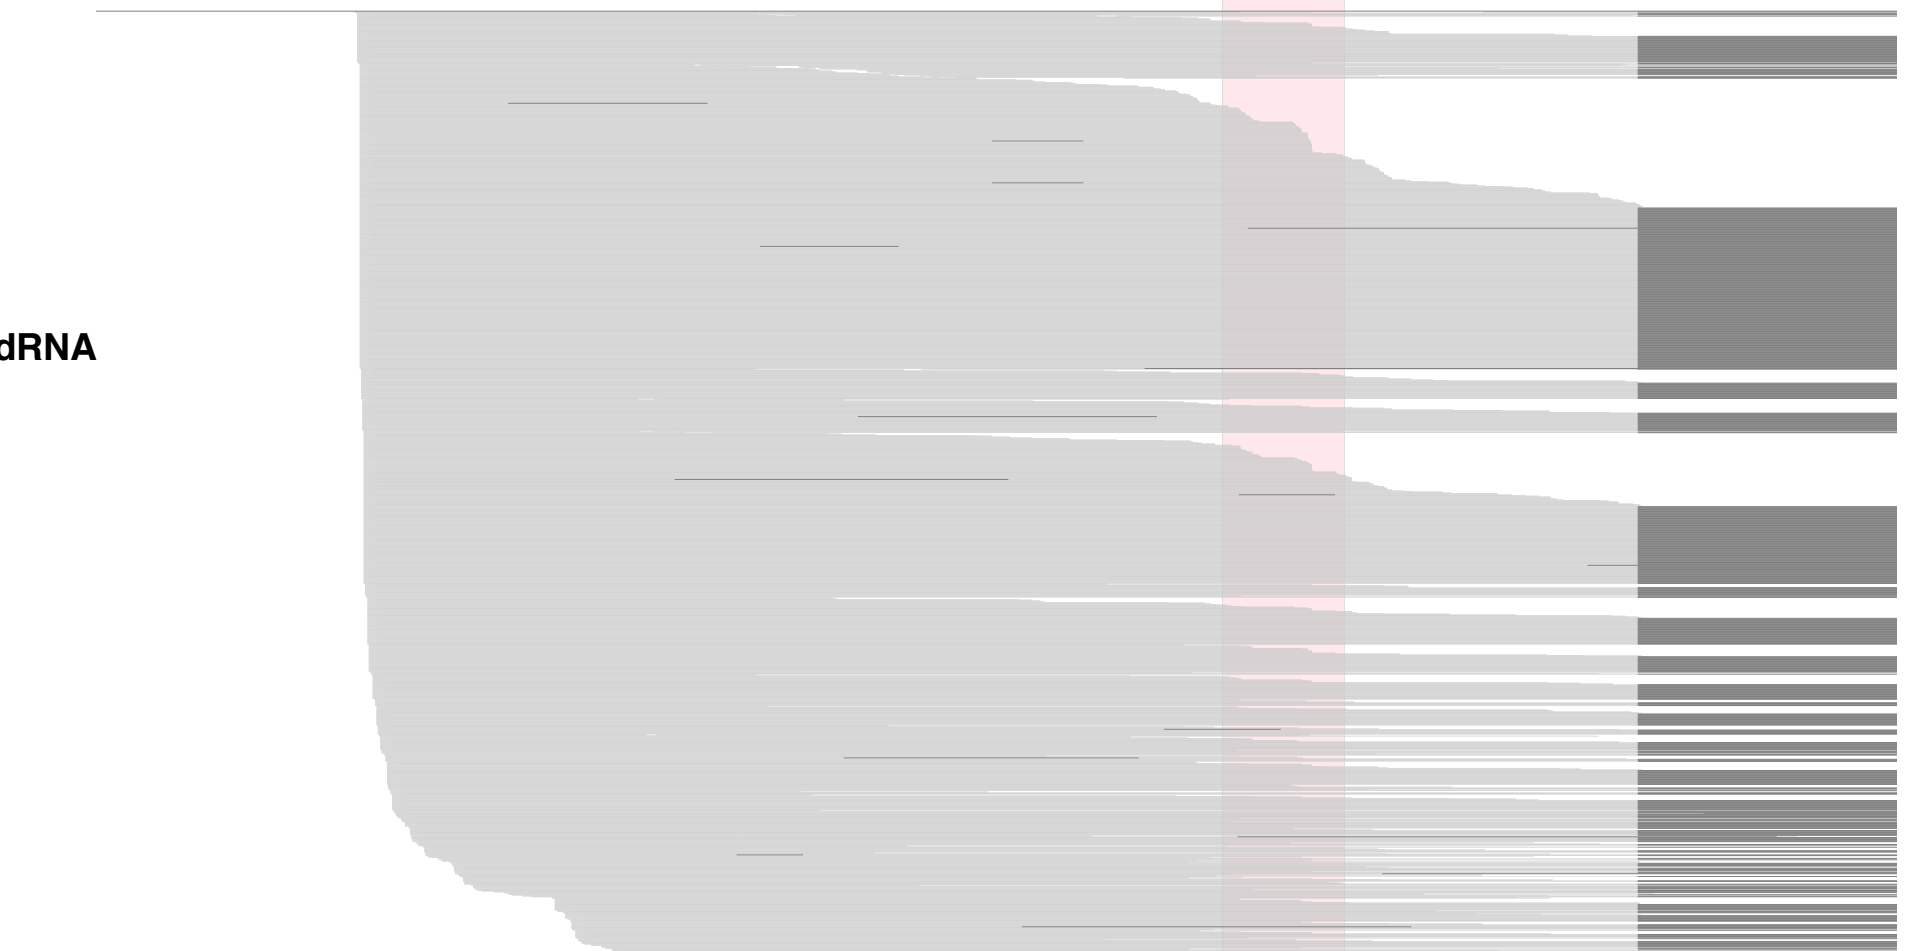

dRNA TX annotation  
STR.69..62

chr19:35746759-35746910:+ PSENN,AC002398.9

Cell line: A549

Direct repeat sequence: CCTG

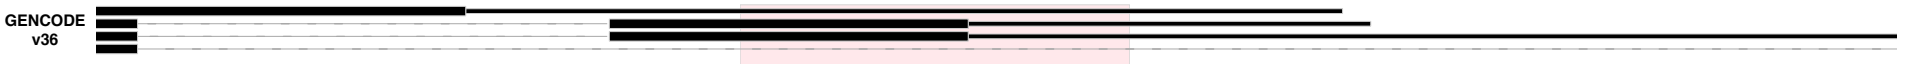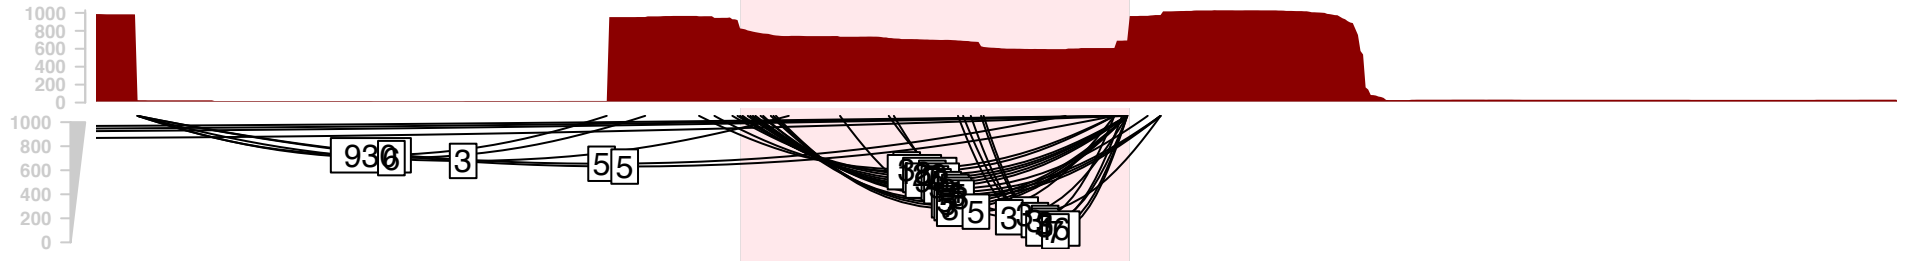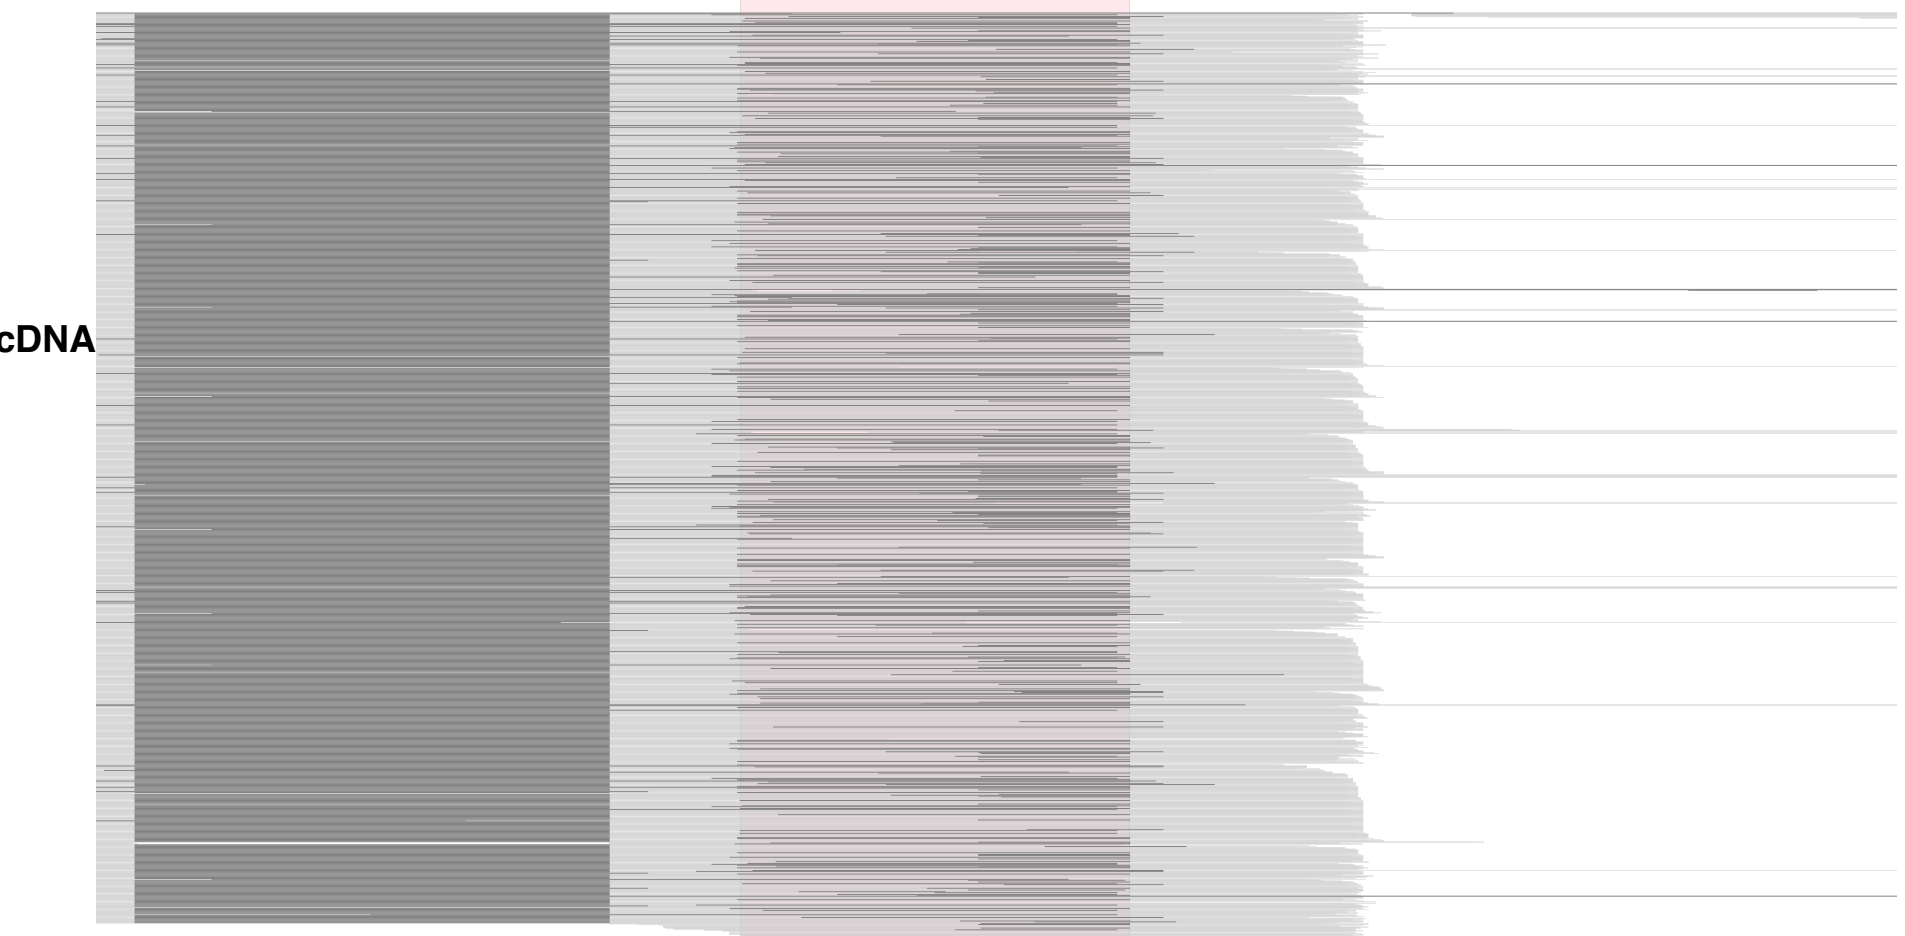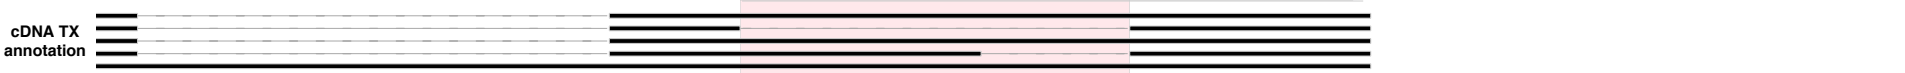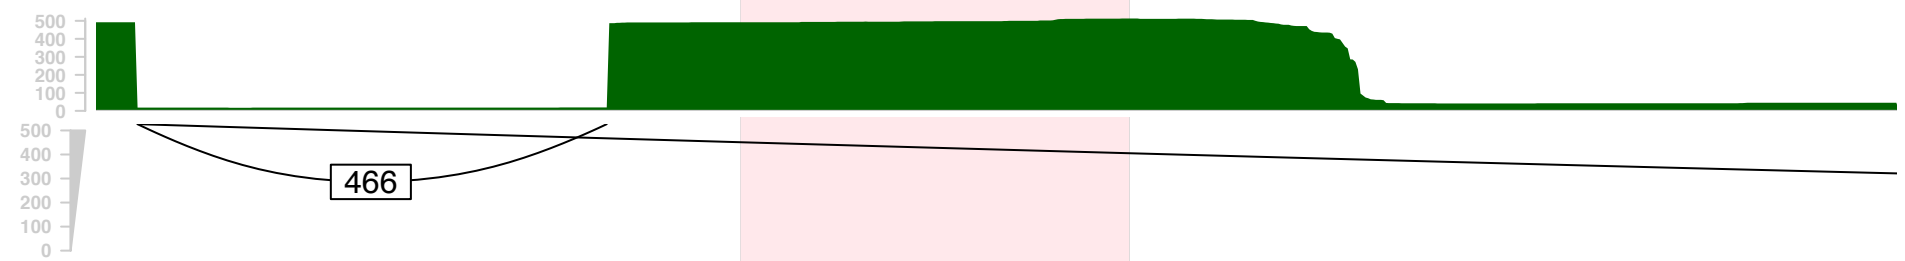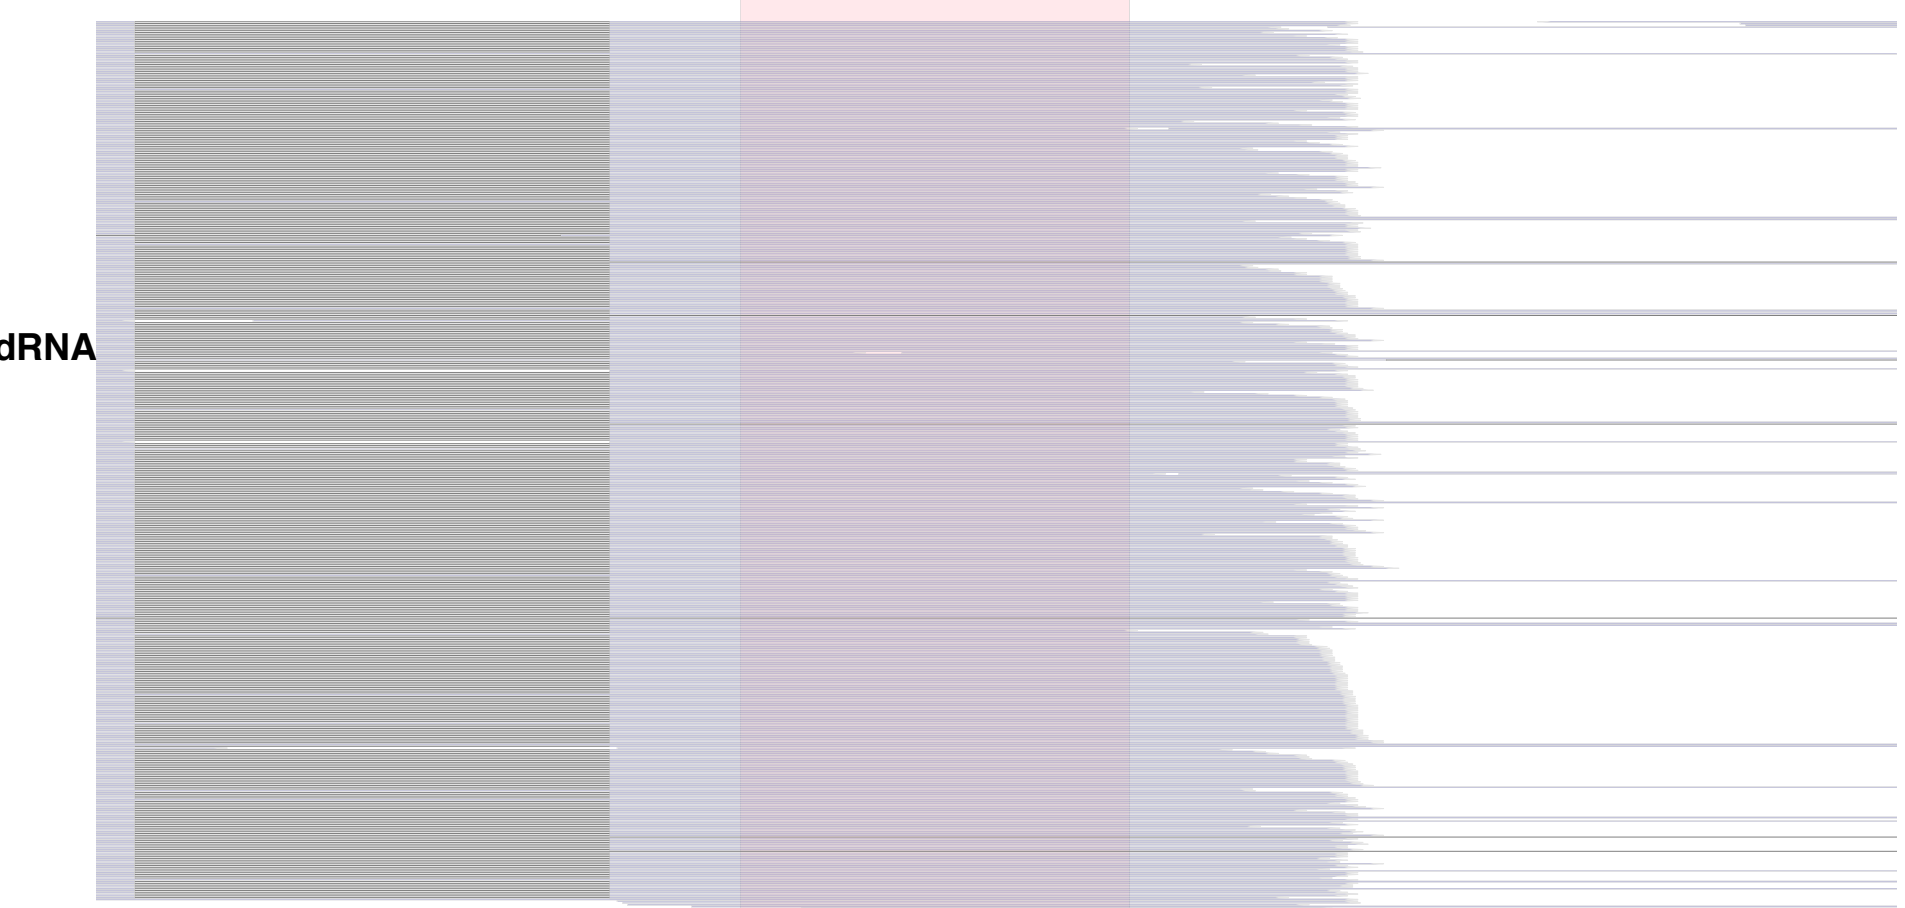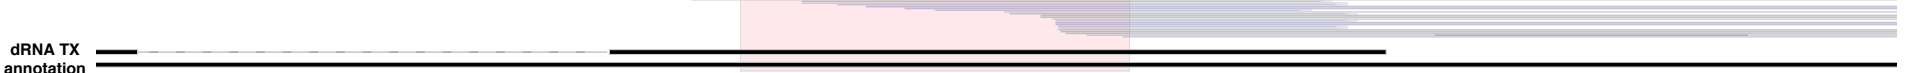



chr19:35746853-35746910:+ PSENN,AC002398.9

Cell line: A549

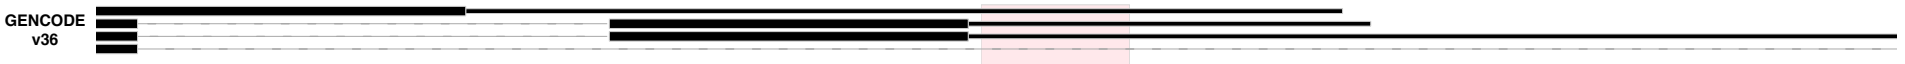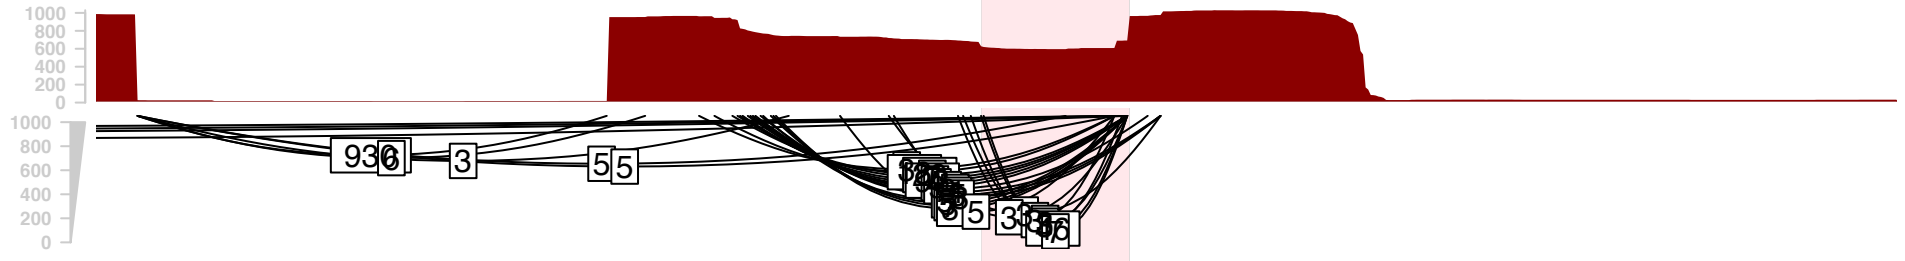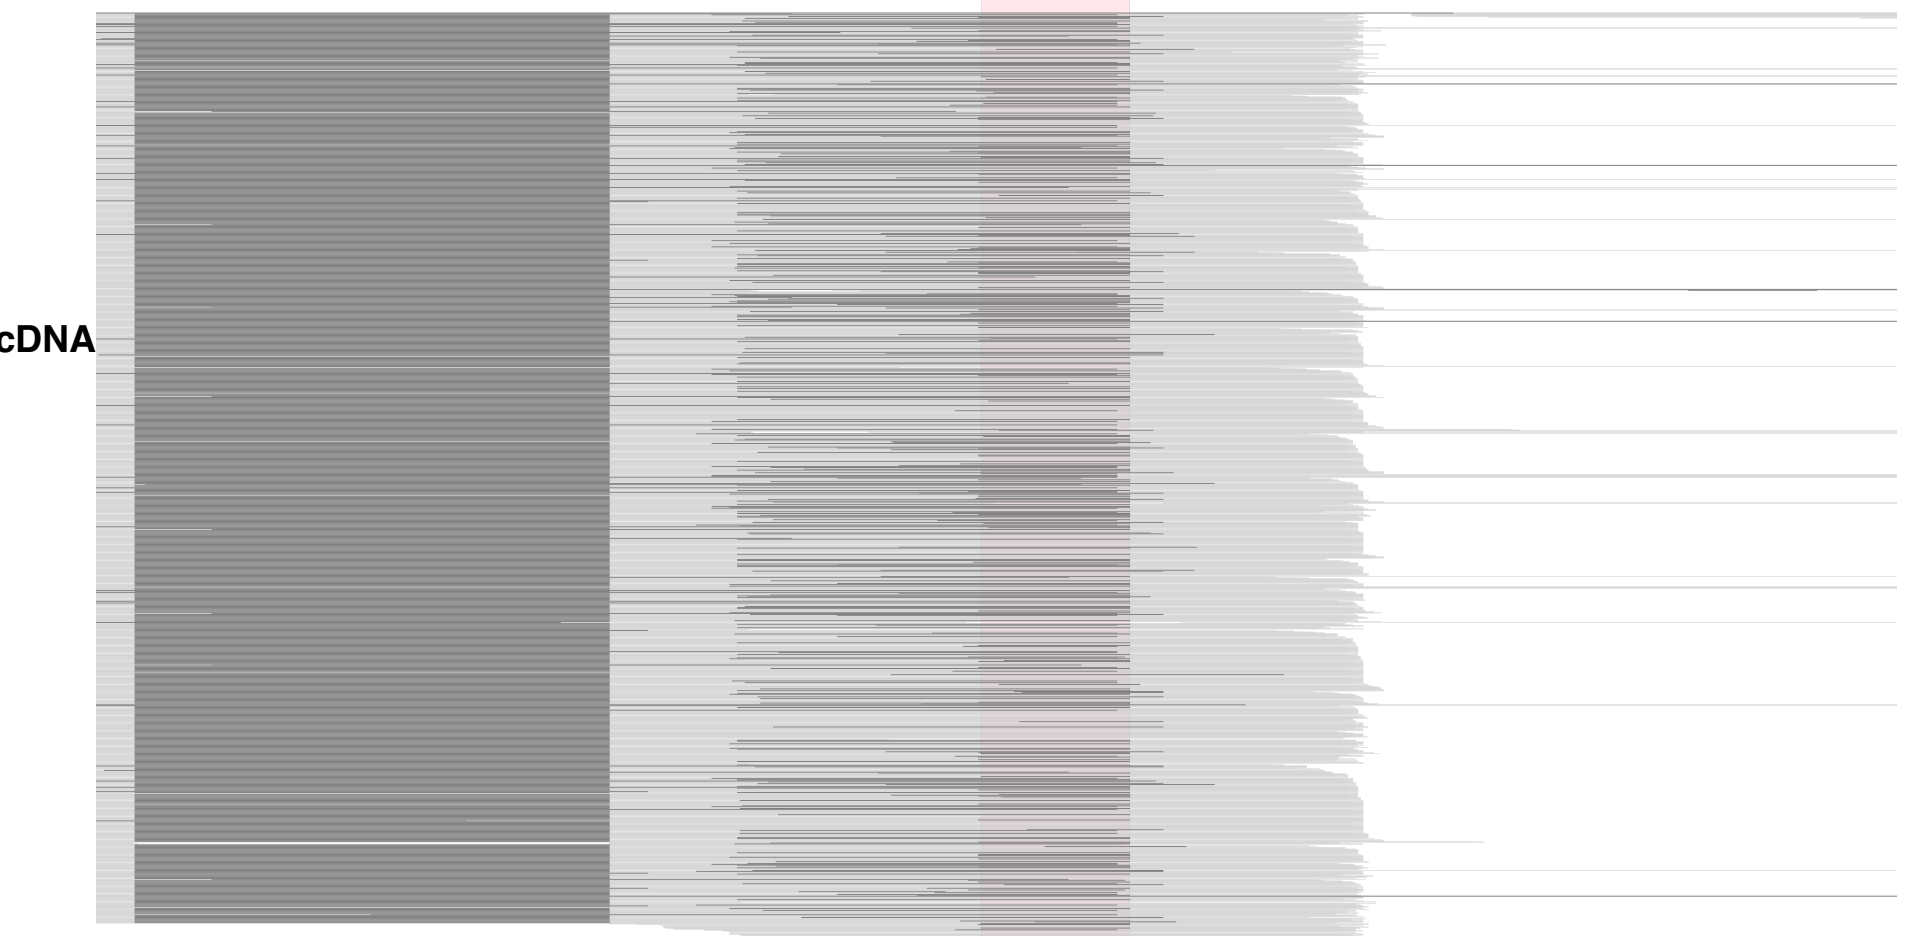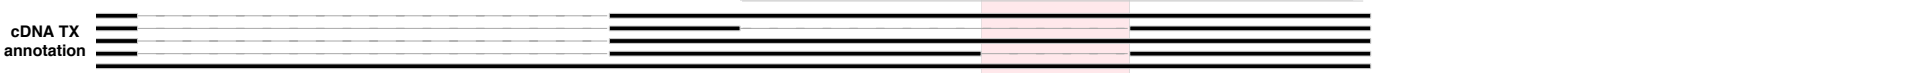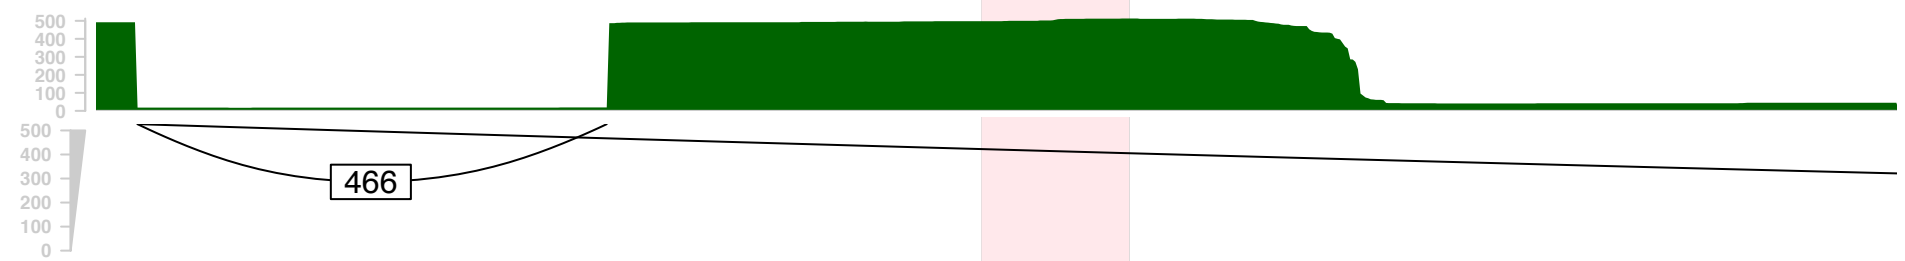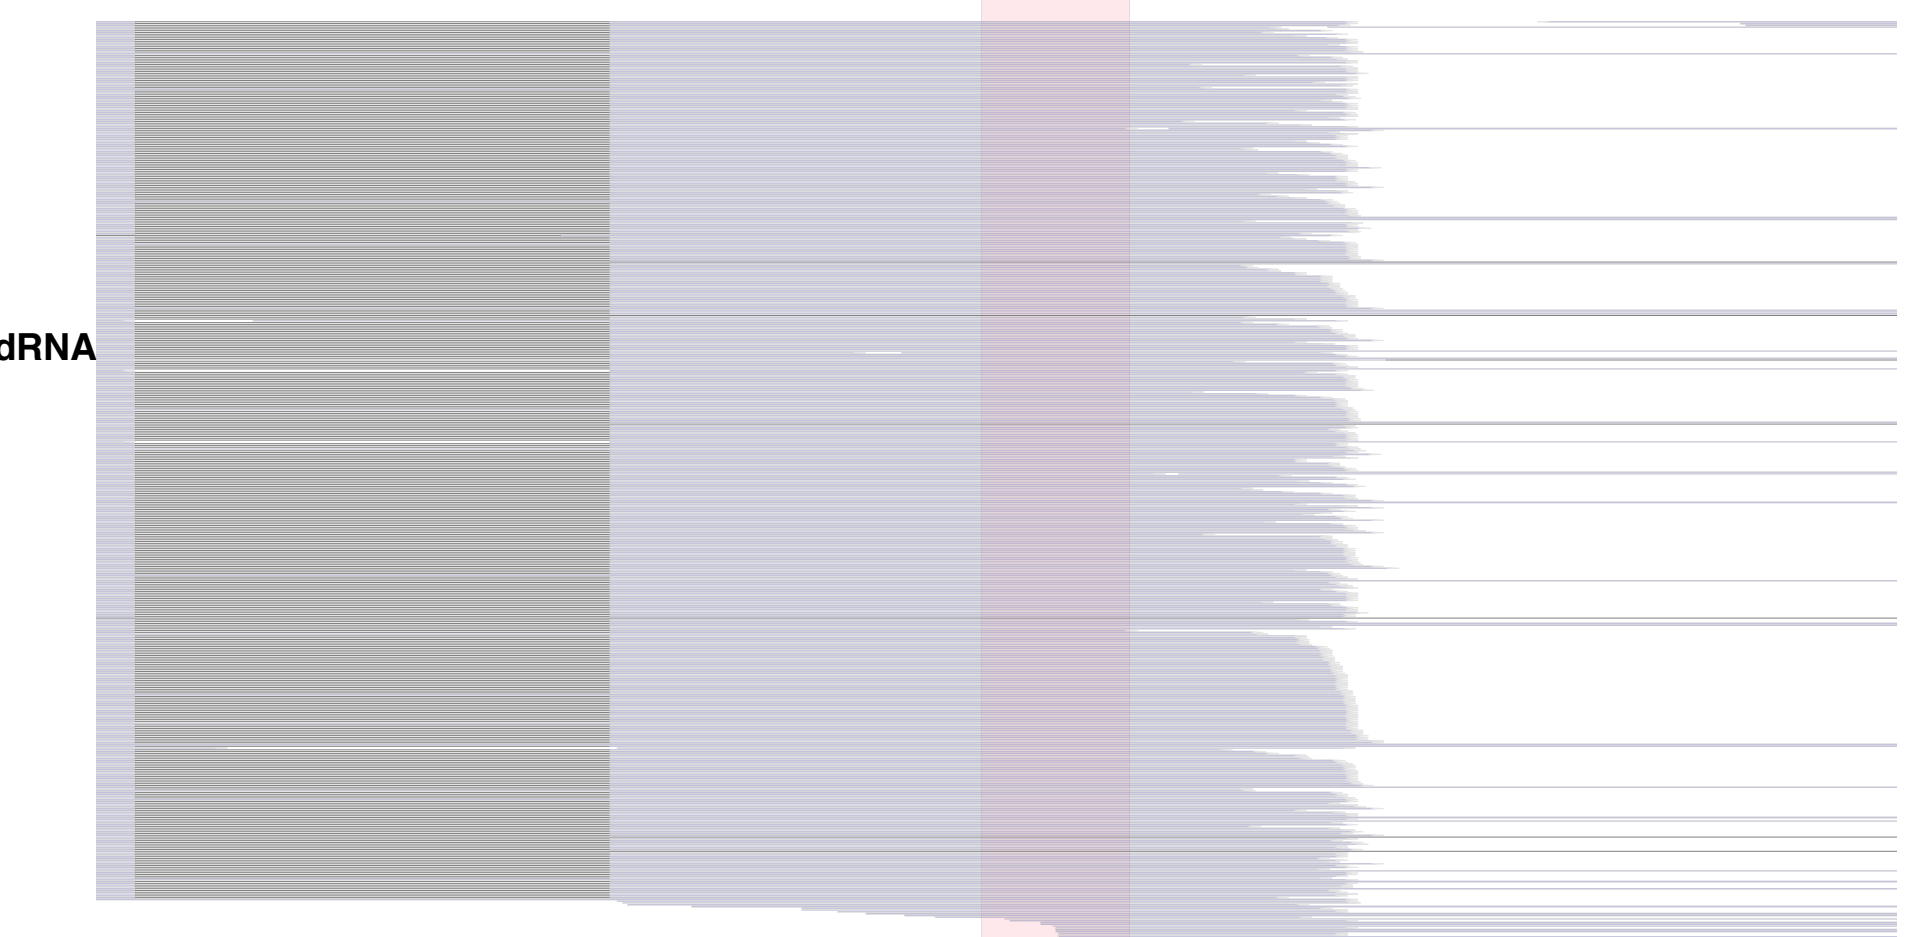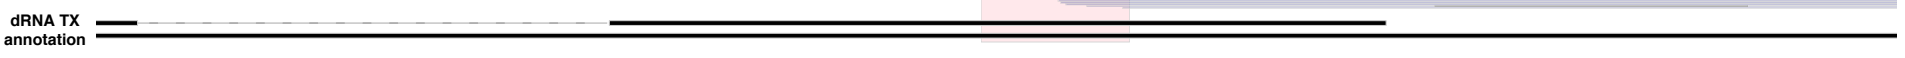

chr4:56459858-56460922:+ PAICS

Cell line: A549

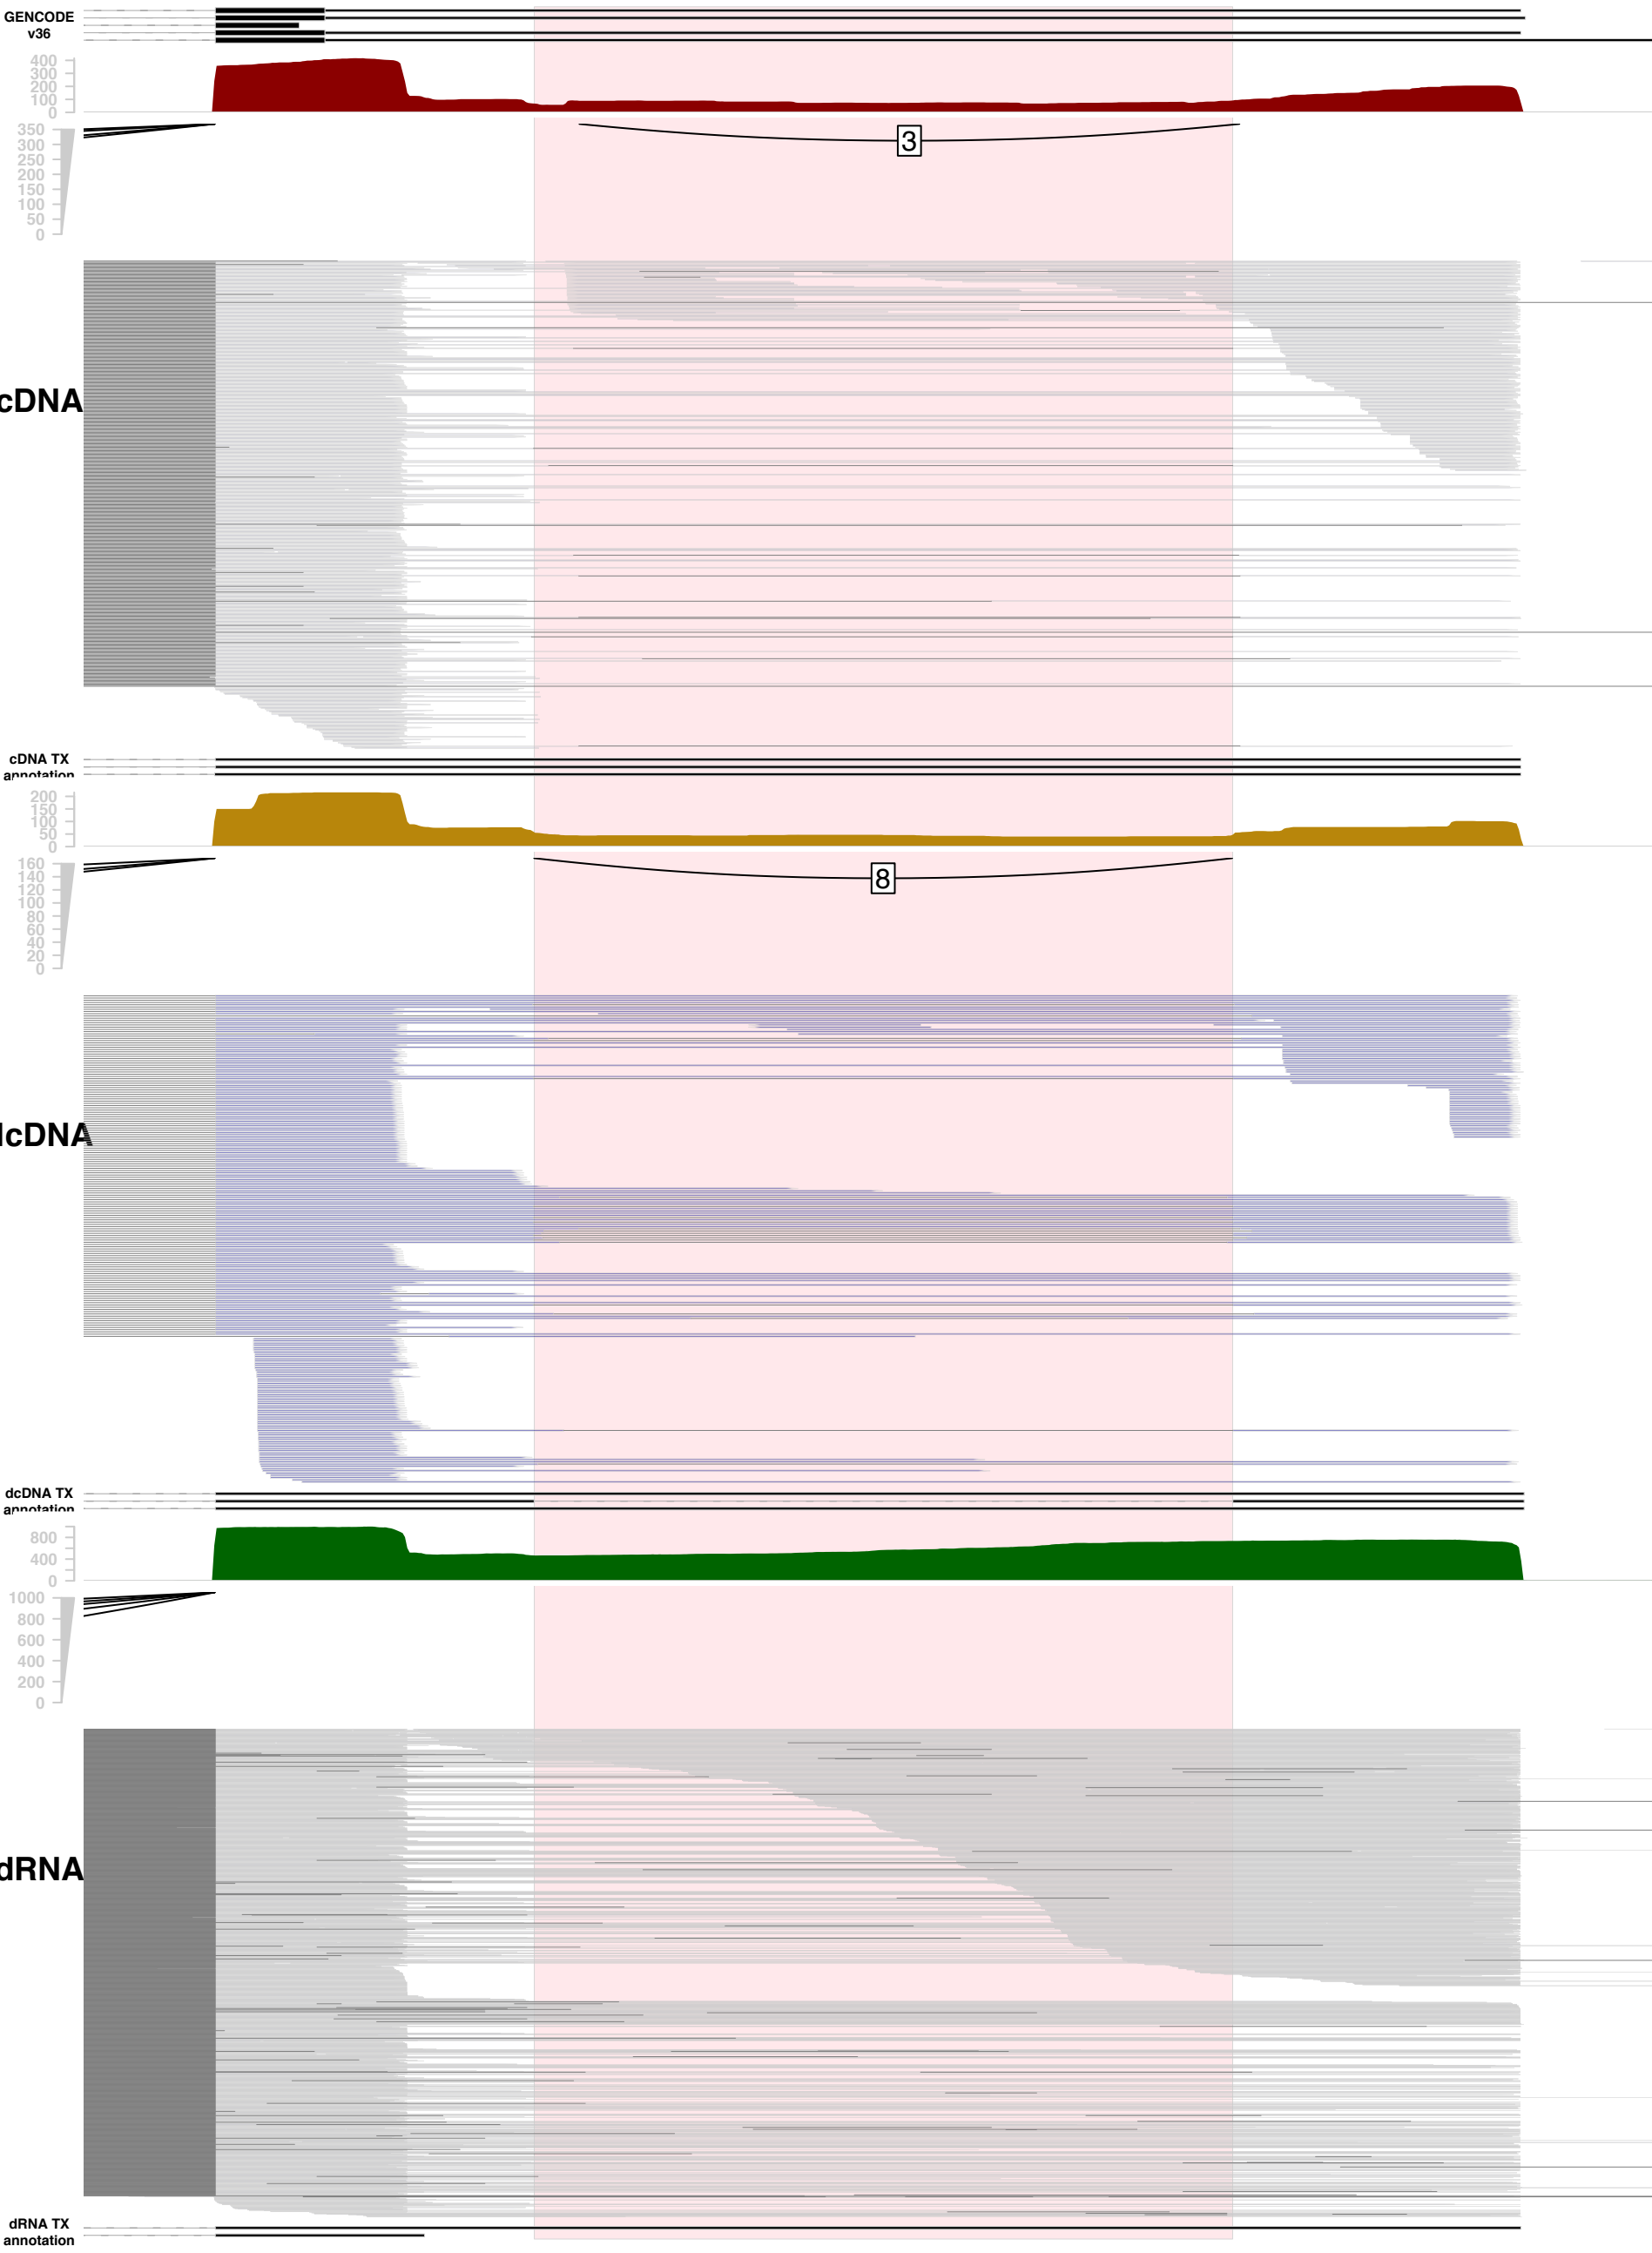

chr1:8012958-8013358:- ERRFI1  
Cell line: Hct116  
Direct repeat sequence: GGGAAGC

GENCODE 0116285.13 v36  
ENSG00000116285.12  
ENSG00000116285.13  
ENSG00000116285.13

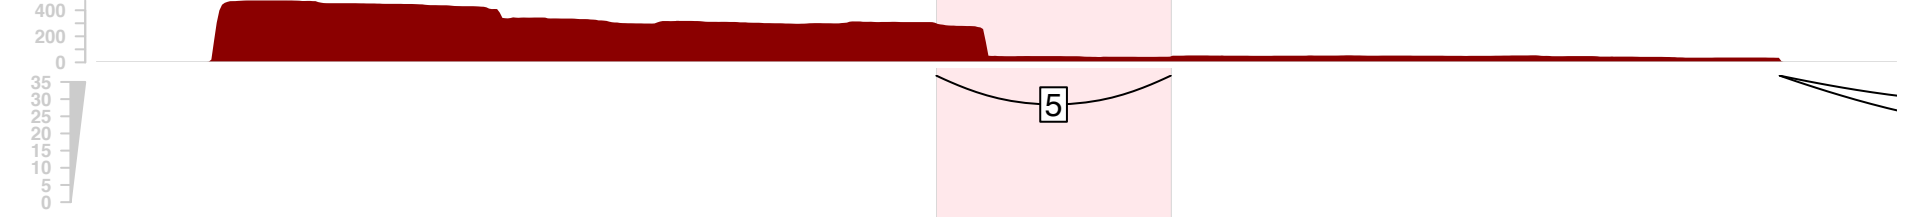

cDNA

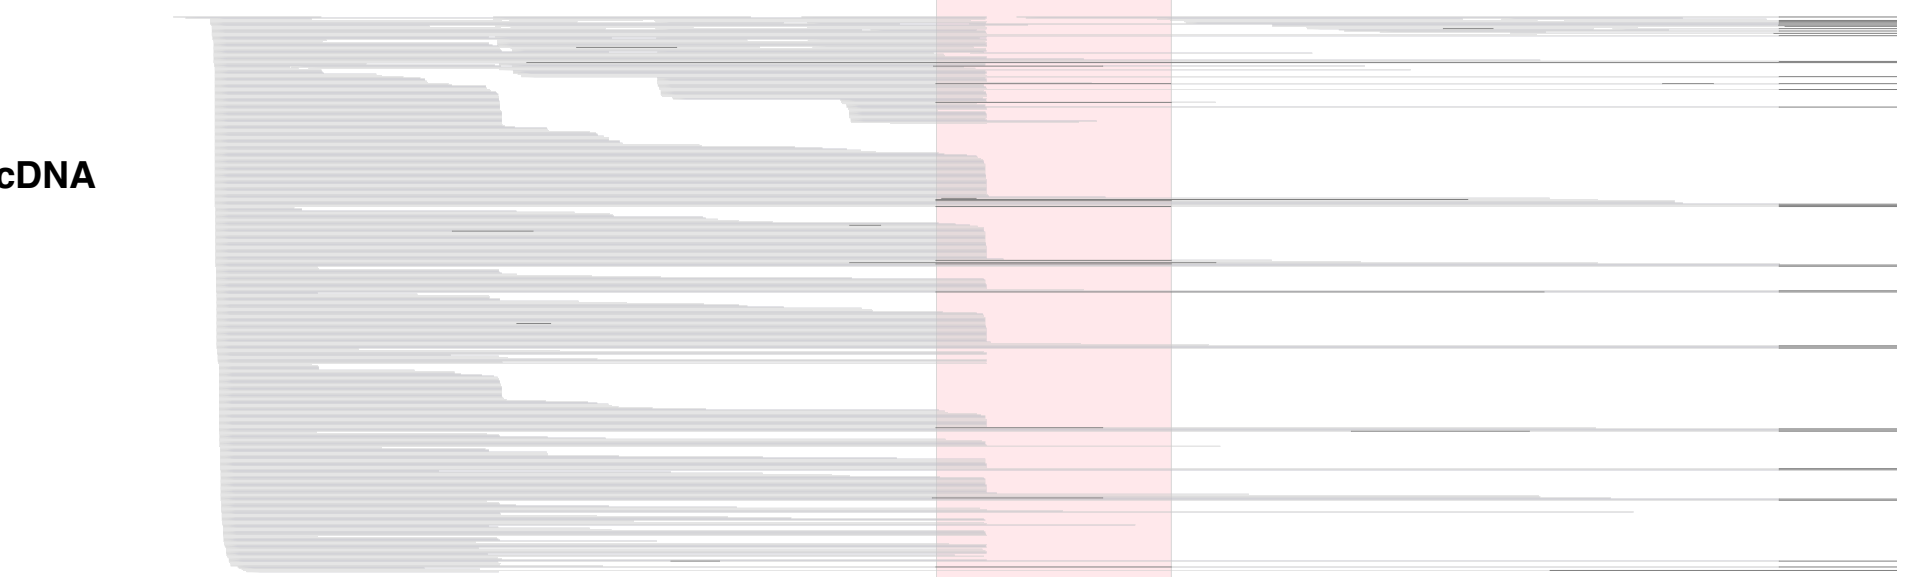

cDNA TX annotation 1:136  
1:138

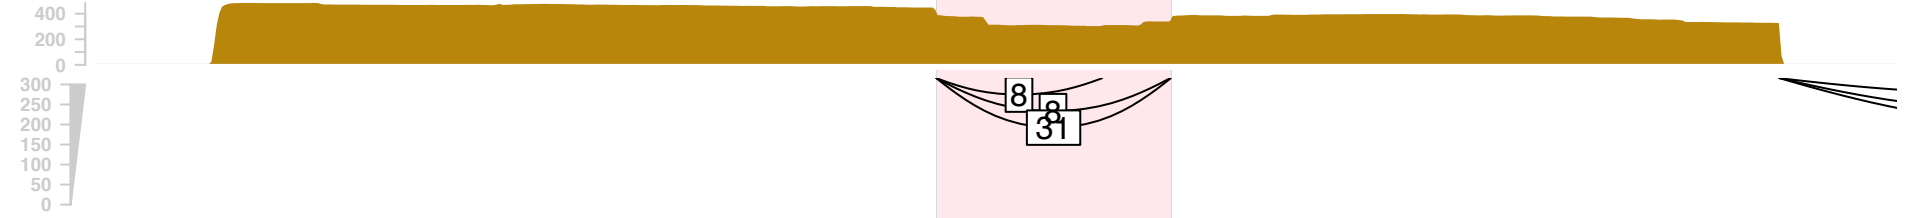

cDNA

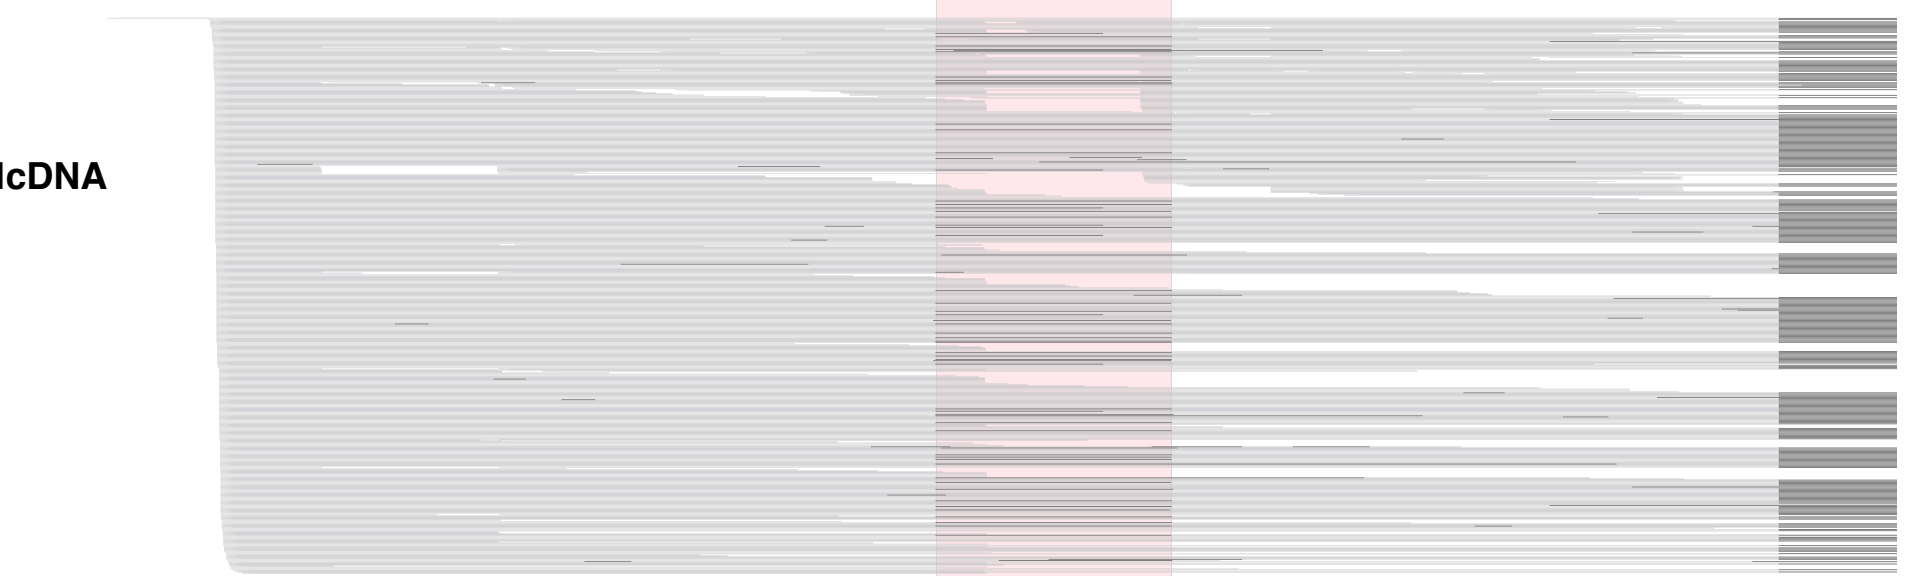

dcDNA TX annotation 1:136  
1:138

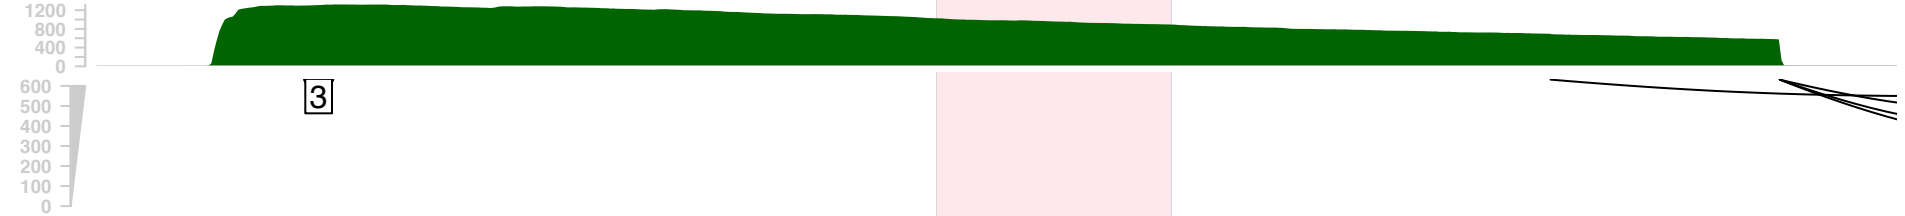

dRNA

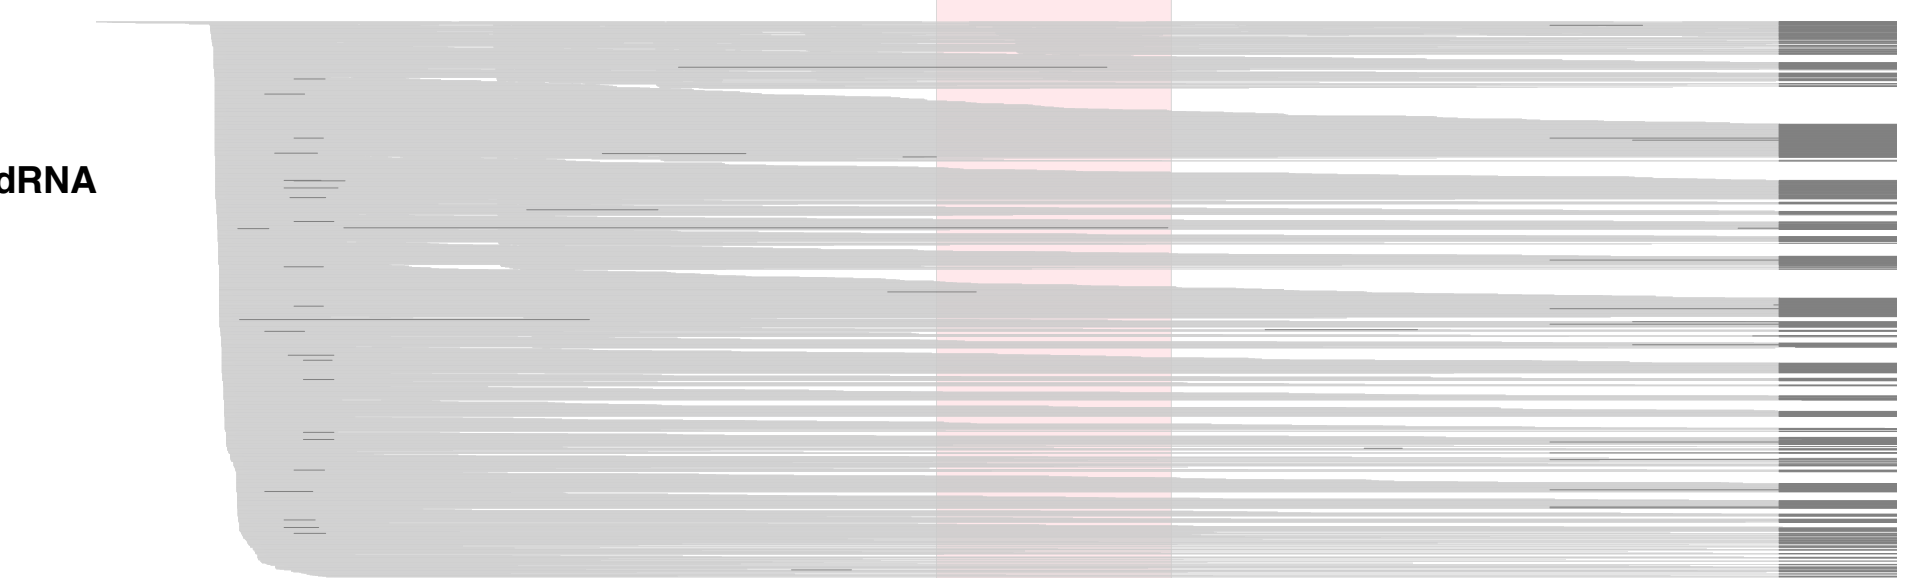

dRNA TX annotation 1:136  
1:138

chr1:28335161-28335708:+ MED18

Cell line: Hct116

Direct repeat sequence: CAGC

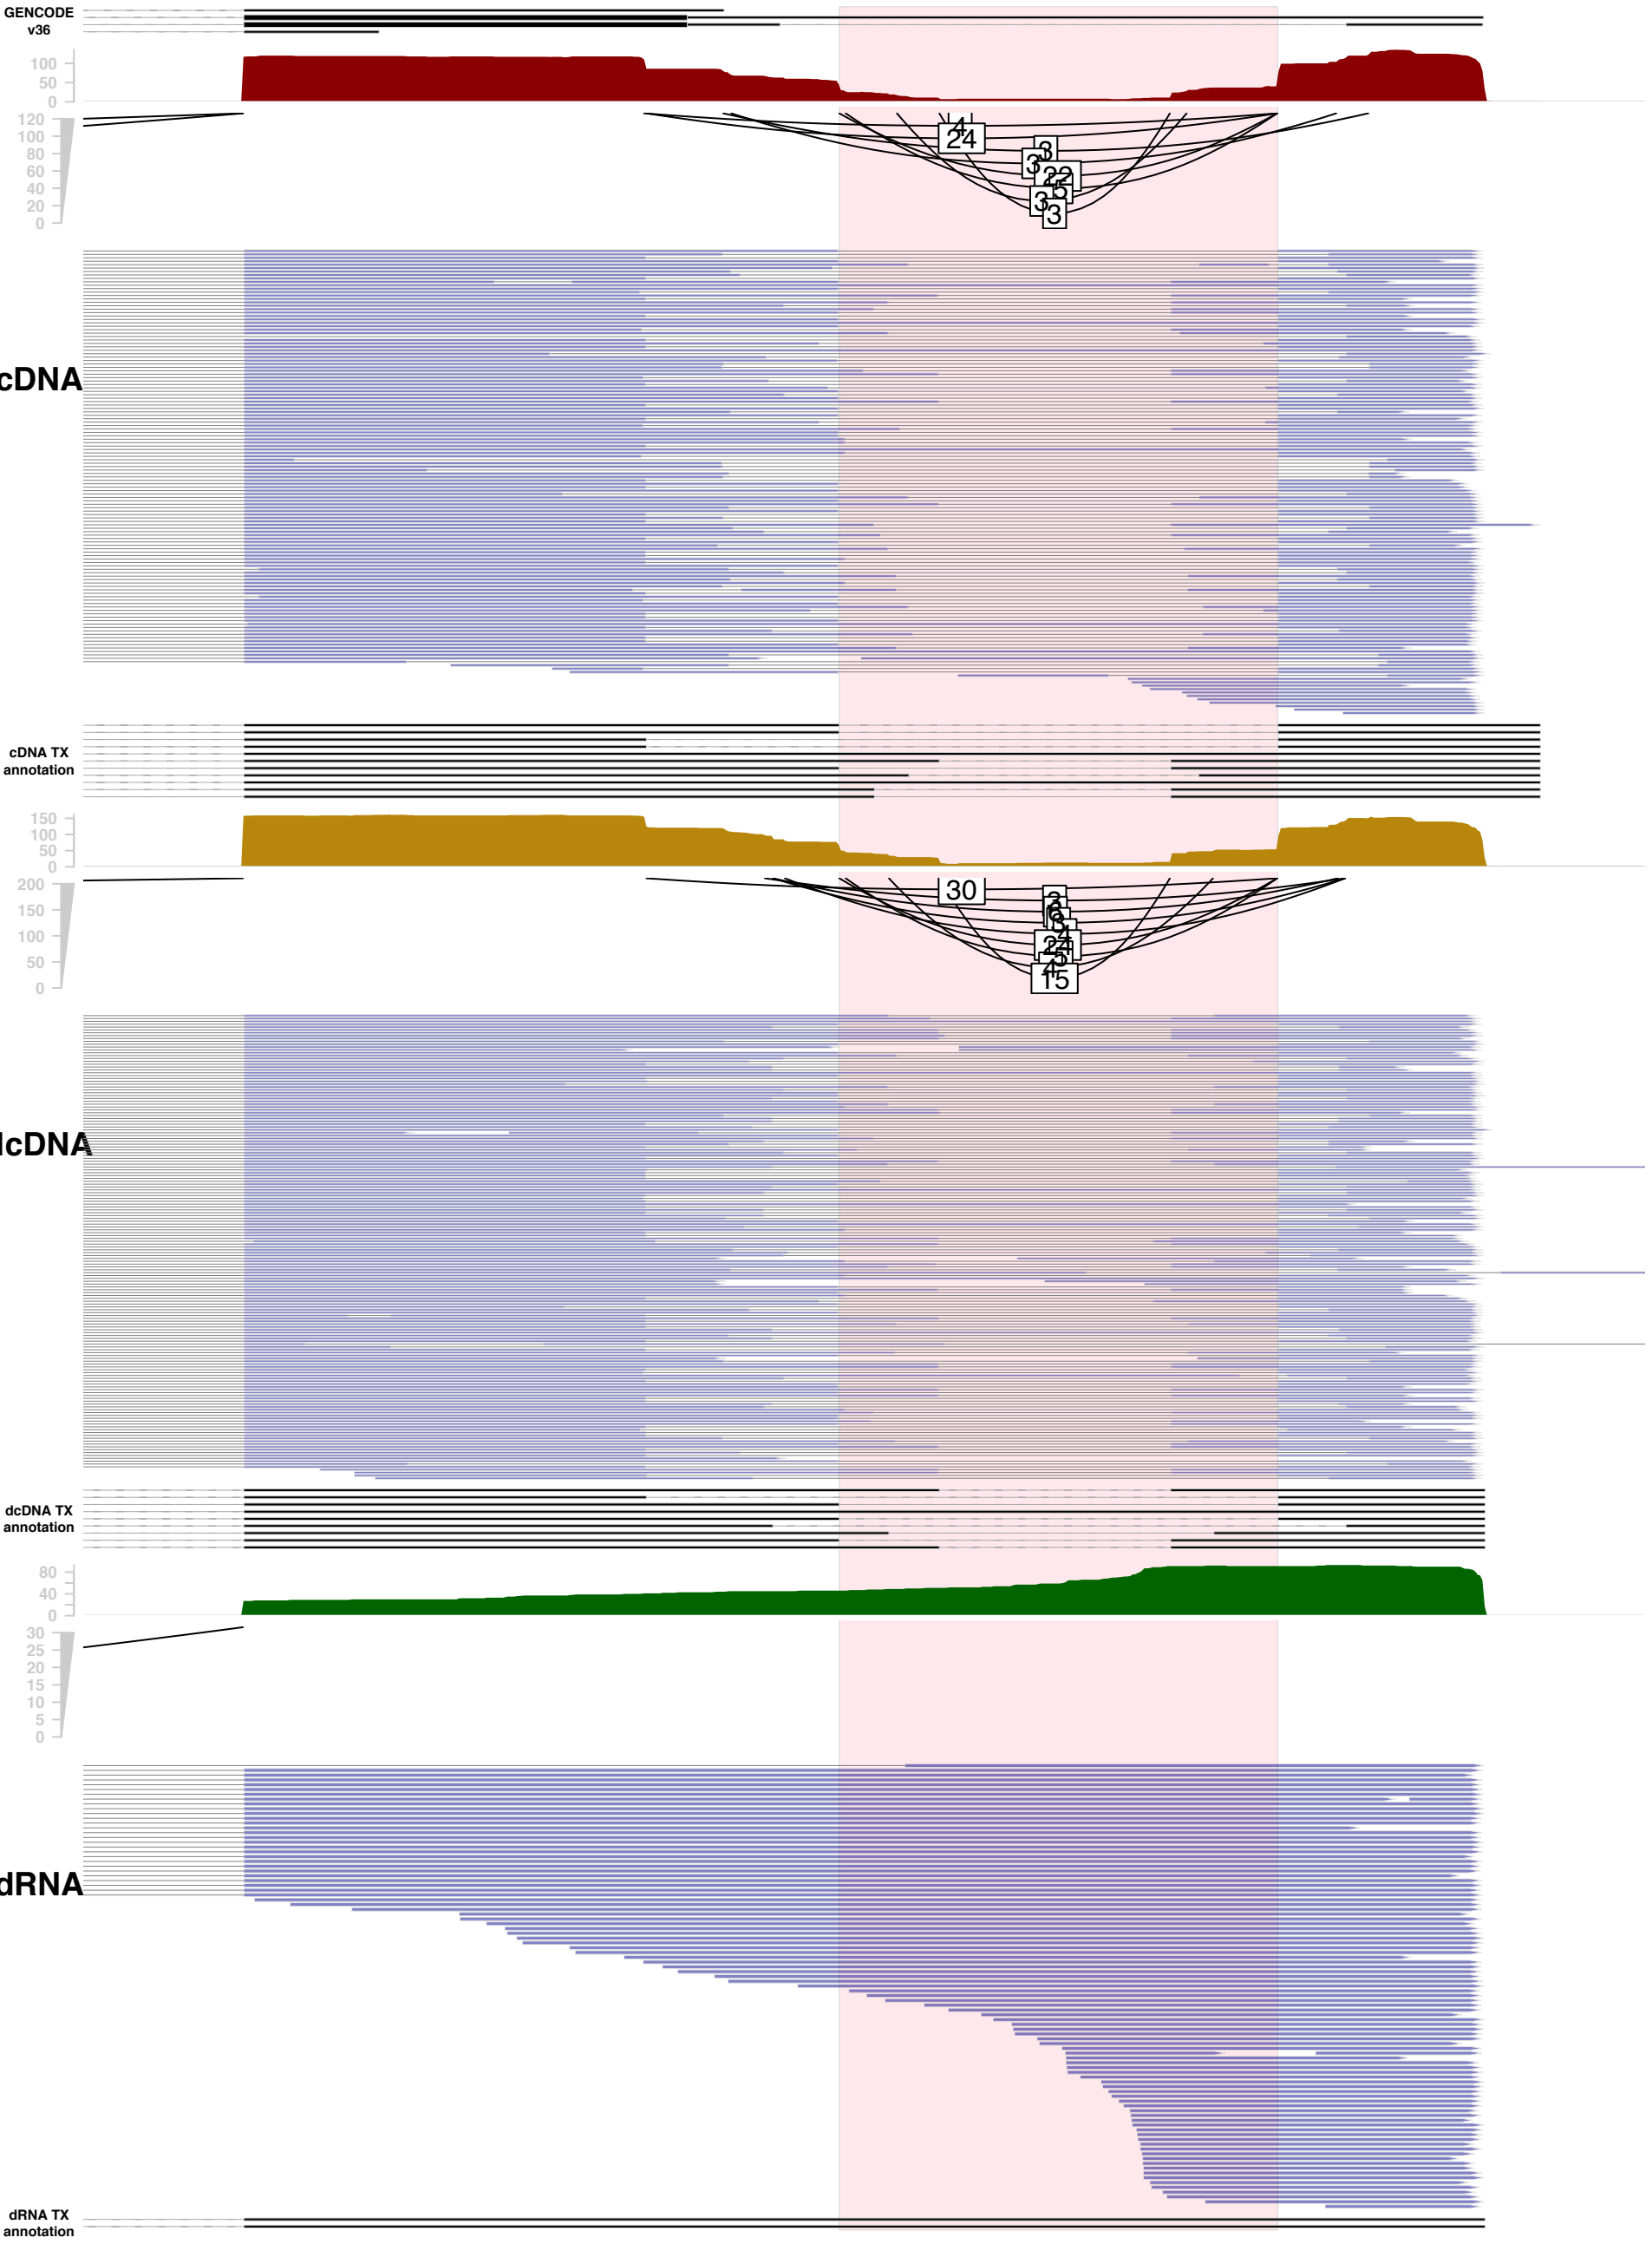

# chr5:163437659-163437758:+ CCNG1

Cell line: Hct116

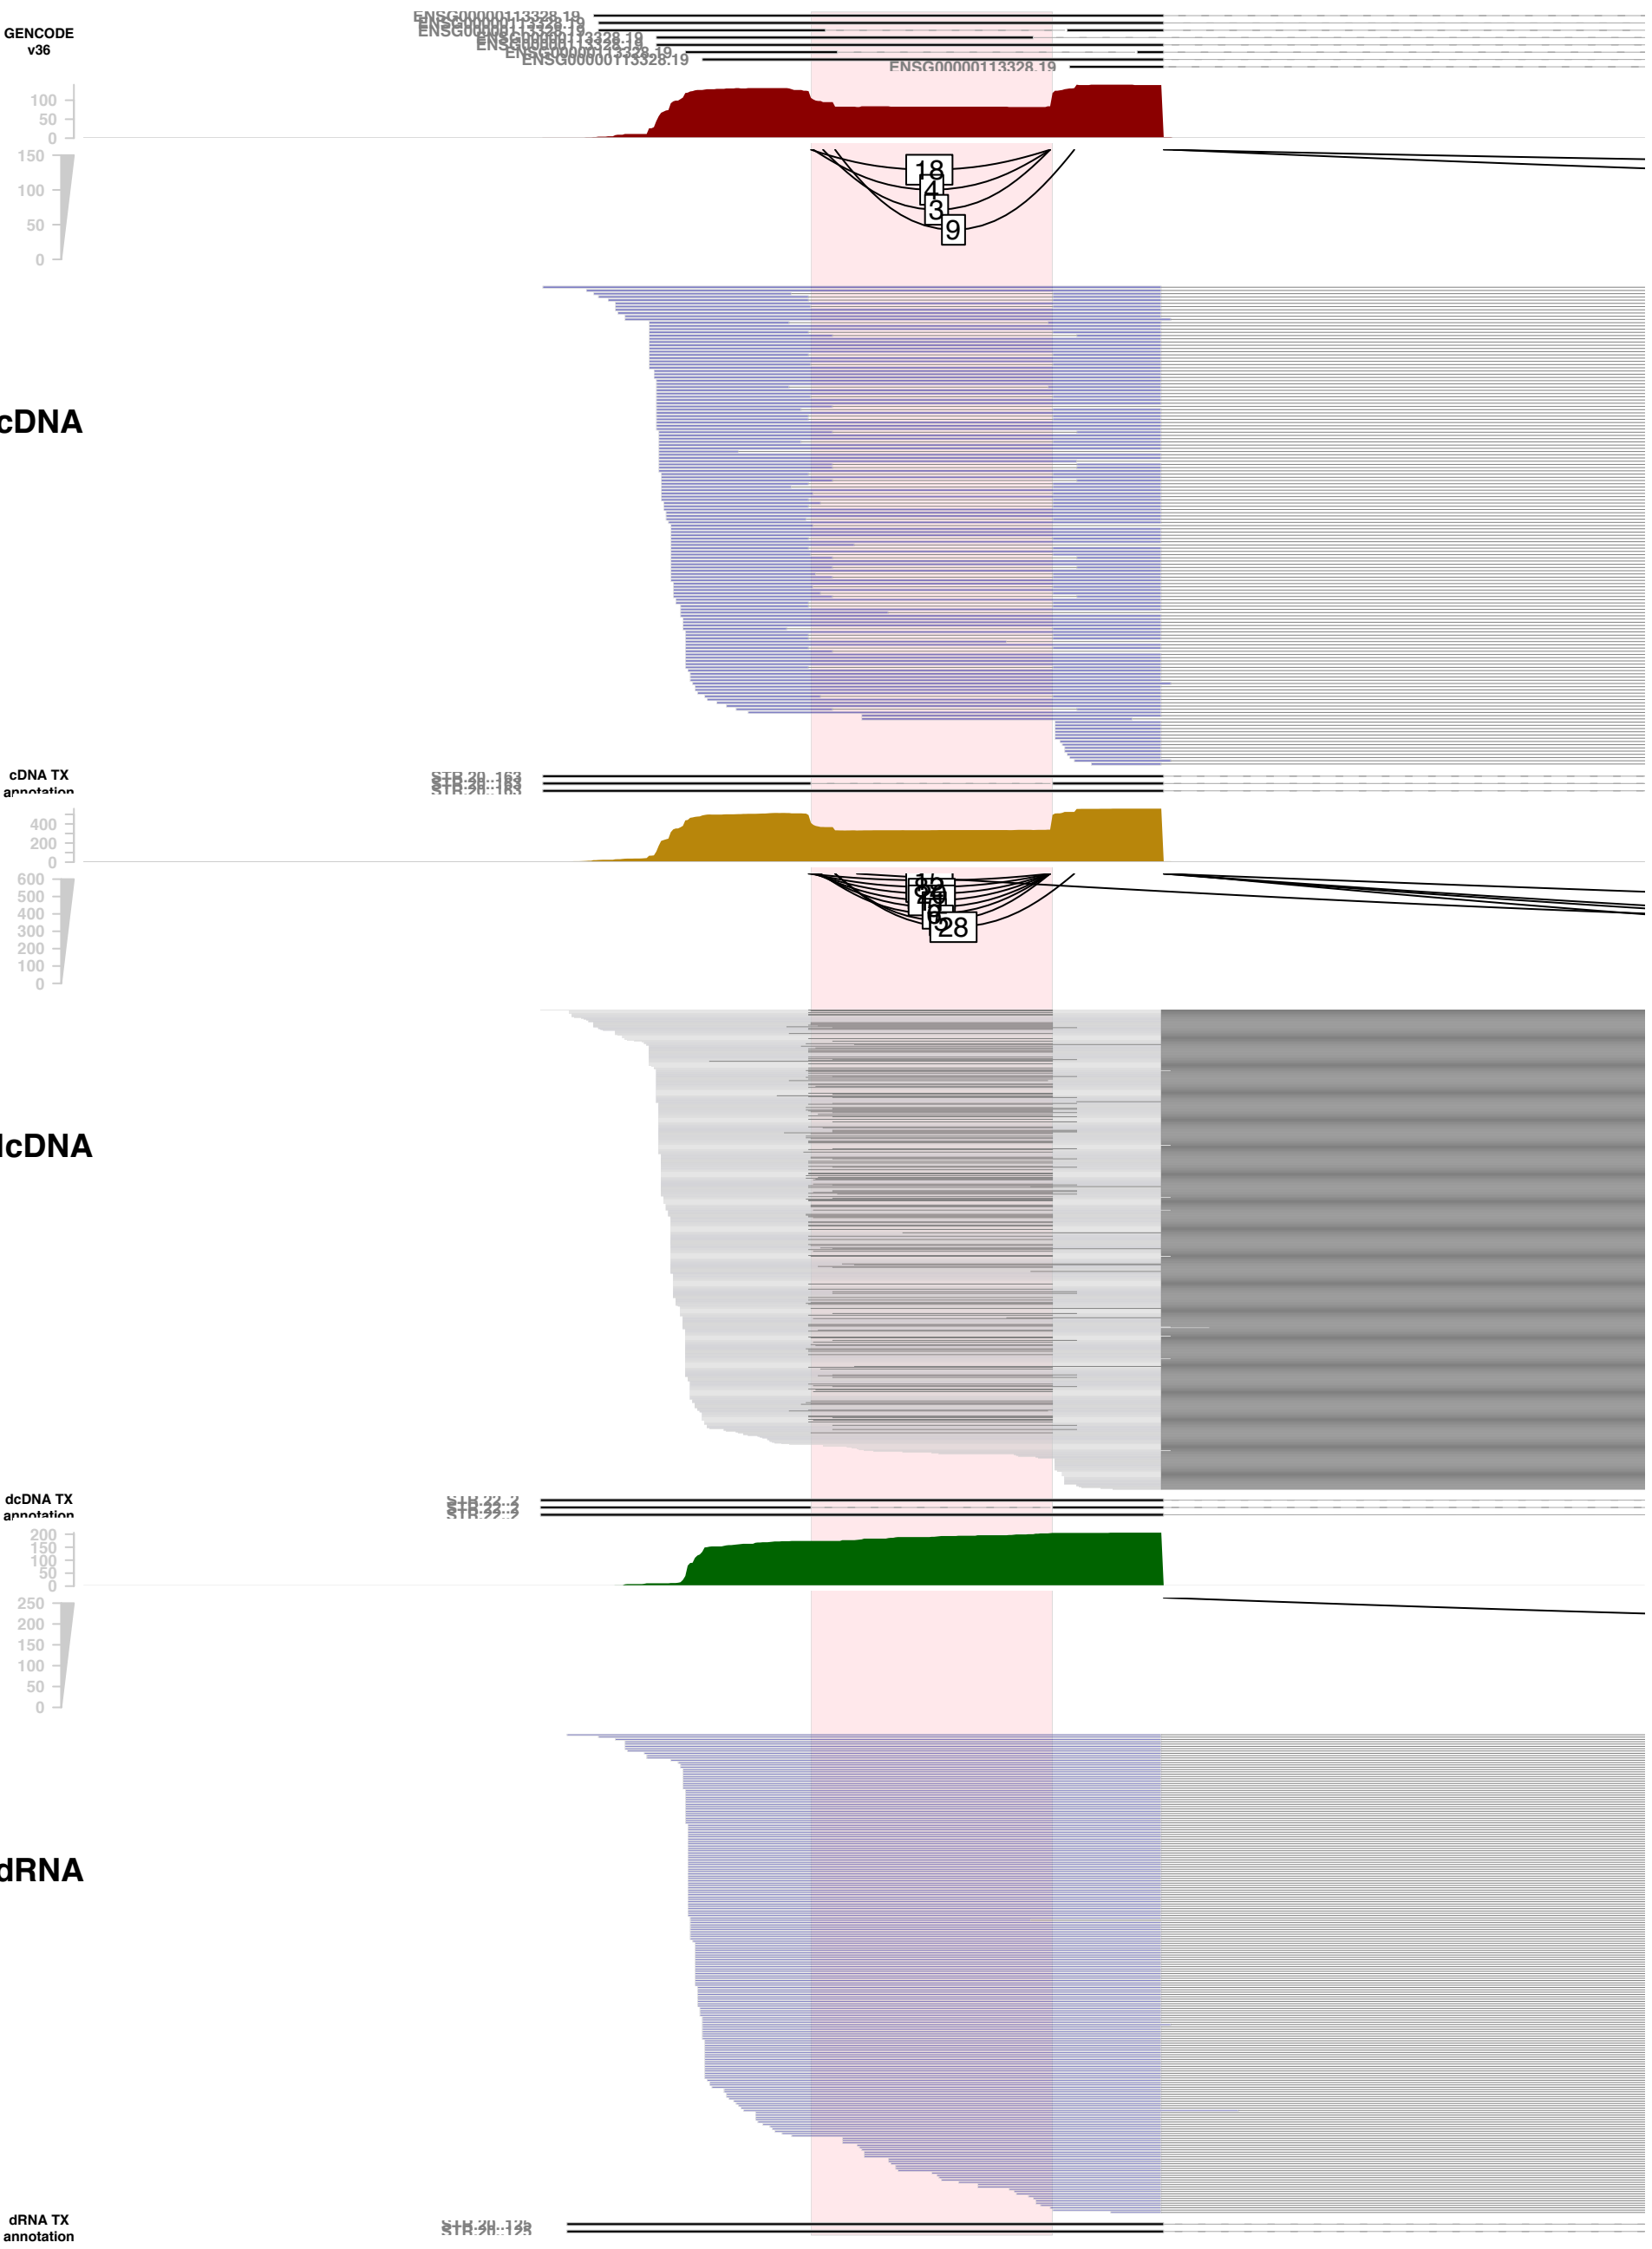

chr6:170584410-170584525:- PDCD2

Cell line: Hct116

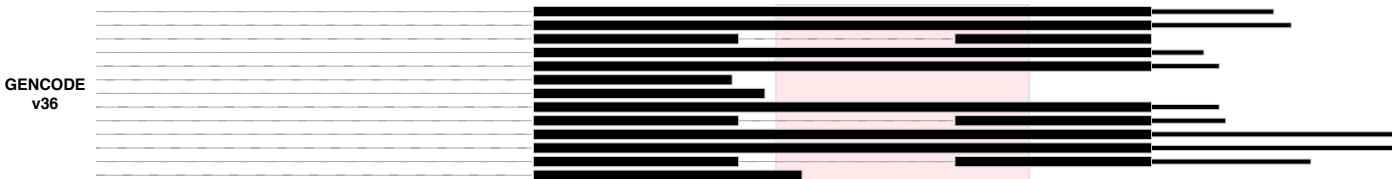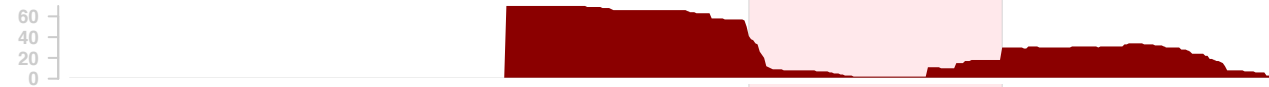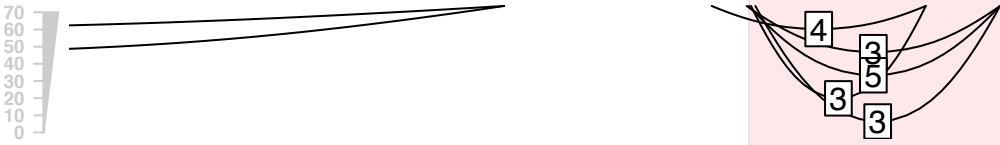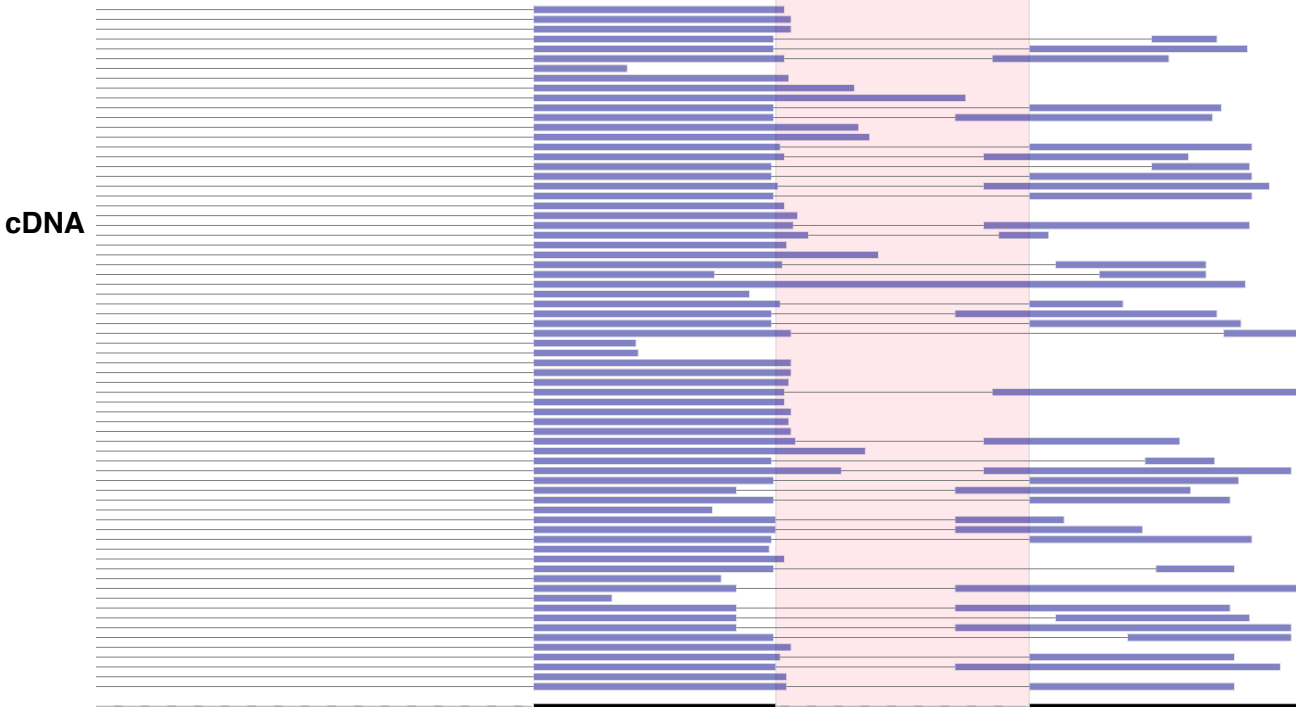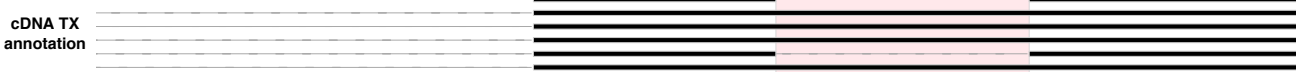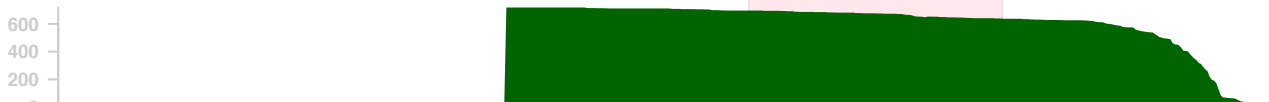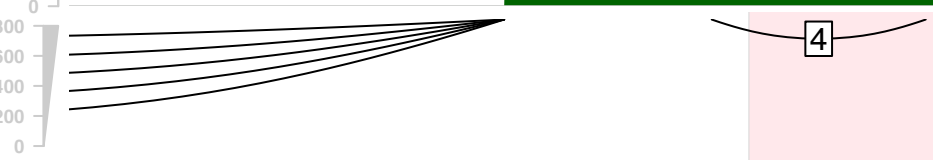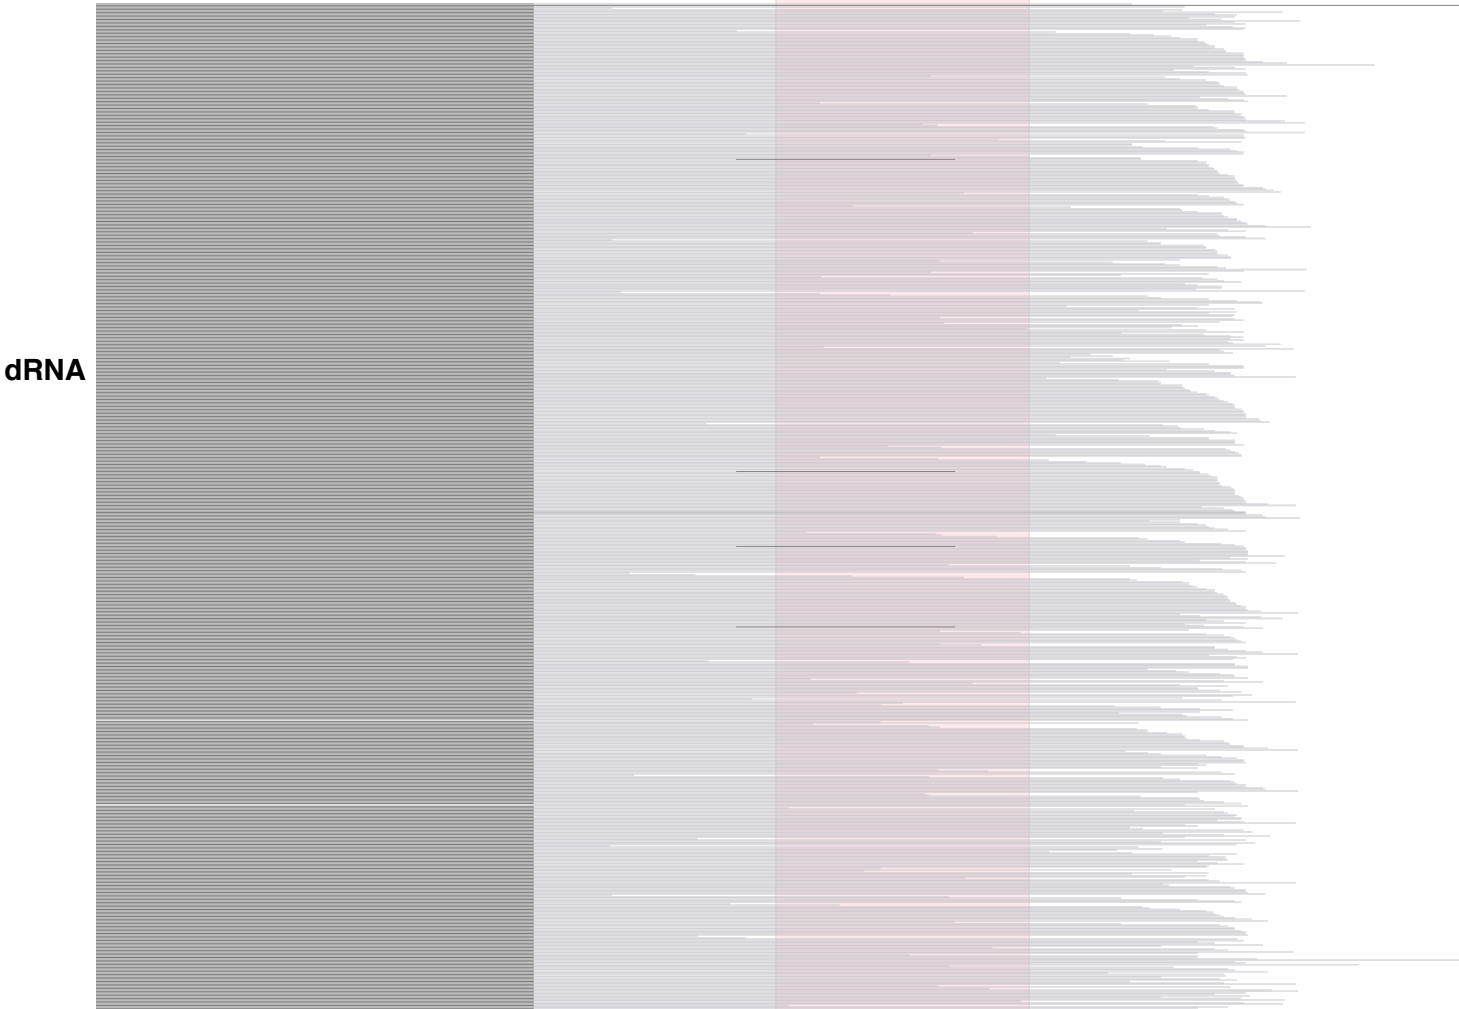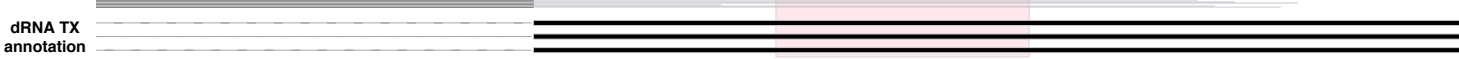

chr7:157139165-157139221:+ UBE3C

Cell line: Hct116

Direct repeat sequence: GCCC

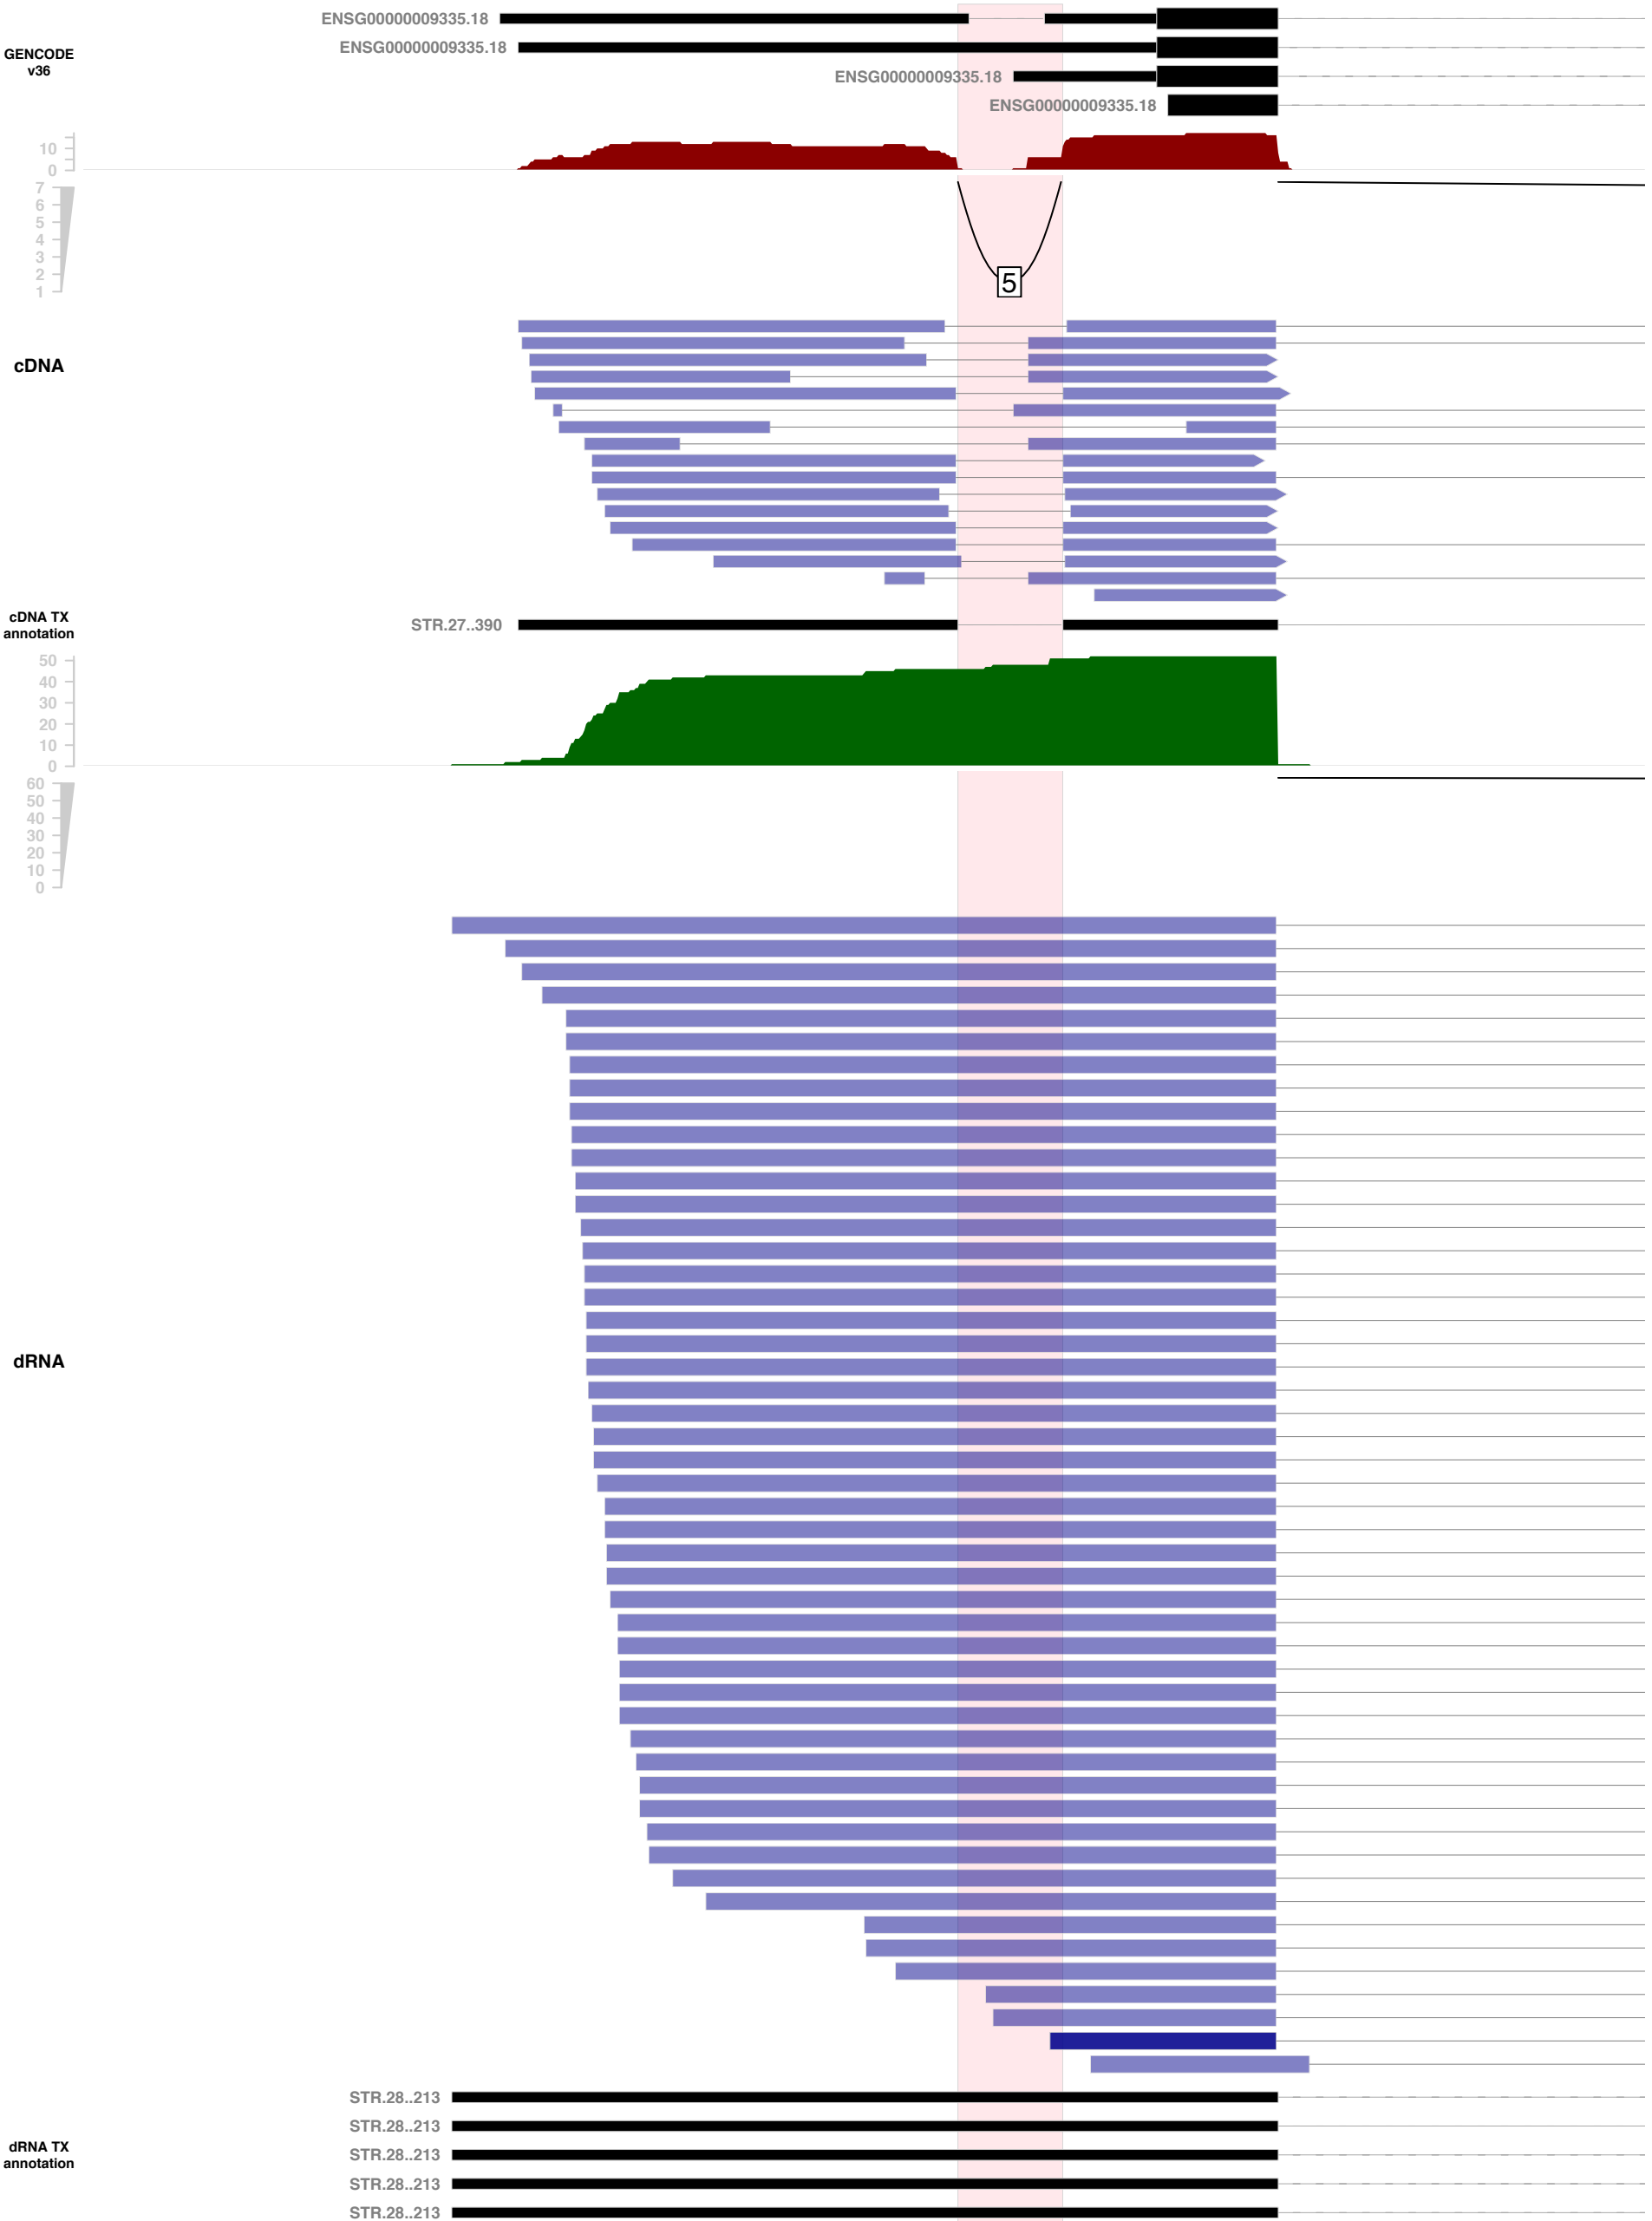

chr8:47976979-47977736:+ MCM4

Cell line: Hct116

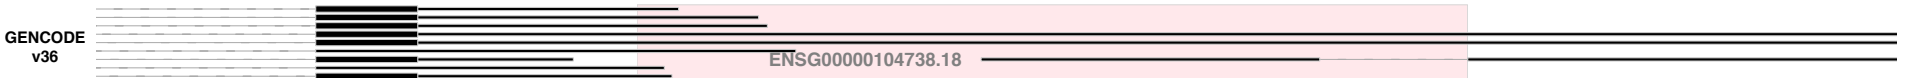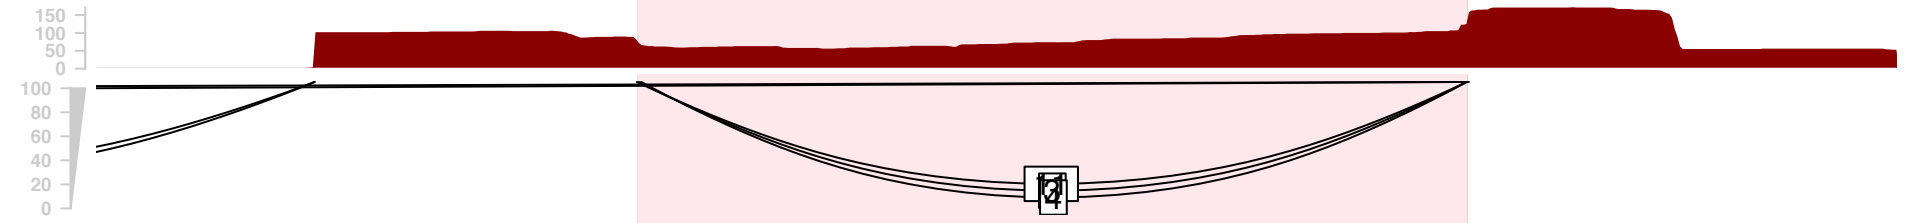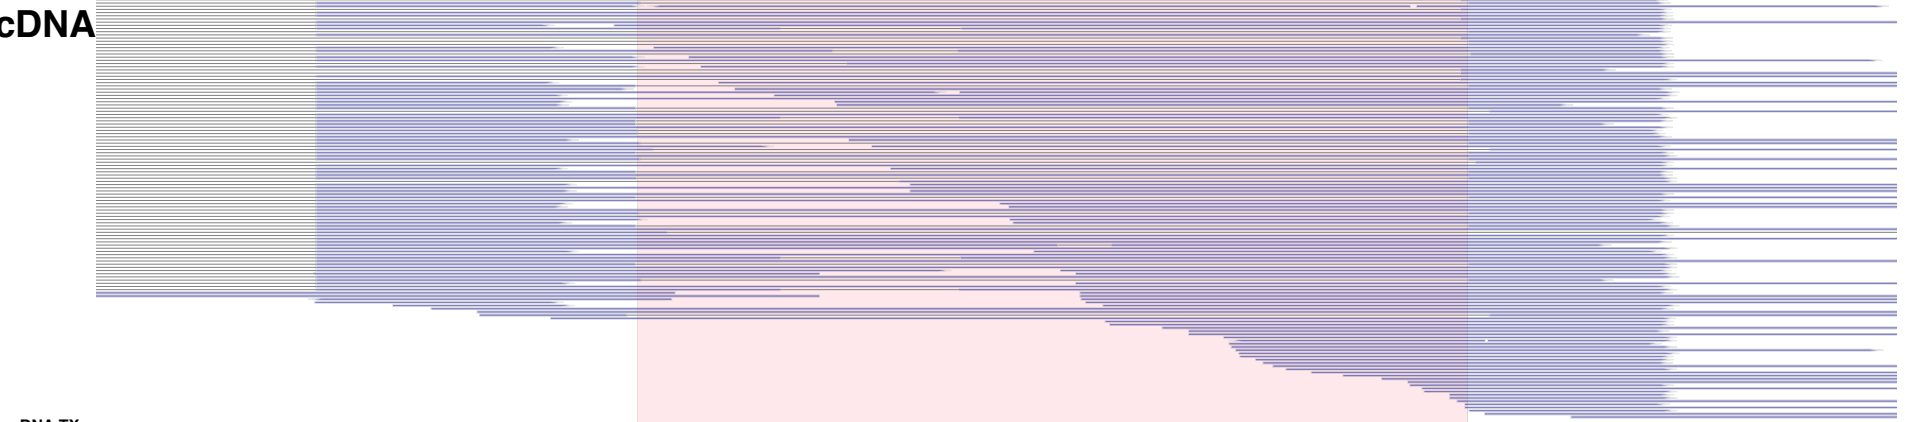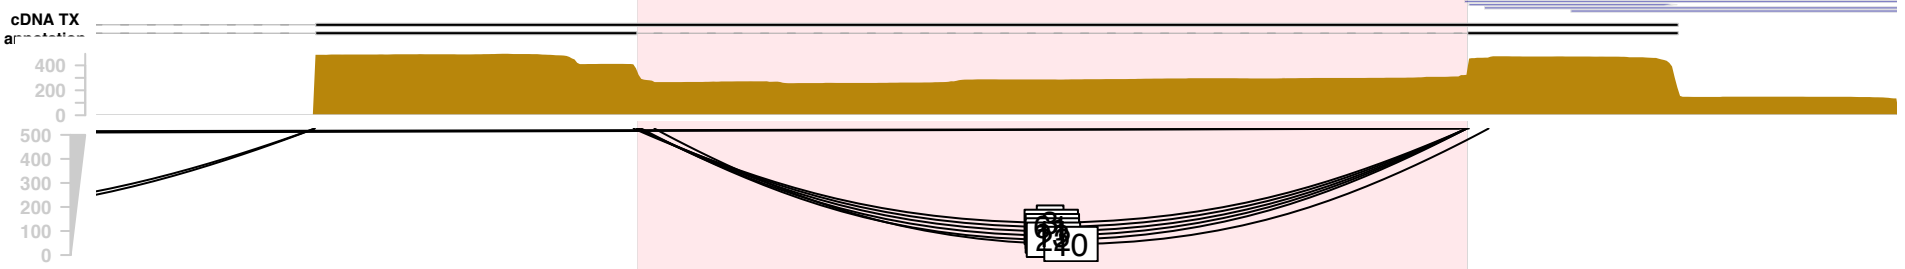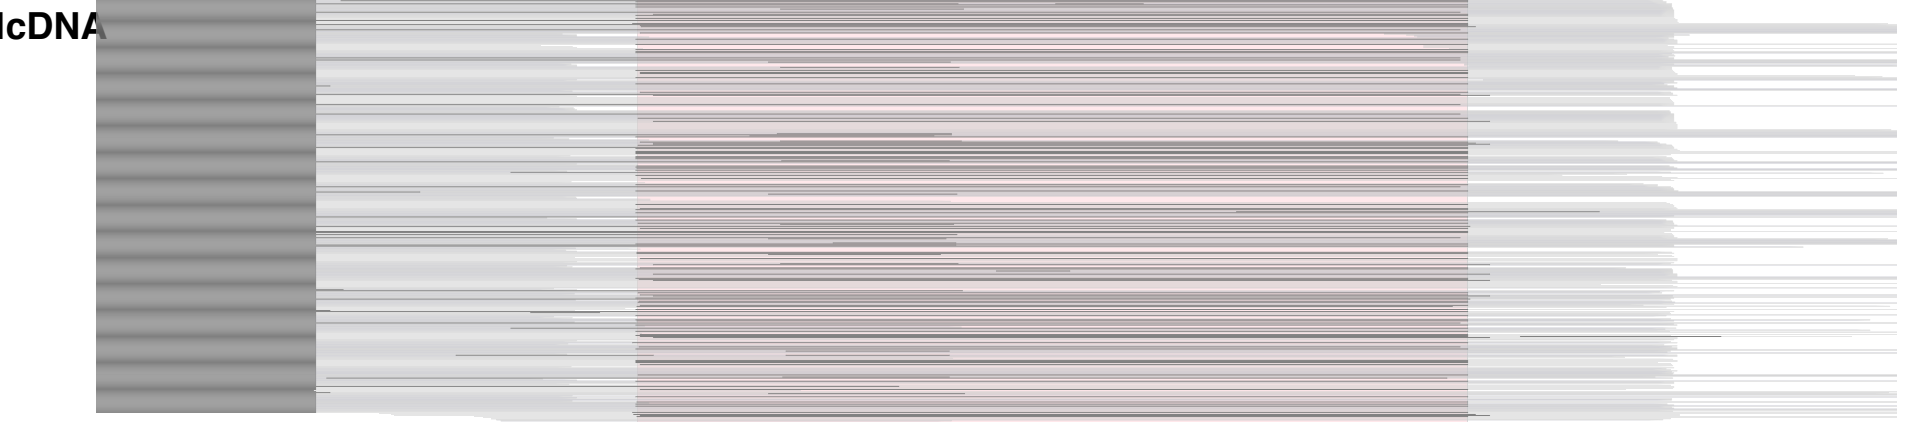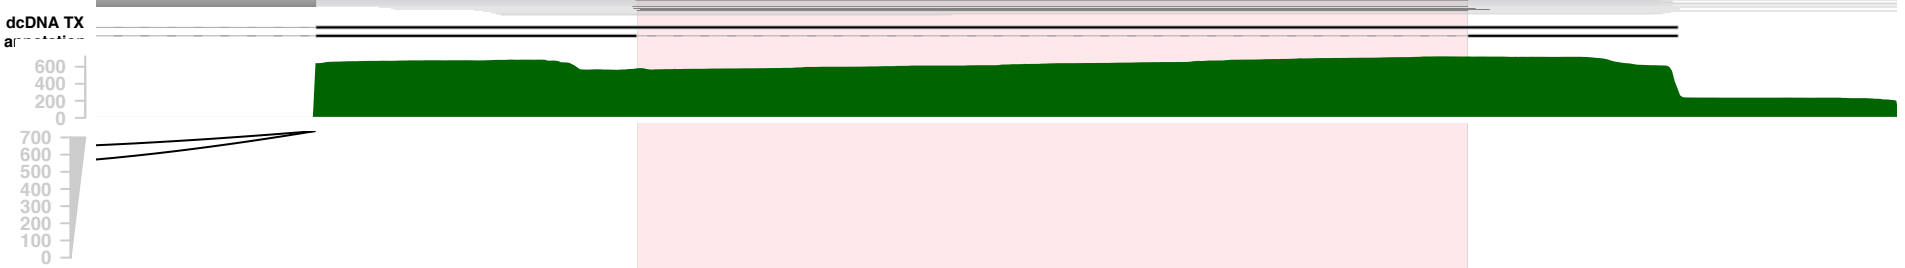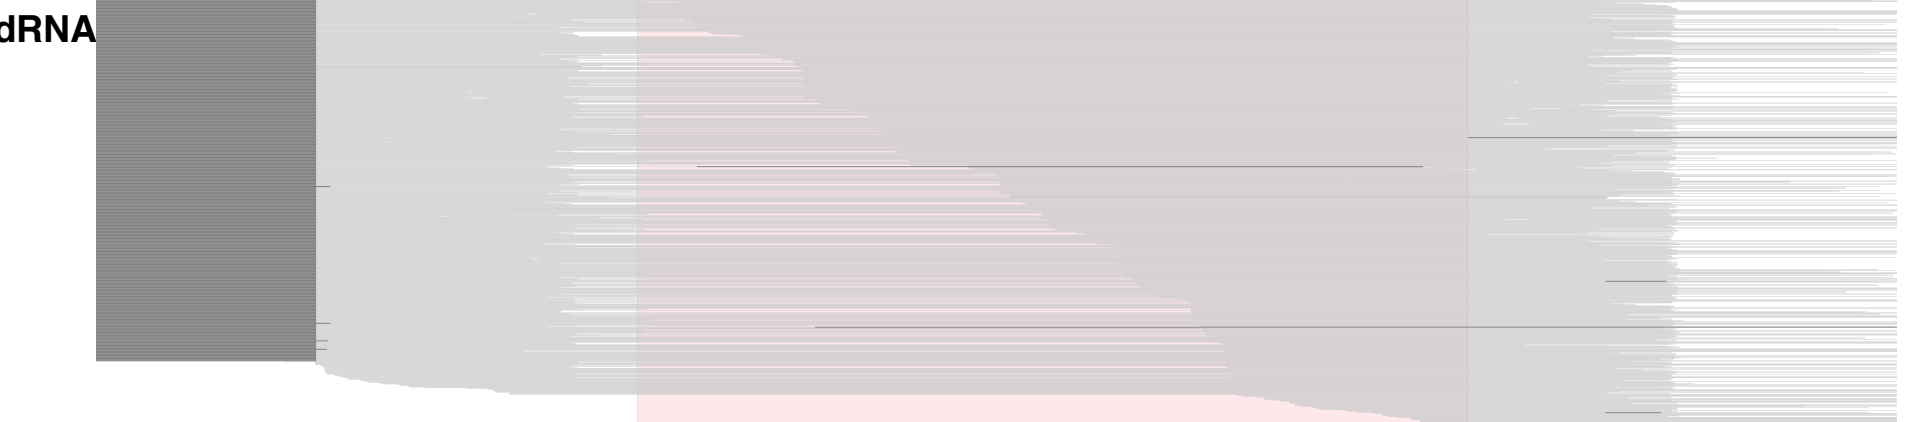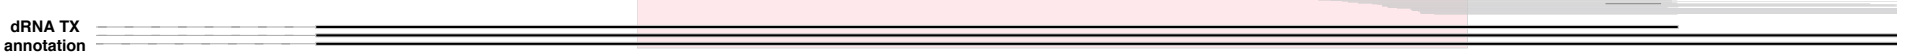



chr14:31447249-31447389:- RP11-176H8.1,DTD2

Cell line: Hct116

Direct repeat sequence: CAGCAC

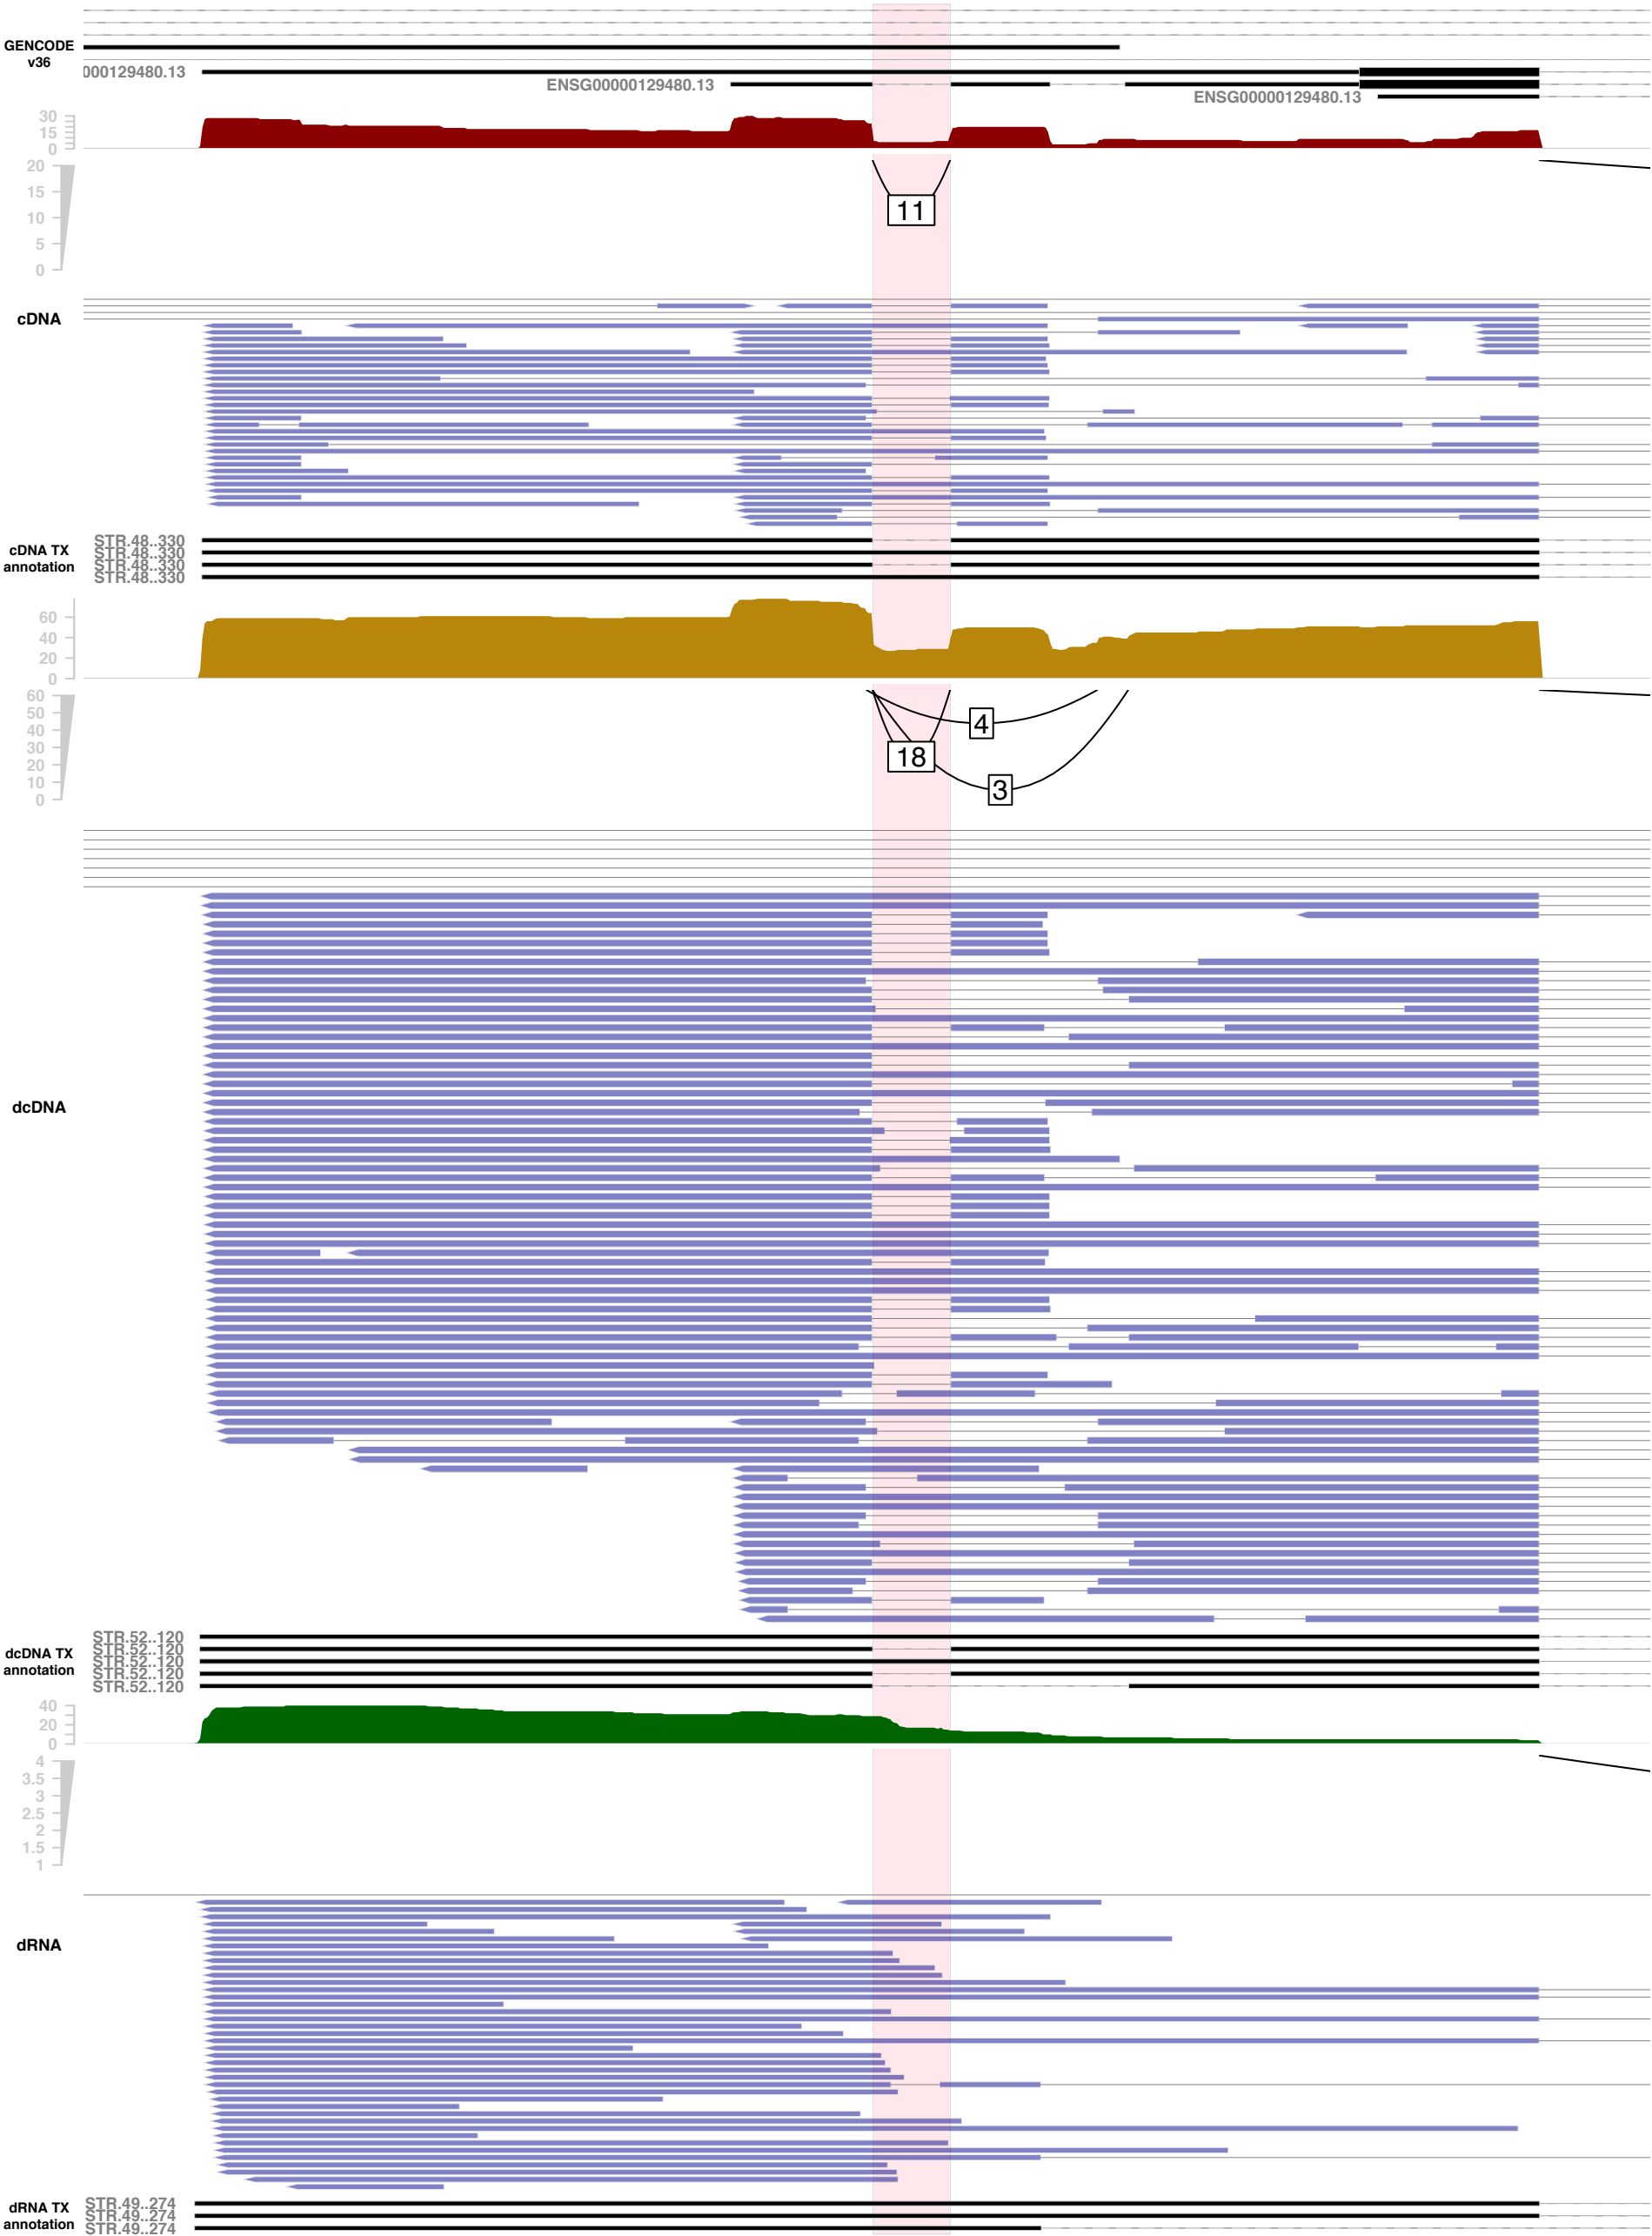



chr19:35746853-35746910:+ PSENEN,AC002398.9

Cell line: Hct116

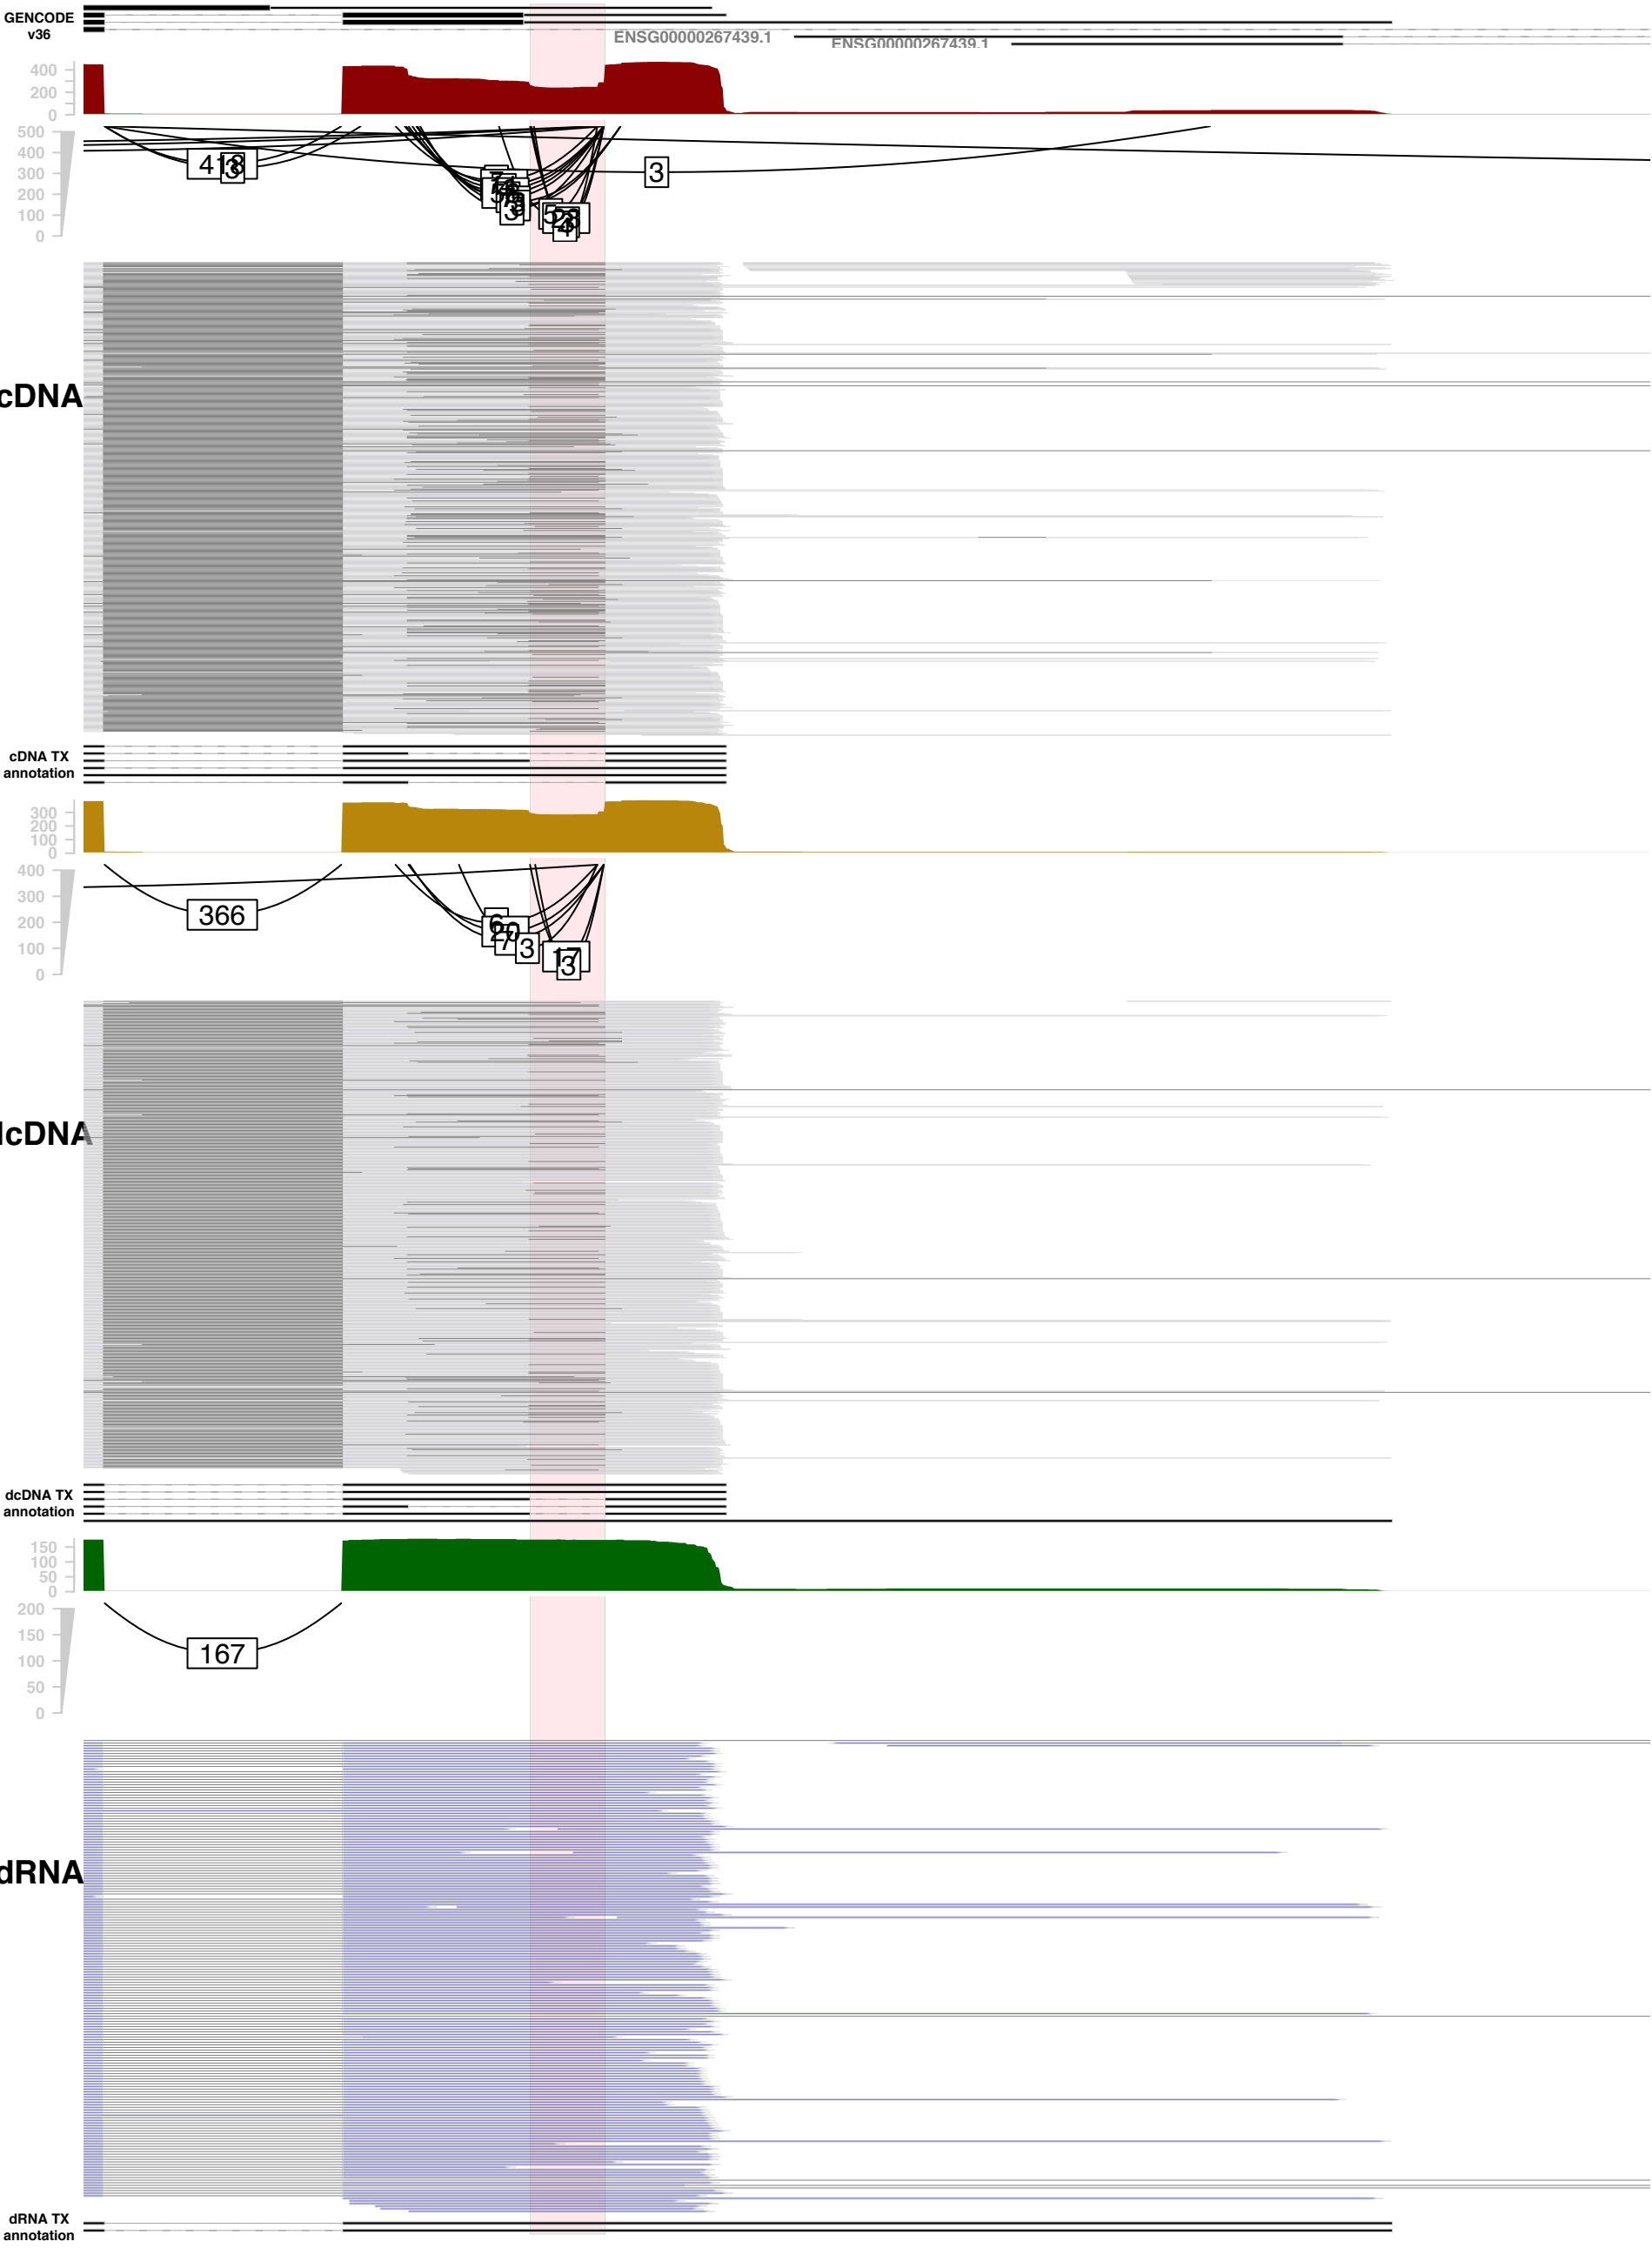

chr20:58891551-58891720:+ GNAS

Cell line: Hct116

Direct repeat sequence: CCGCC

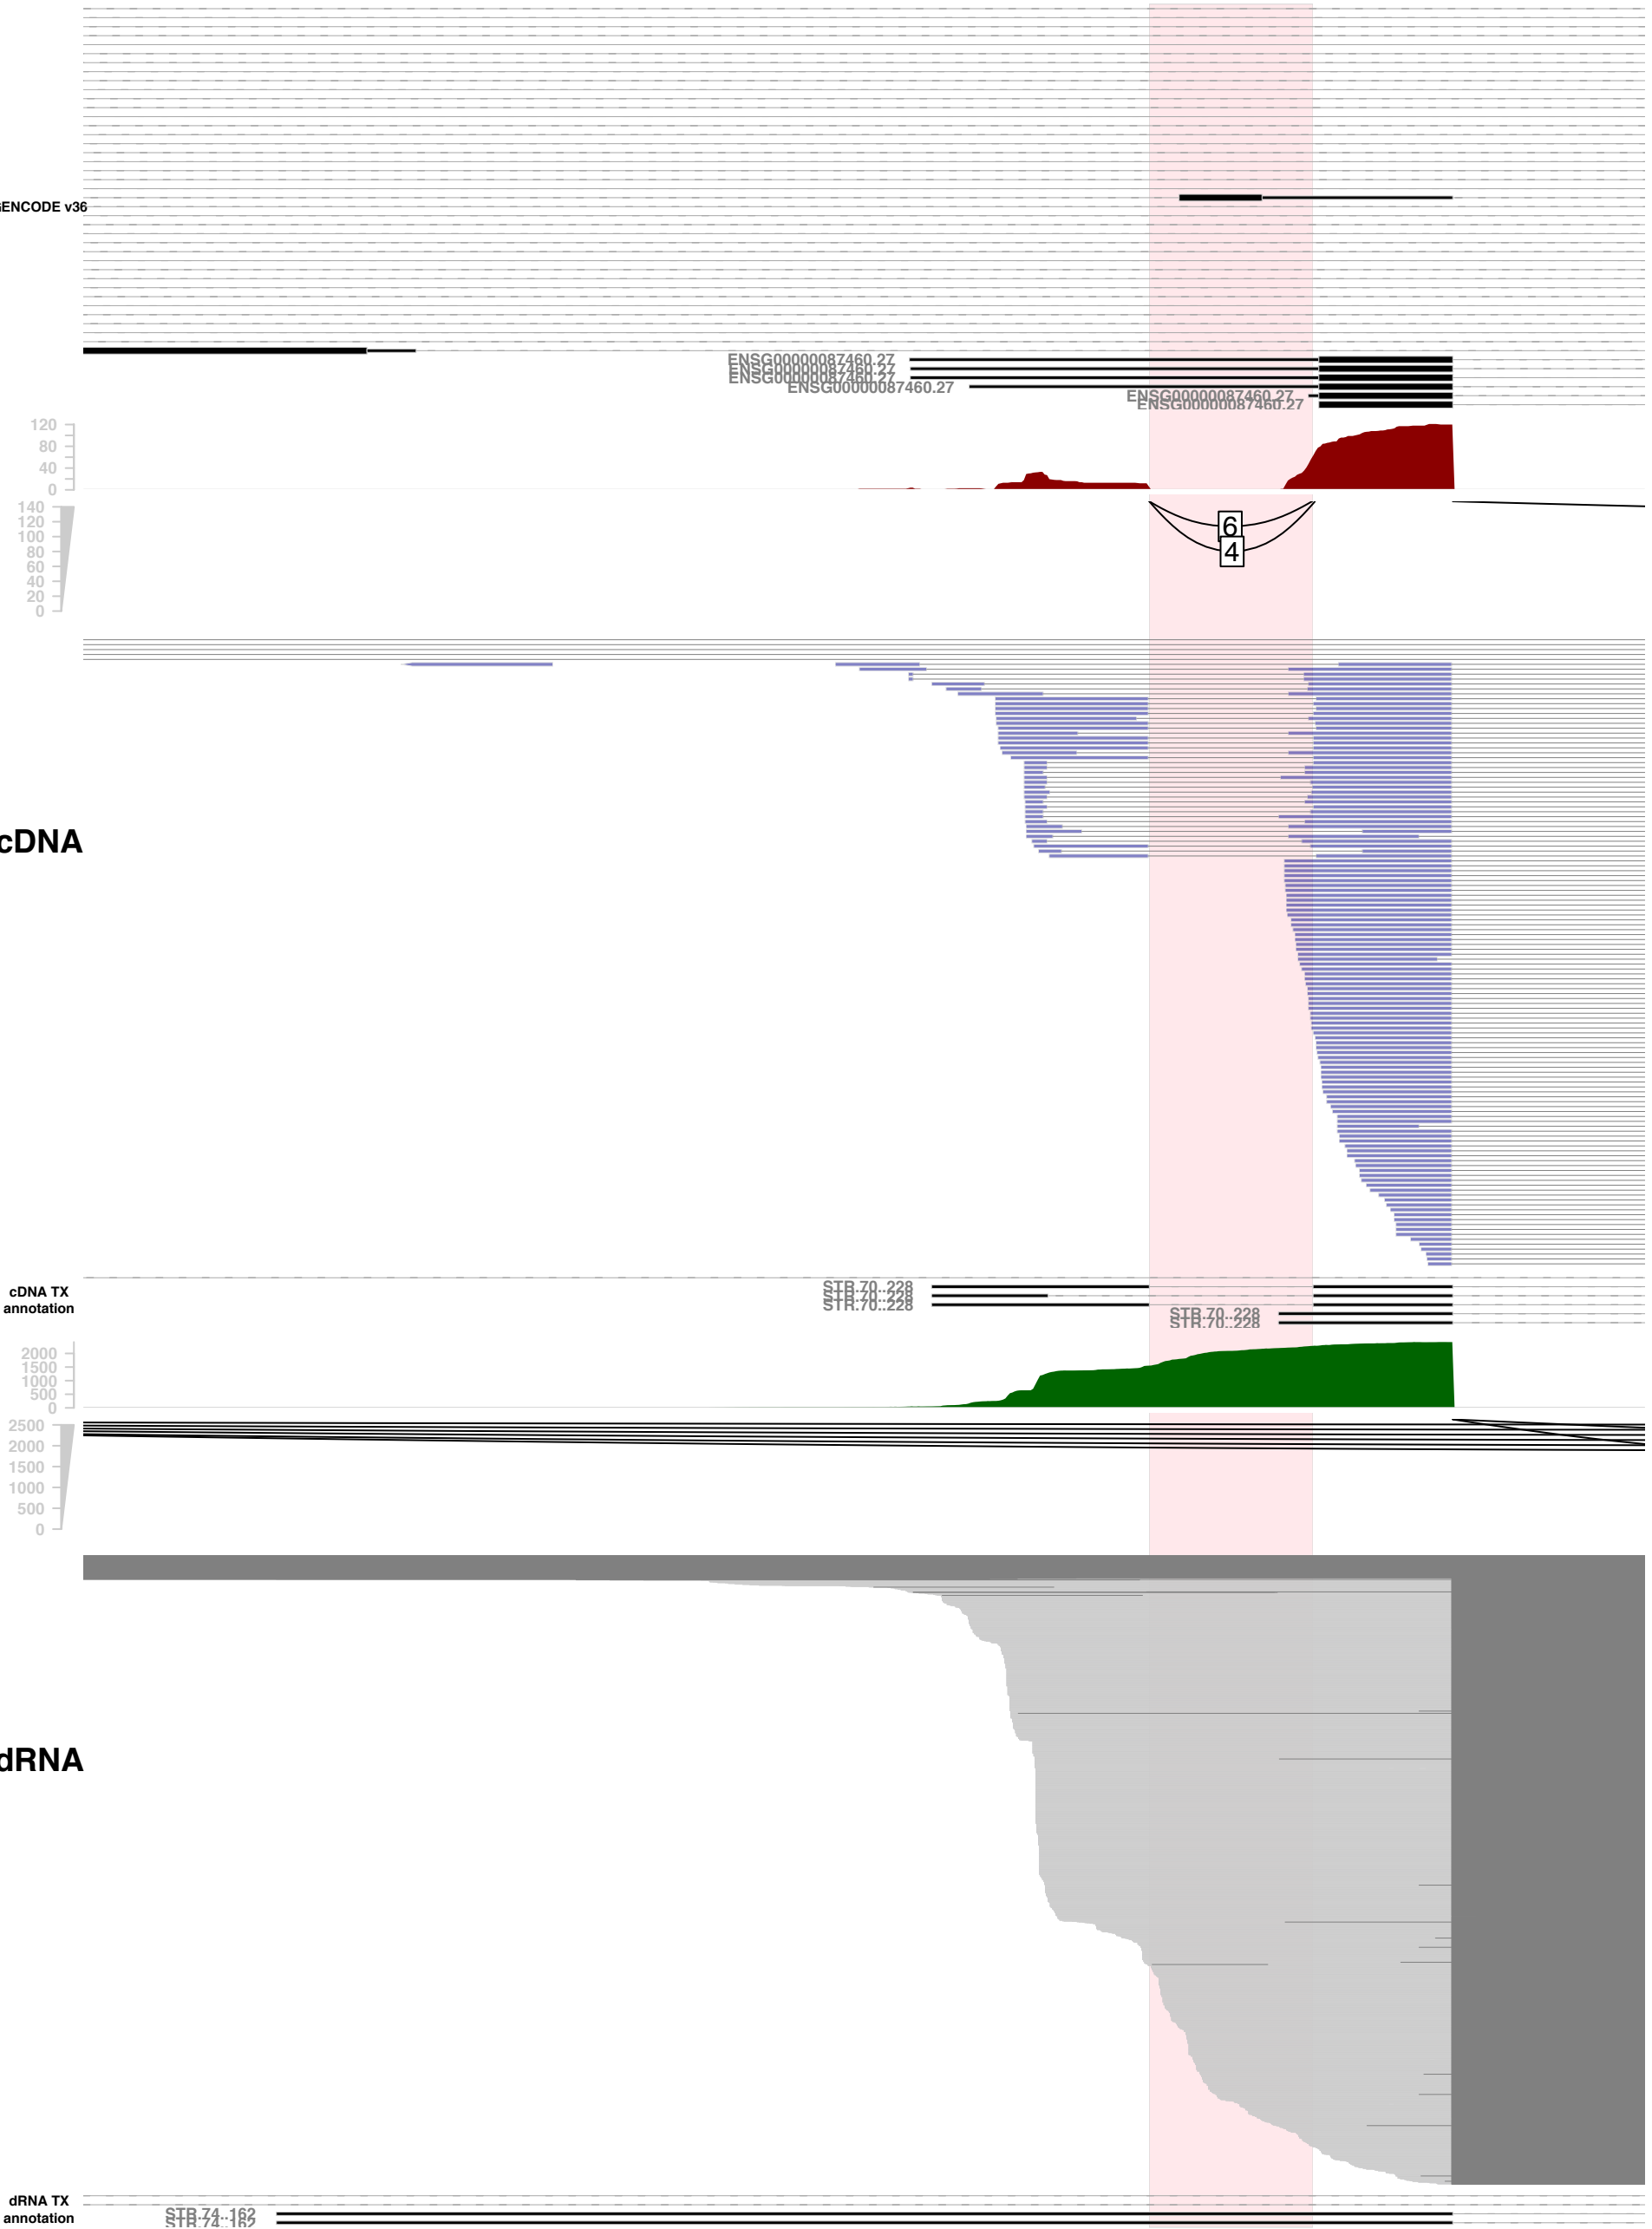

chr22:37807089-37807354:+ H1FO

Cell line: Hct116

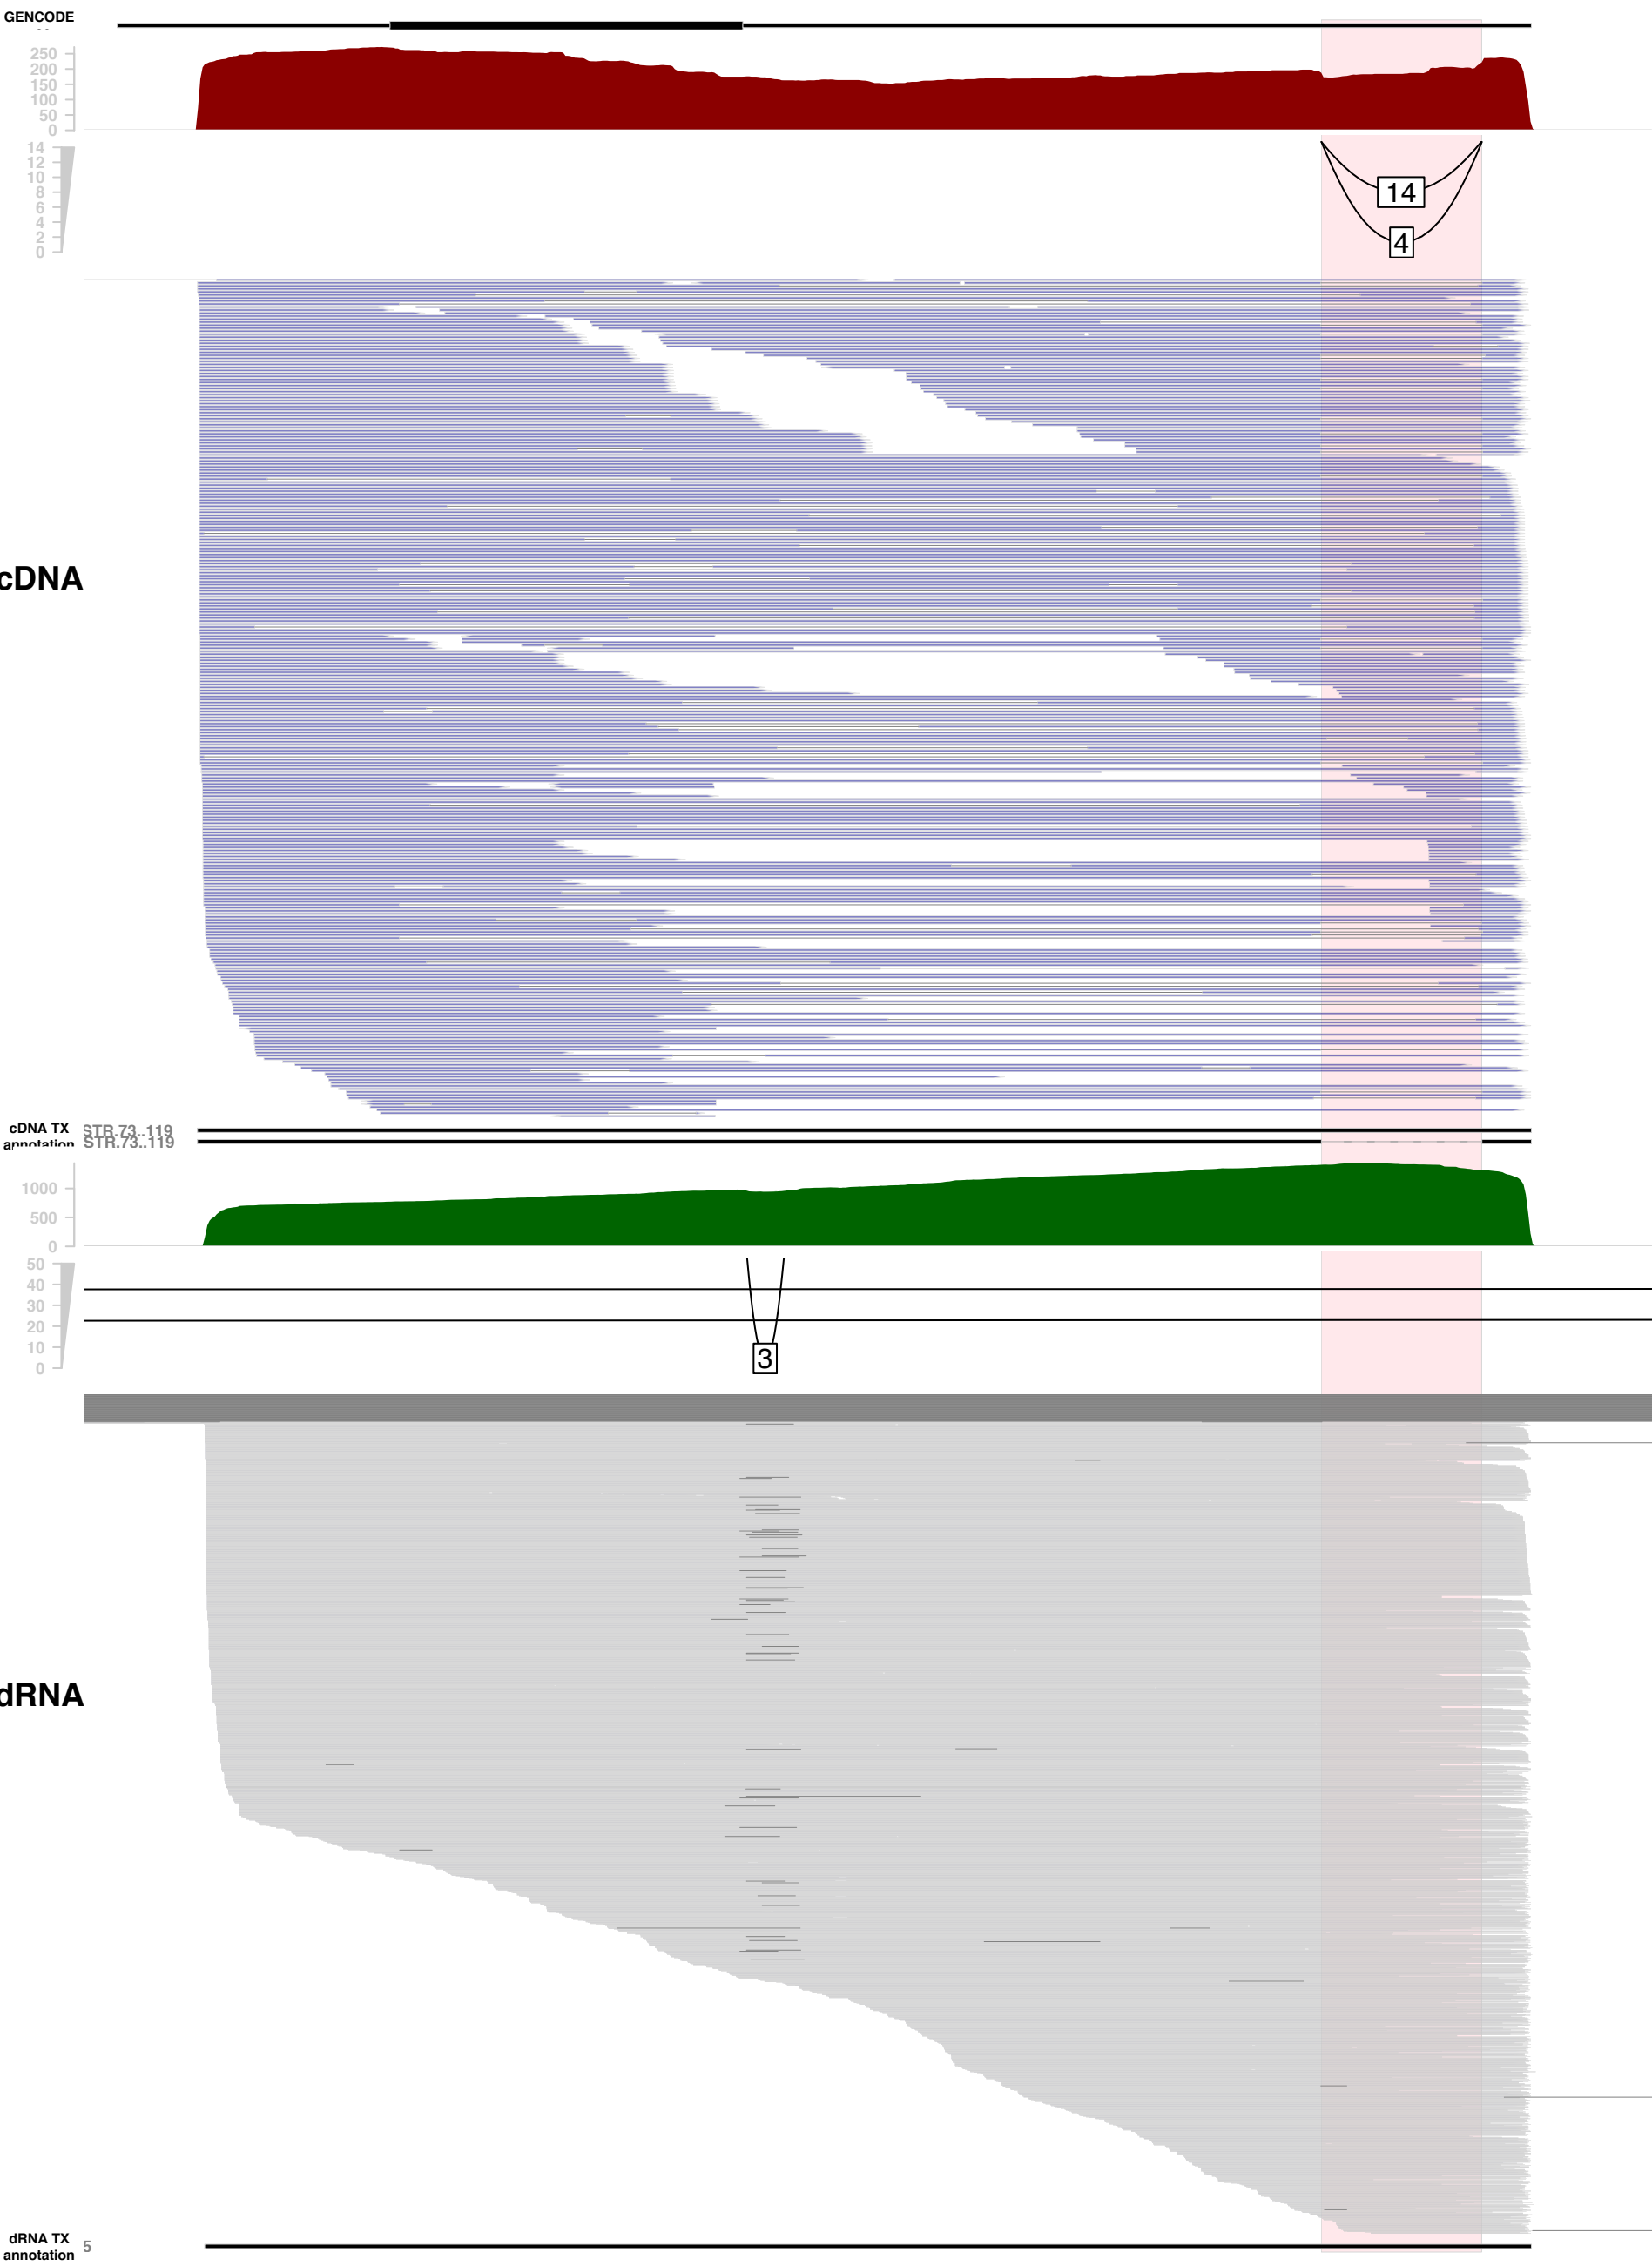

chr16:69167124-69168881:+ UTP4

Cell line: Hct116

Direct repeat sequence: ATGA

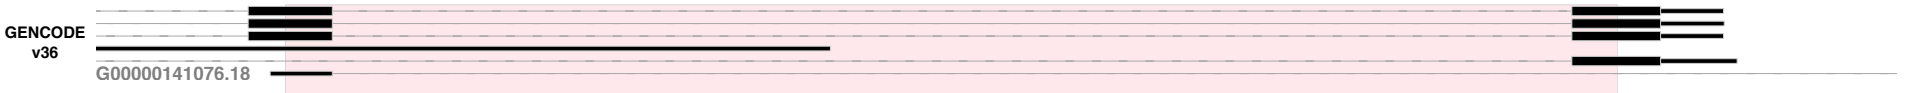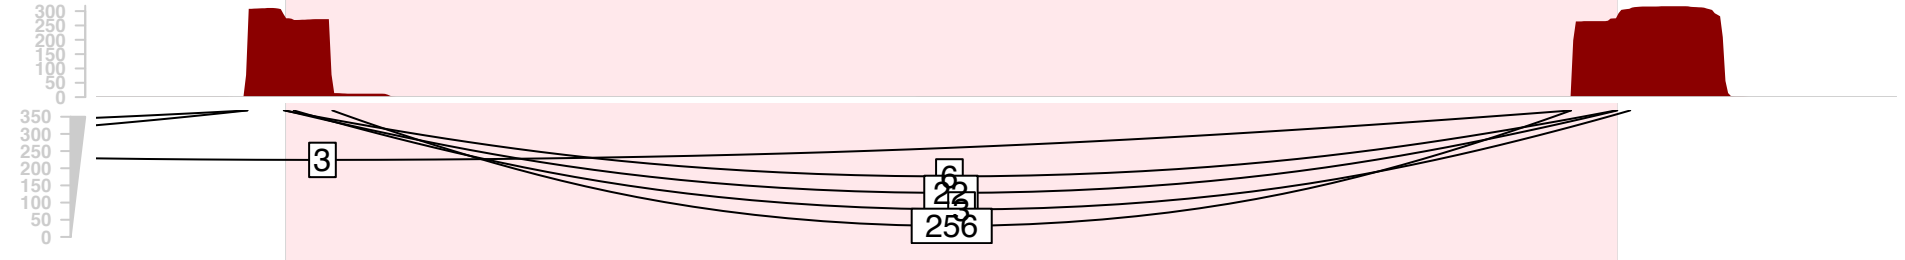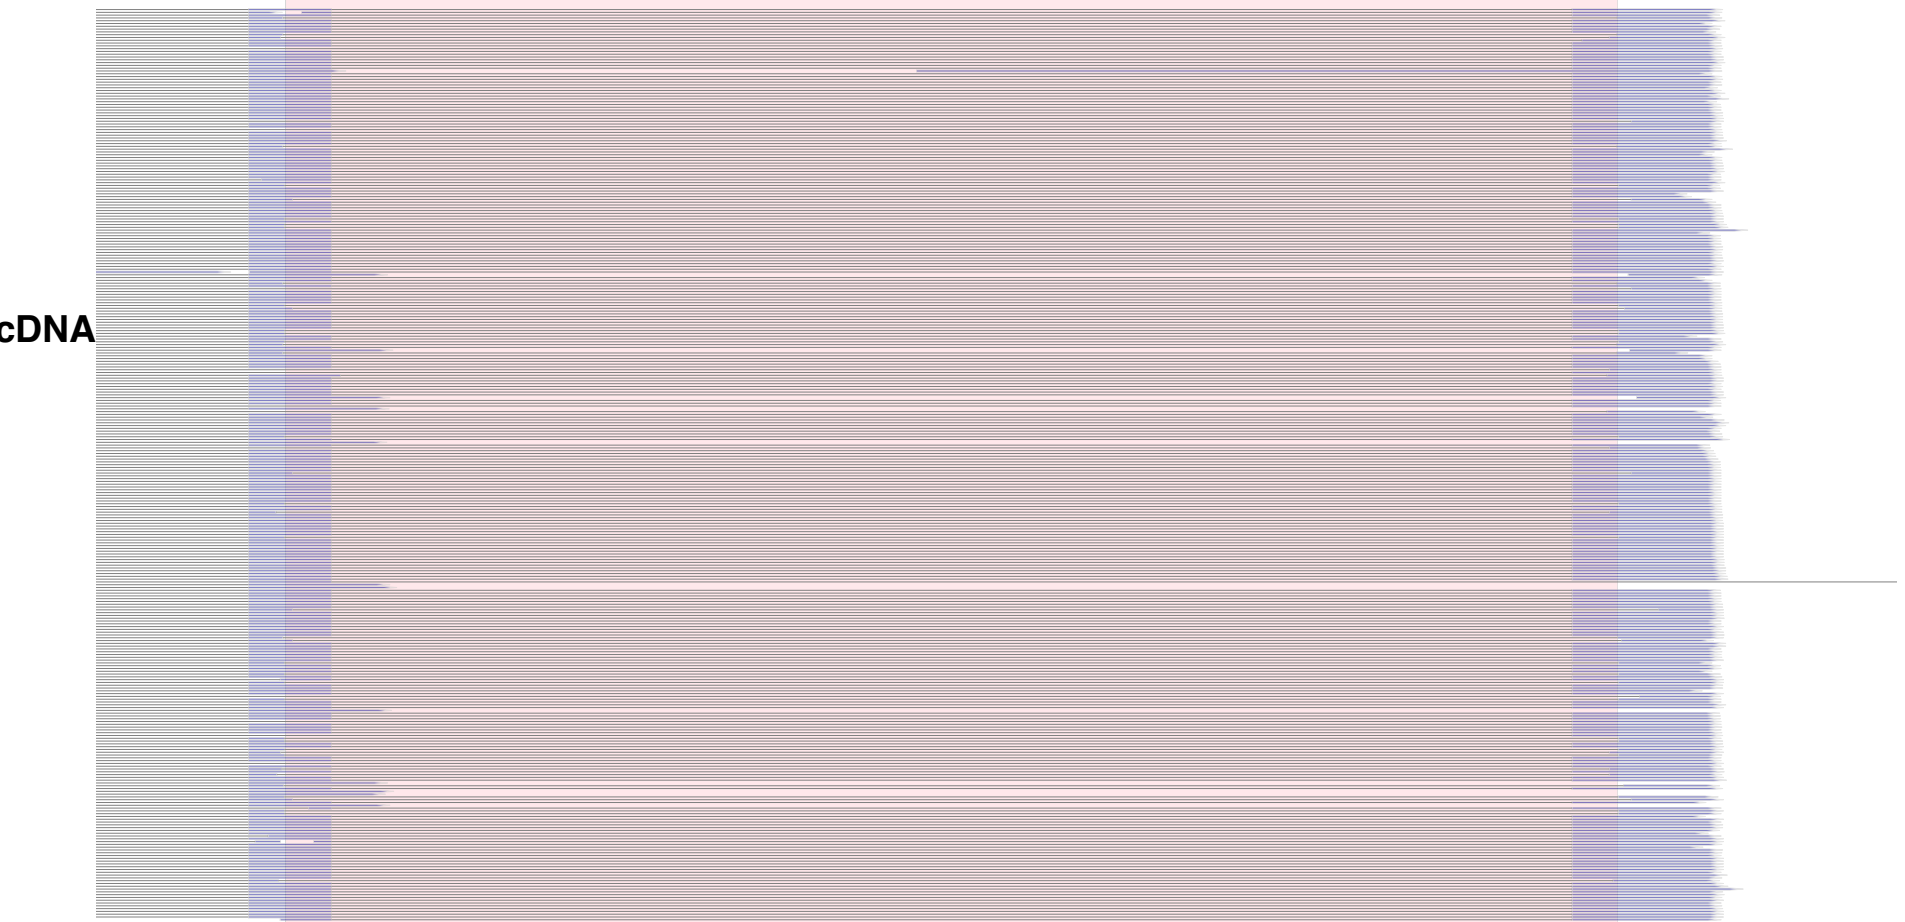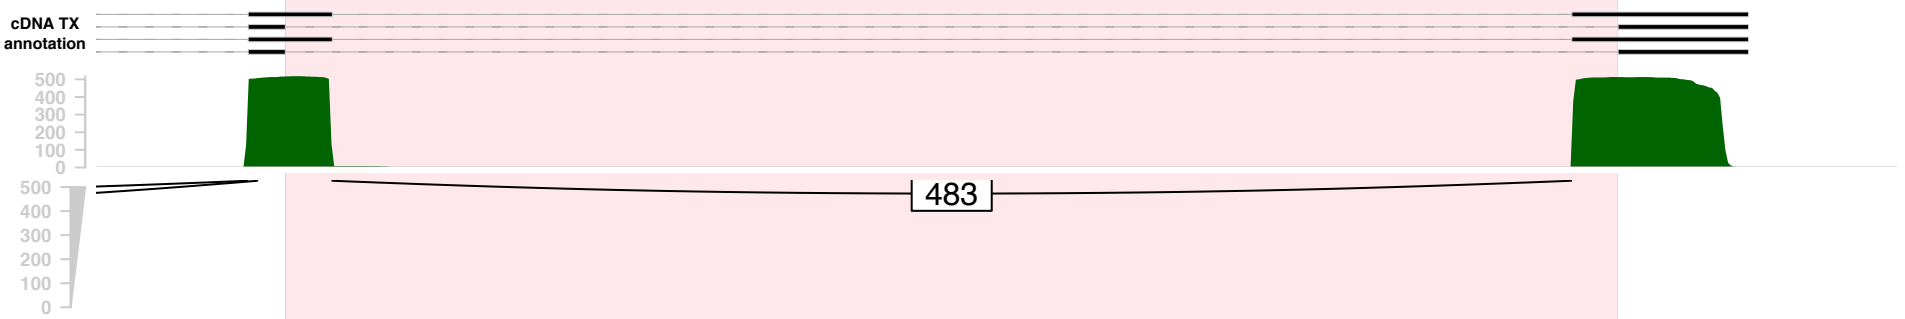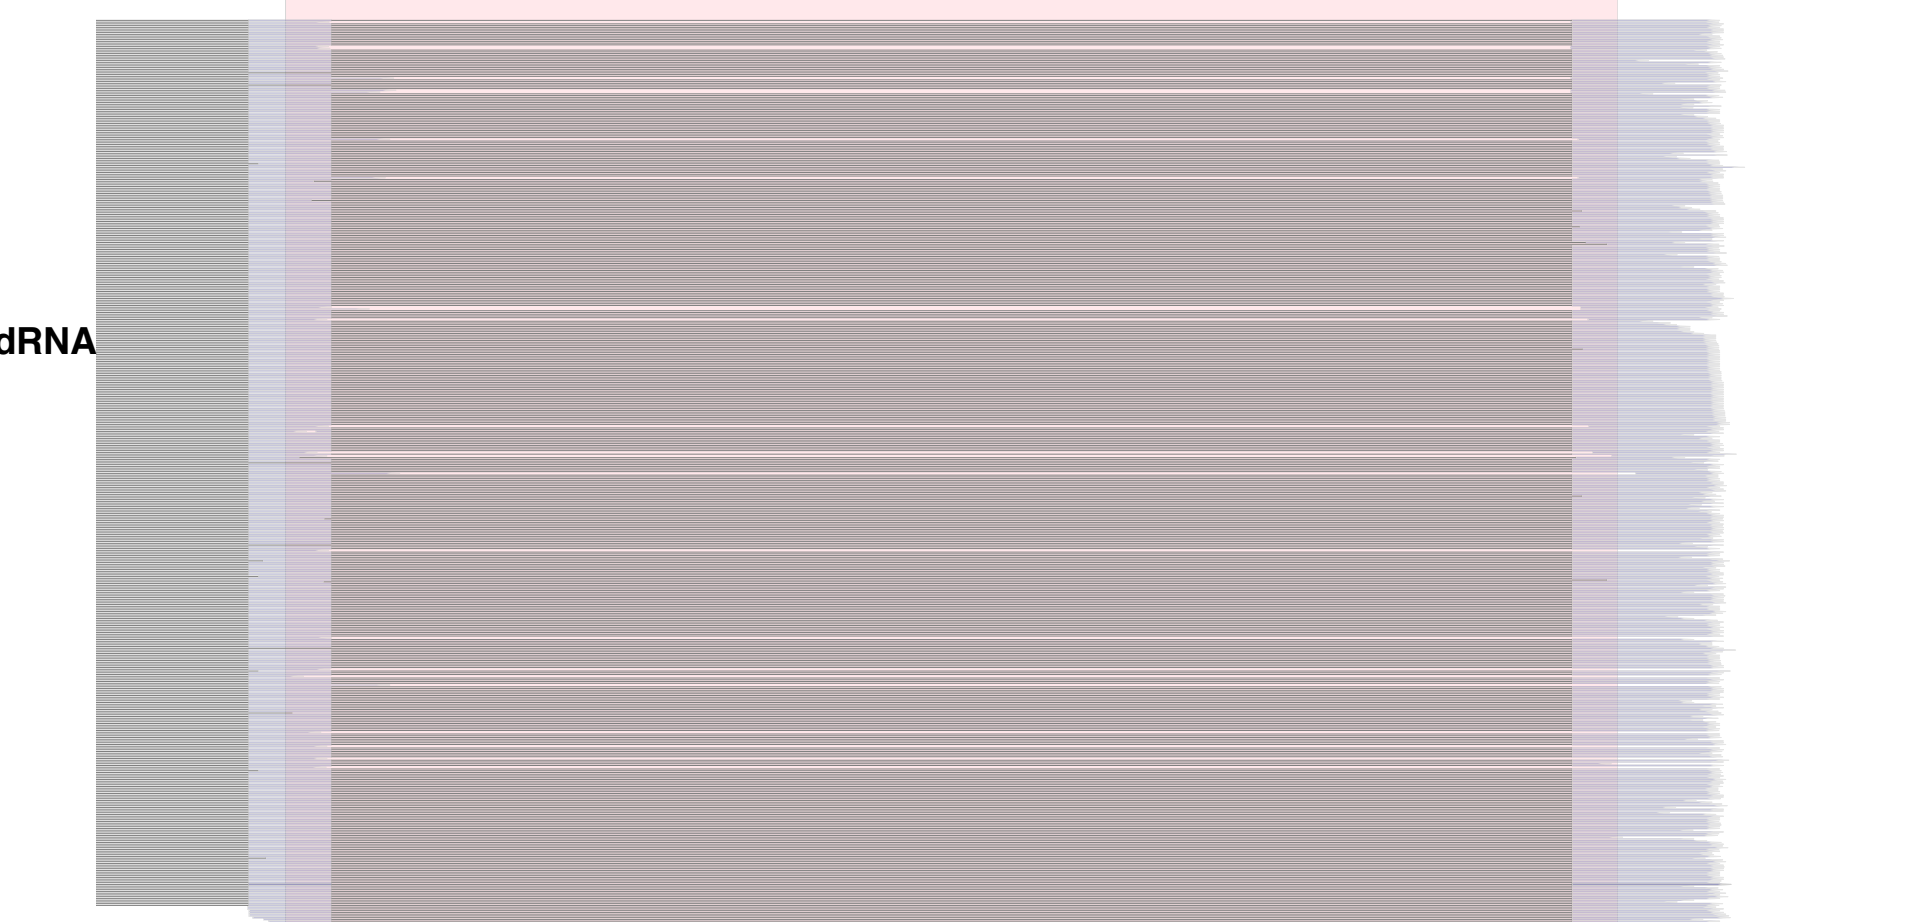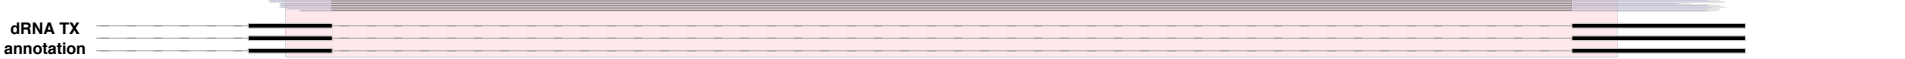

chr1:28335286-28335574:+ MED18

Cell line: Hct116

Direct repeat sequence: CCCA

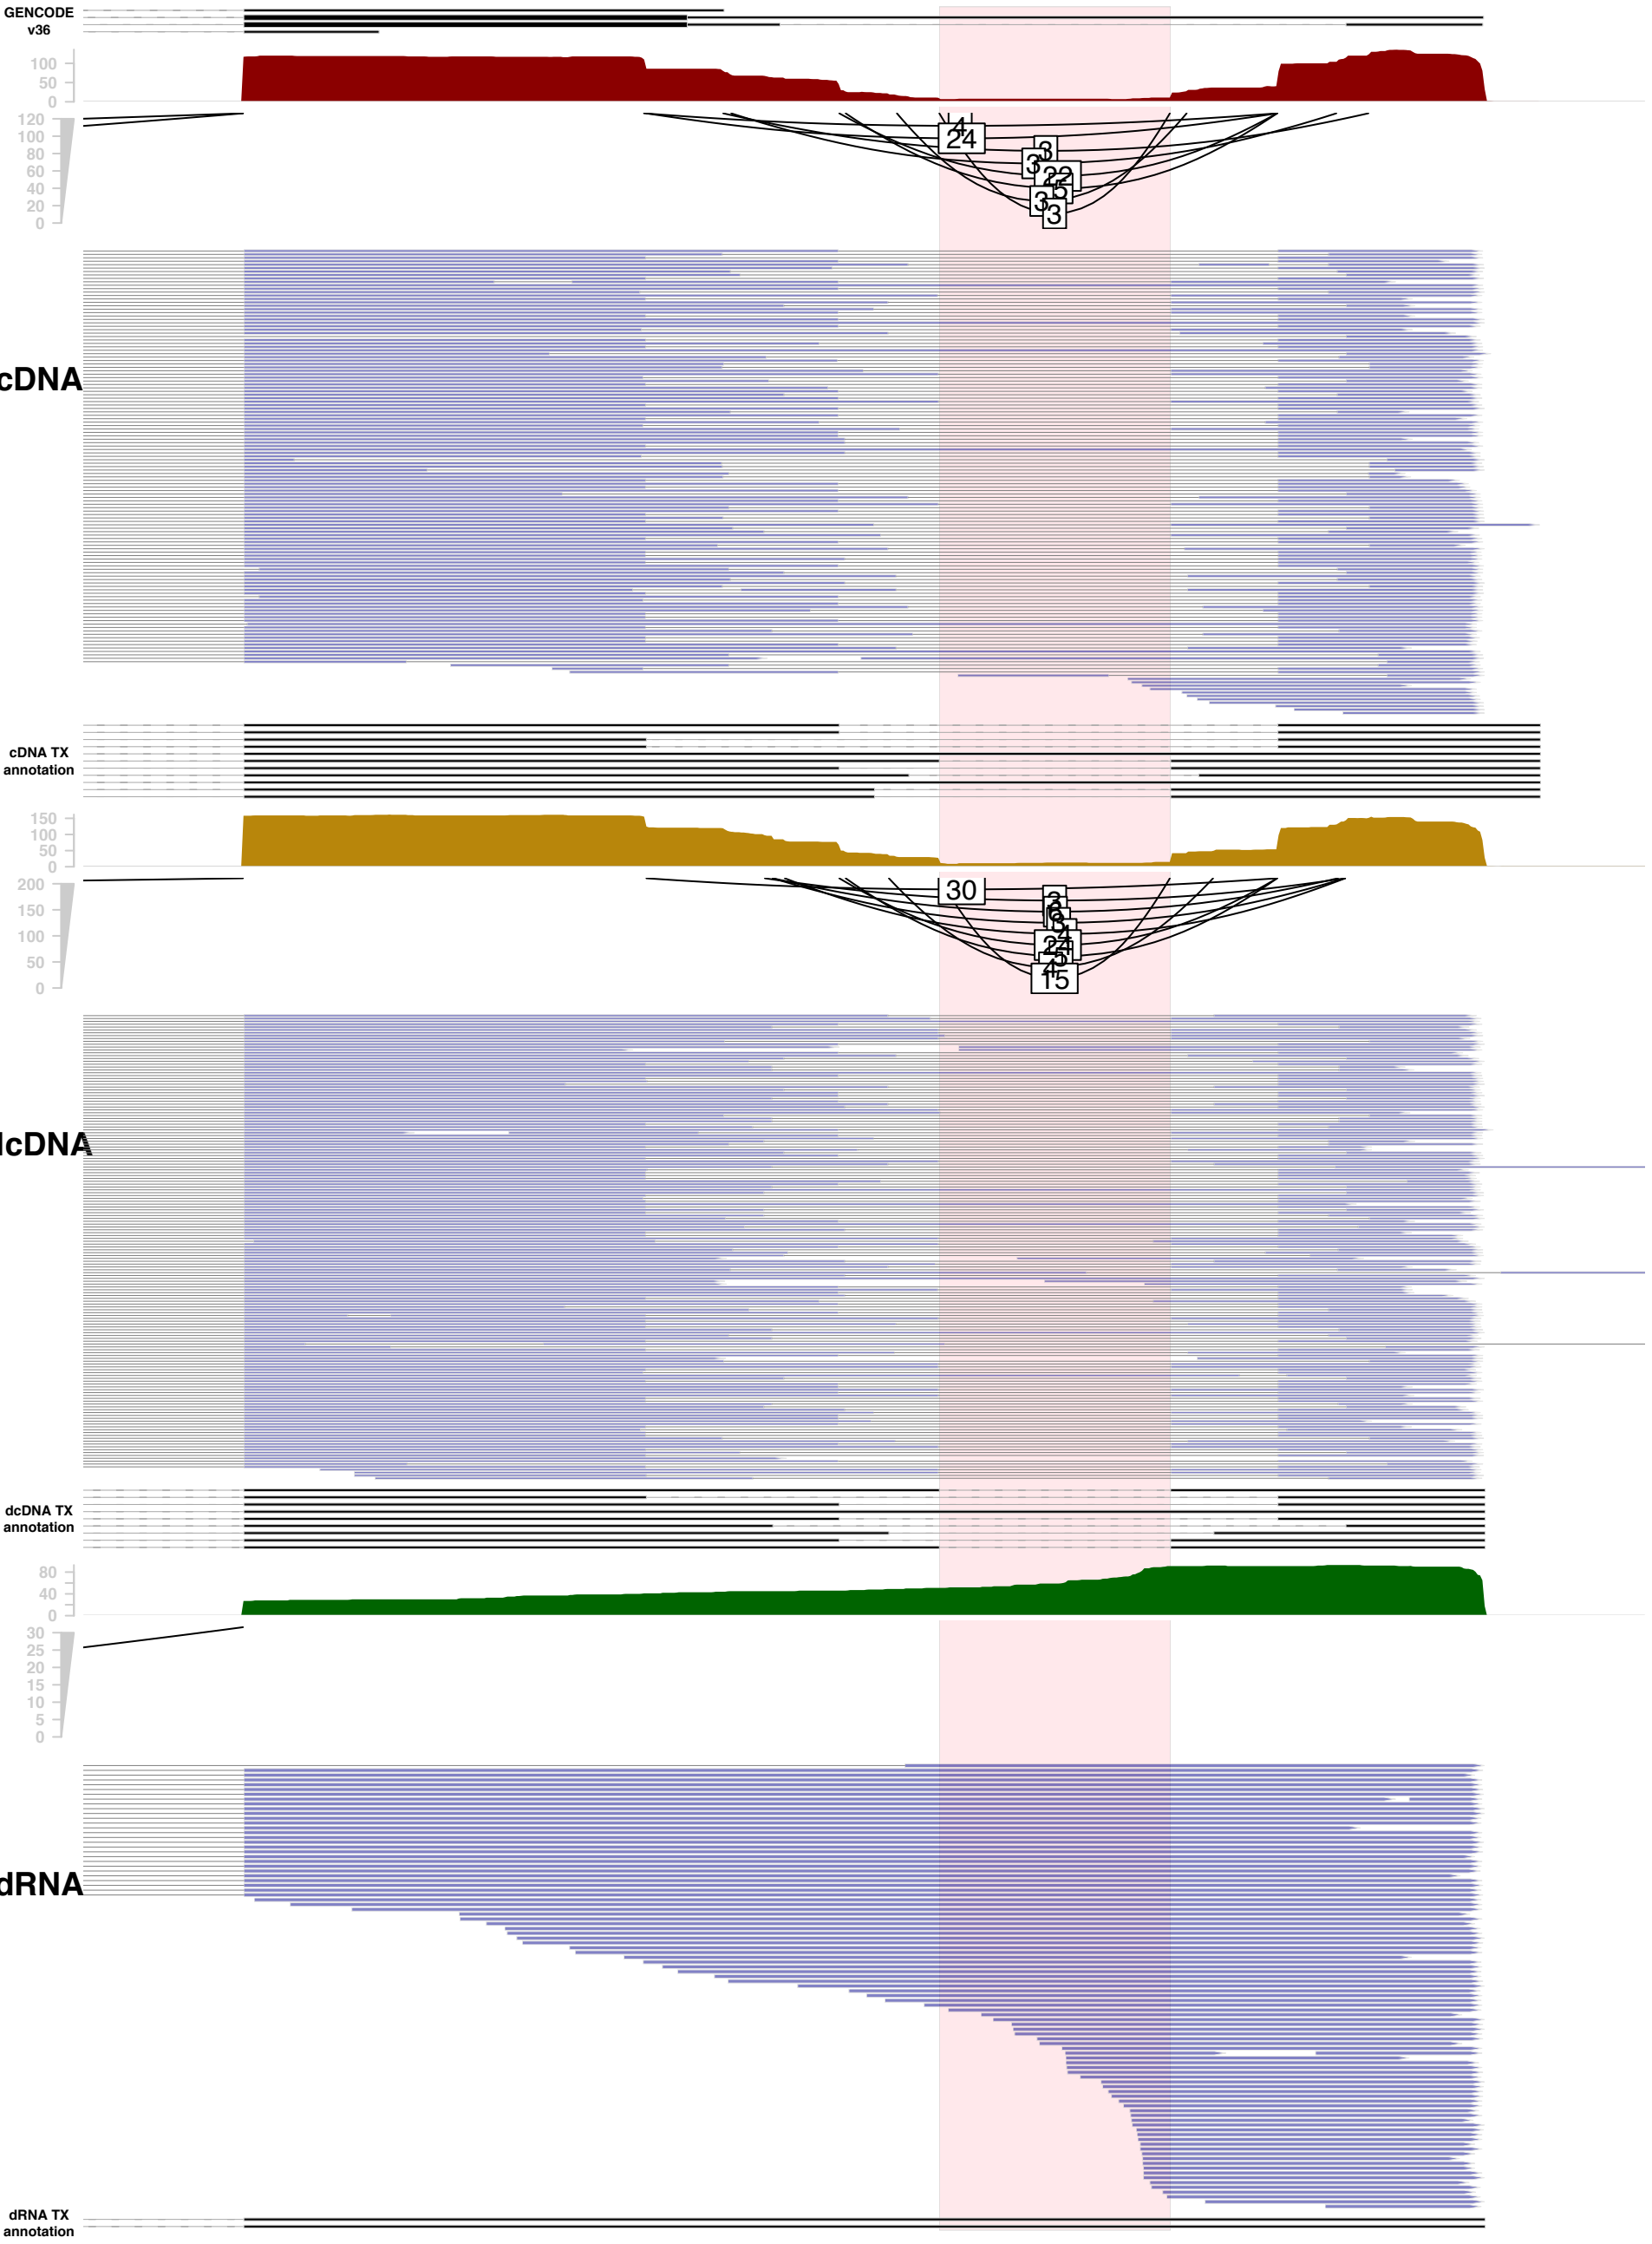

chr1:28334920-28335708:+ MED18

Cell line: Hct116

Direct repeat sequence: CAGCTA

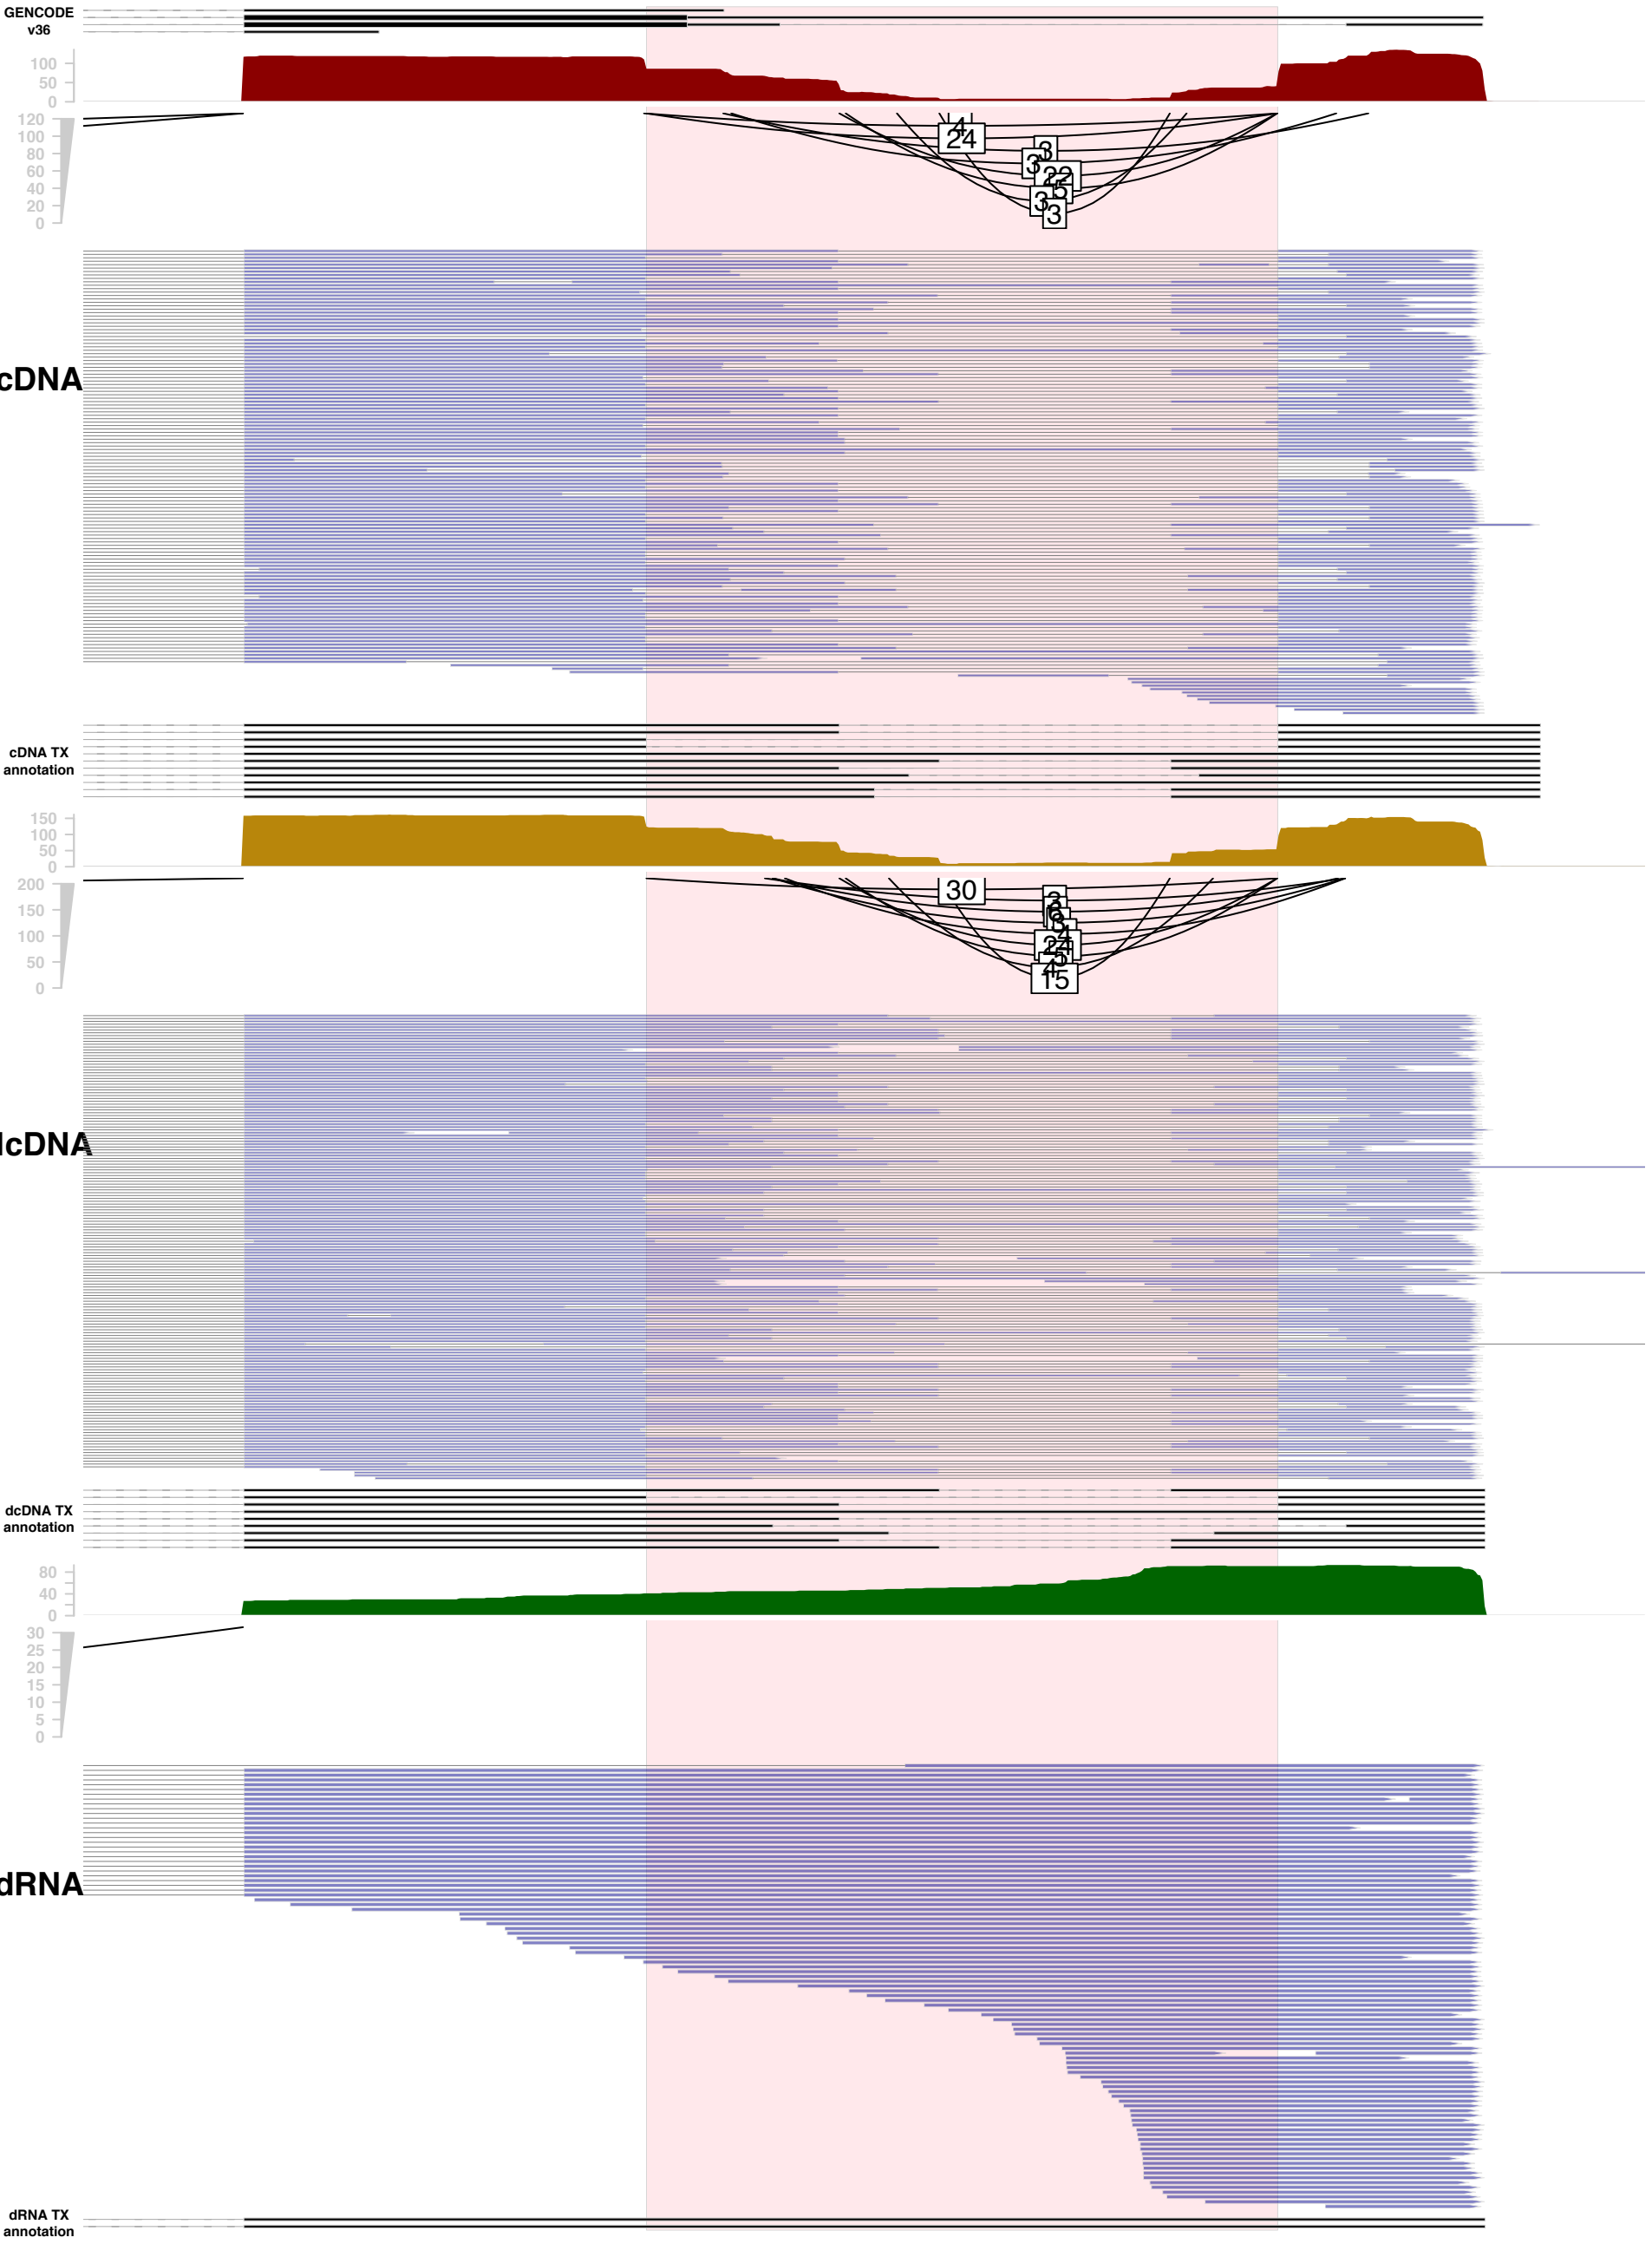



chr2:207754757-207754935:+ CCNYL1

Cell line: Hct116

Direct repeat sequence: CAGC

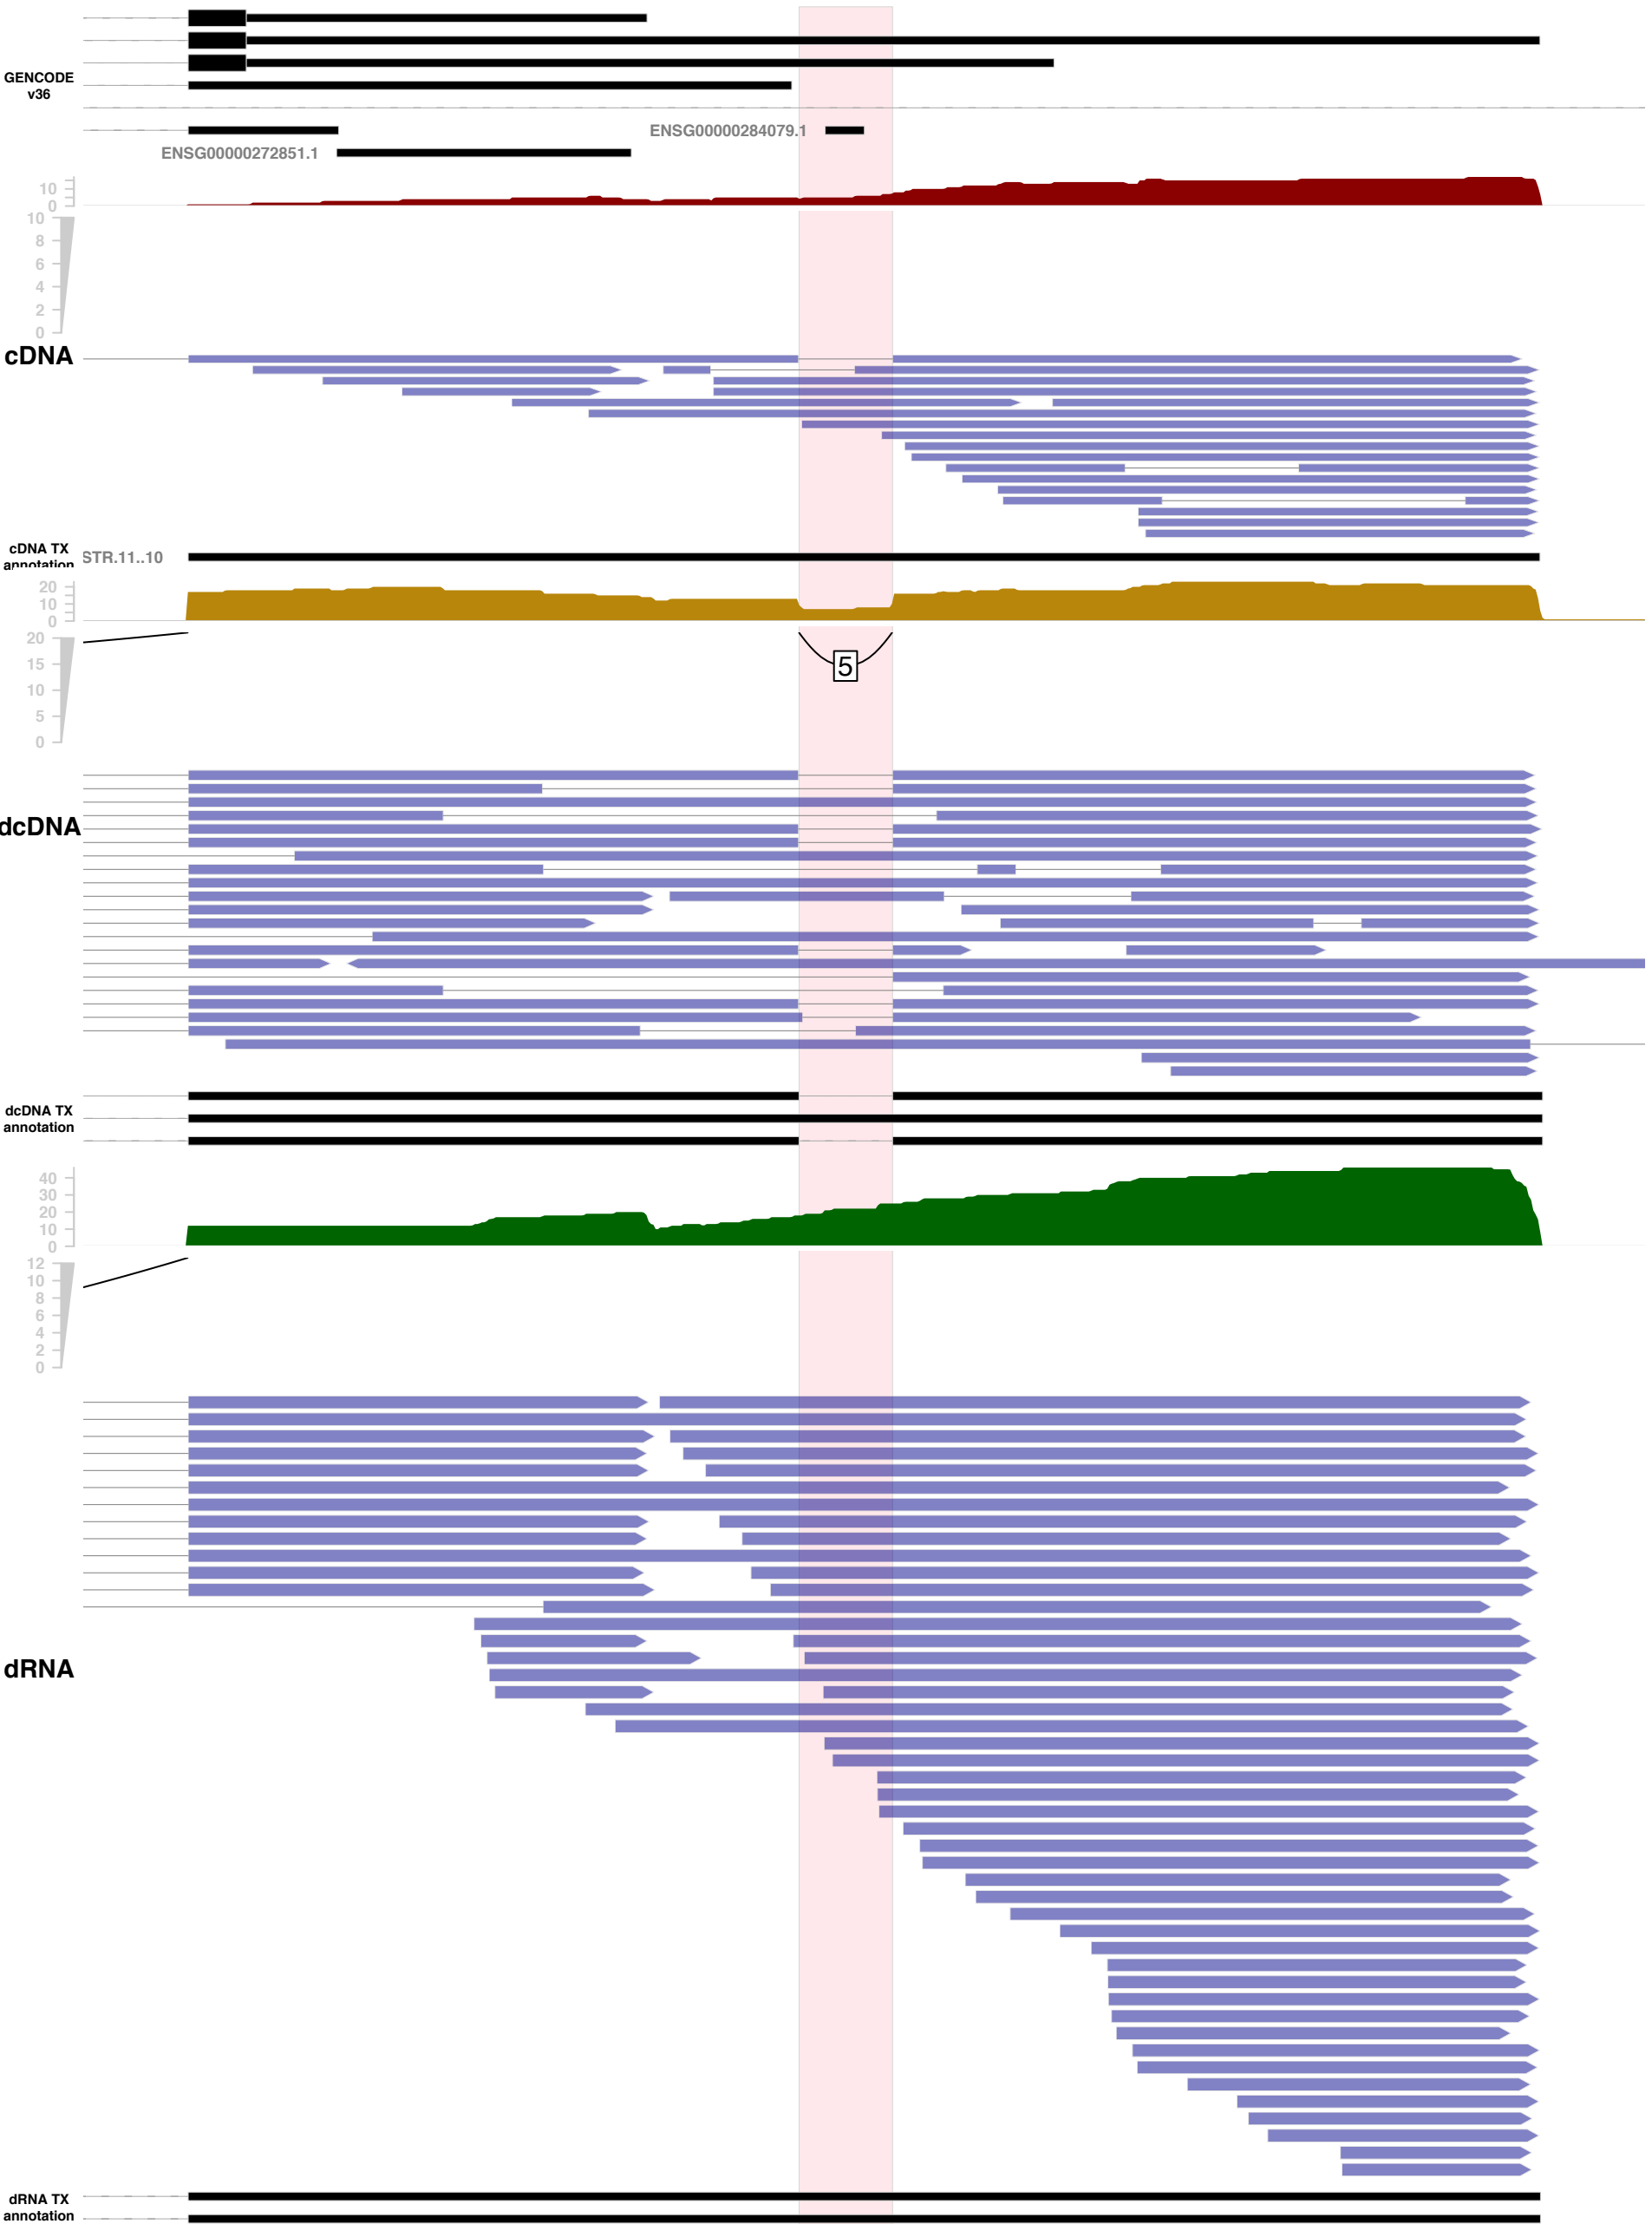

chr4:176331078-176331197:+ SPCS3

Cell line: Hct116

Direct repeat sequence: CAGC

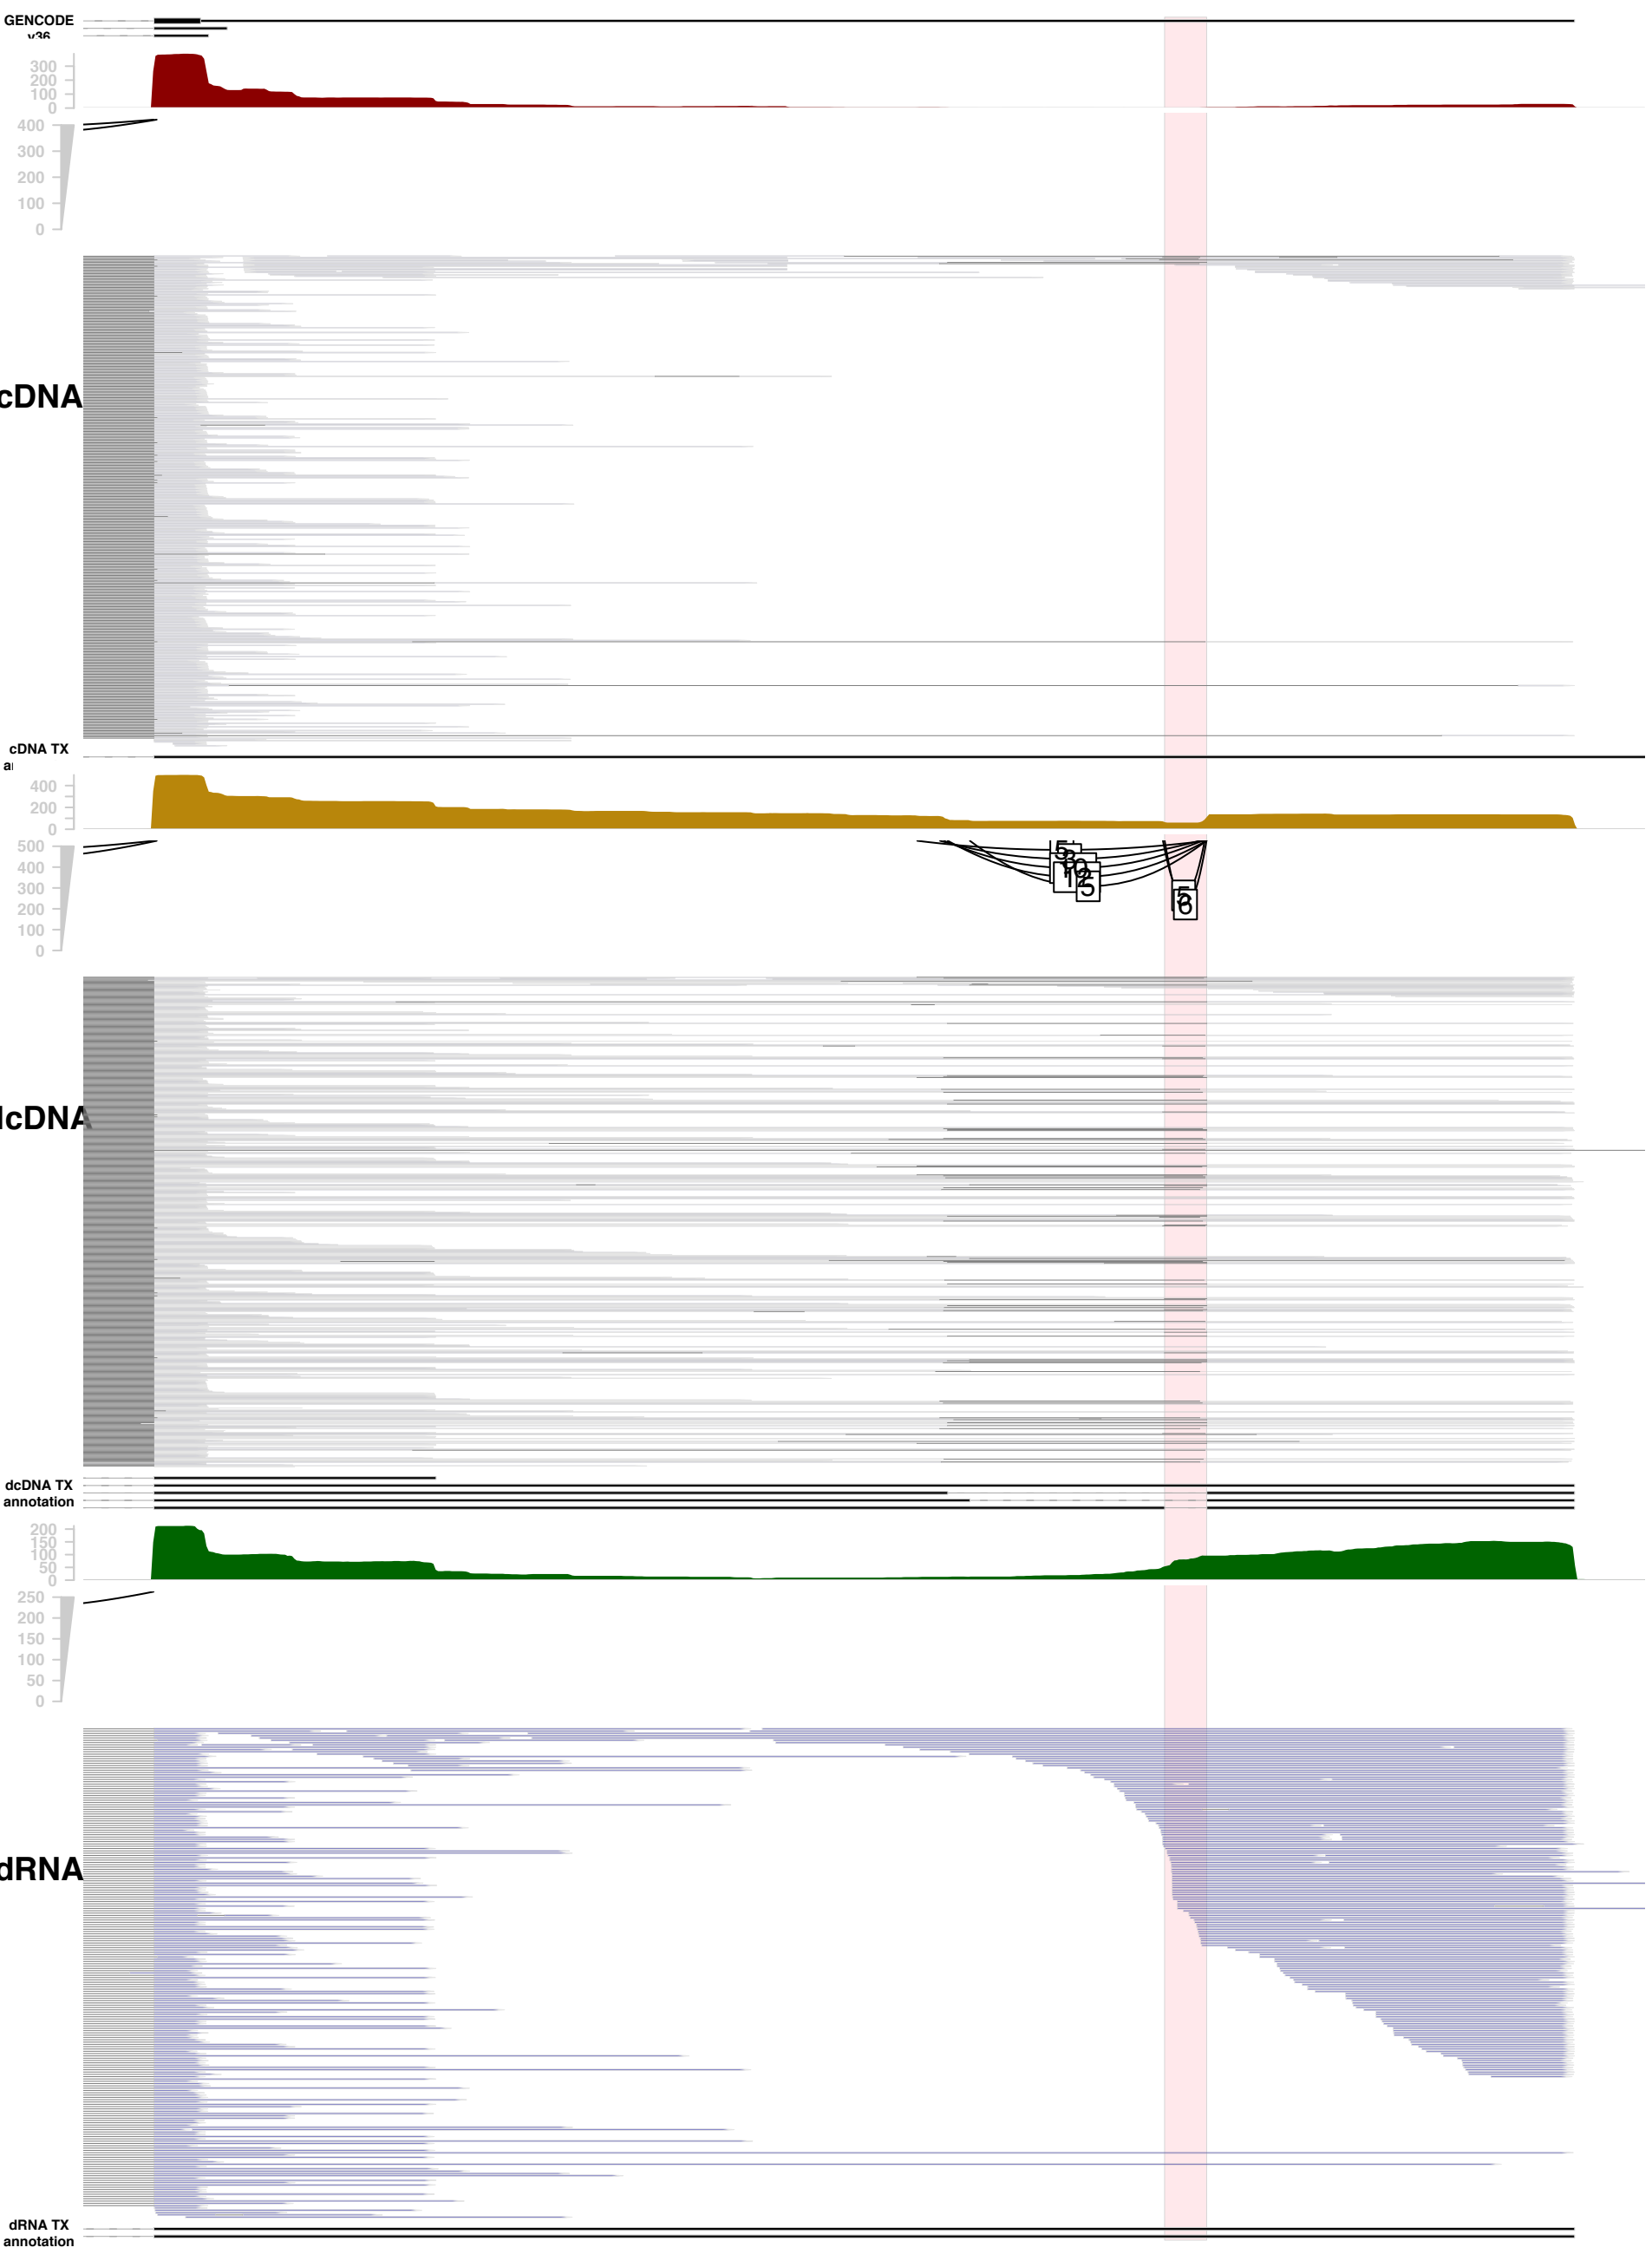

chr5:126625543-126625746:+ PHAX

Cell line: Hct116

Direct repeat sequence: GCTG

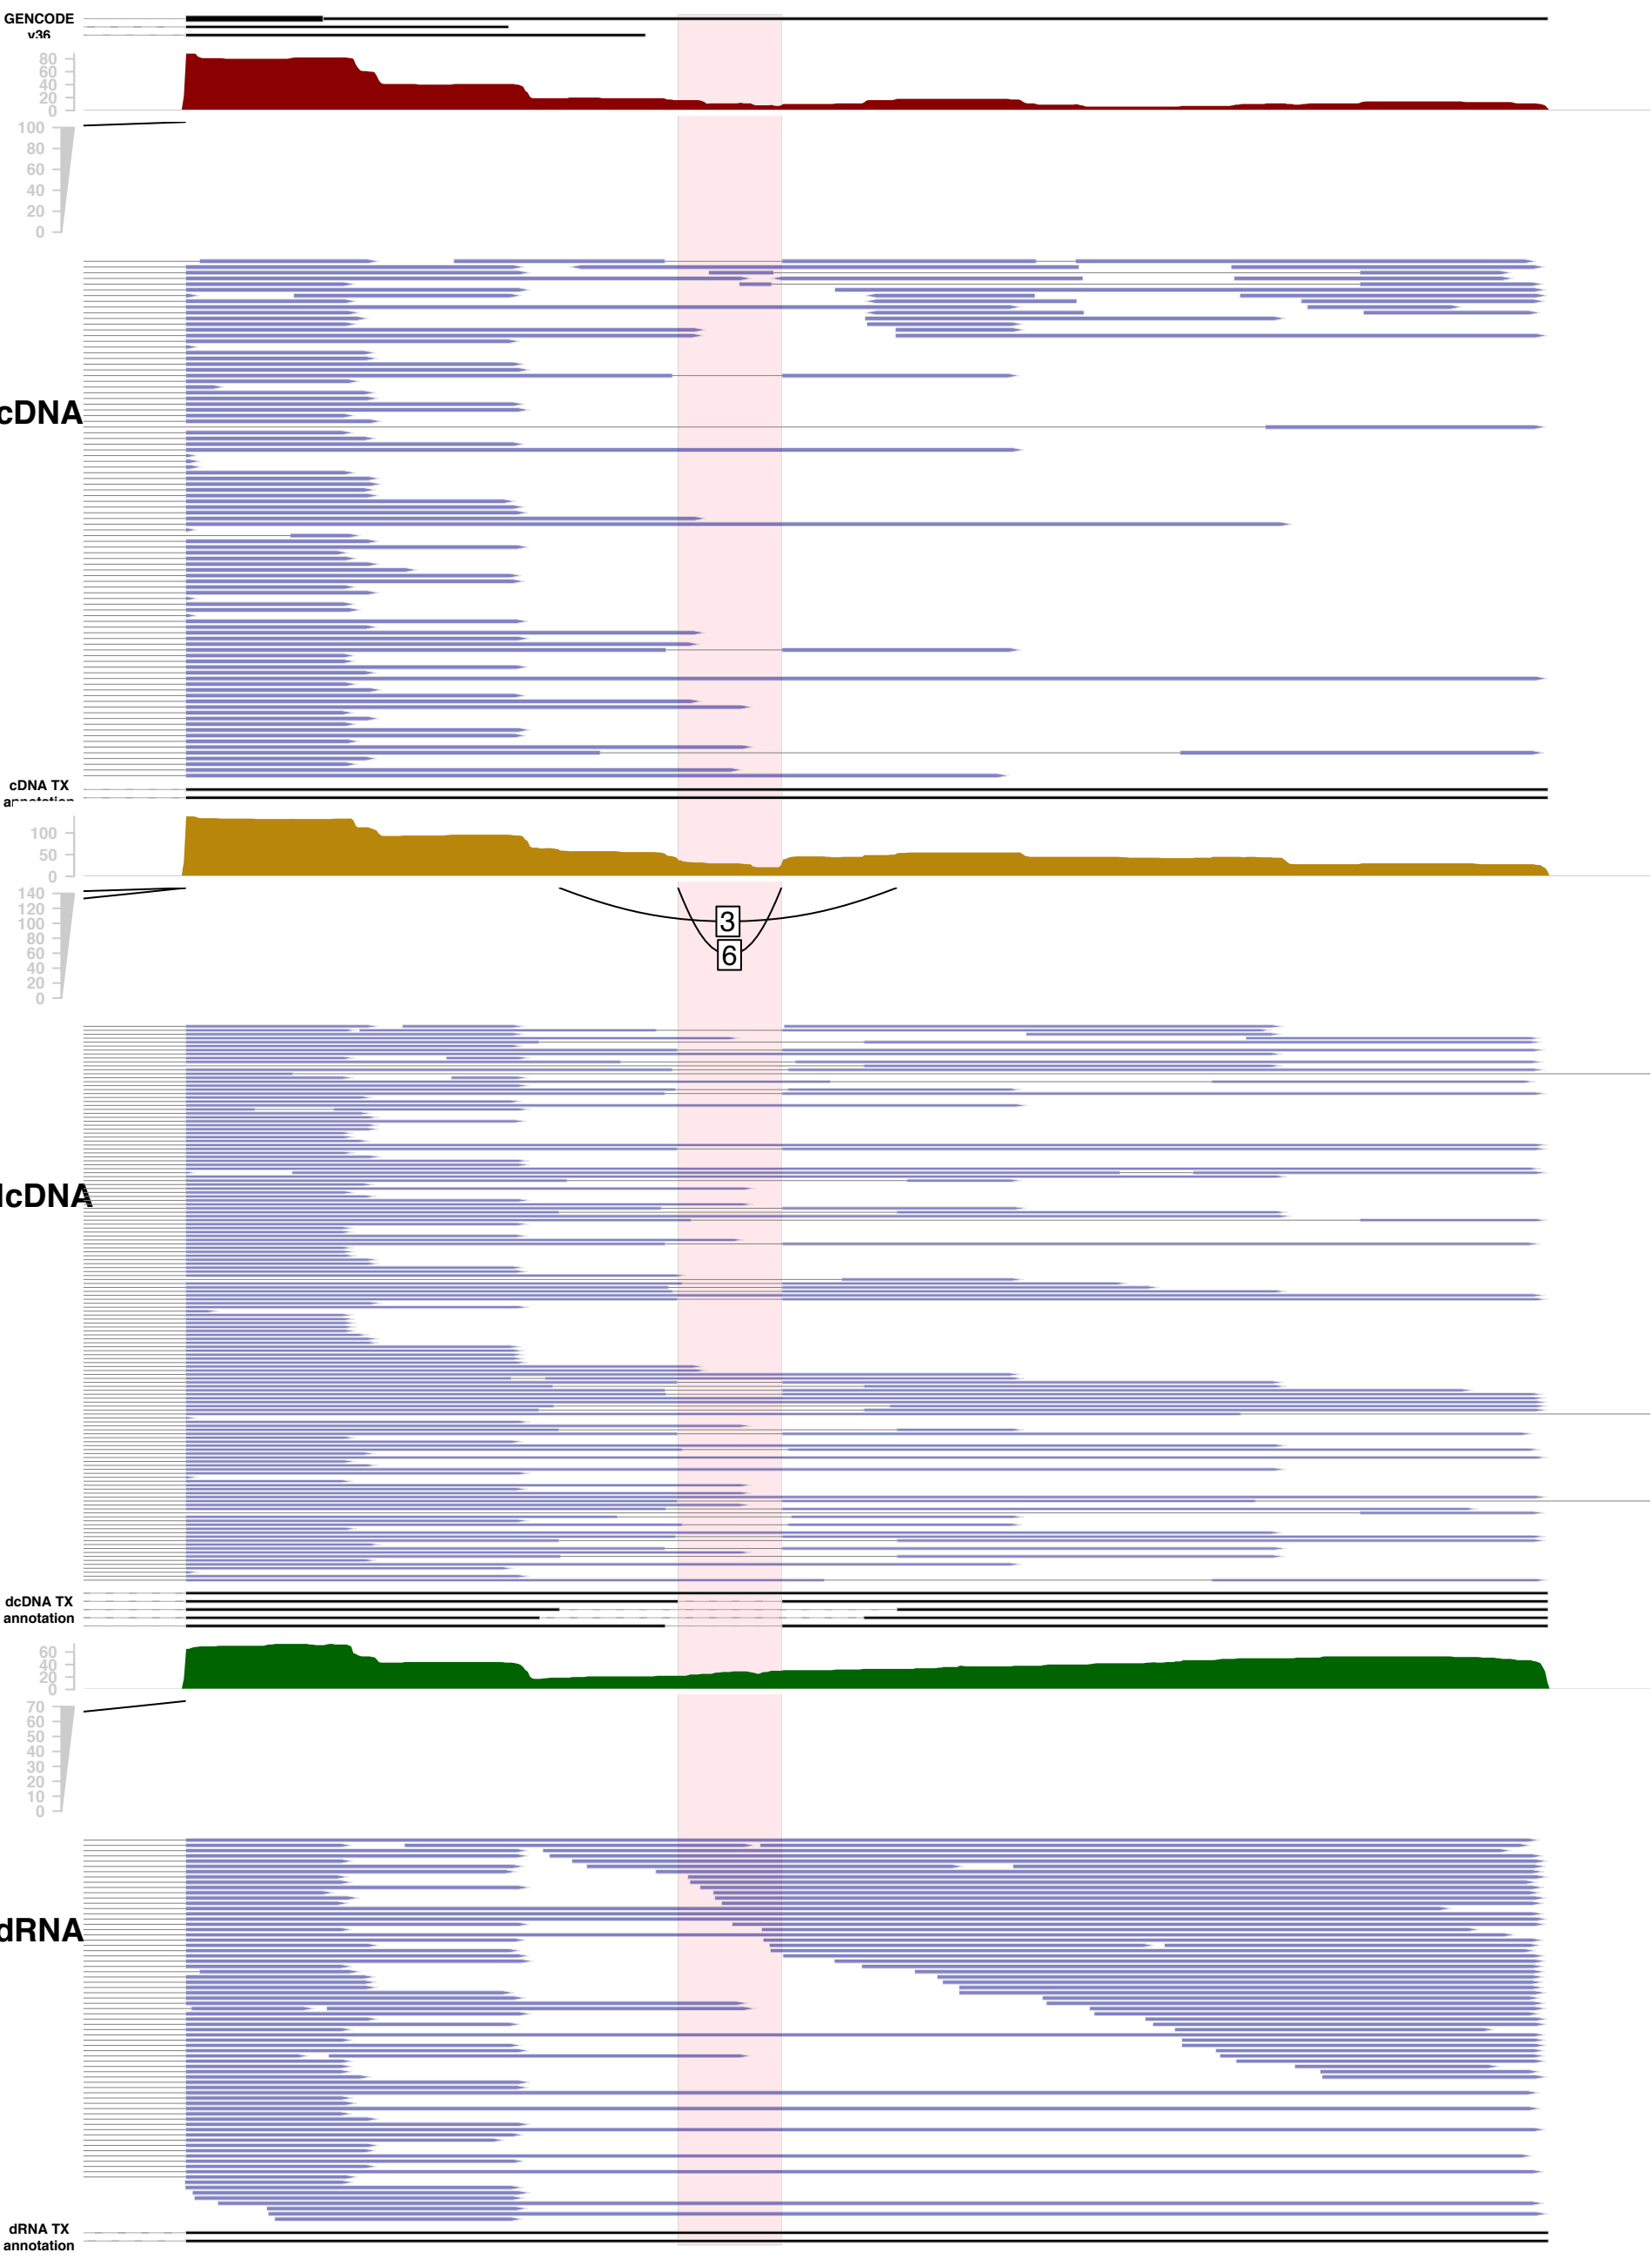

chr6:42887275-42888373:+ RPL7L1

Cell line: Hct116

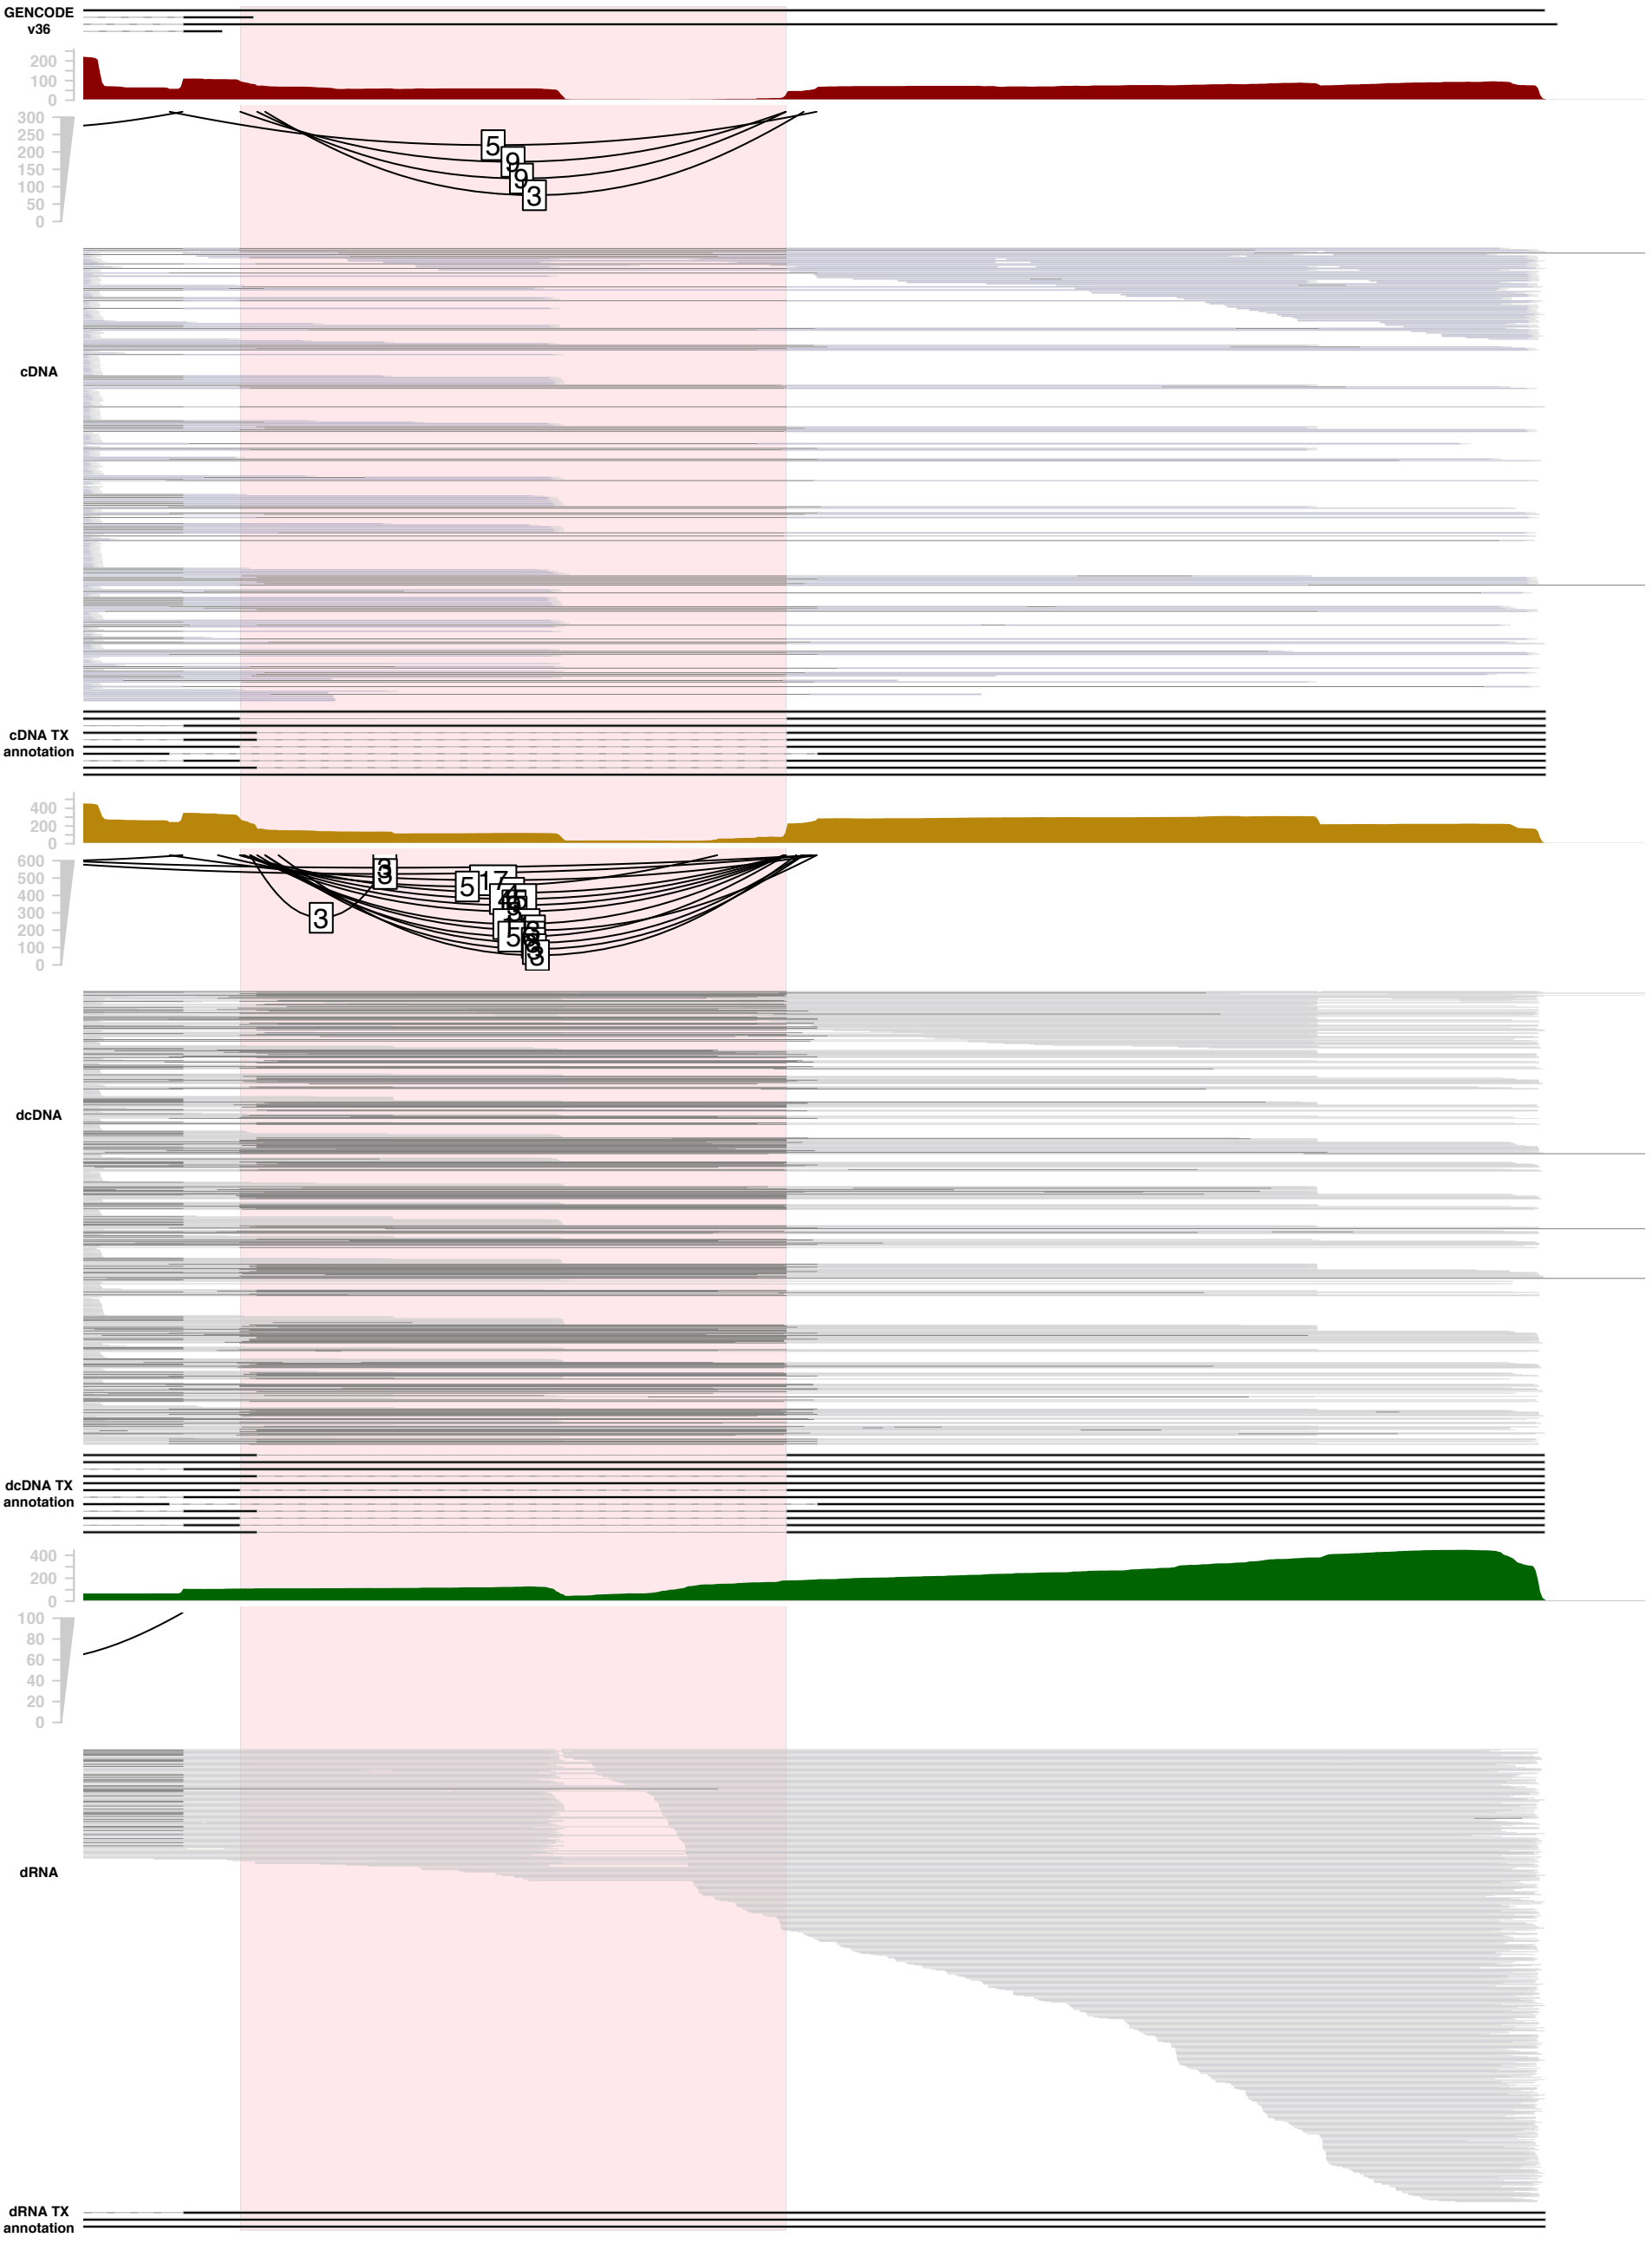

chr6:170584411-170584491:- PDCD2

Cell line: Hct116

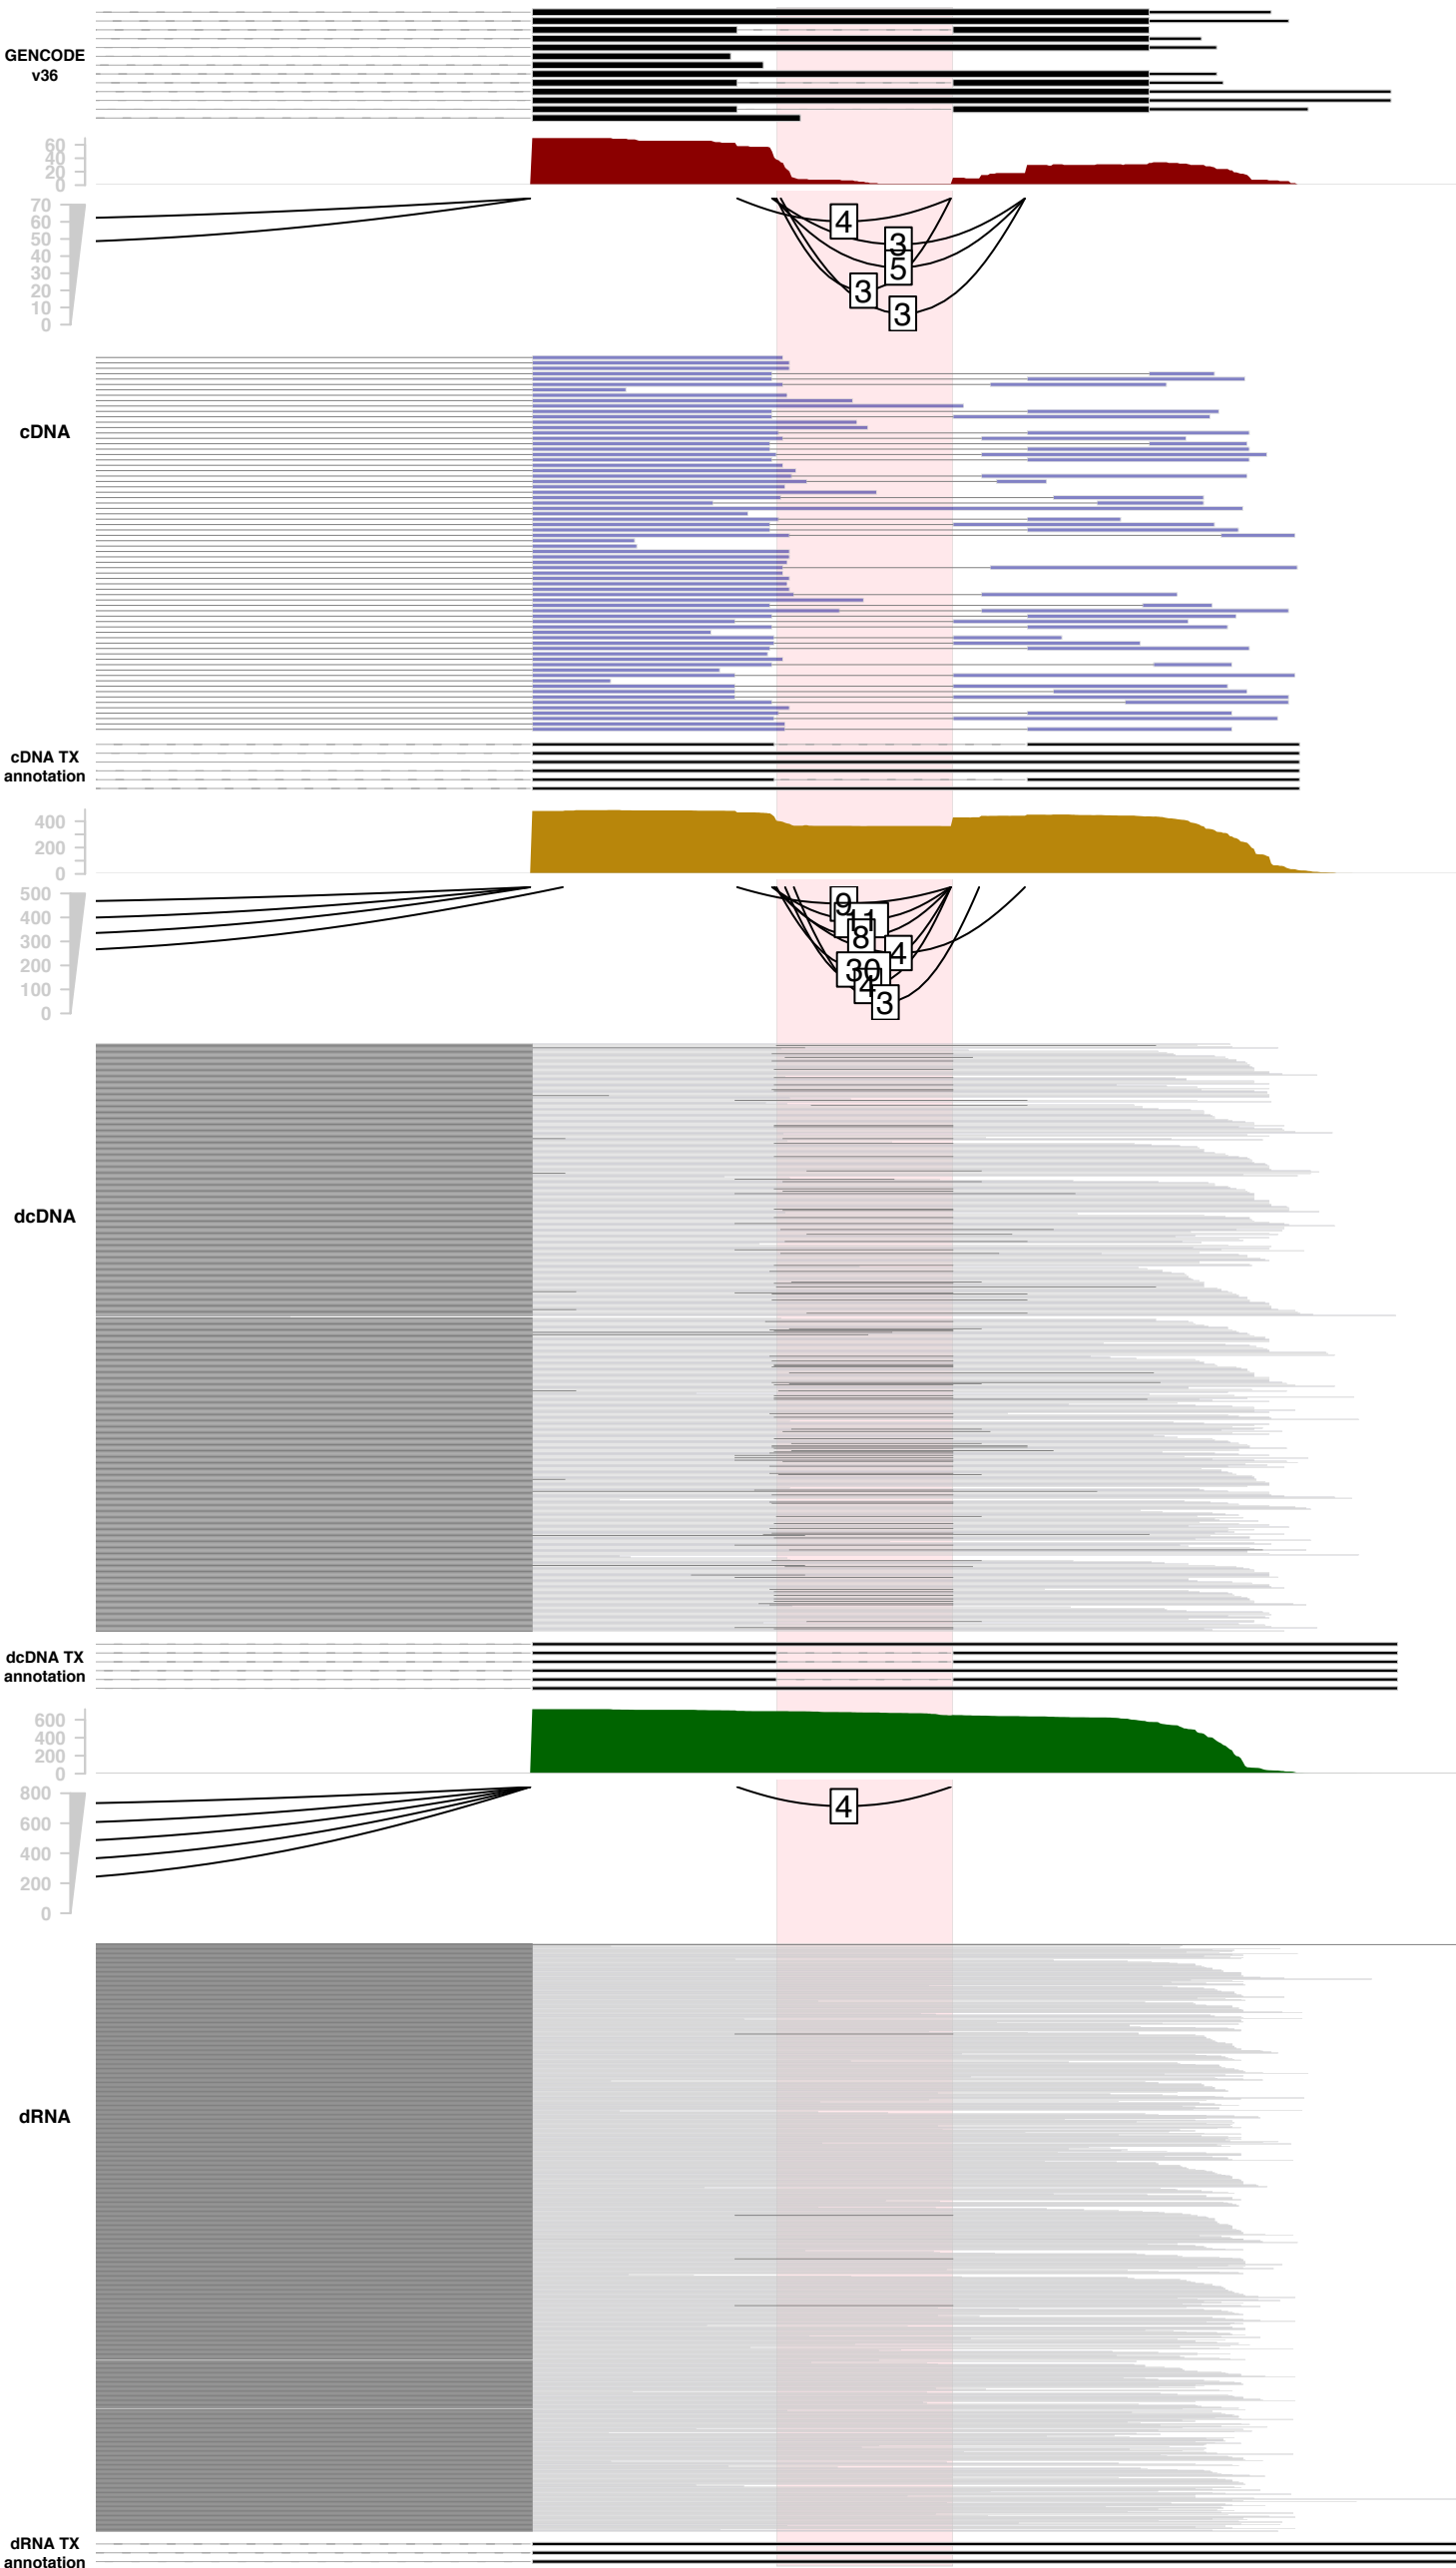

chr8:95245505-95246254:- C8orf37

Cell line: Hct116

Direct repeat sequence: CAGC

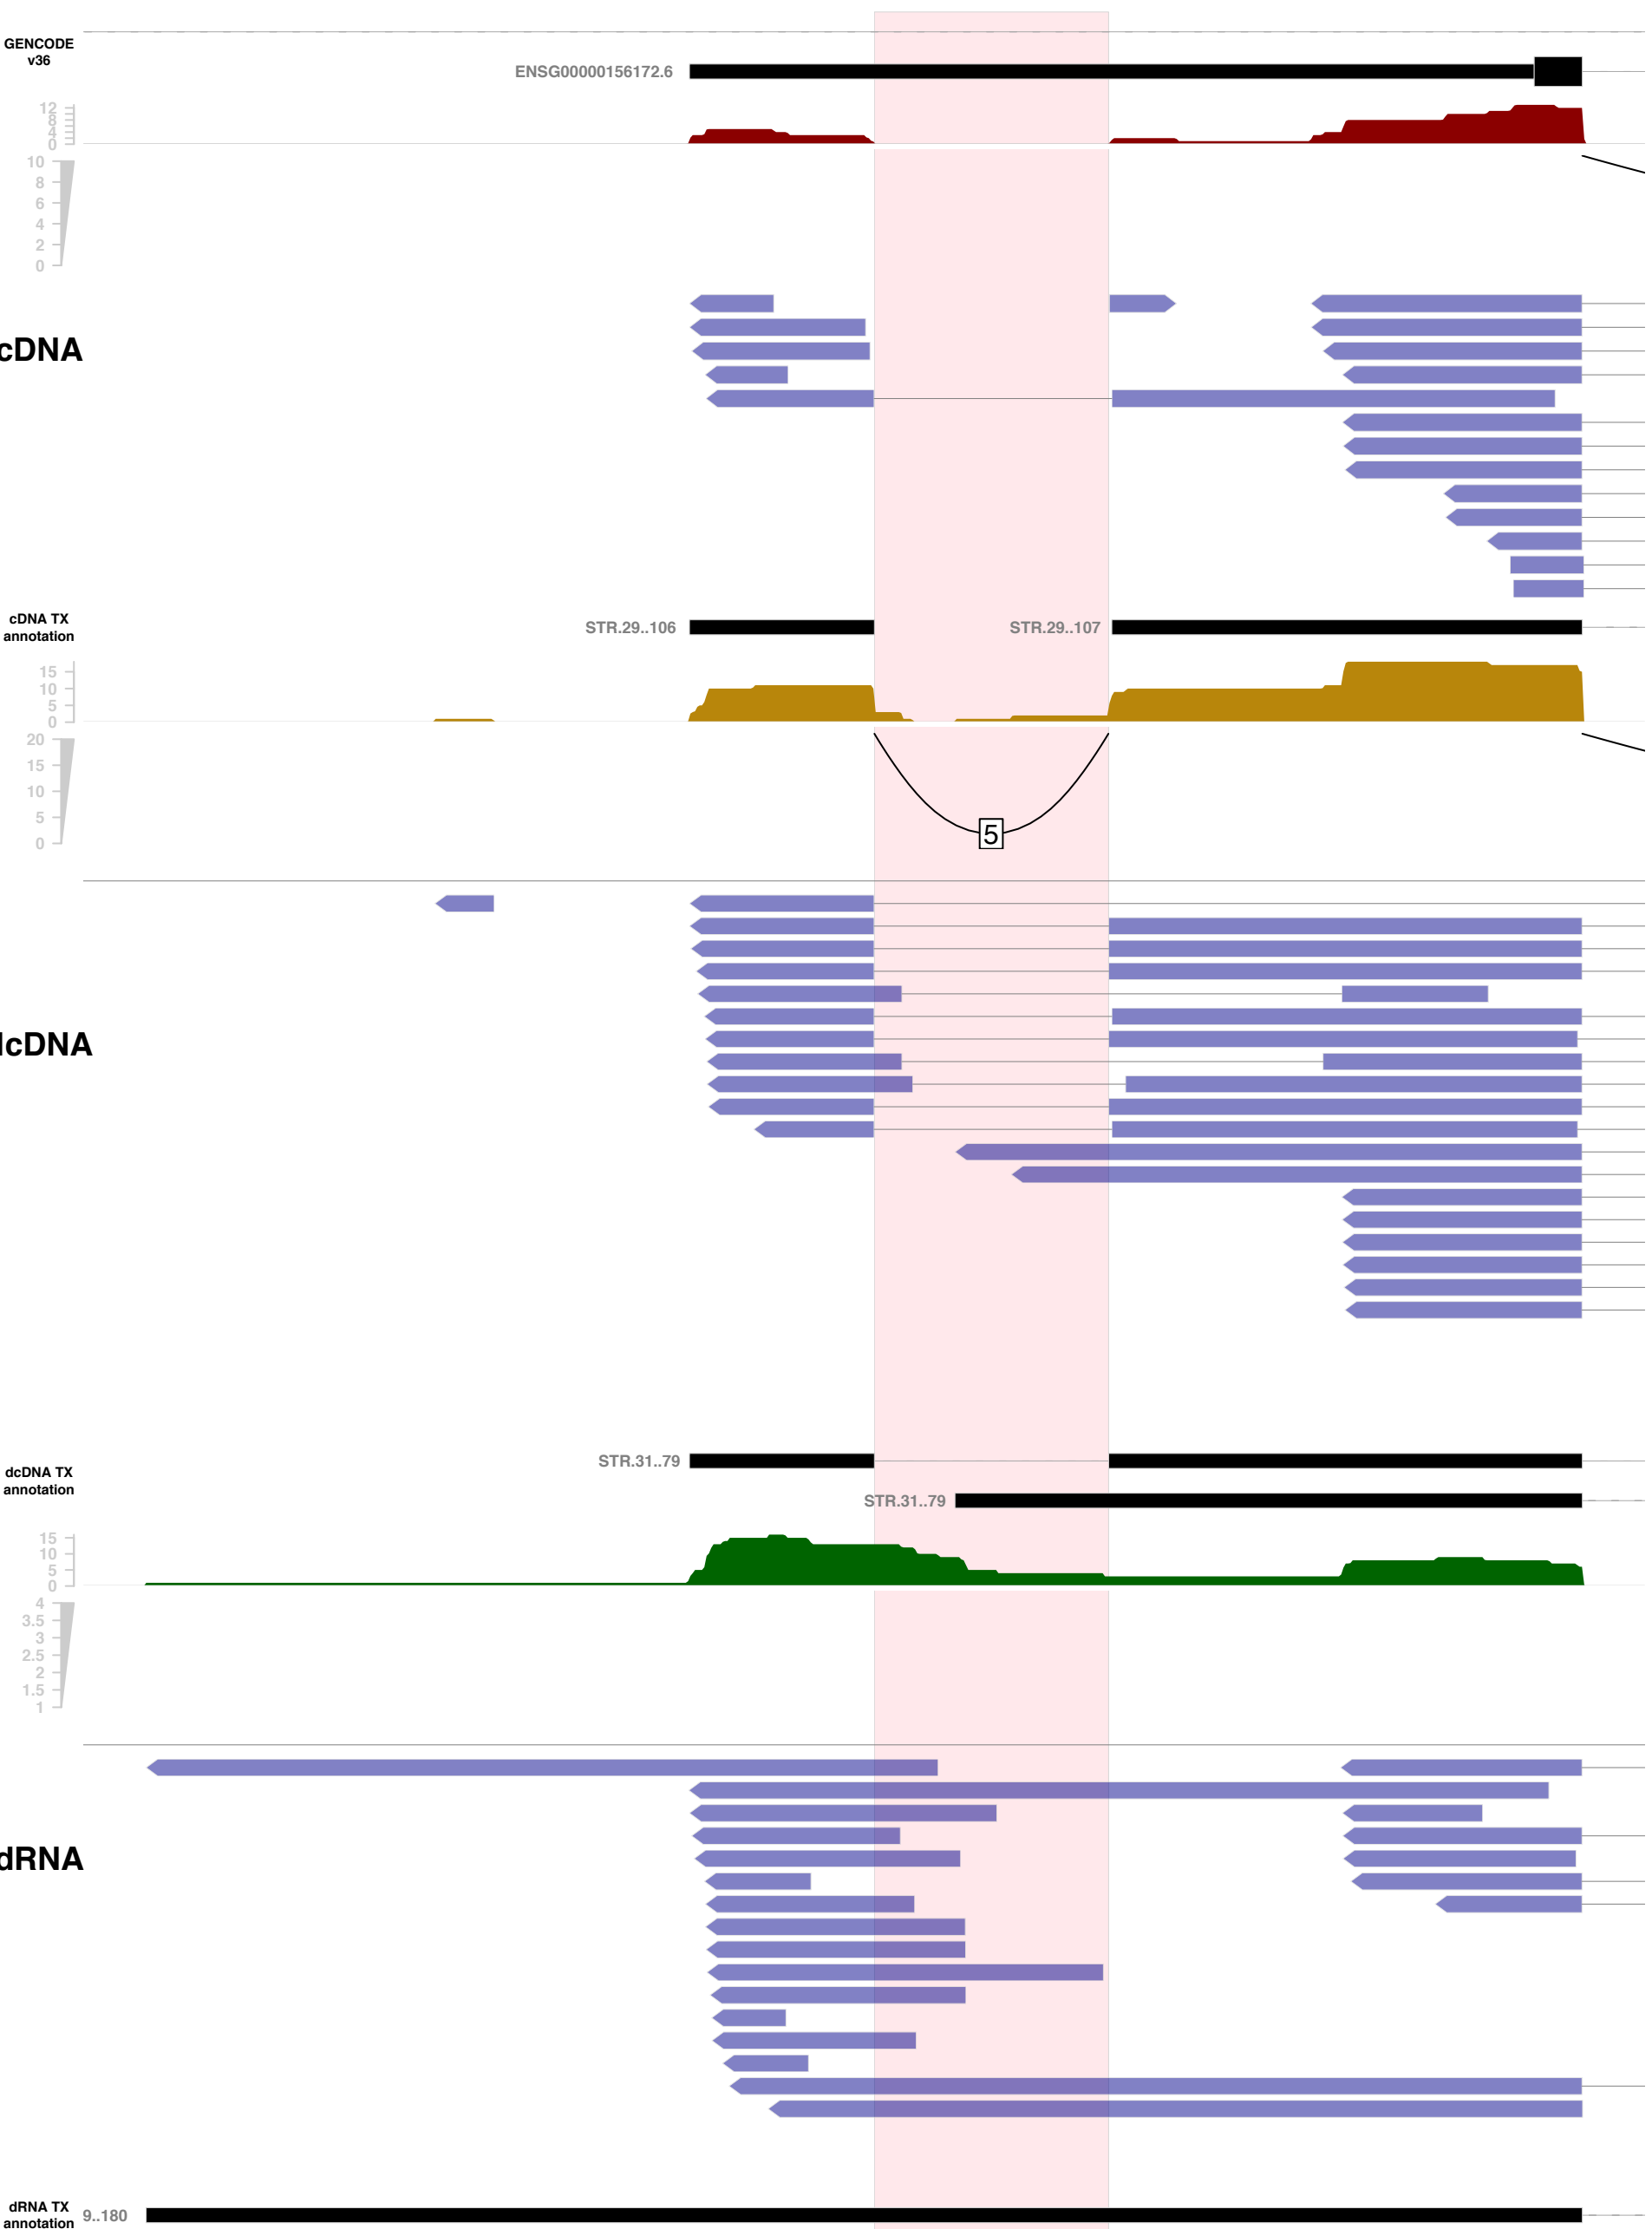

chr9:125149260-125149583:- PPP6C

Cell line: Hct116

Direct repeat sequence: AGCA

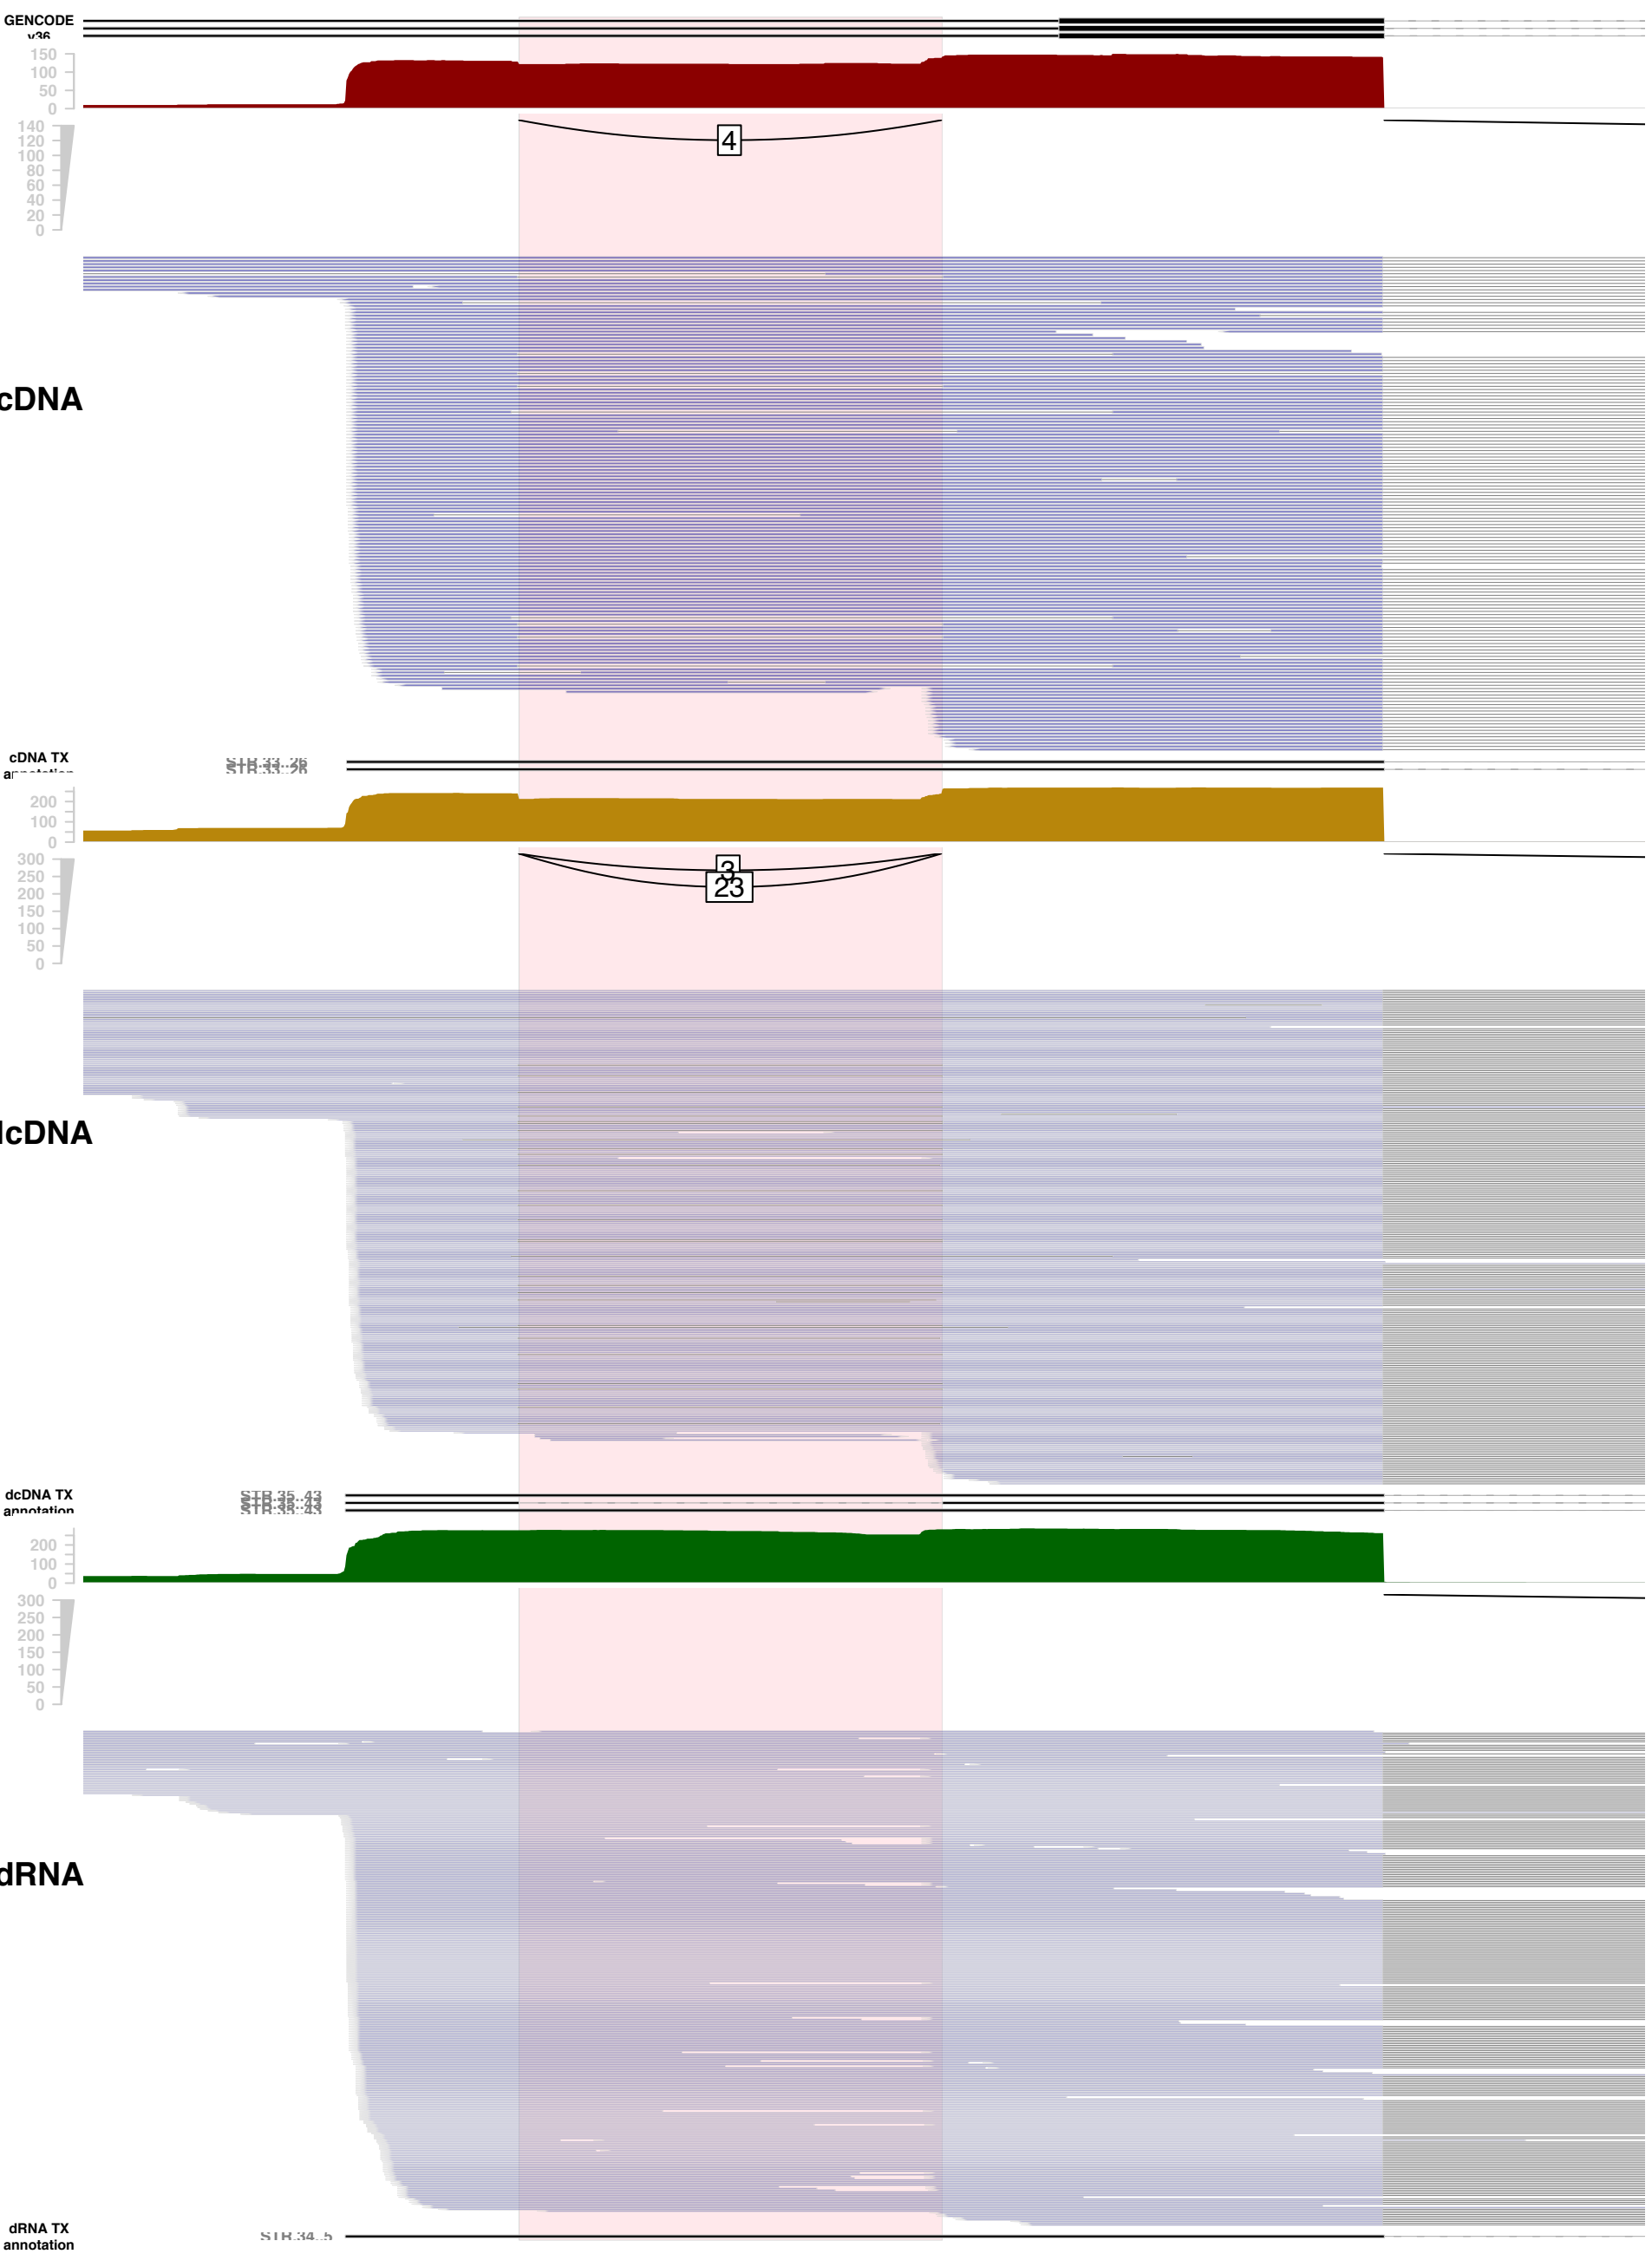

chr11:60842626-60842700:+ CCDC86

Cell line: Hct116

Direct repeat sequence: GGTCAGCA

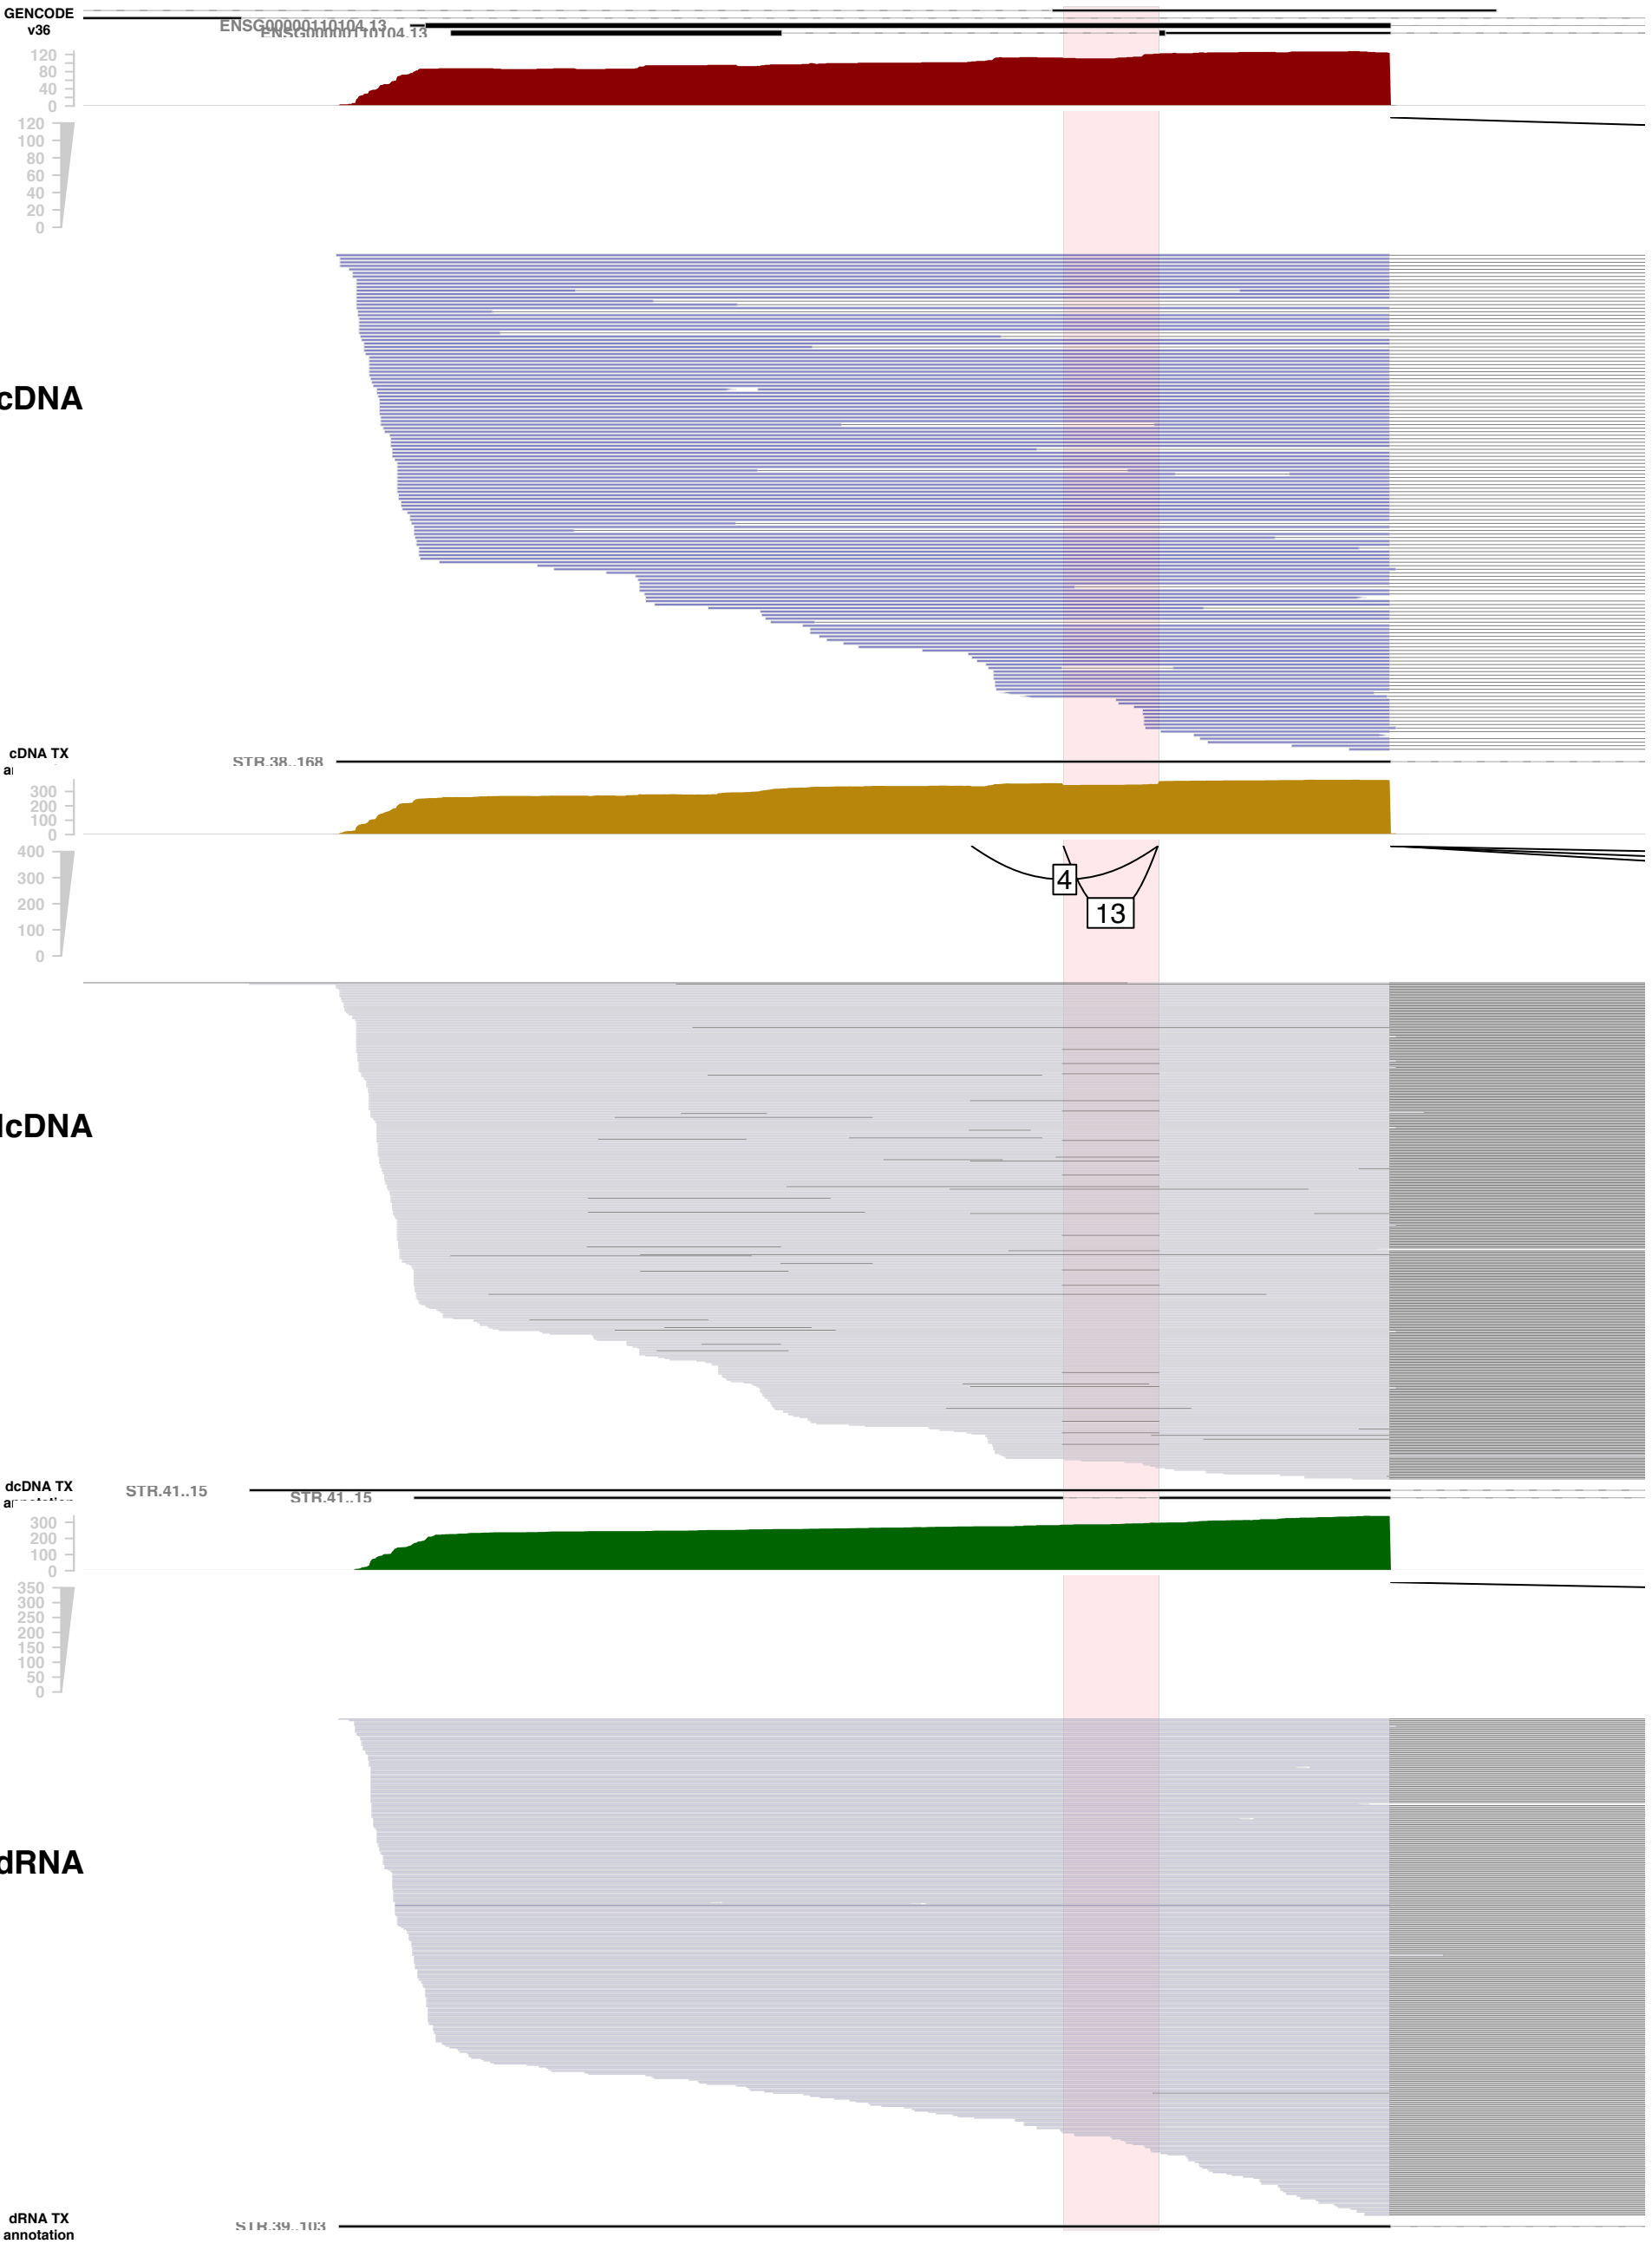



chr12:49351611-49353978:+ DNAJC22

Cell line: Hct116

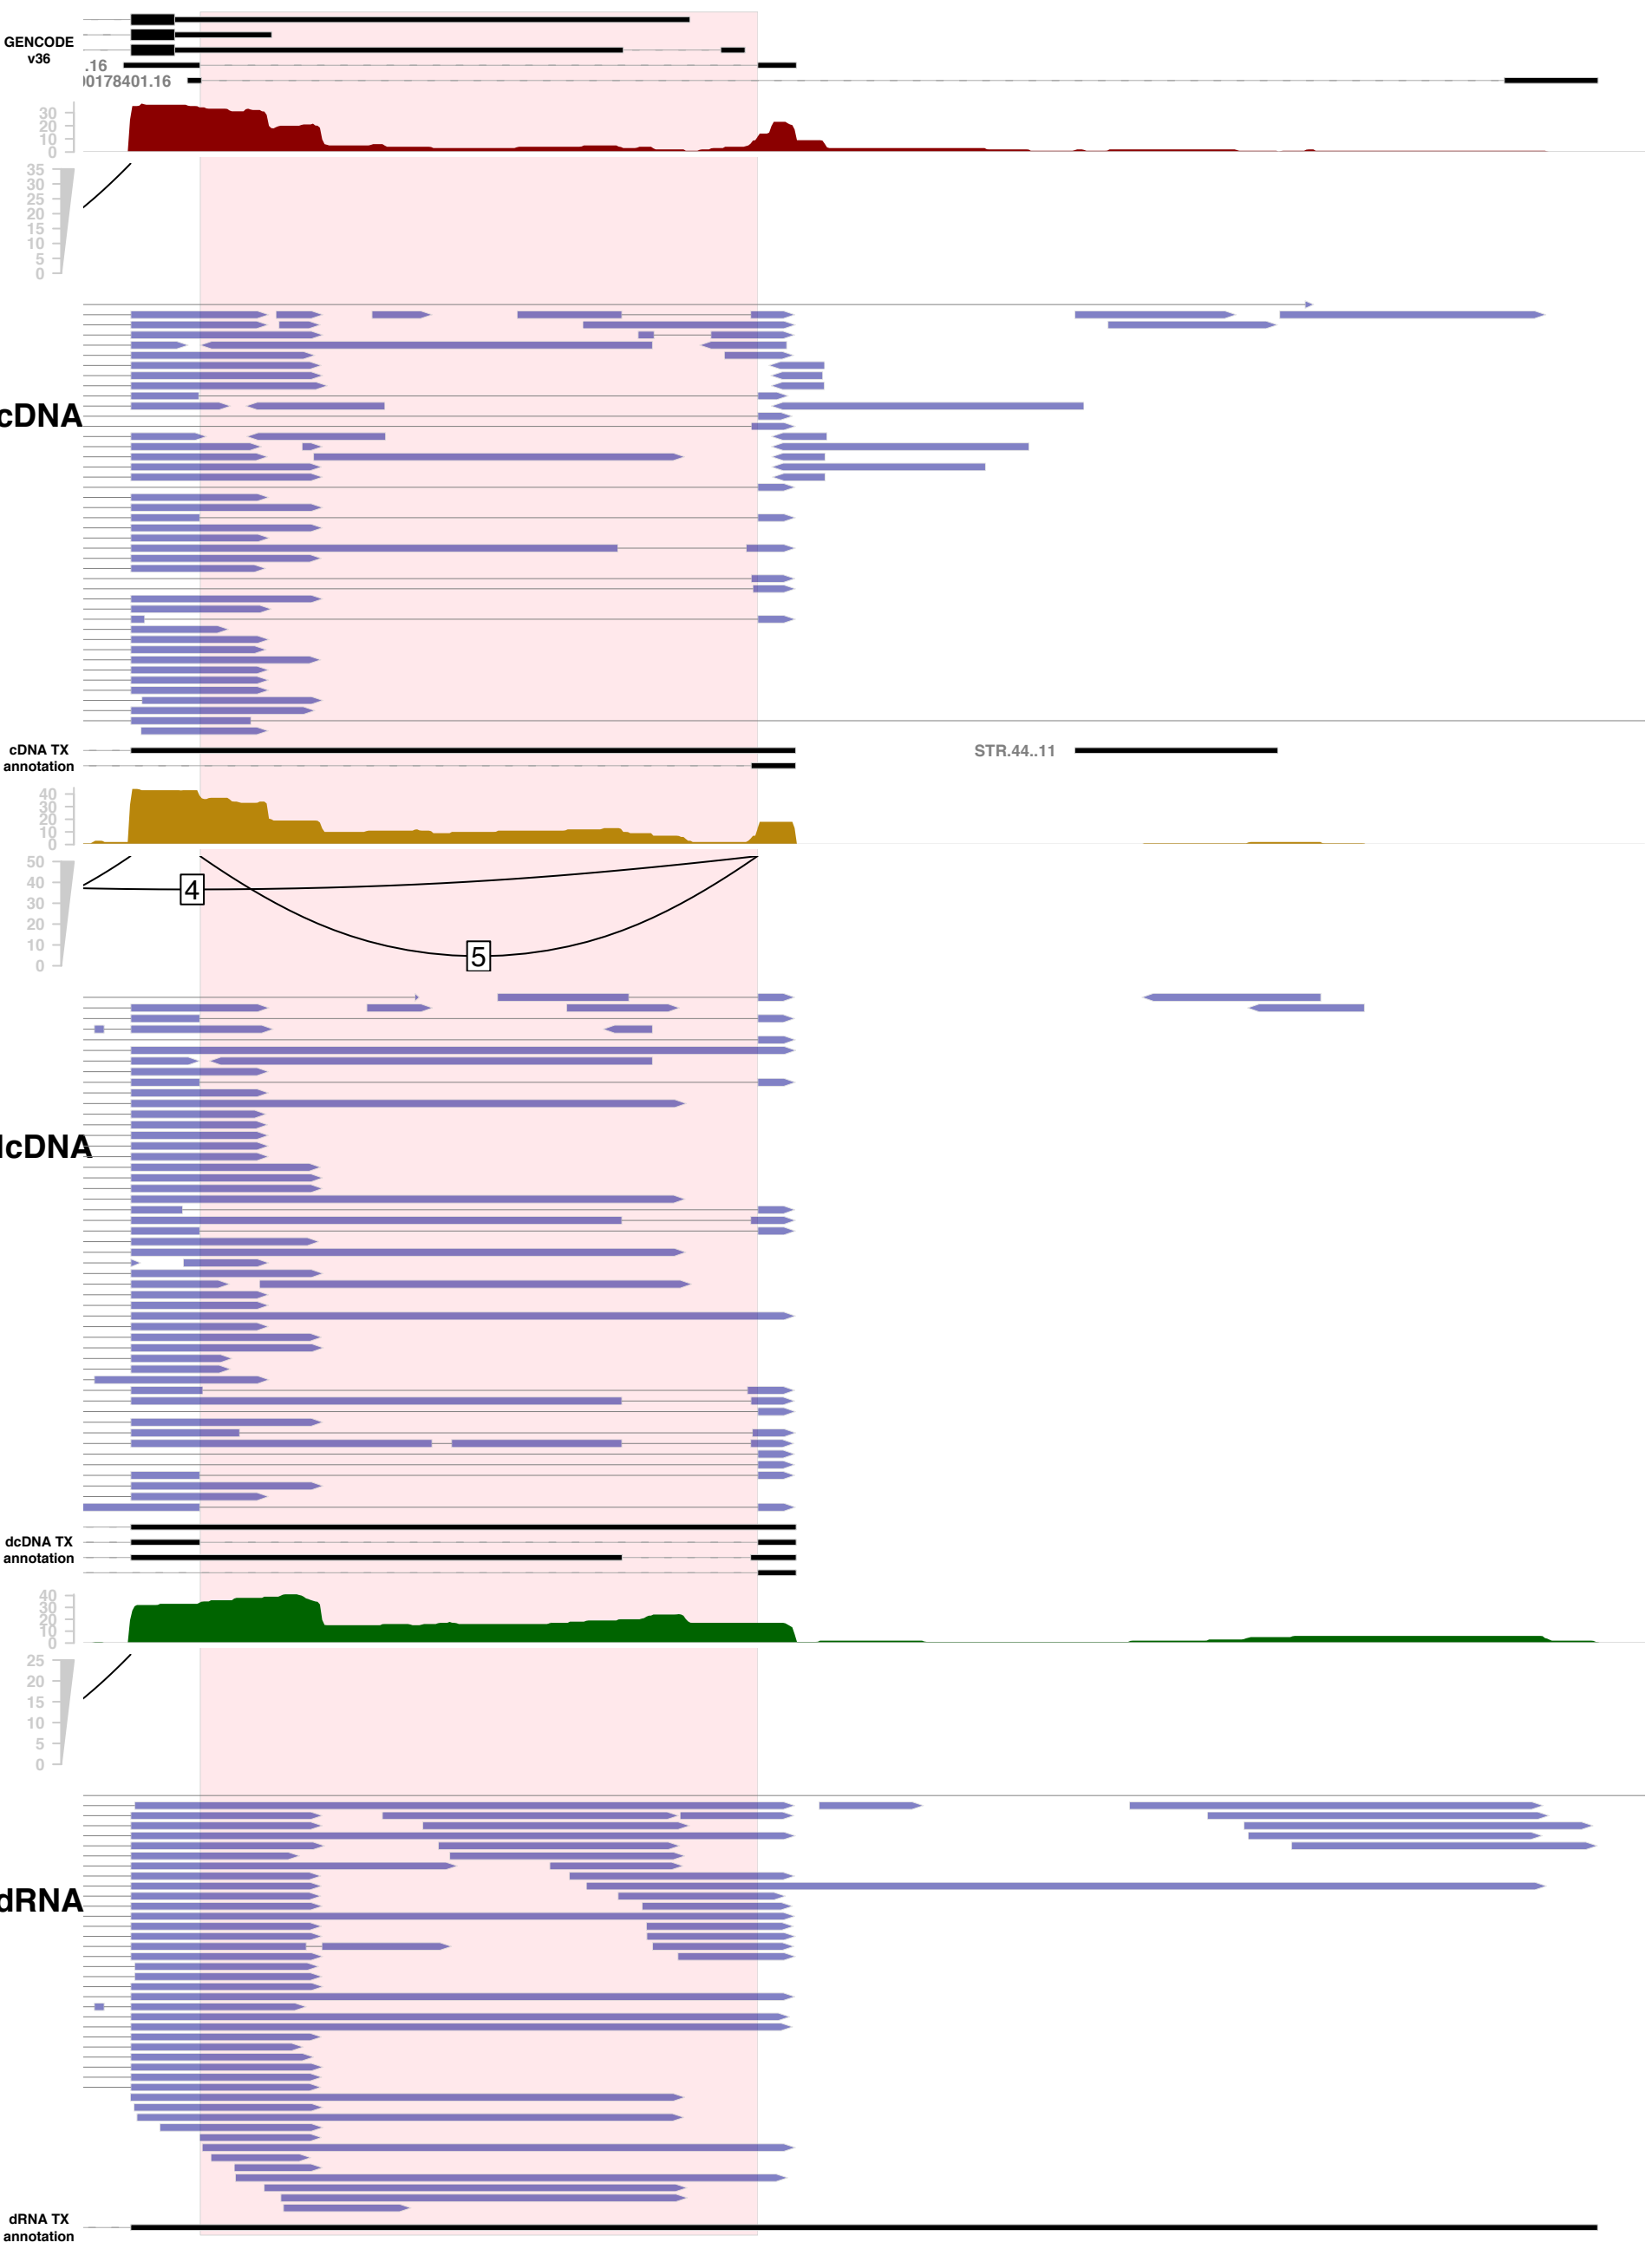

chr12:100626865-100627488:+ GAS2L3

Cell line: Hct116

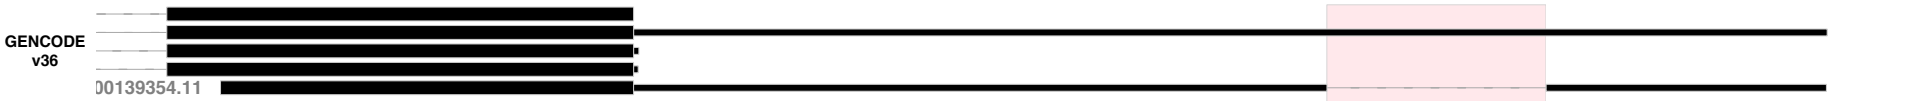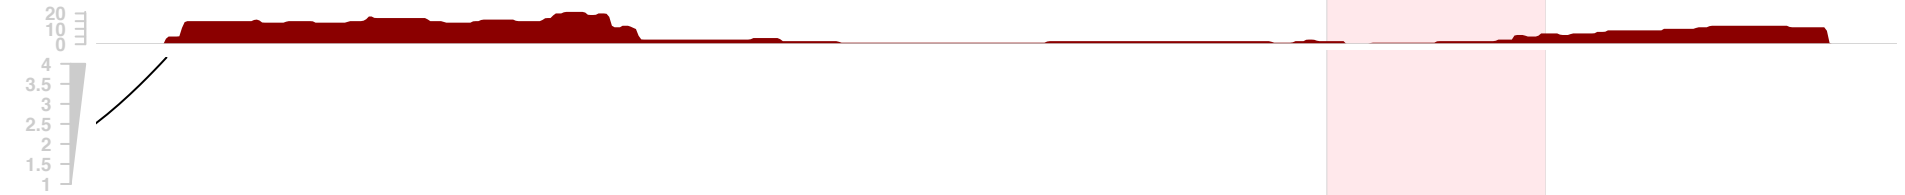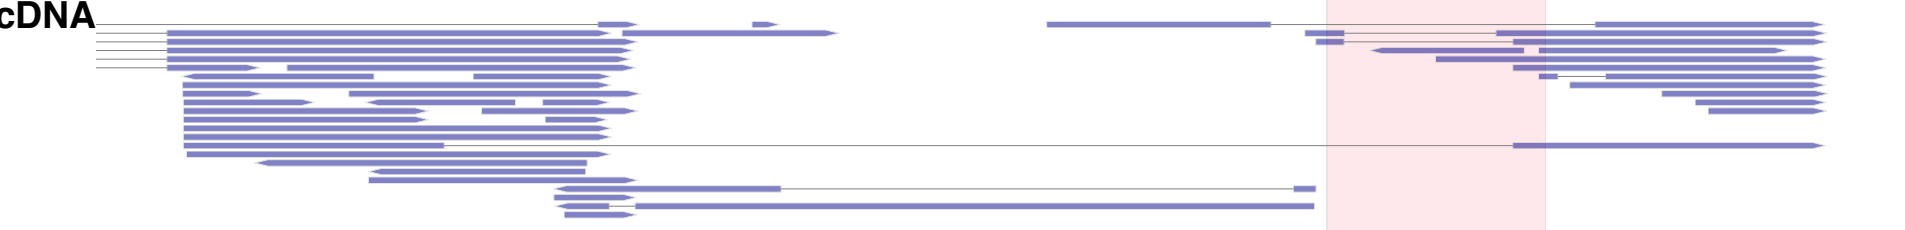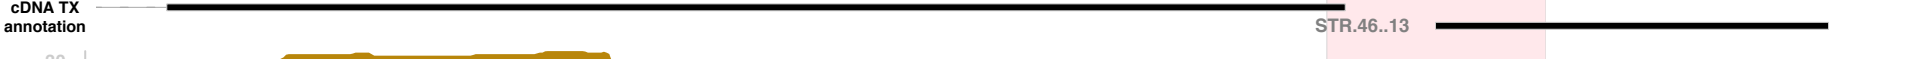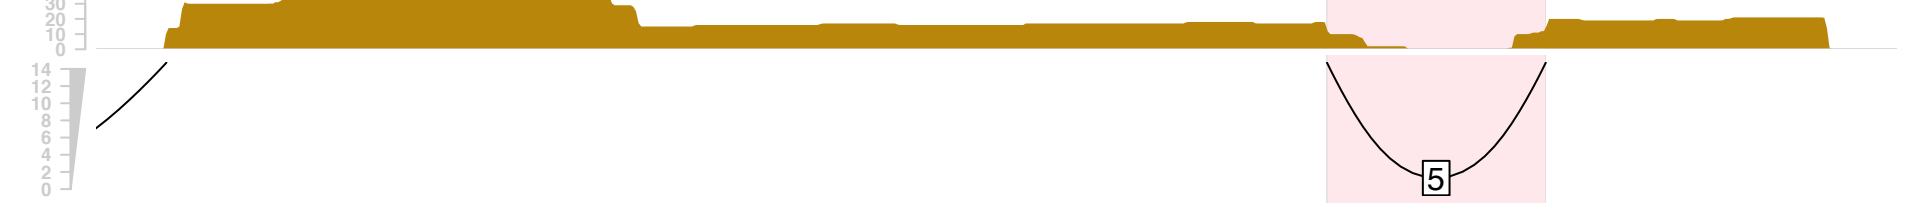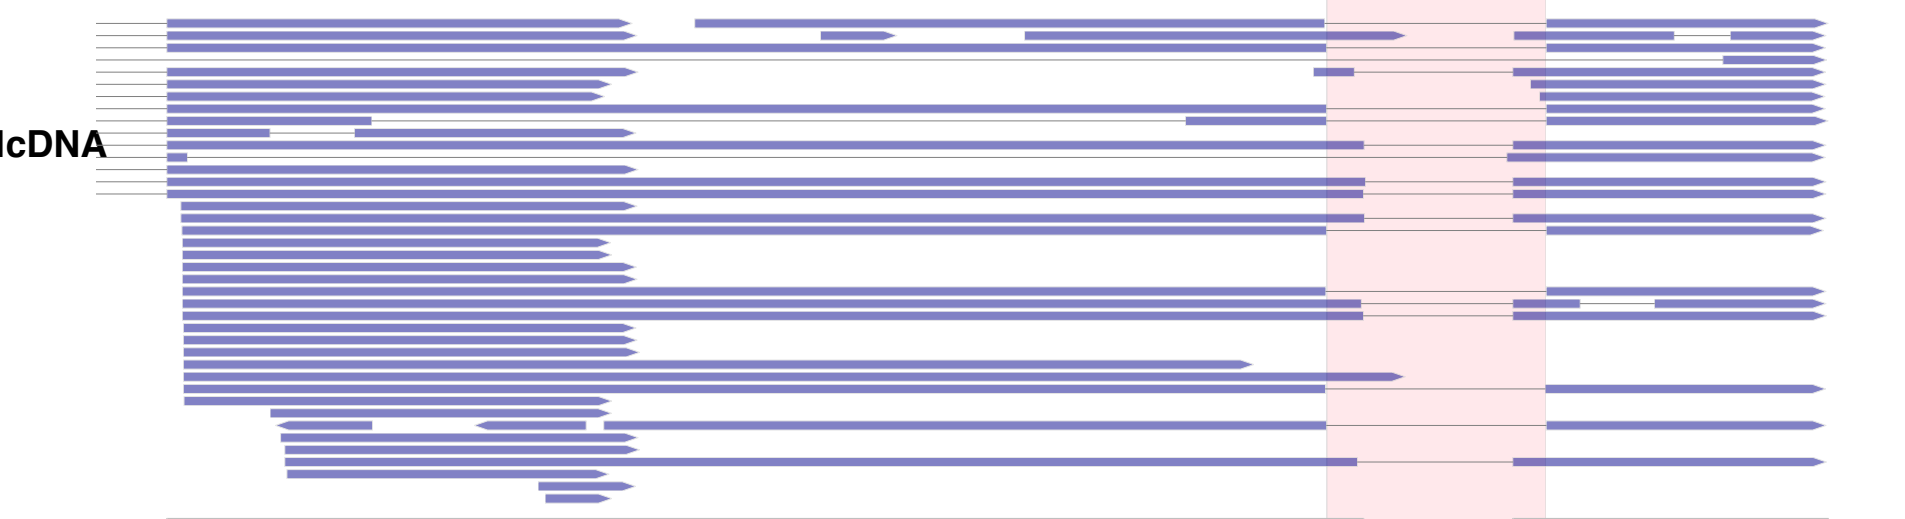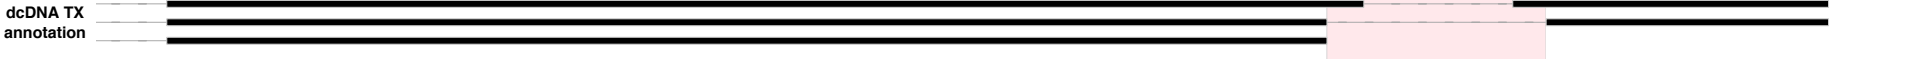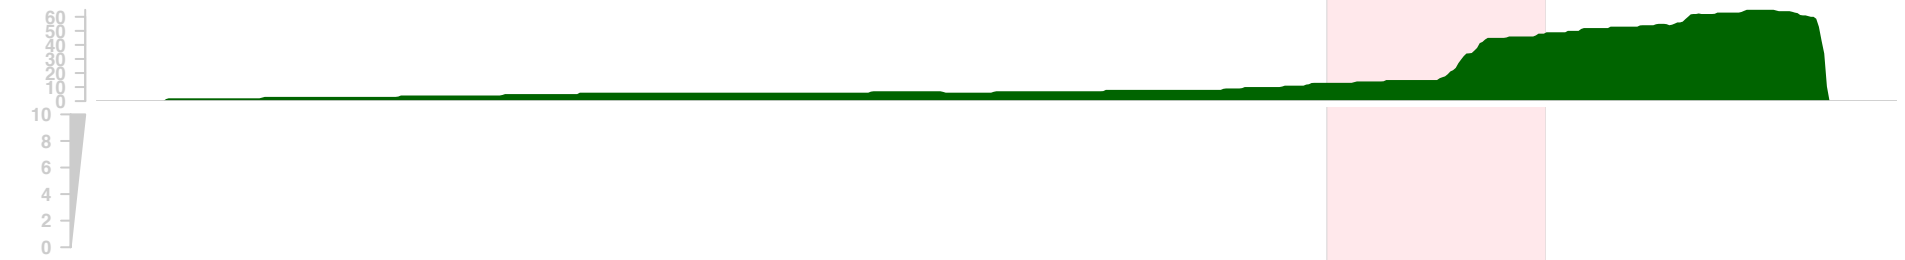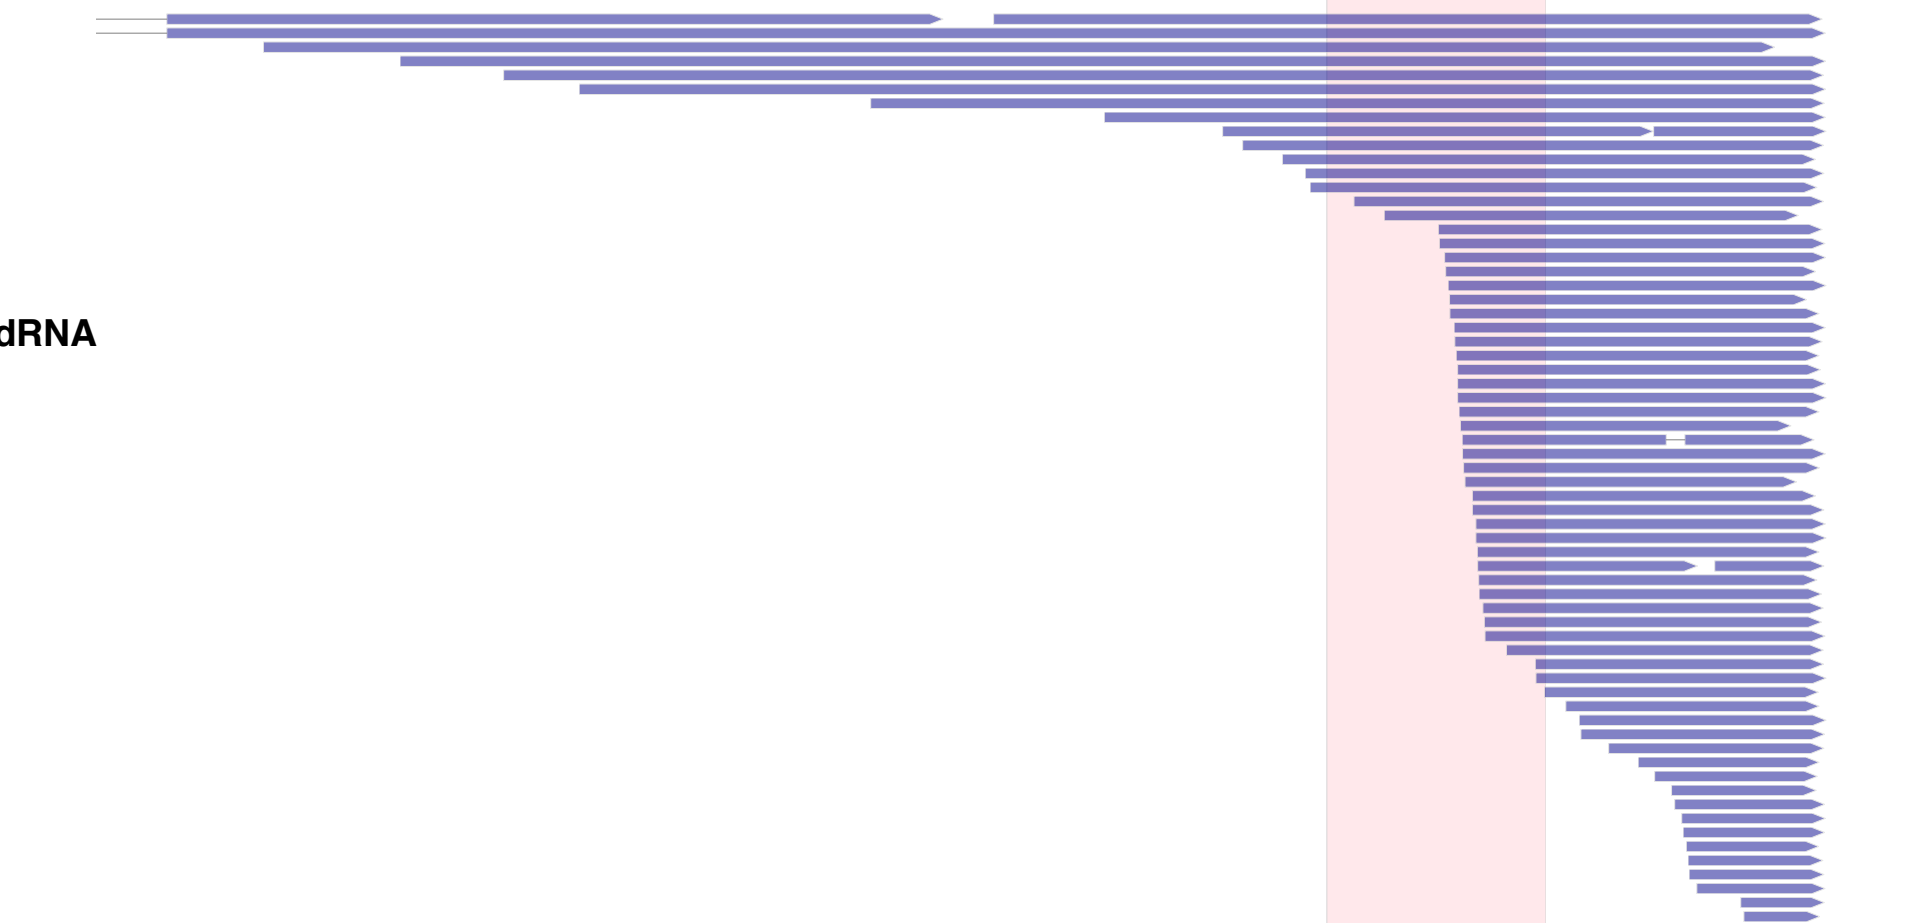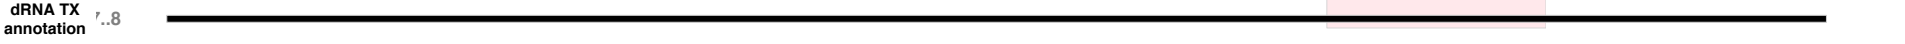



chr13:21374501-21374897:- ZDHHC20

Cell line: Hct116

Direct repeat sequence: CAGC

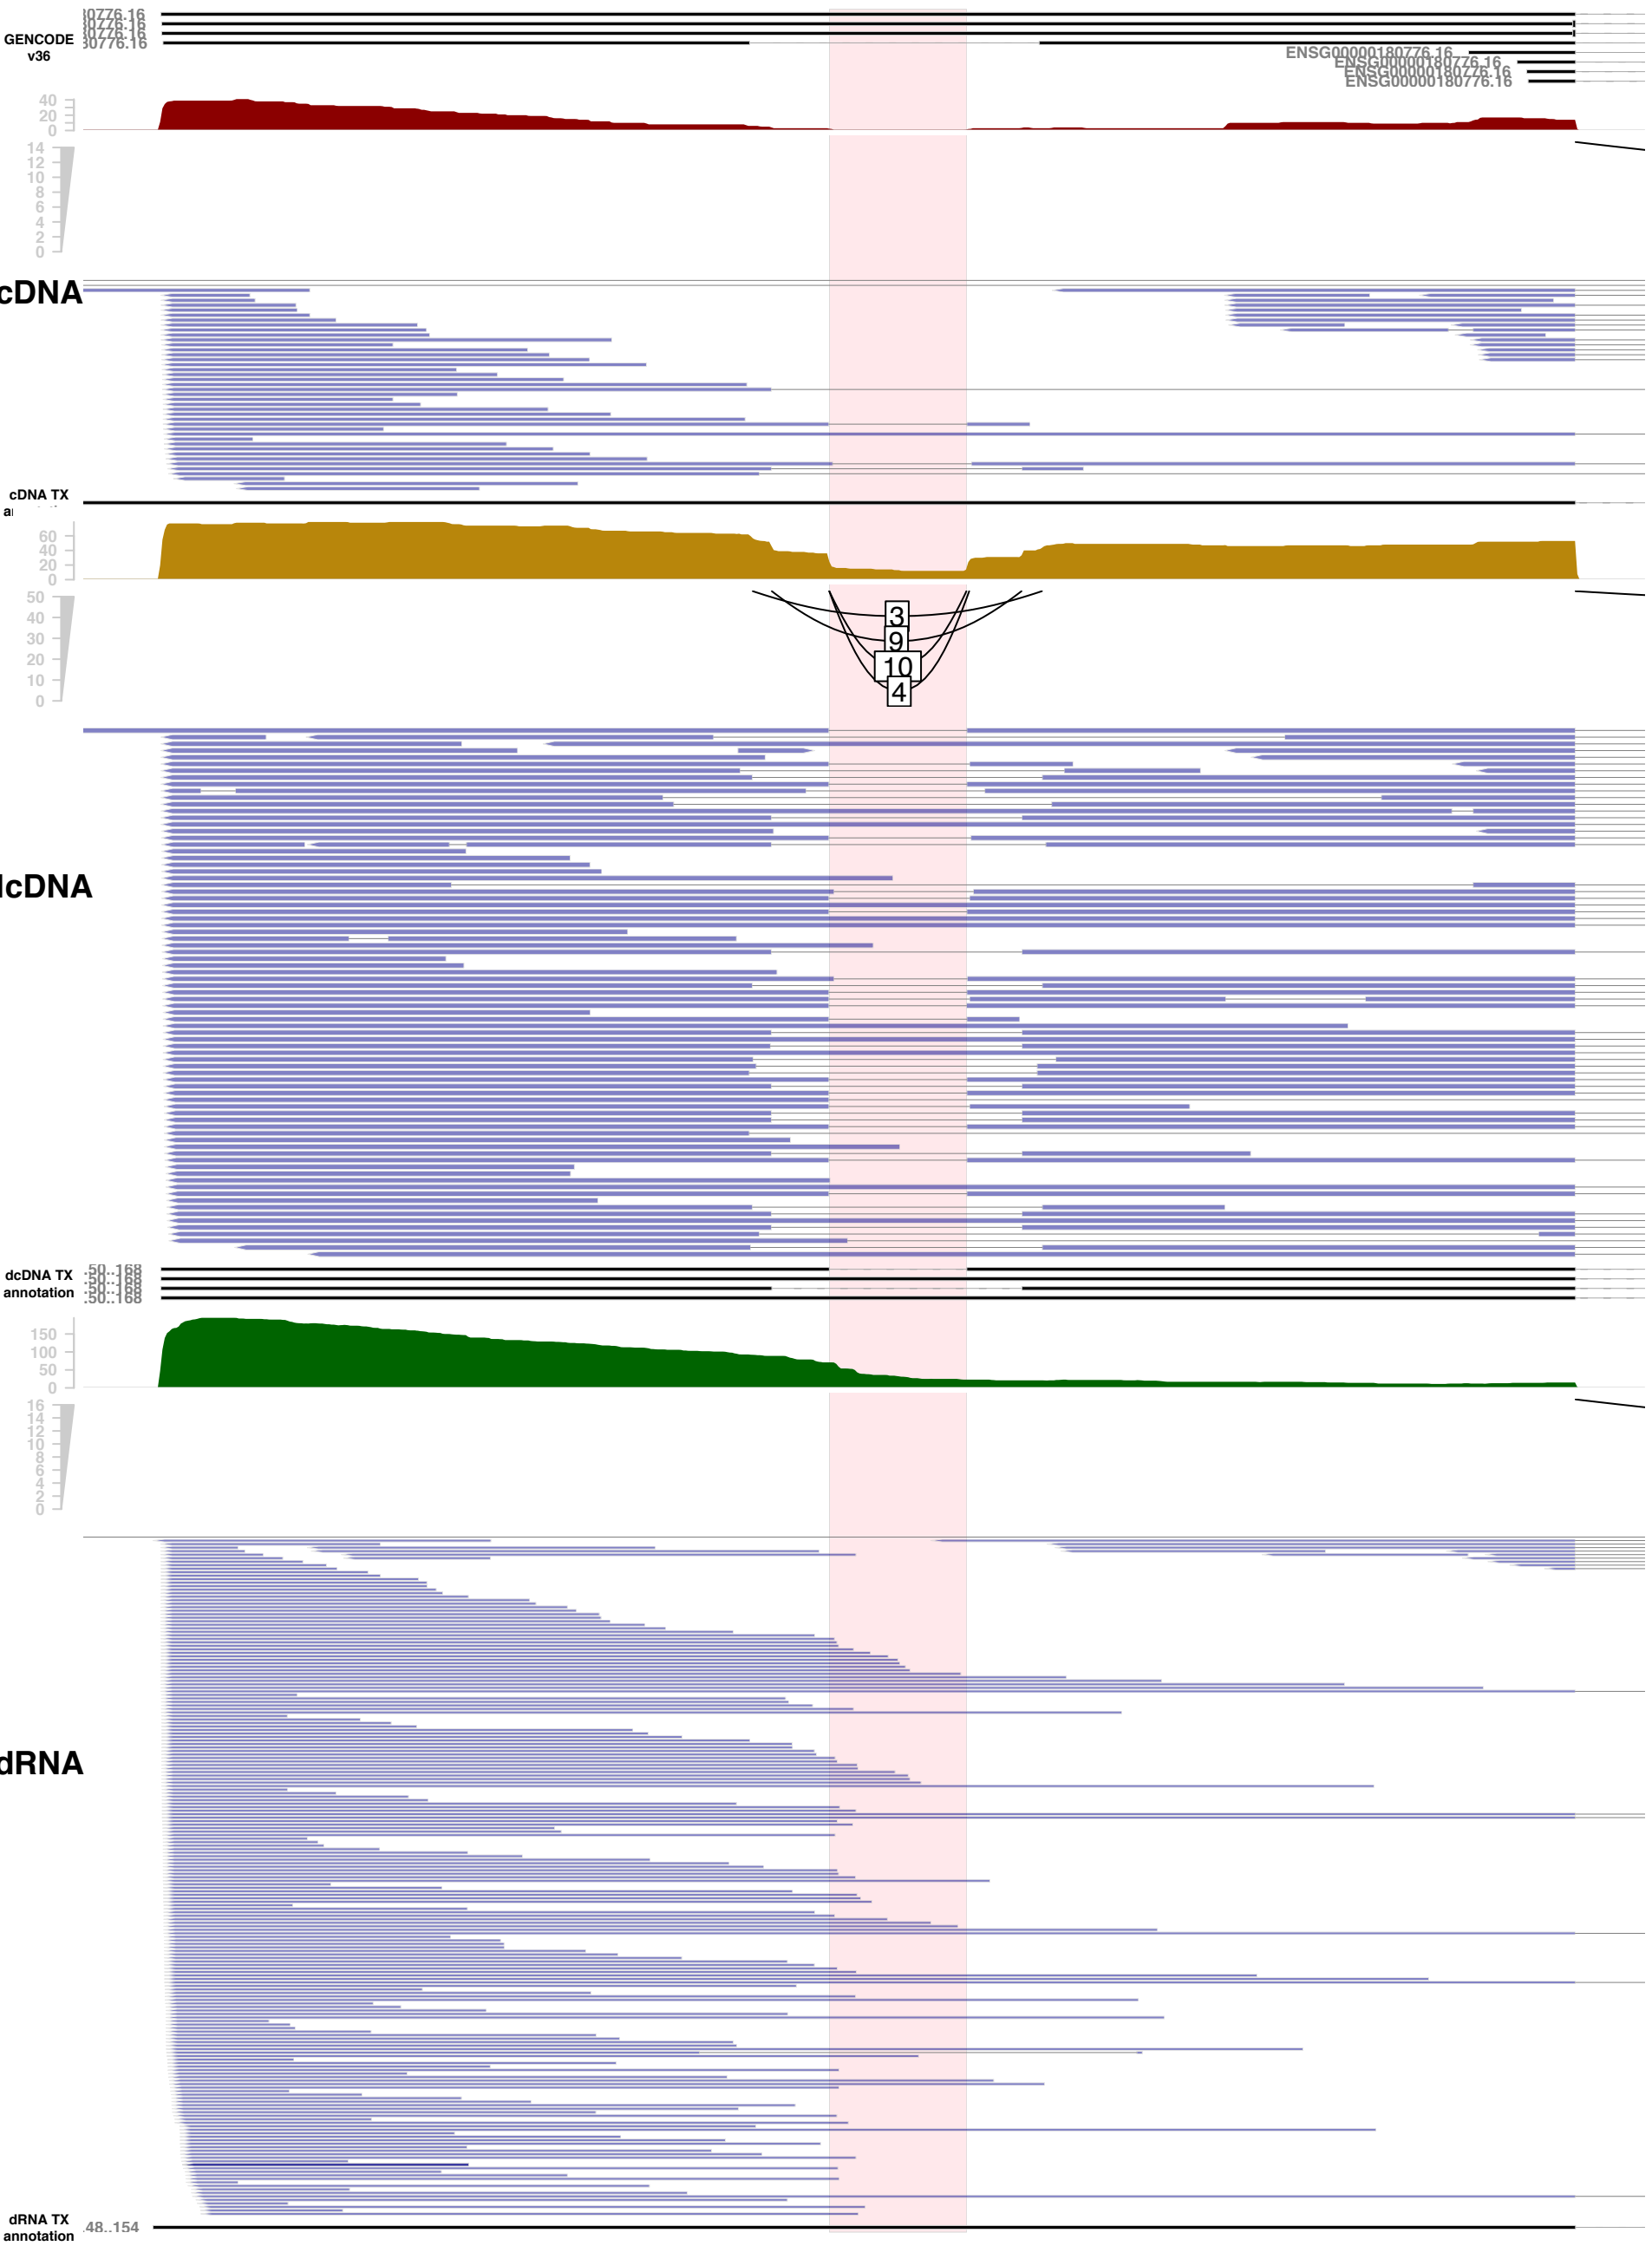

chr14:21460346-21460977:- RAB2B

Cell line: Hct116

Direct repeat sequence: CCTCC

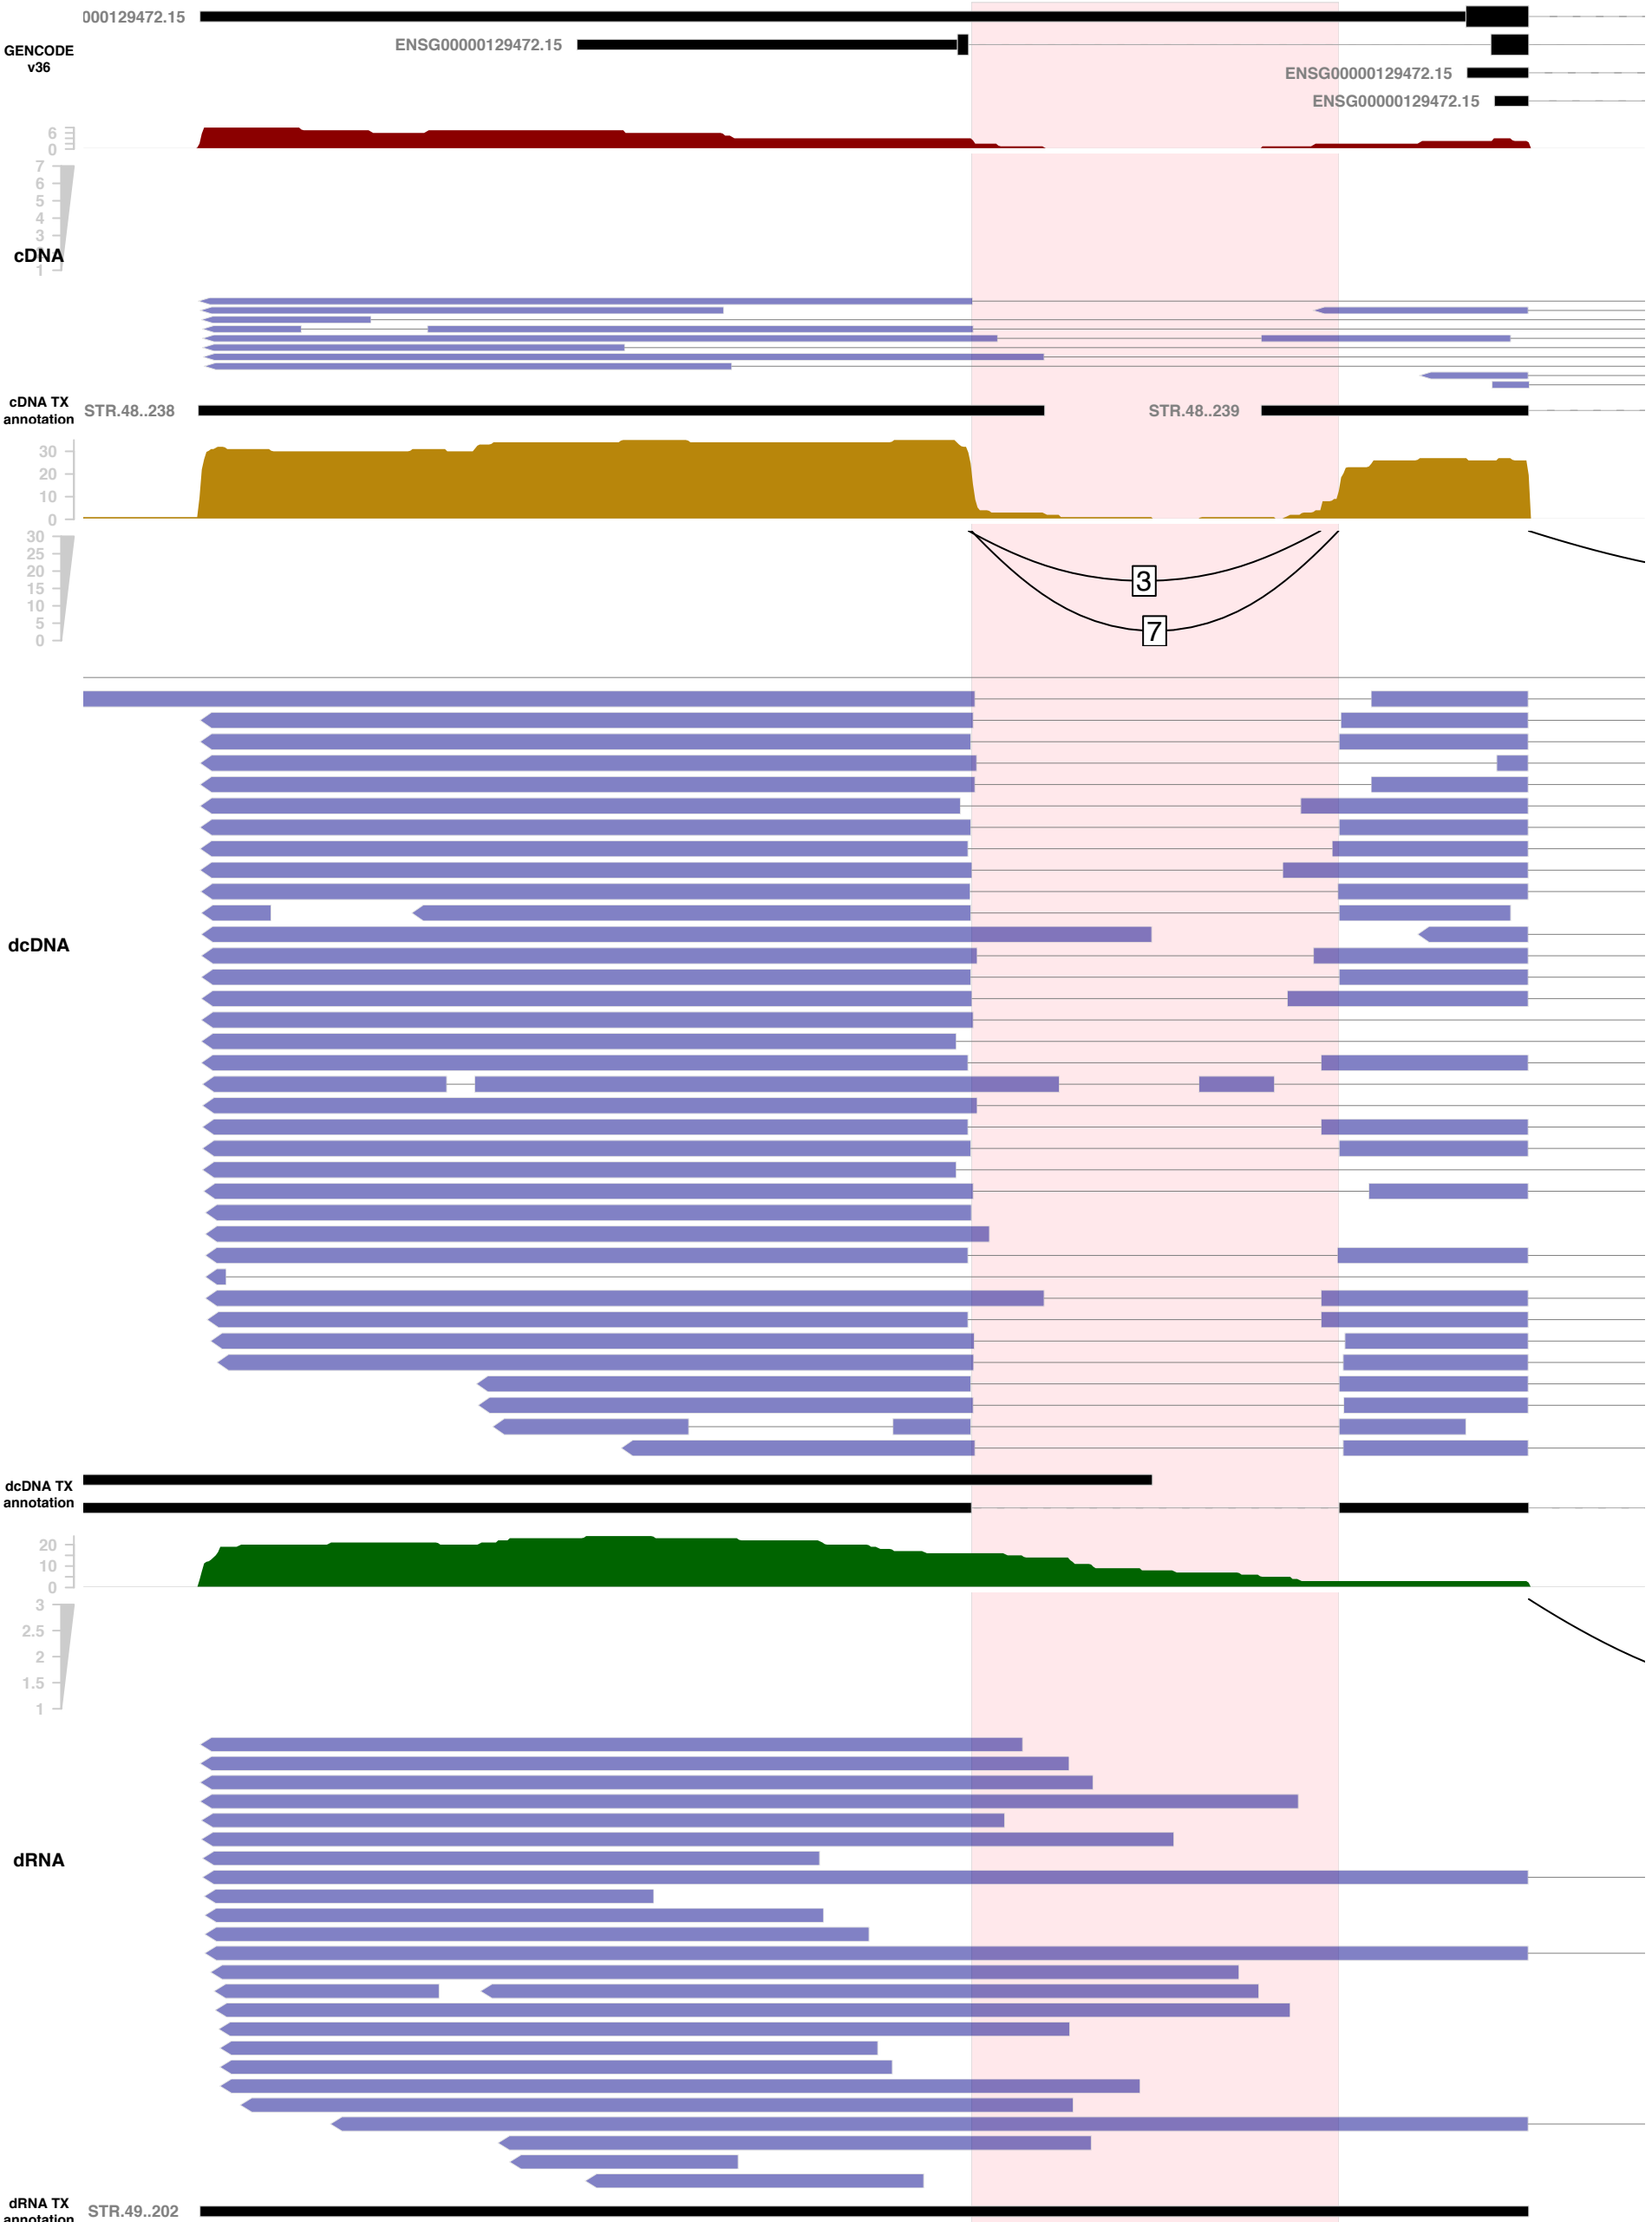

chr15:74843795-74844892:- SCAMP2

Cell line: Hct116

Direct repeat sequence: CCCCTCTATGTACAAA

GENCODE v36  
ENSG00000140497.16  
ENSG00000140497.16  
ENSG00000140497.16  
ENSG00000140497.16

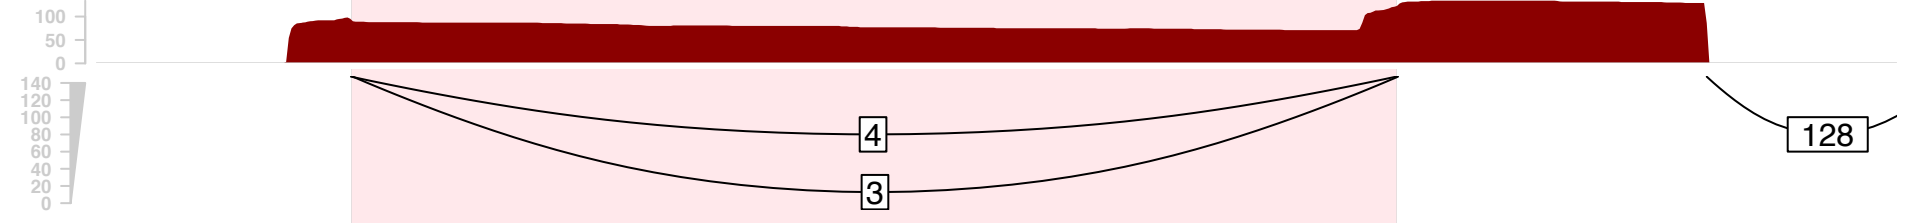

cDNA

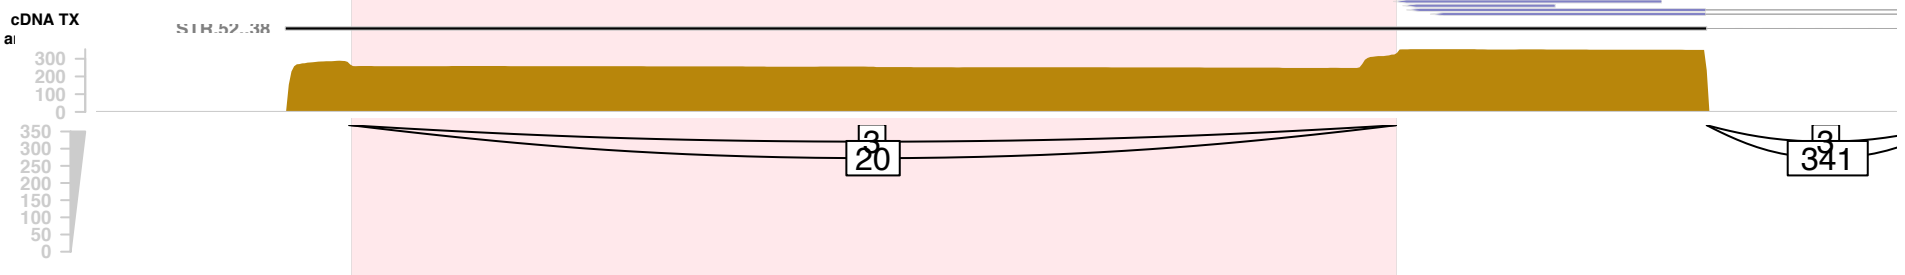

cDNA

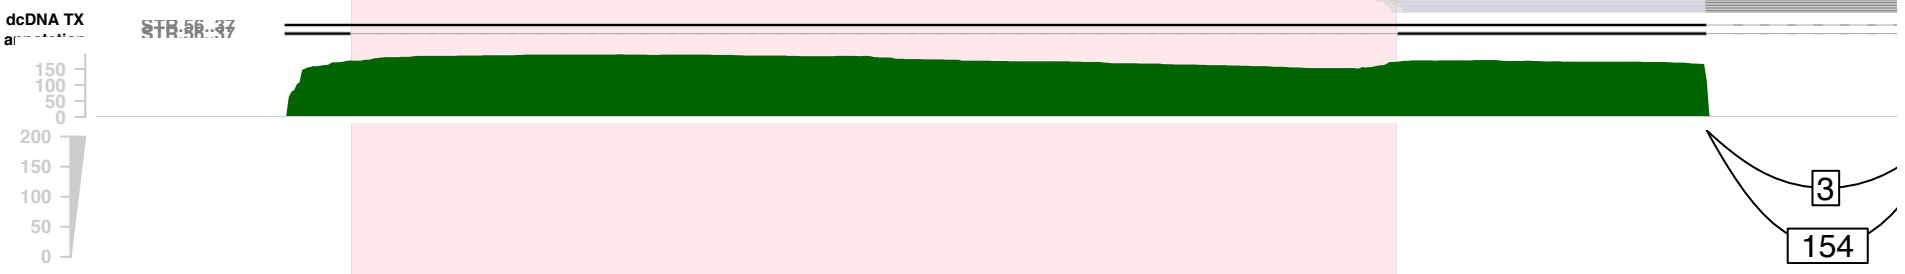

dRNA

dRNA TX annotation  
STR:53..40

chr17:3663567-3663637:- TAX1BP3,P2RX5-TAX1BP3

Cell line: Hct116

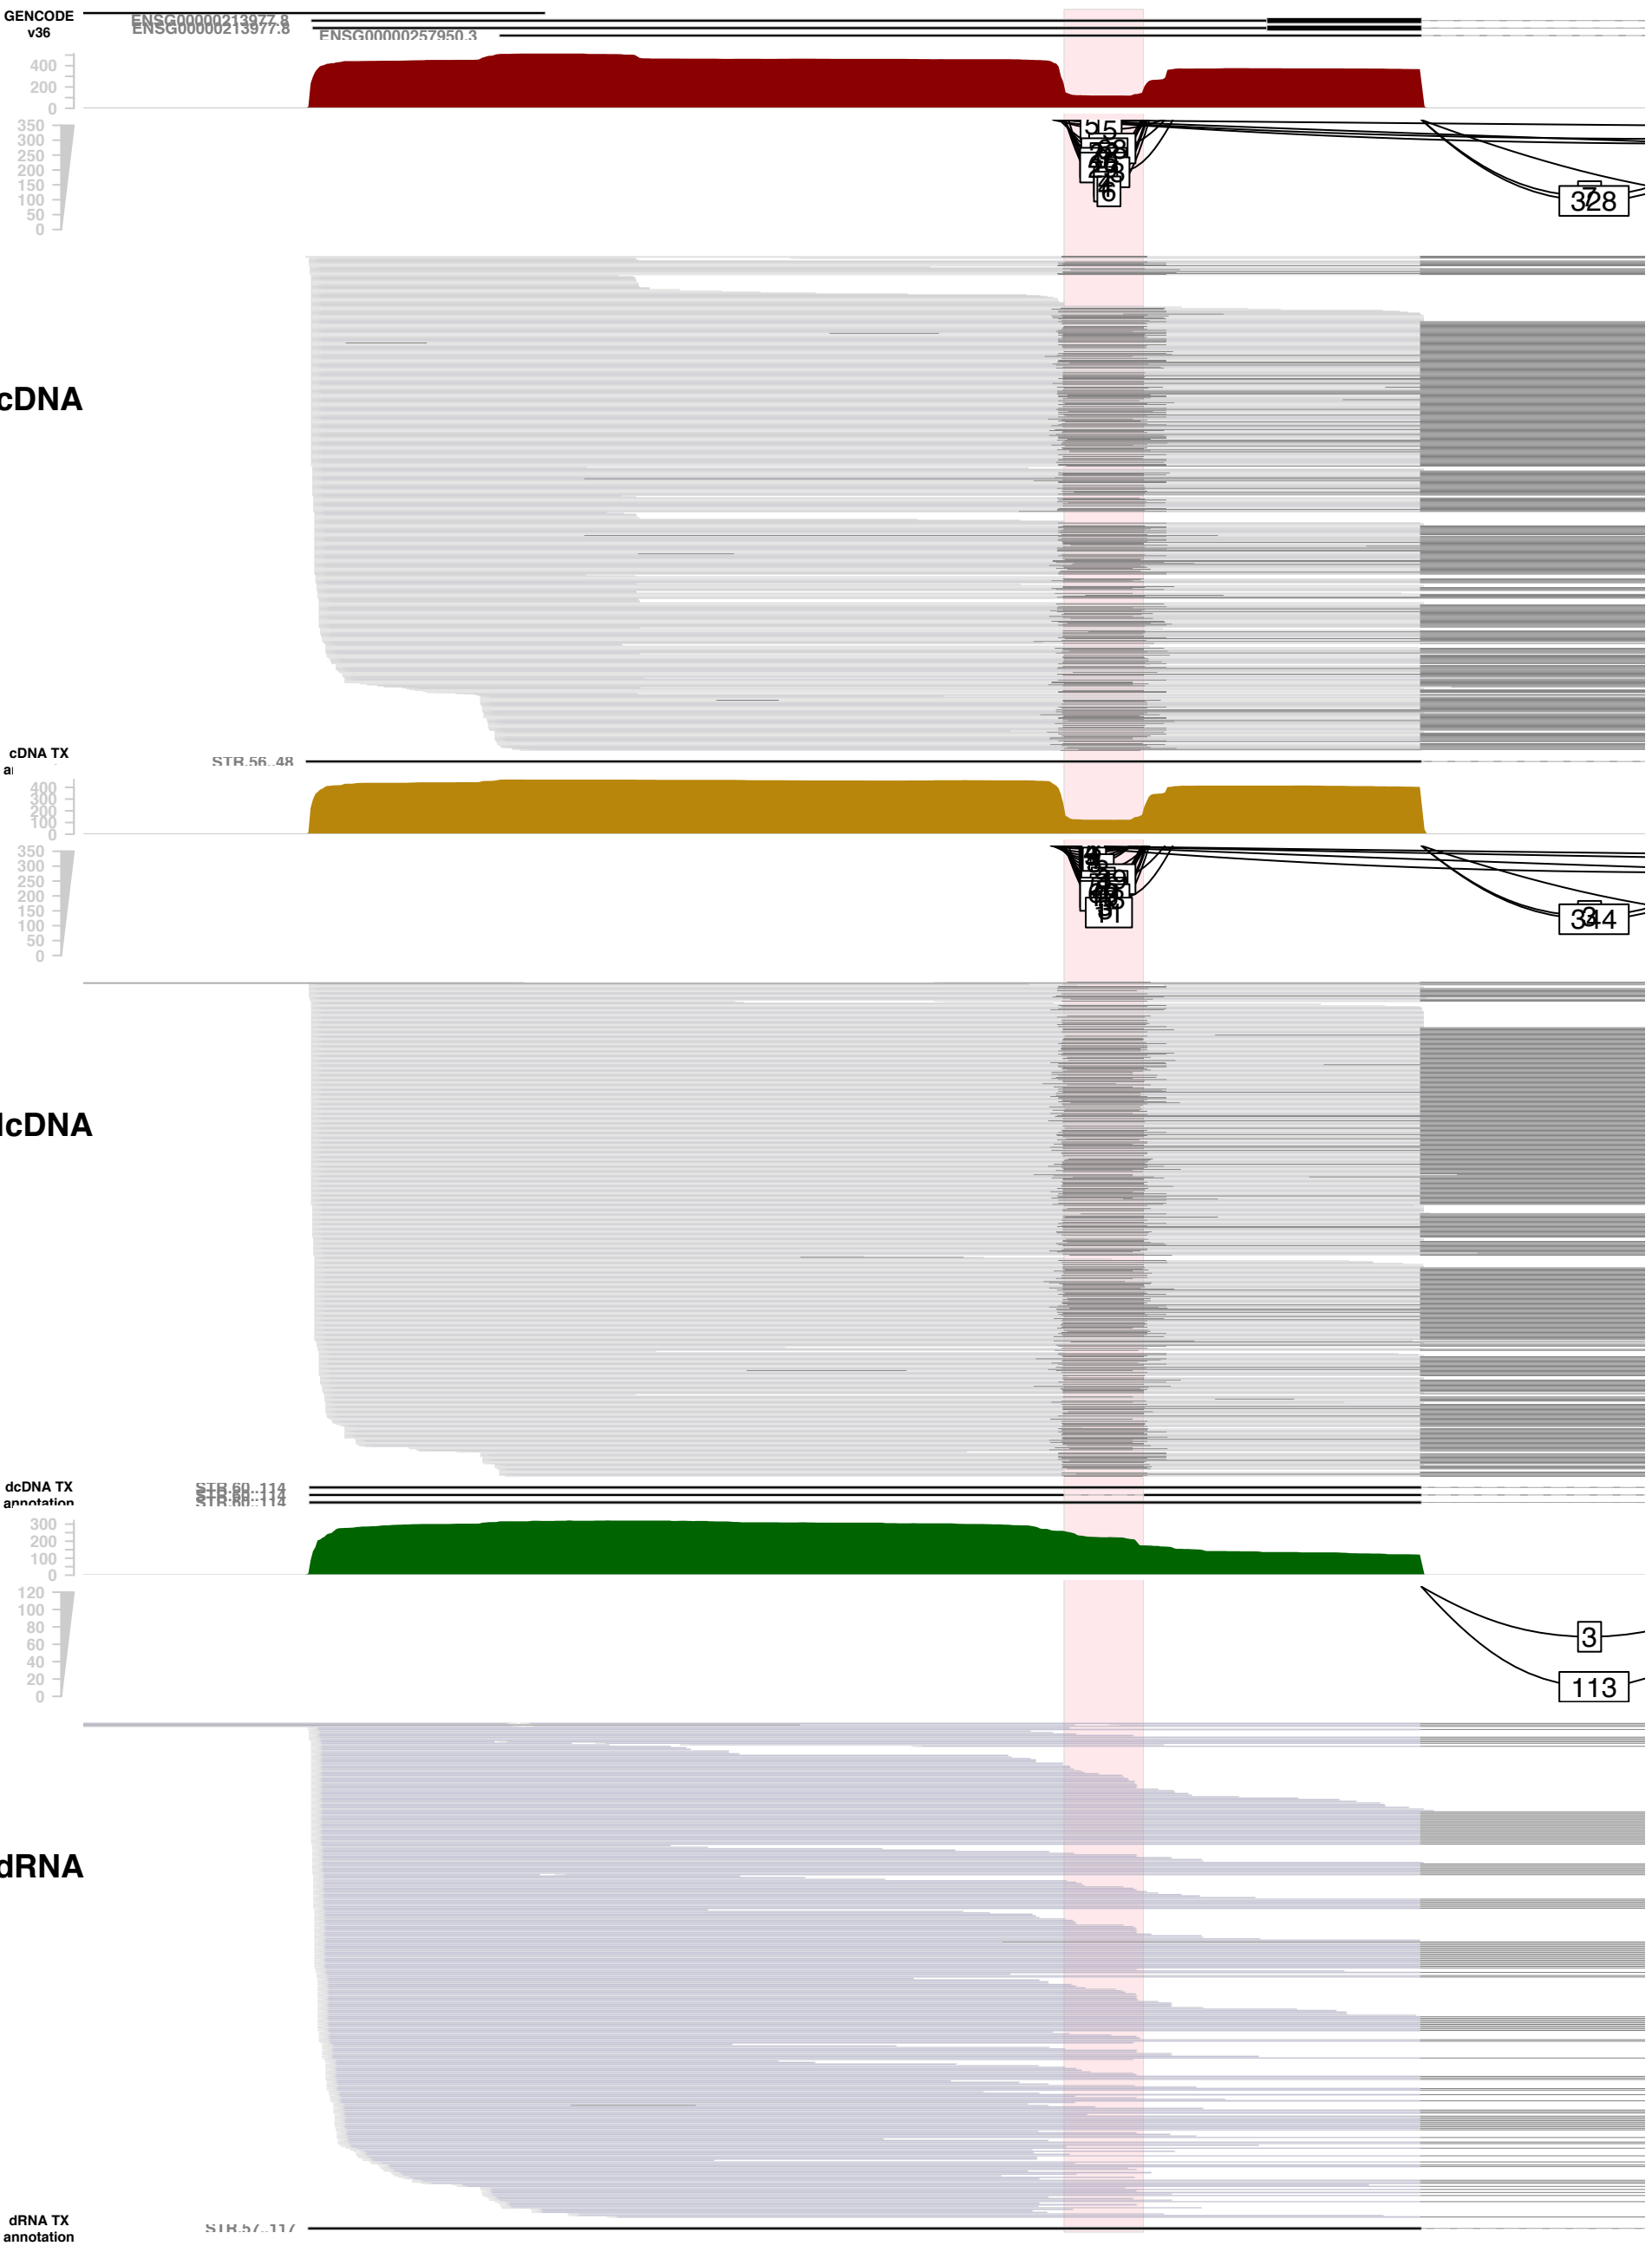

chr1:220057918-220058829:- BPNT1

Cell line: Hct116

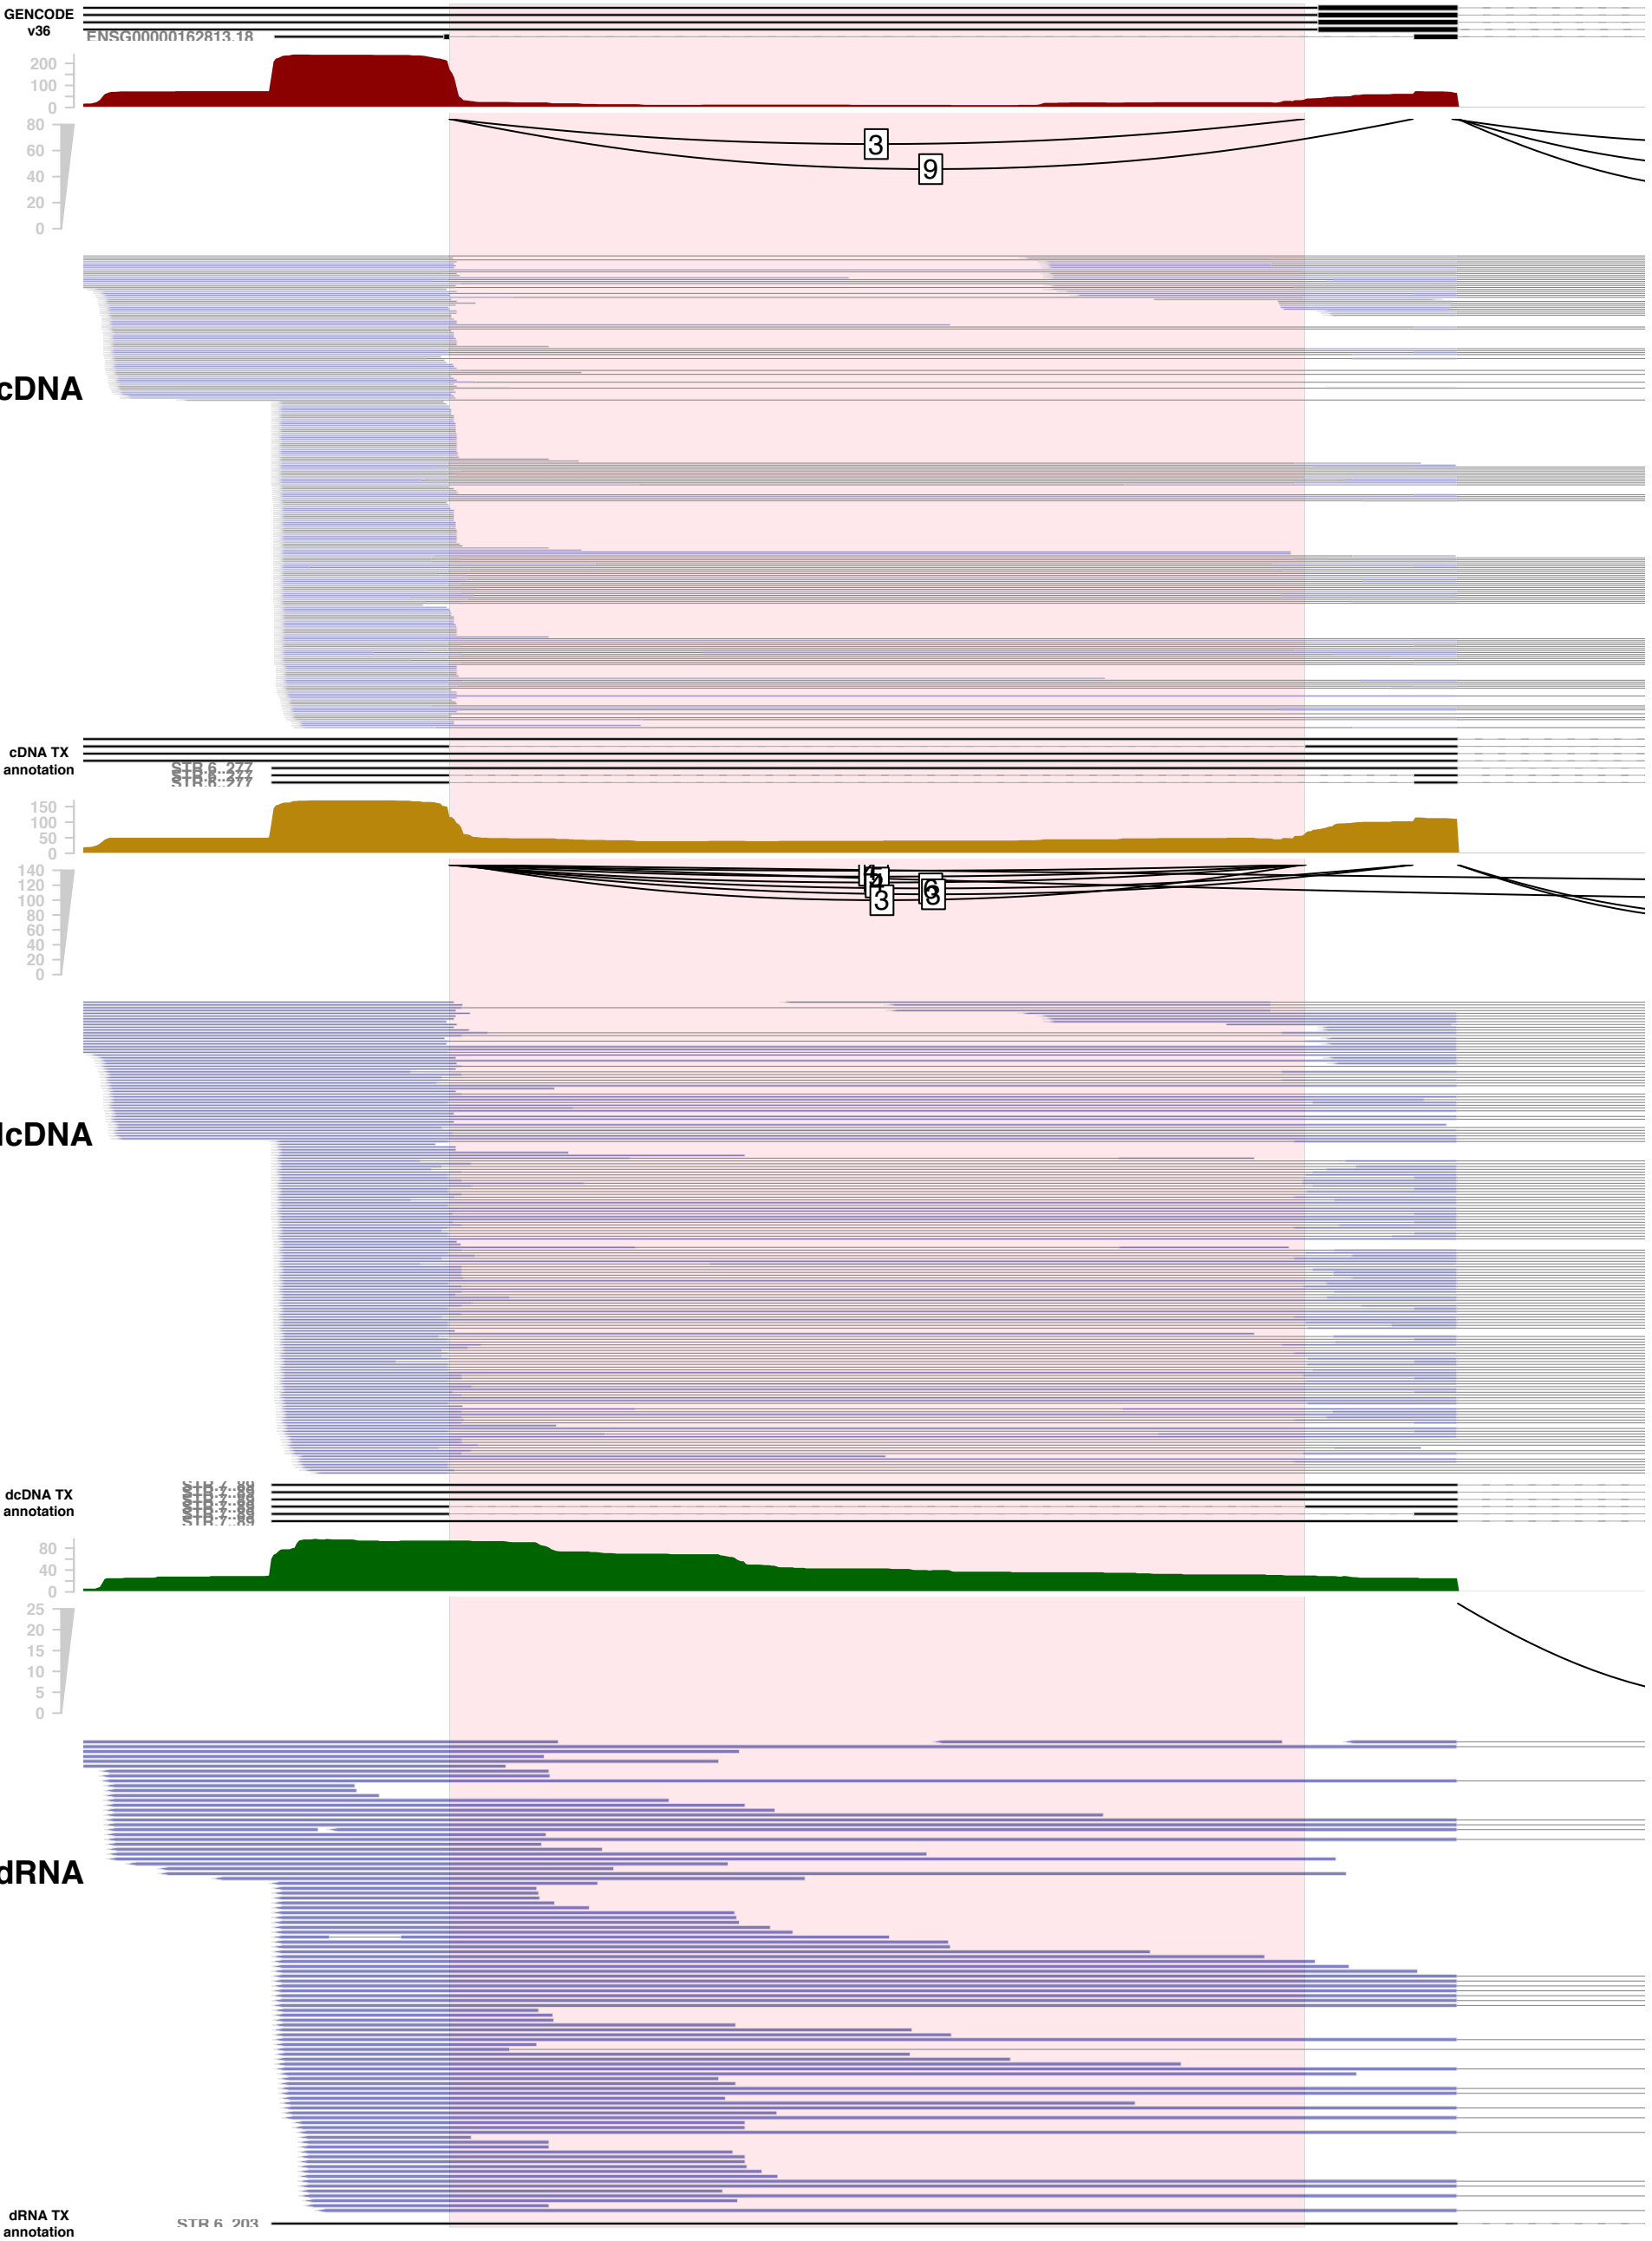



chr17:47118517-47118594:- CDC27

Cell line: Hct116

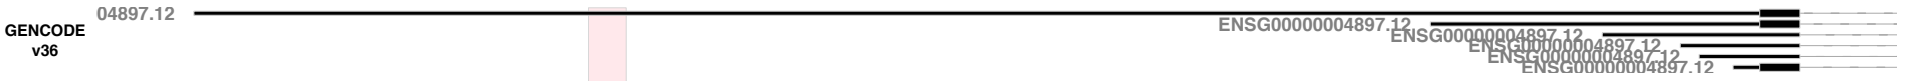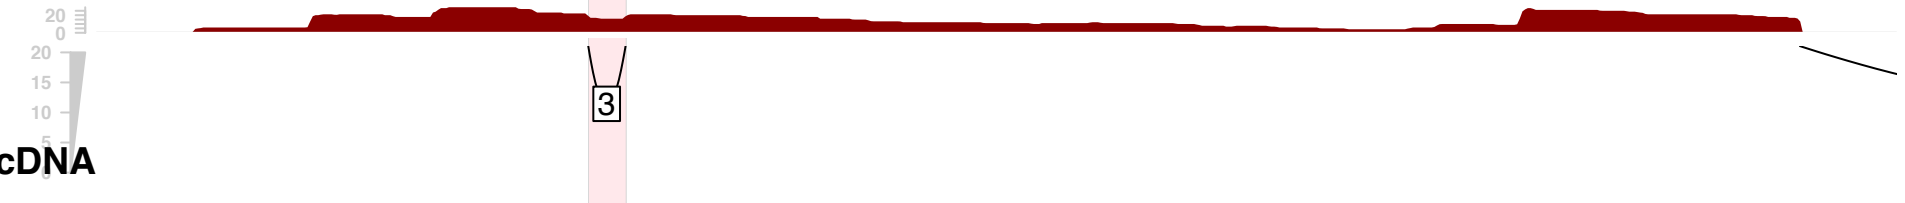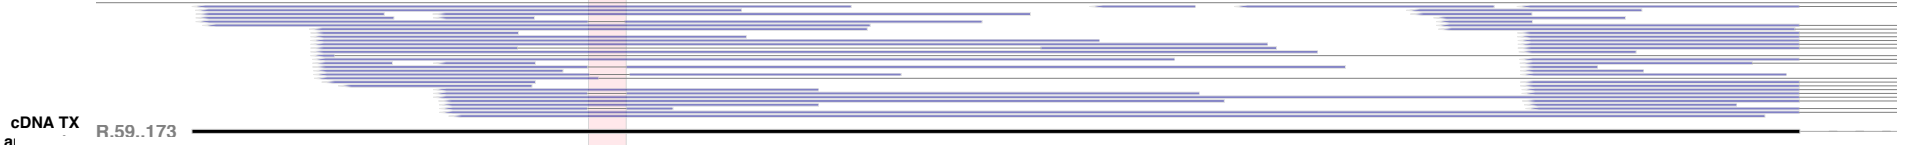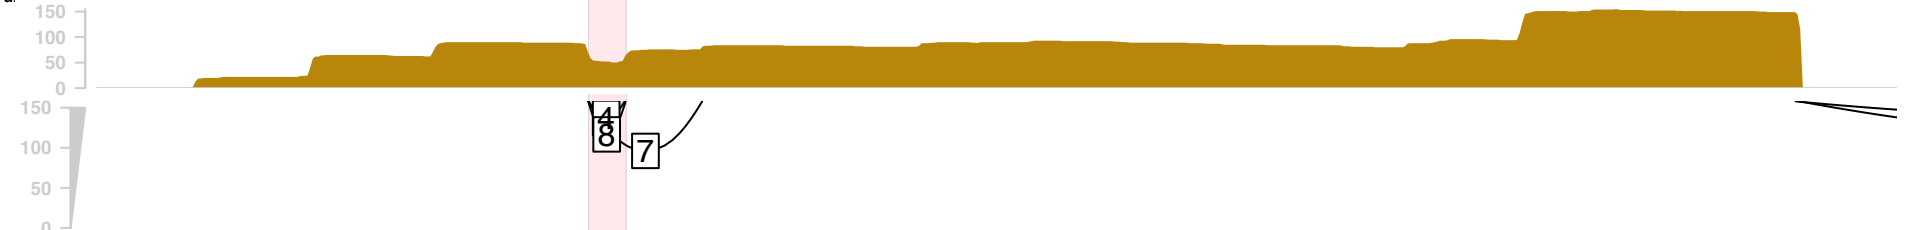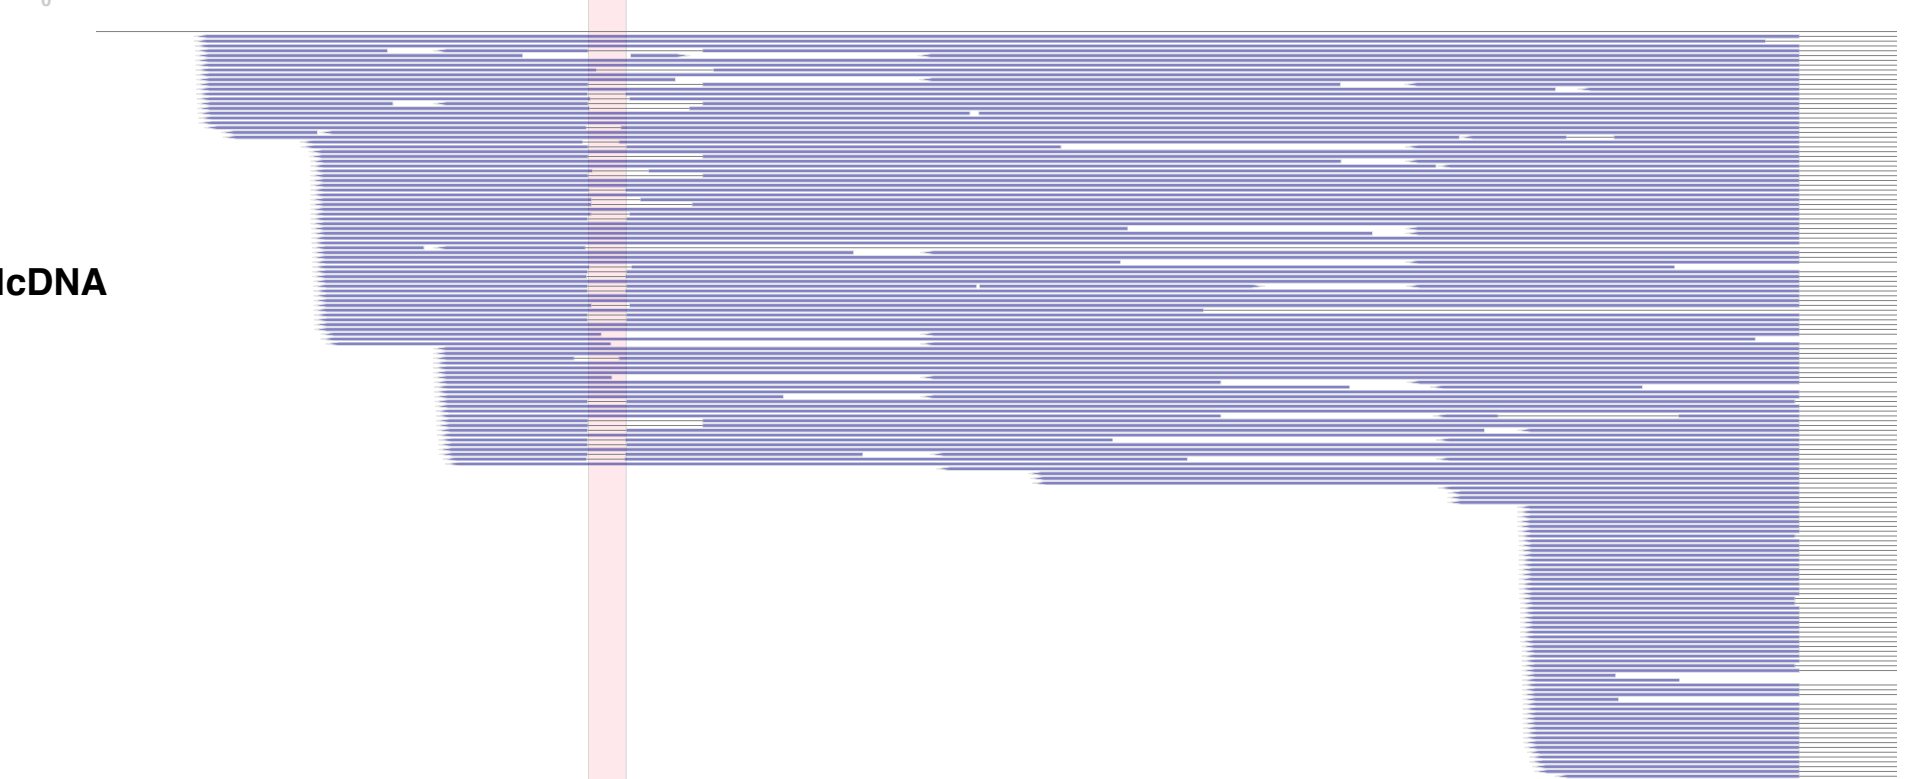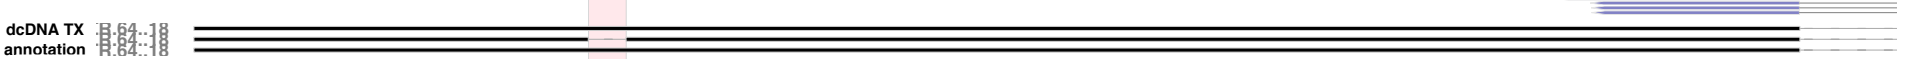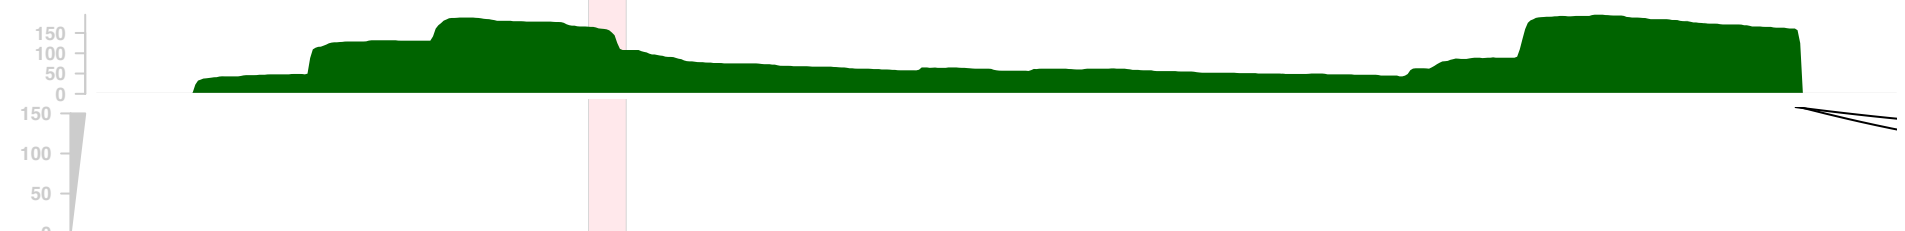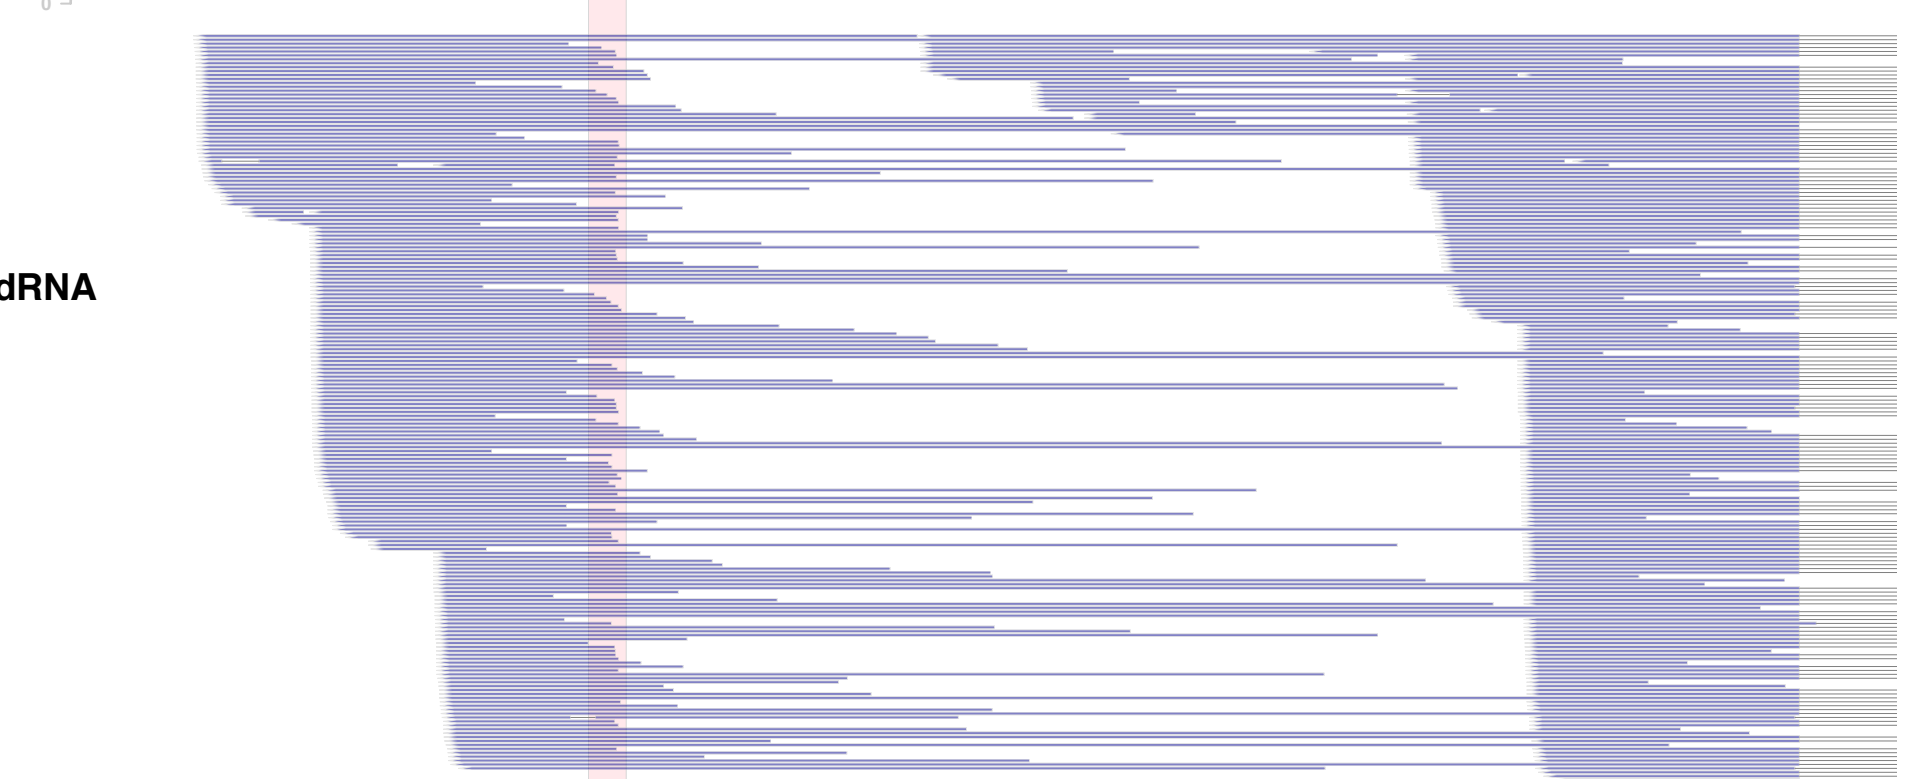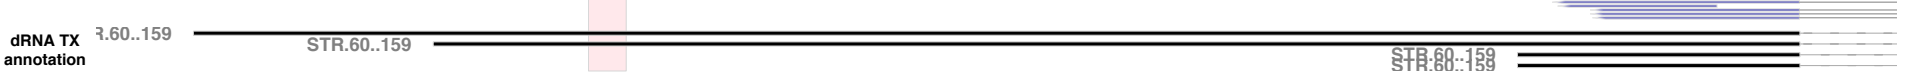

chr17:57680745-57680893:+ MSI2

Cell line: Hct116

Direct repeat sequence: CCTG

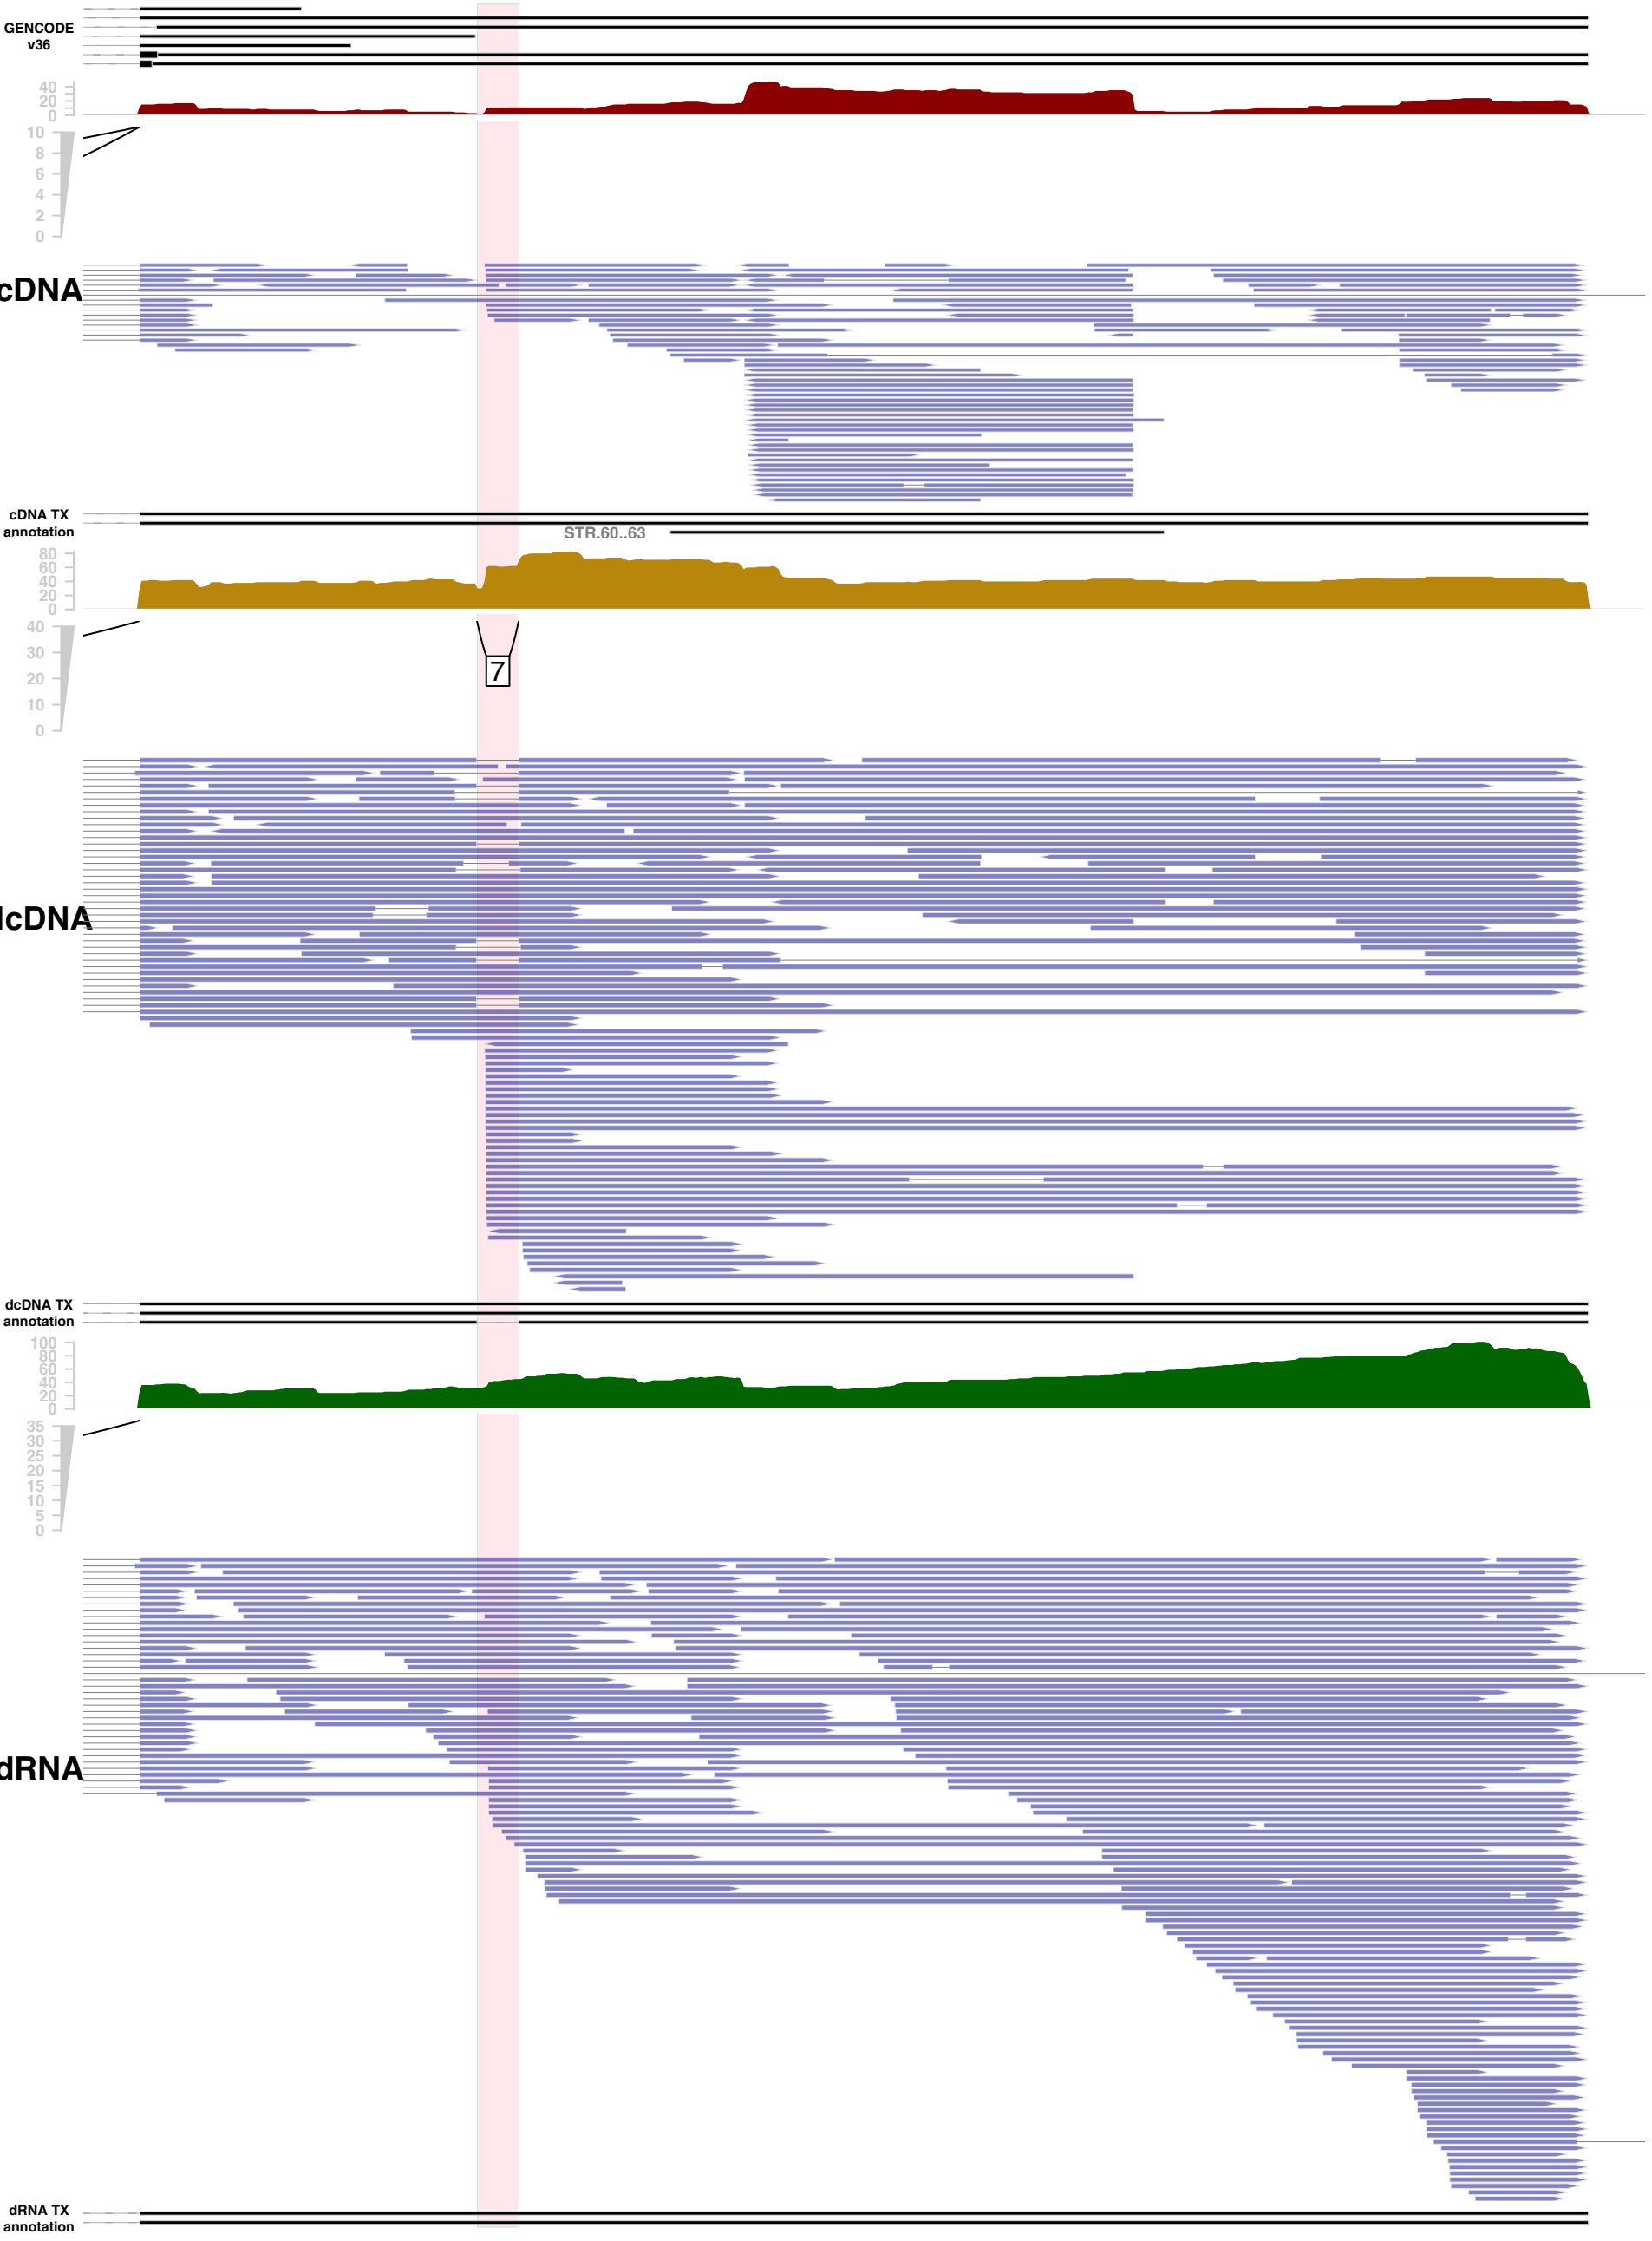

chr20:45883263-45884986:+ ZSWIM1

Cell line: Hct116

Direct repeat sequence: CTCCAGCC

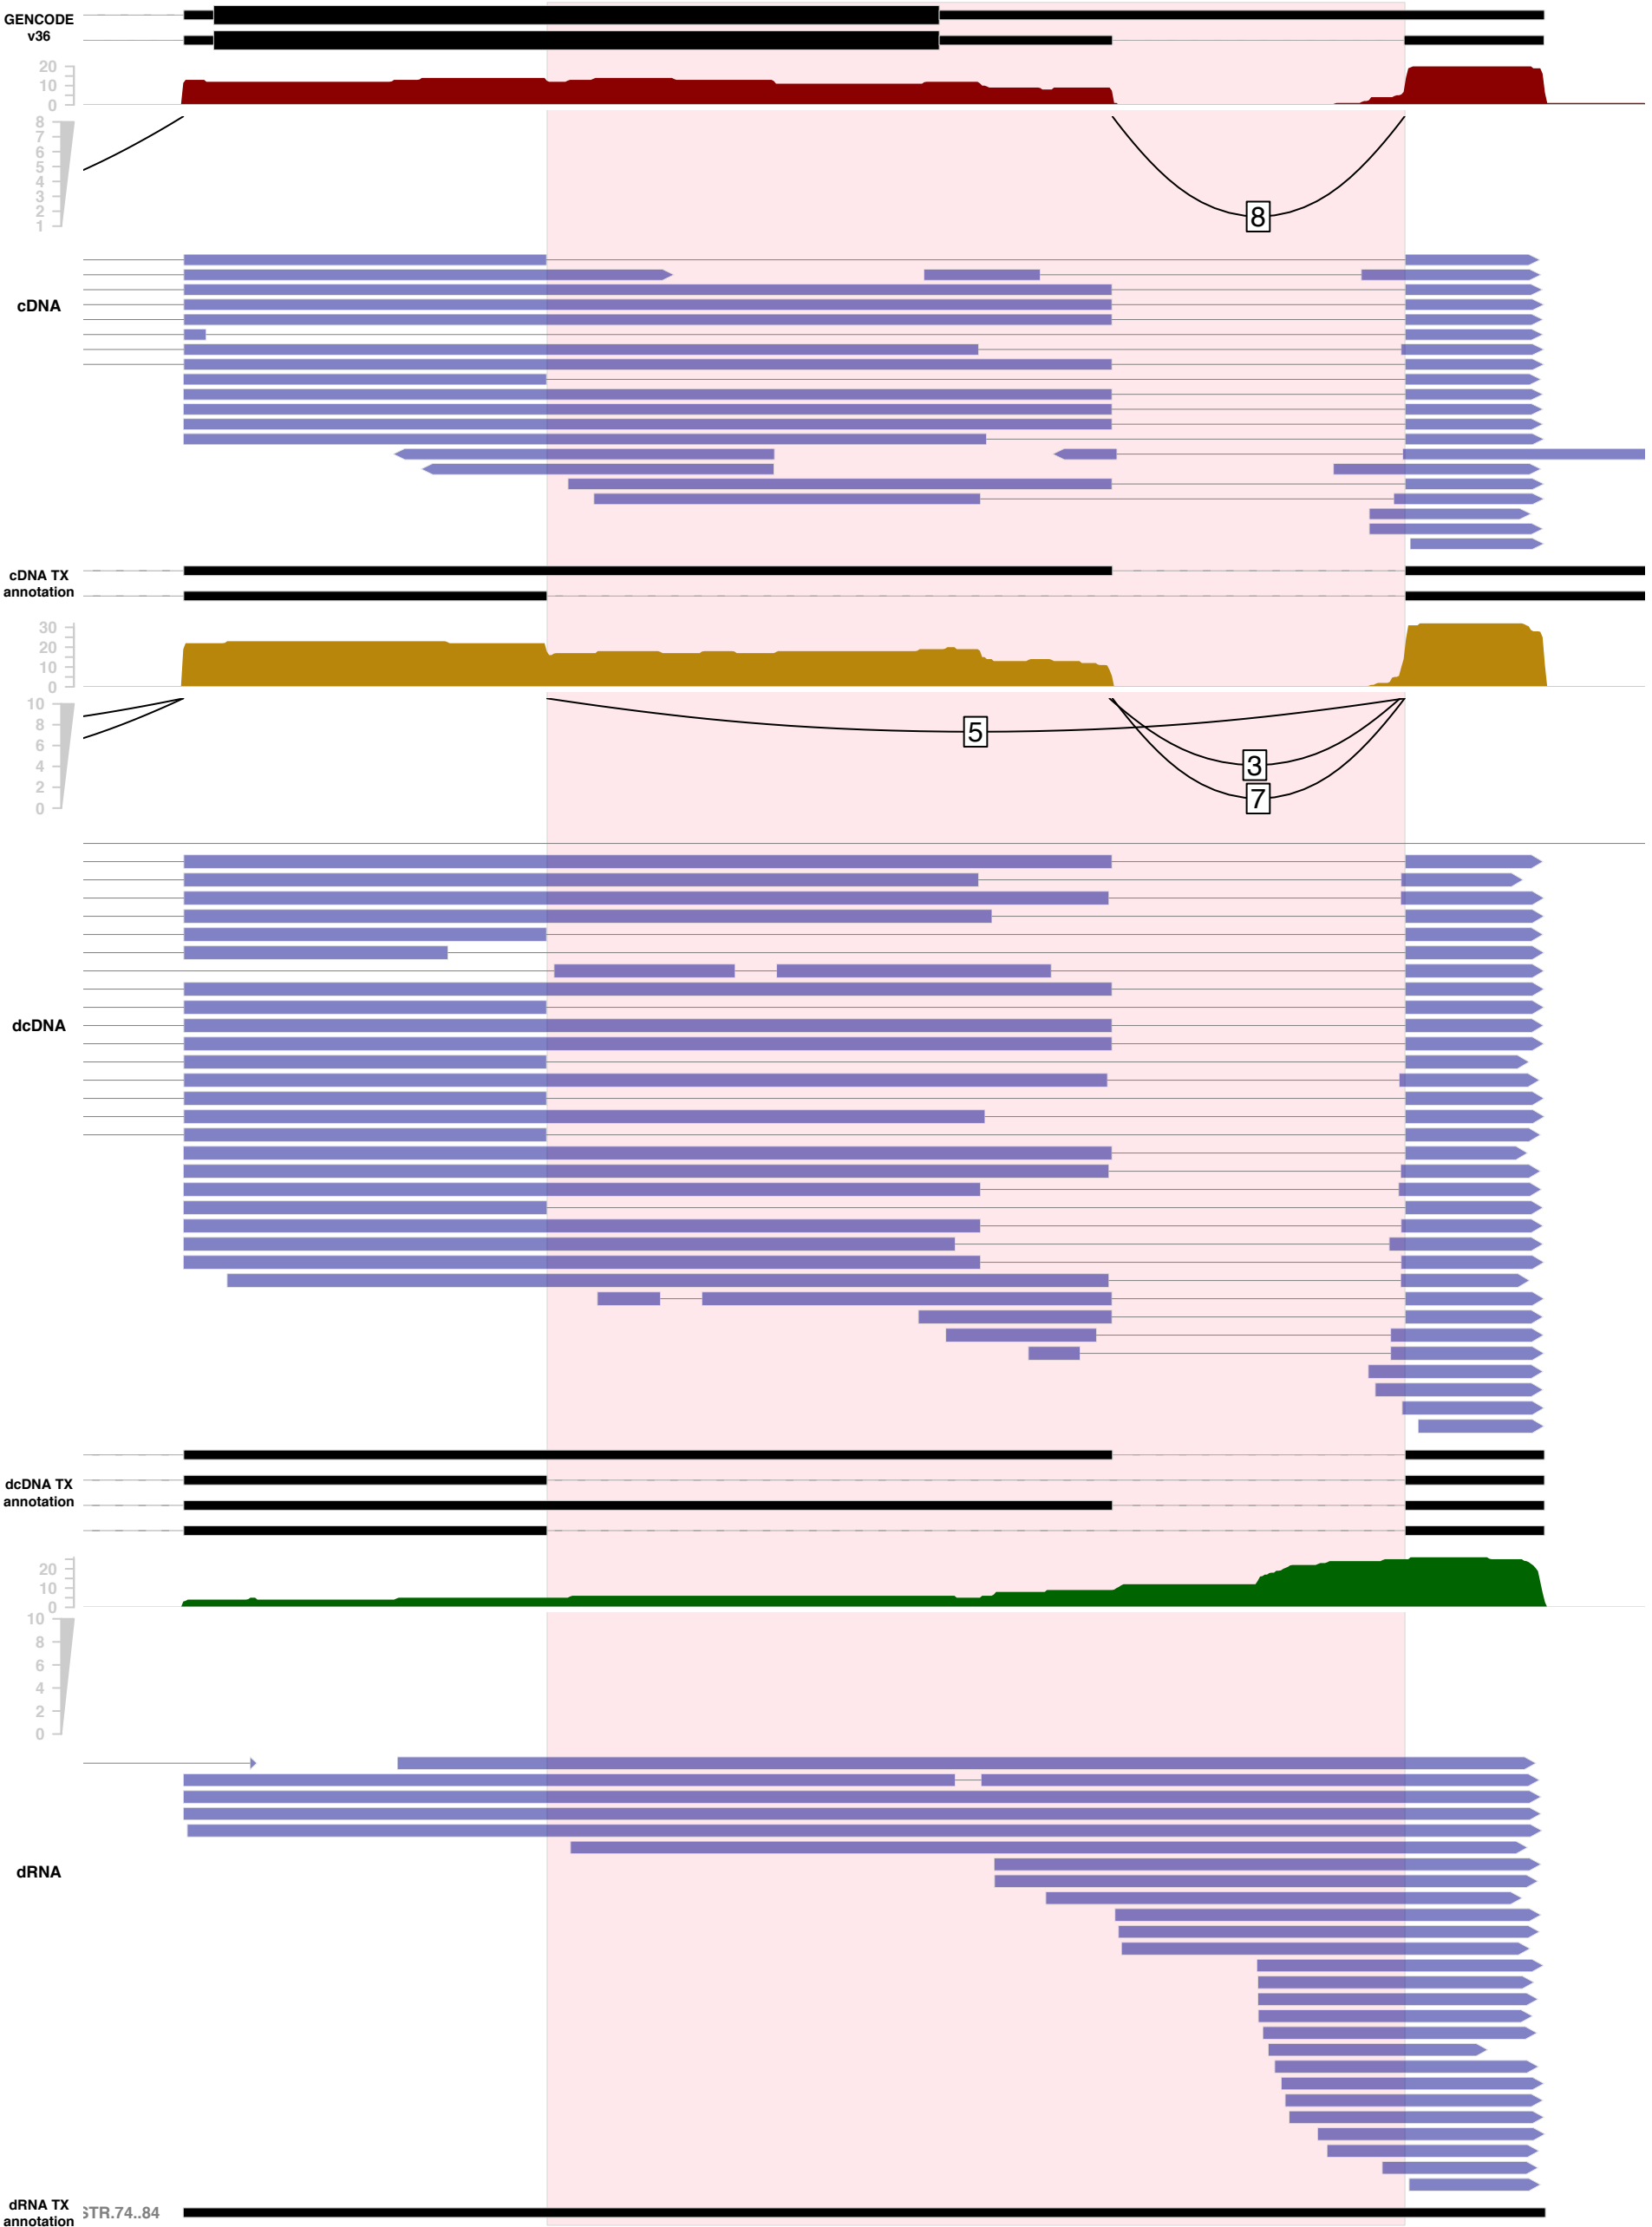

chr1:8012958-8013358:- ERRFI1  
Cell line: HepG2  
Direct repeat sequence: GGGAAGC

GENCODE 0116285.13 v36  
ENSG00000116285.13  
ENSG00000116285.13  
ENSG00000116285.13

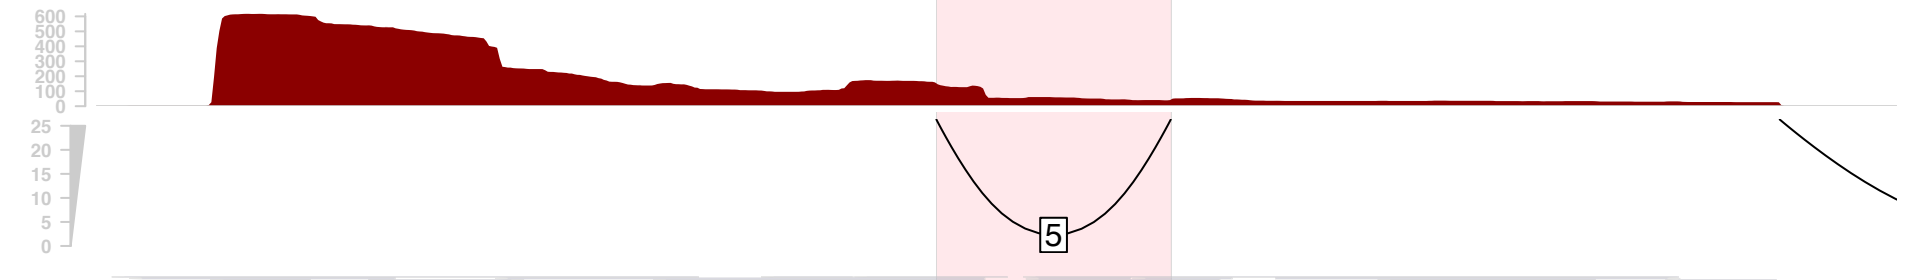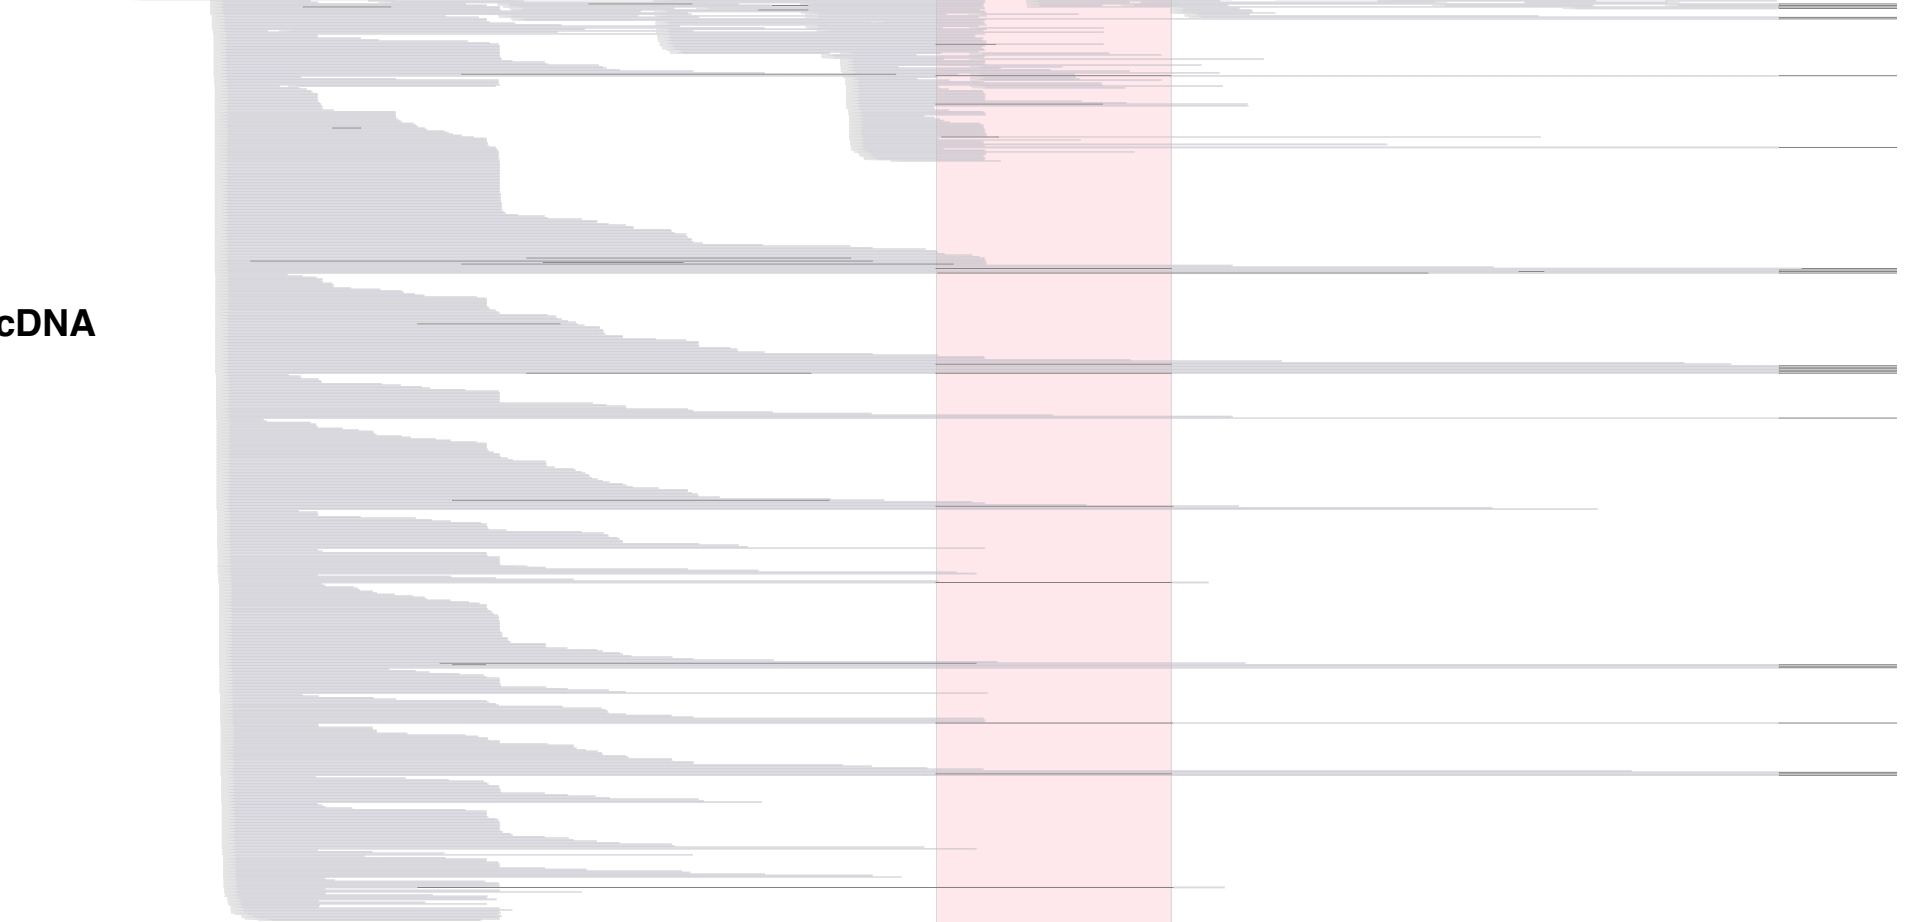

cDNA TX annotation STR:0:116 STR:0:116

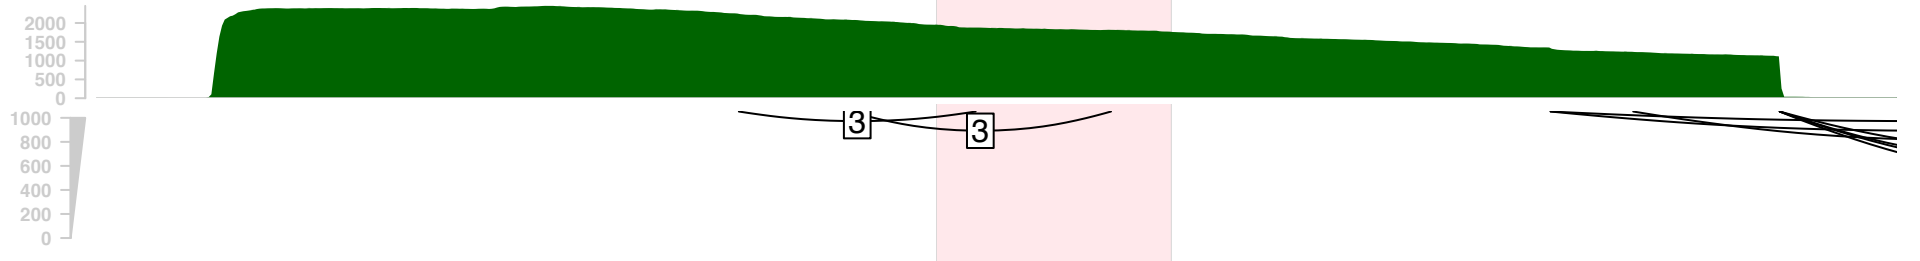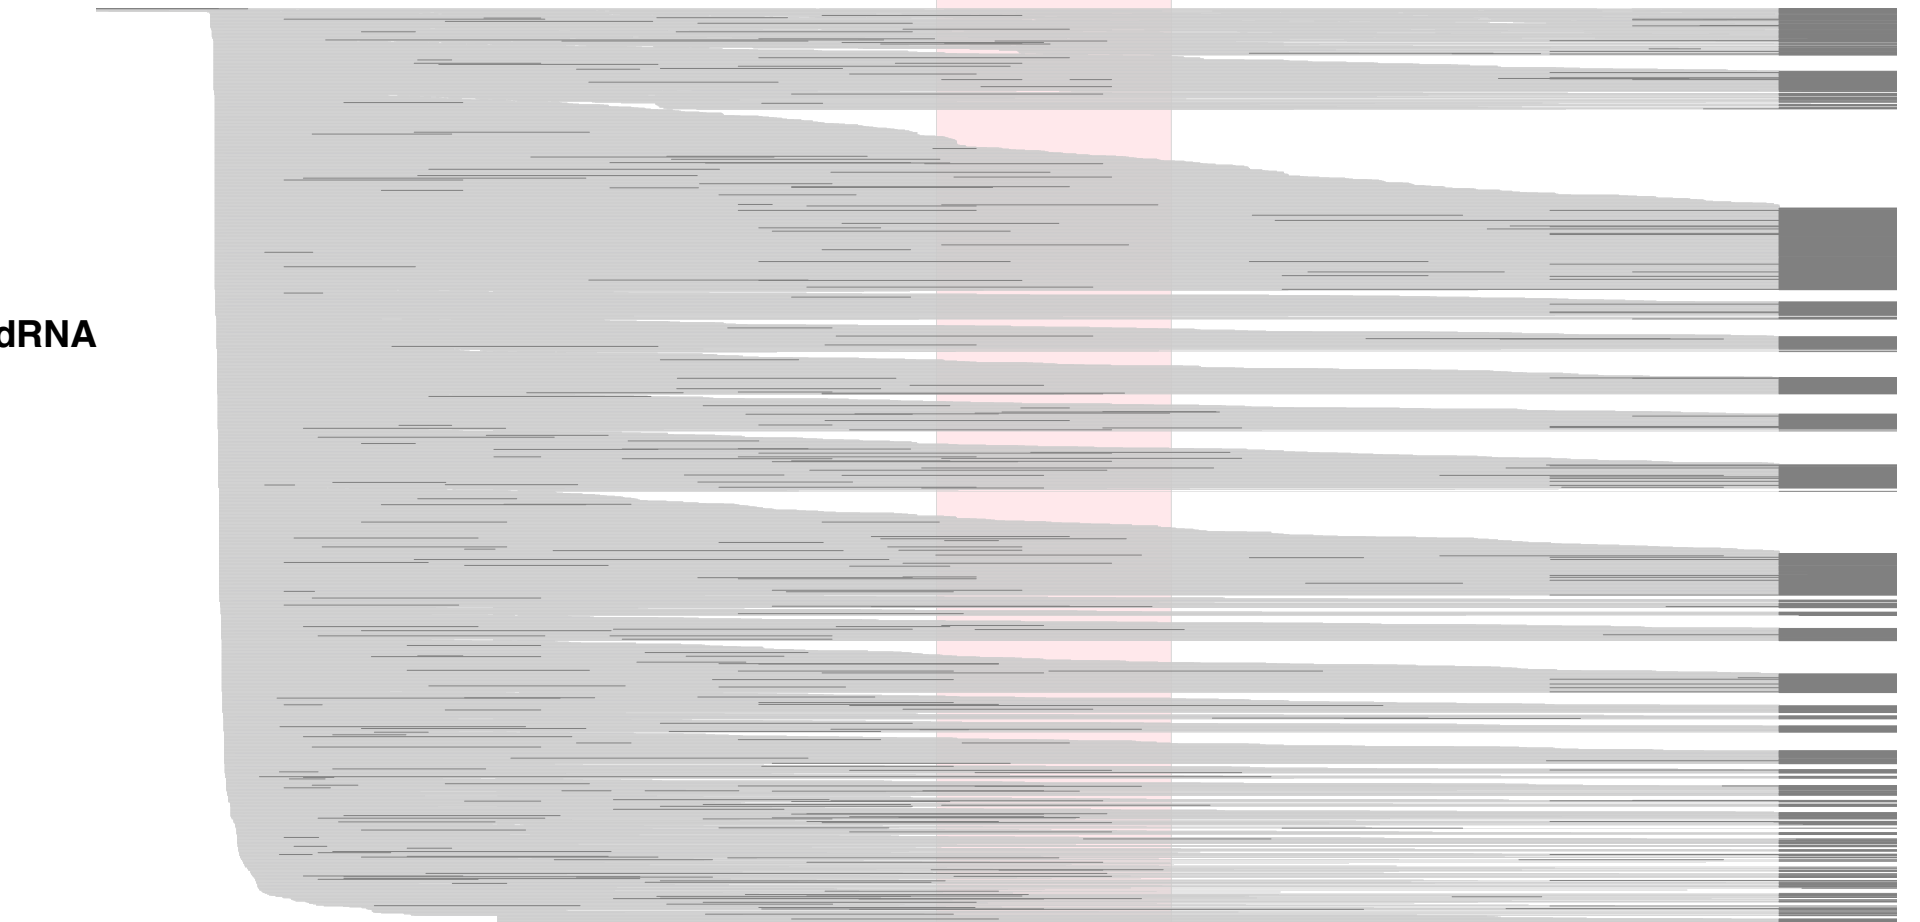

dRNA TX annotation STR:0:133 STR:0:133



chr5:163437659-163437758:+ CCNG1

Cell line: HepG2

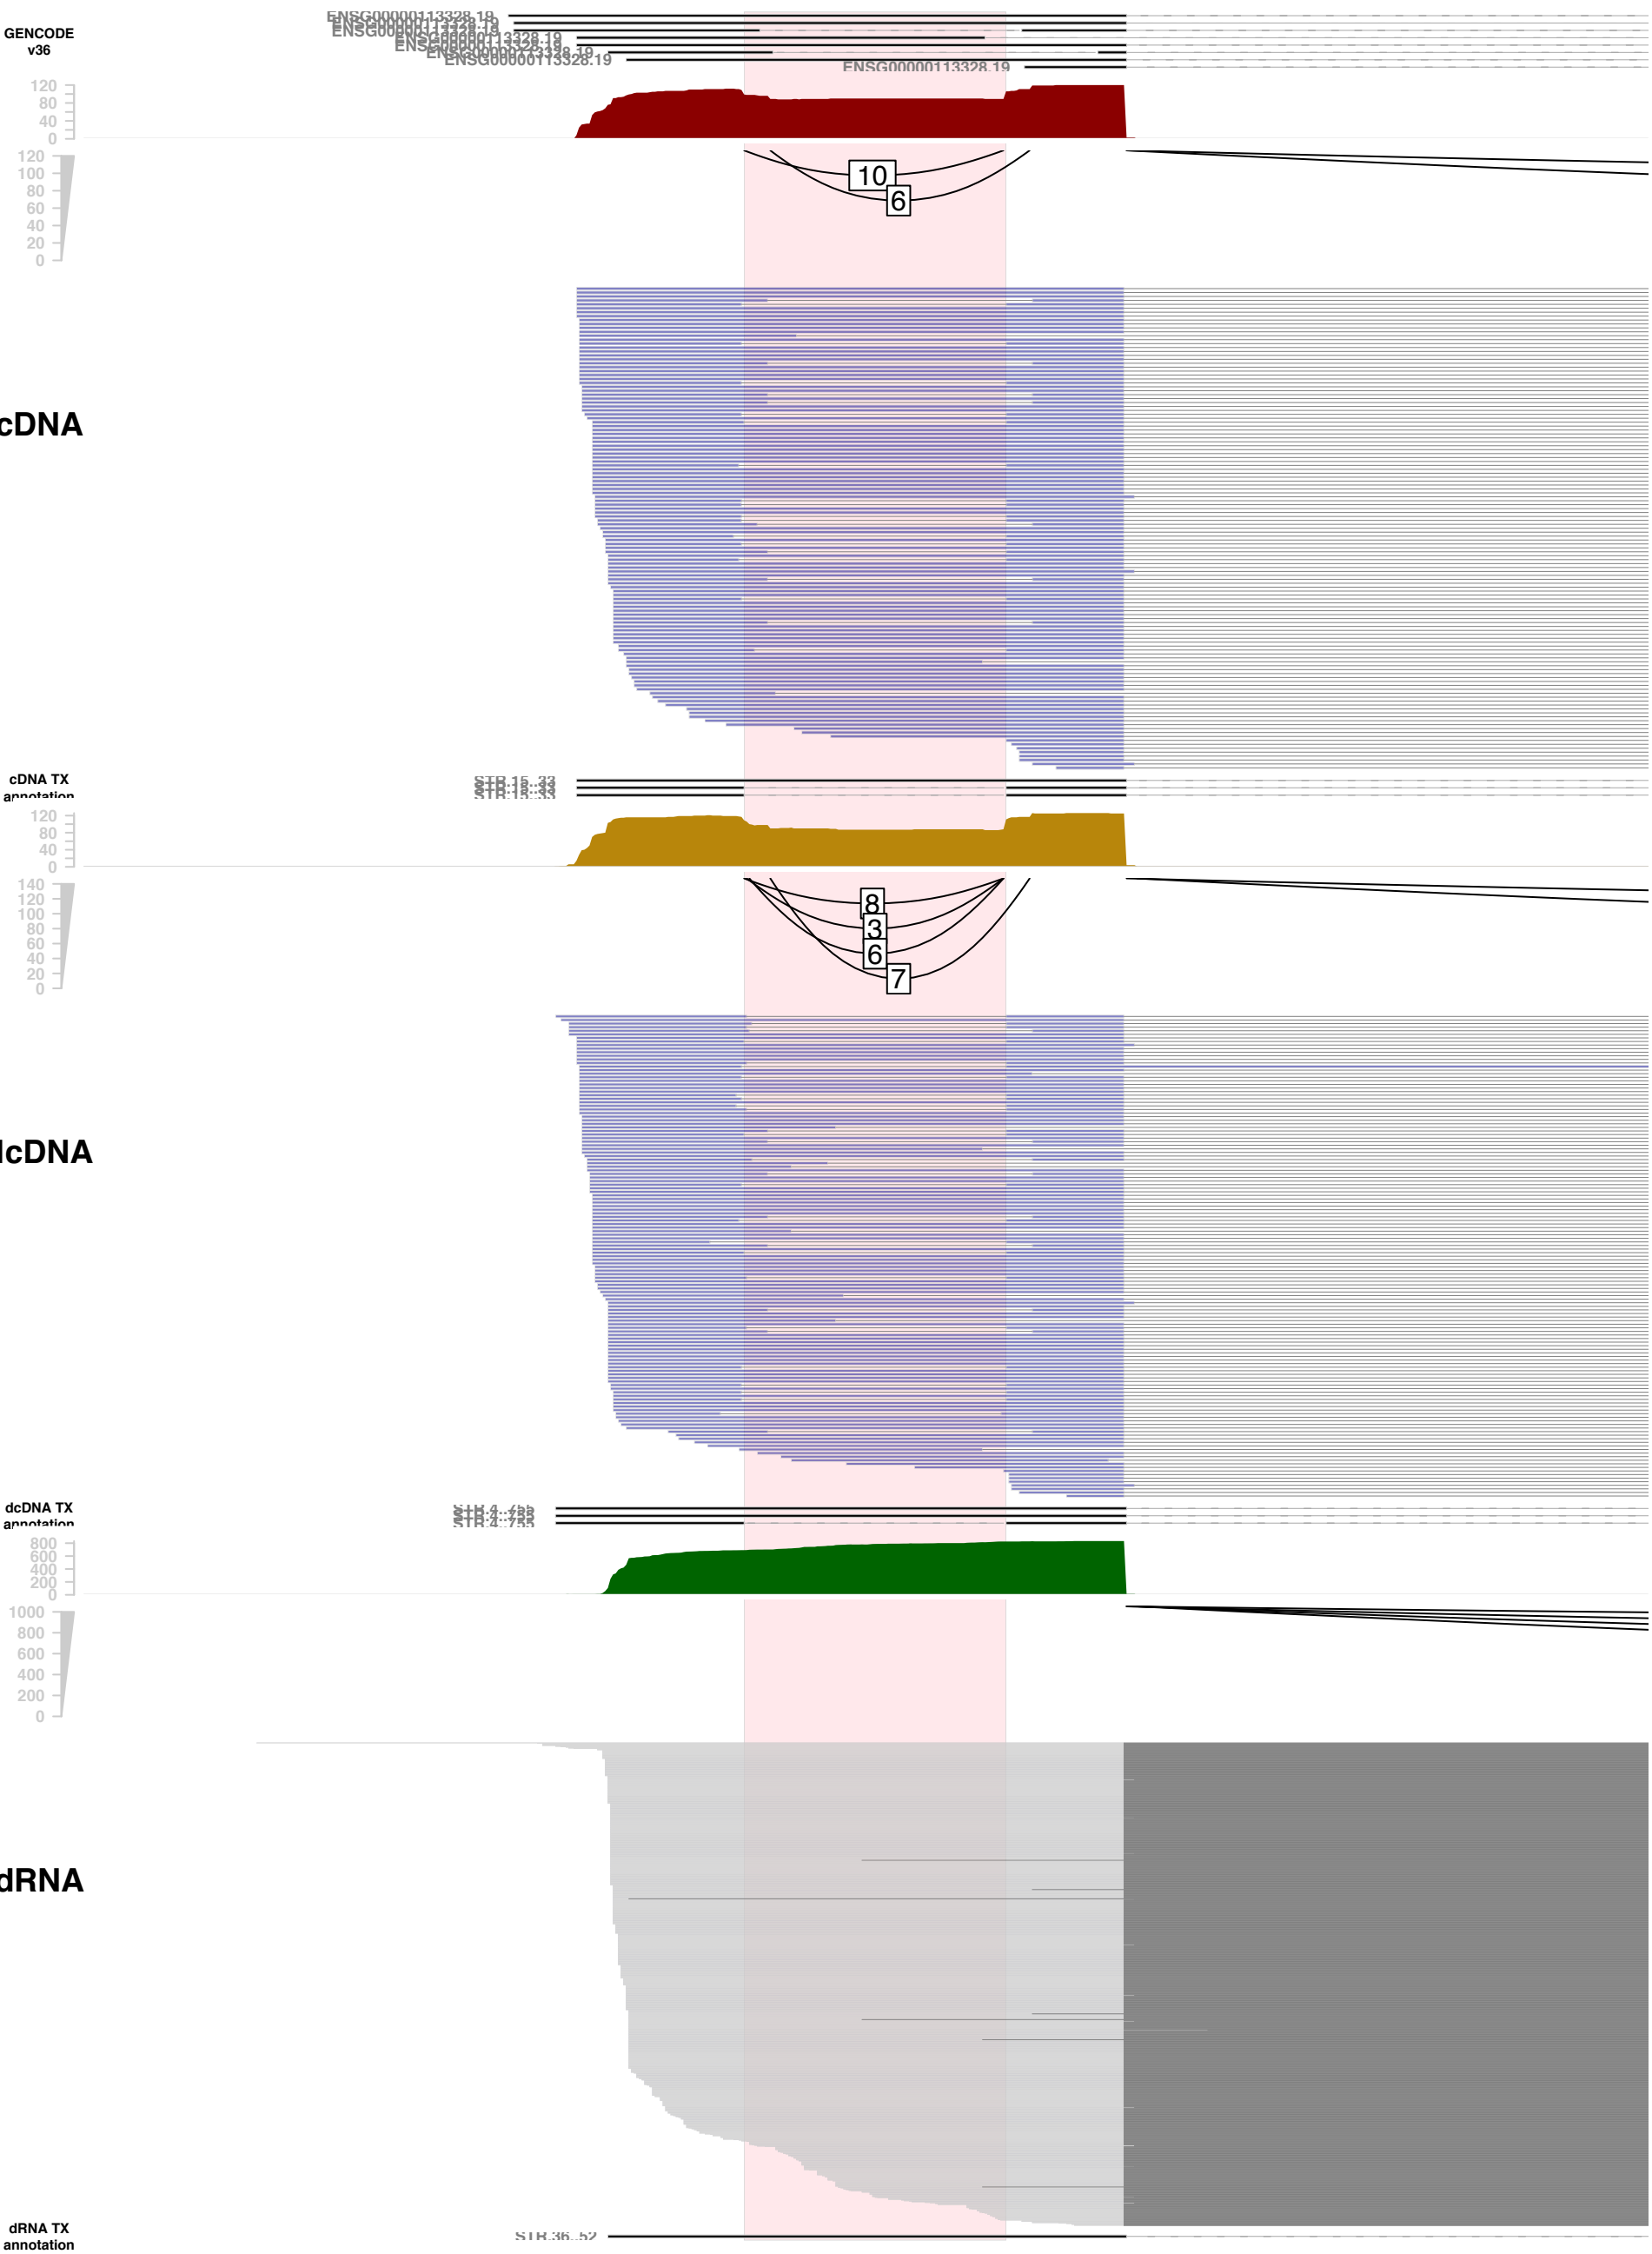

chr12:75501816-75501921:+ GLIPR1

Cell line: HepG2

GENCODE v36

ENSG00000111615.14

ENSG00000111615.14

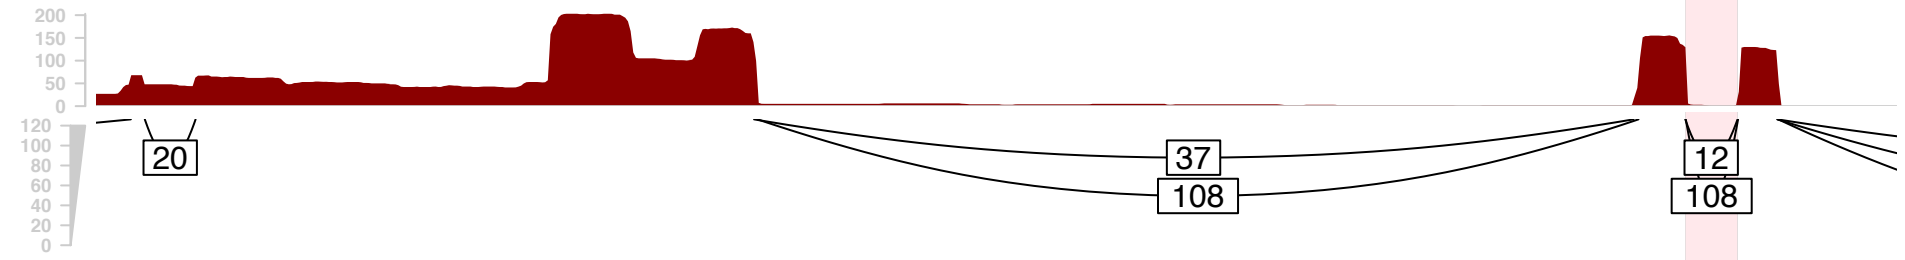

20

37

12

108

108

cDNA

cDNA TX annotation

STR.30..239

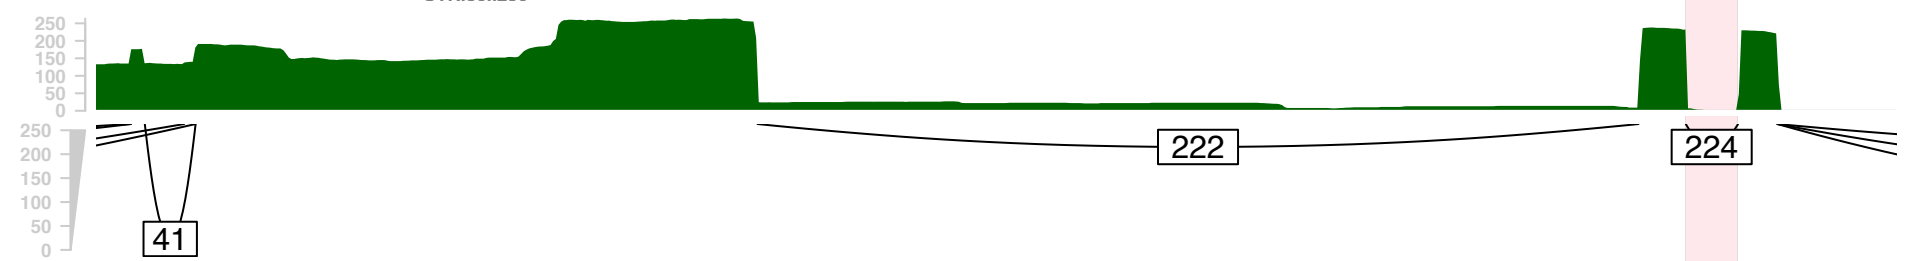

41

222

224

dRNA

dRNA TX annotation

chr14:31447249-31447389:- RP11-176H8.1,DTD2

Cell line: HepG2

Direct repeat sequence: CAGCAC

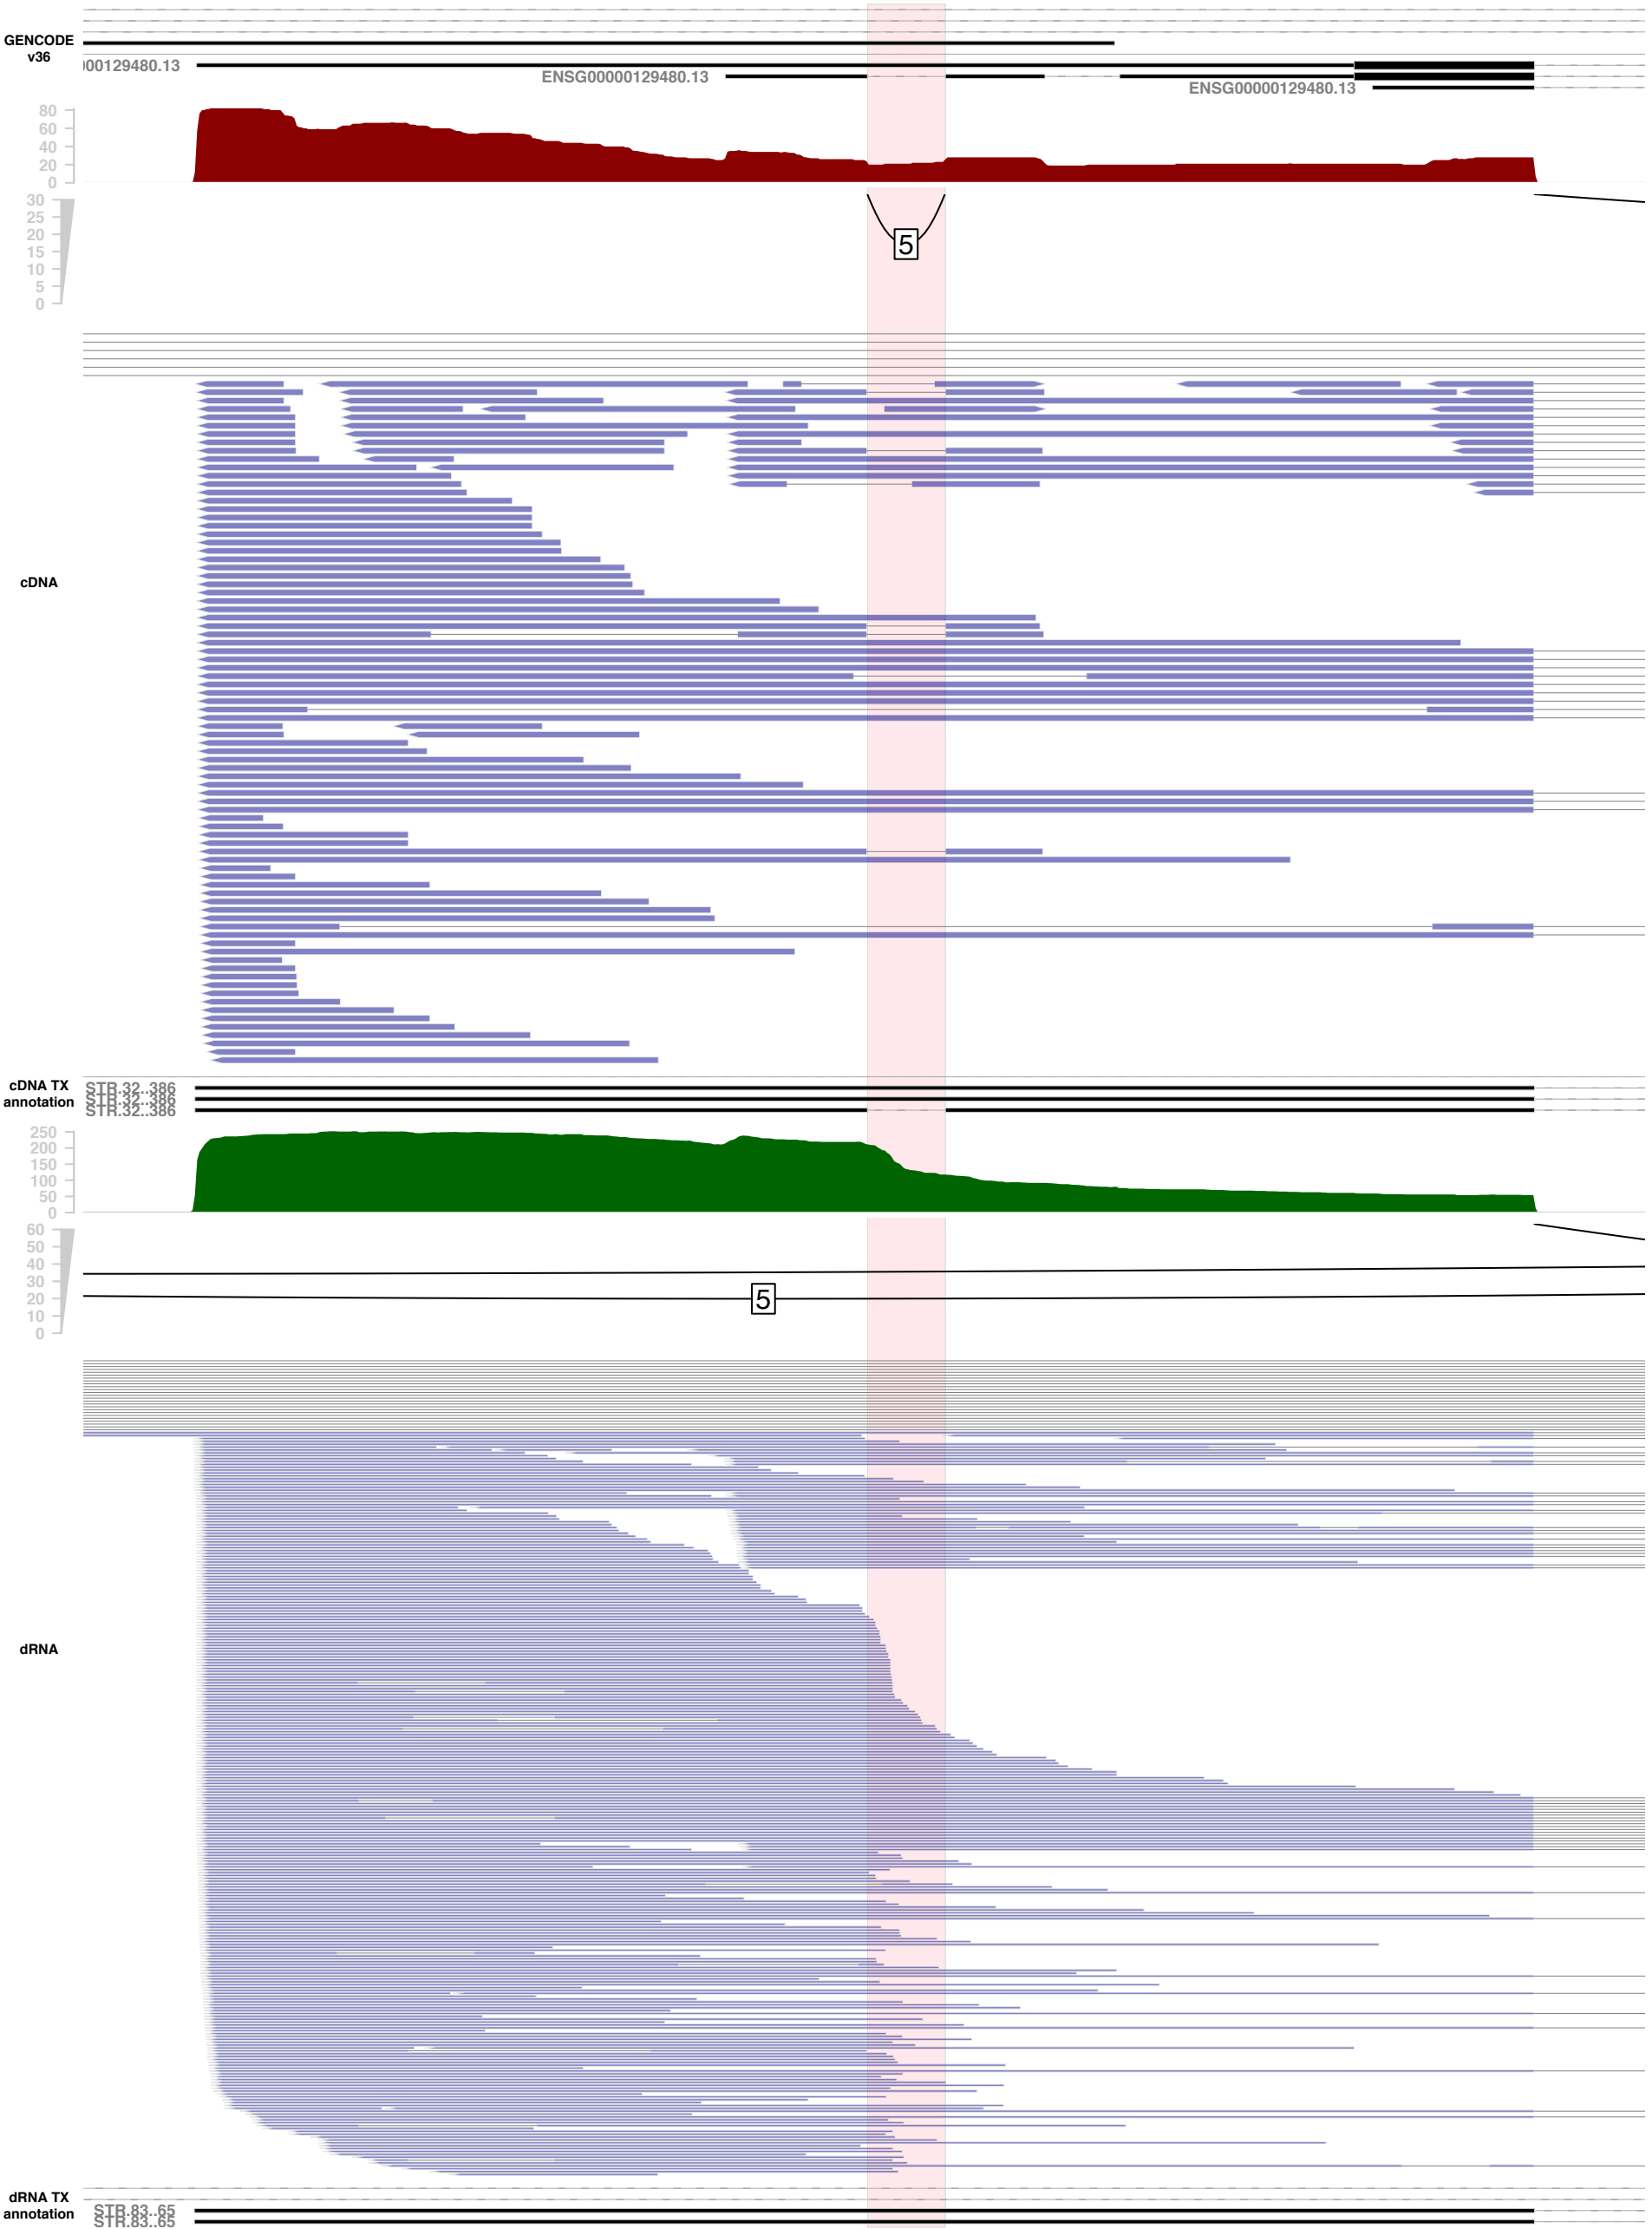



chr17:3663563-3663657:- TAX1BP3,P2RX5-TAX1BP3

Cell line: HepG2

Direct repeat sequence: GACCG

GENCODE v36  
ENSG00000213977.8  
ENSG00000213977.8  
ENSG00000257950.3

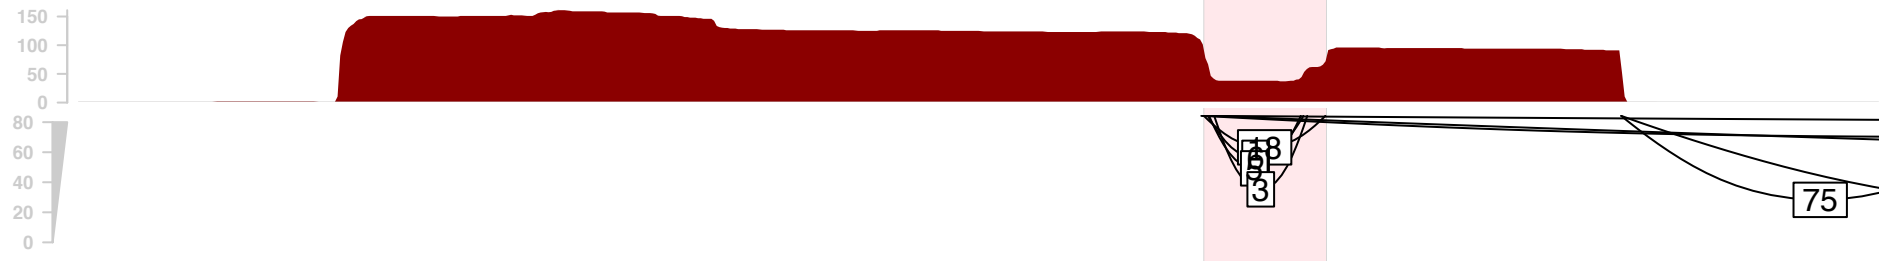

cDNA

cDNA TX  
annotation

STR 38..167  
STR 38..167  
STR 38..167  
STR 38..167

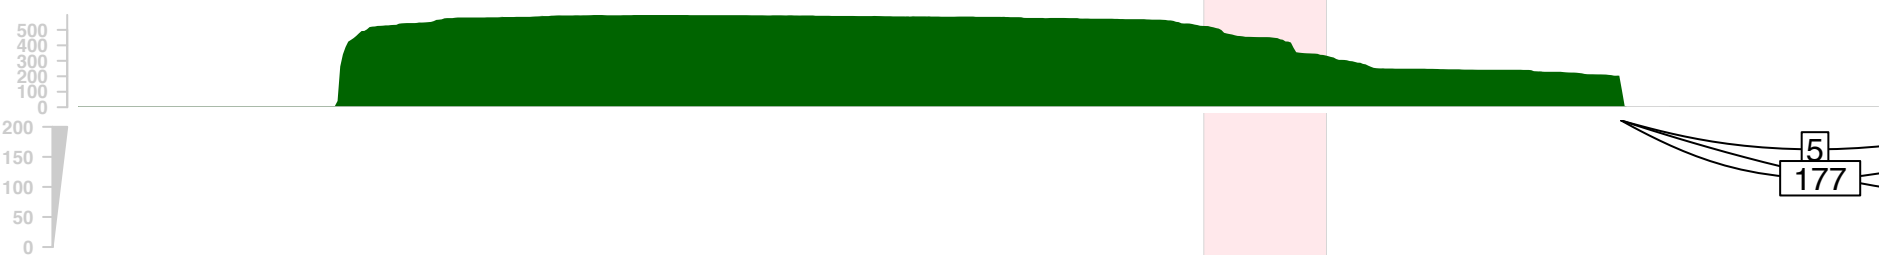

dRNA

dRNA TX  
annotation

STR 98..11  
STR 98..11  
STR 98..11

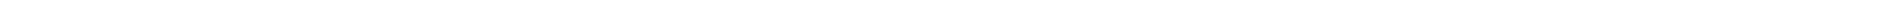

chr1:28334920-28335708:+ MED18

Cell line: HepG2

Direct repeat sequence: CAGCTA

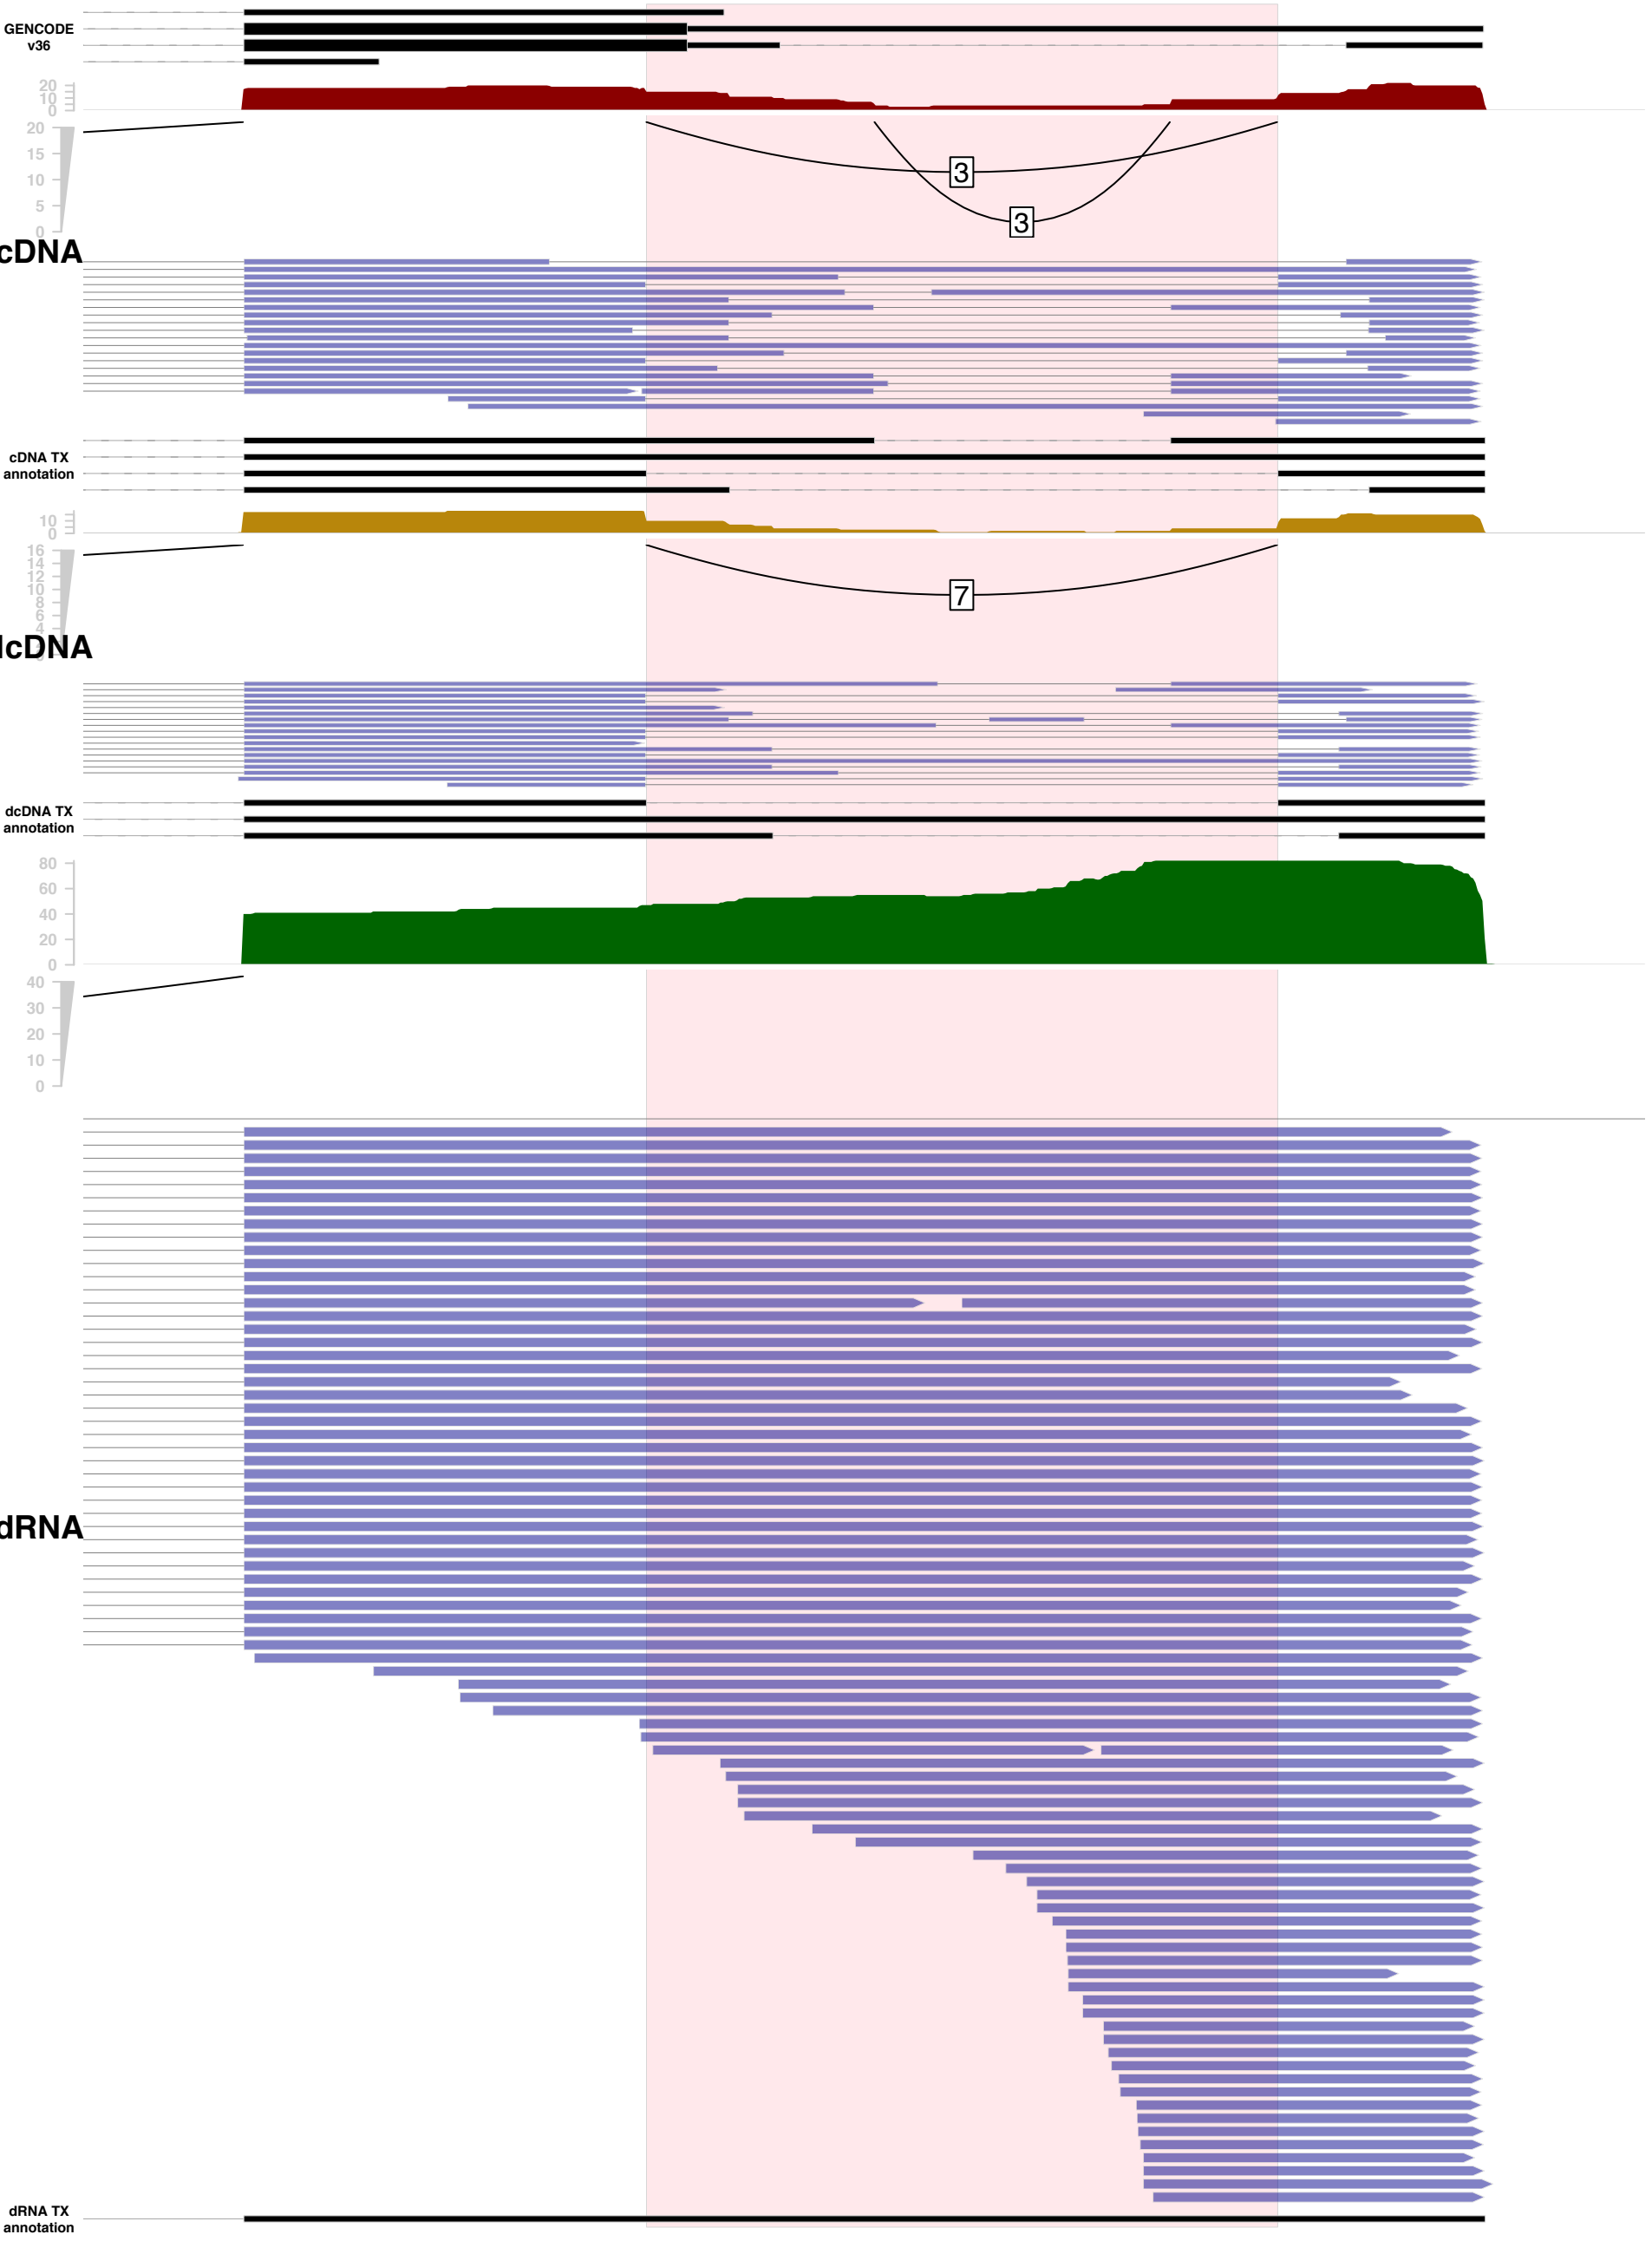

chr1:28334920-28335708:+ MED18

Cell line: K562

Direct repeat sequence: CAGCTA

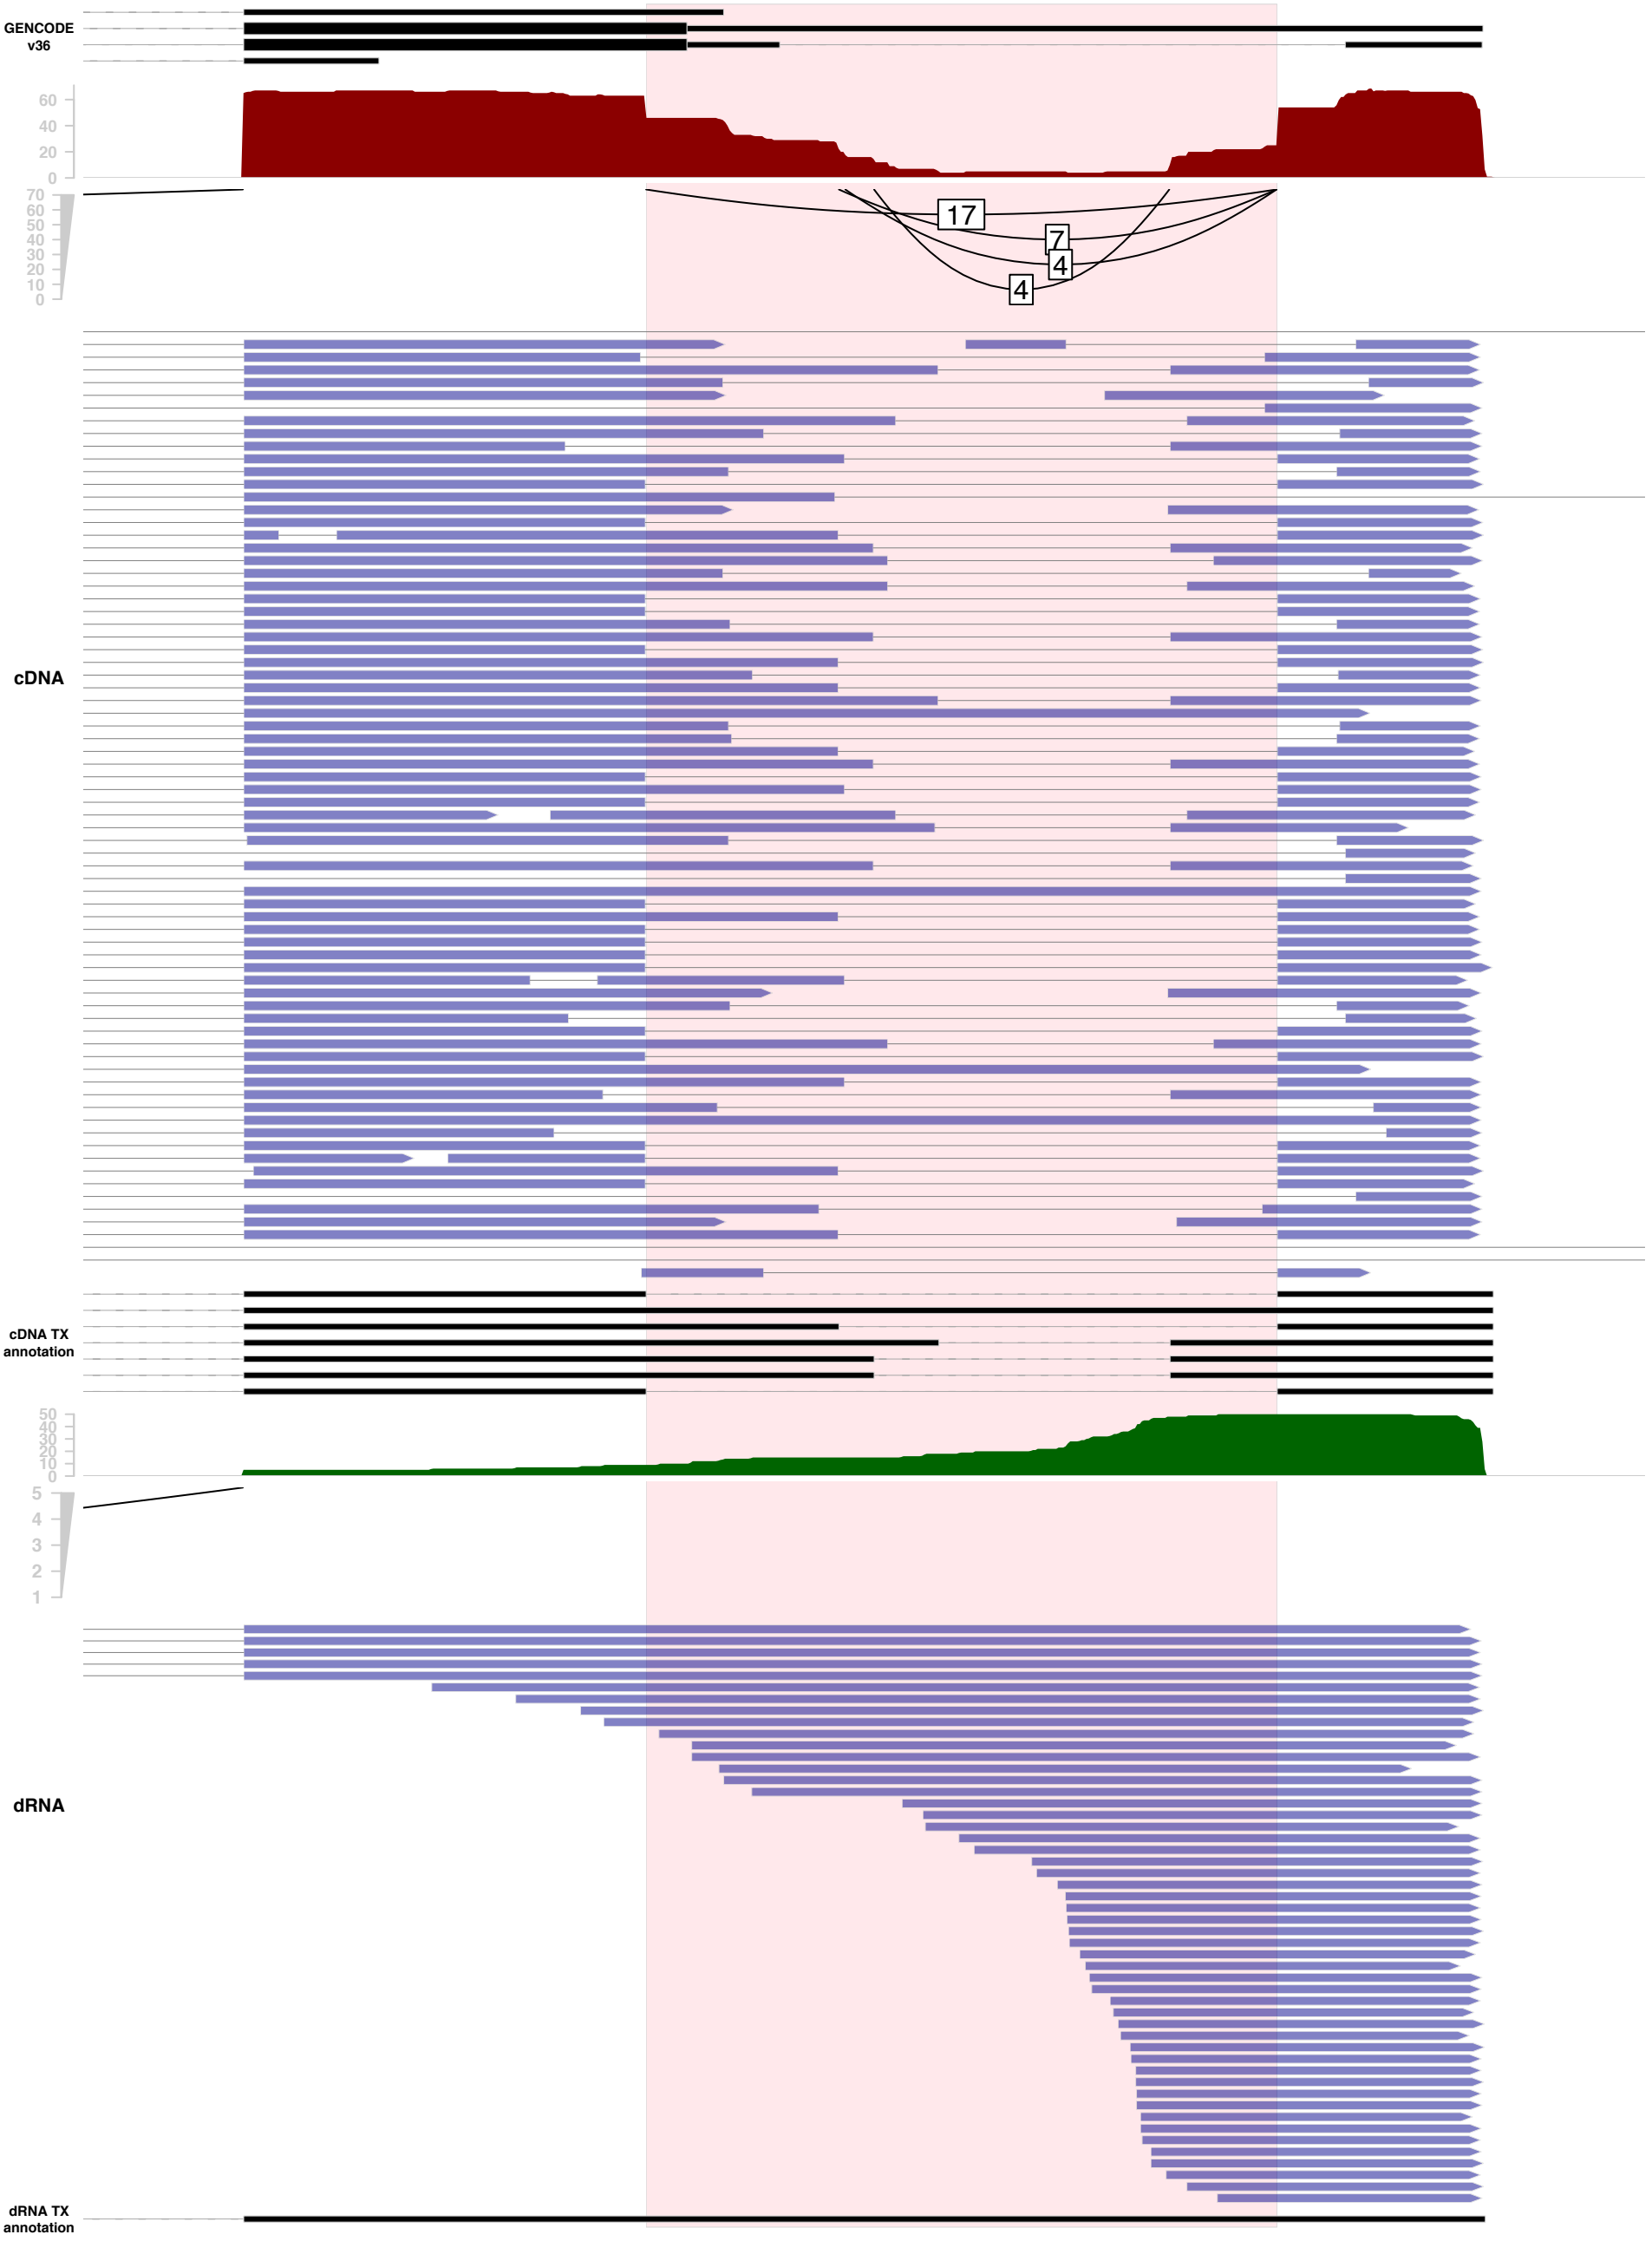

chr1:28335161-28335708:+ MED18

Cell line: K562

Direct repeat sequence: CAGC

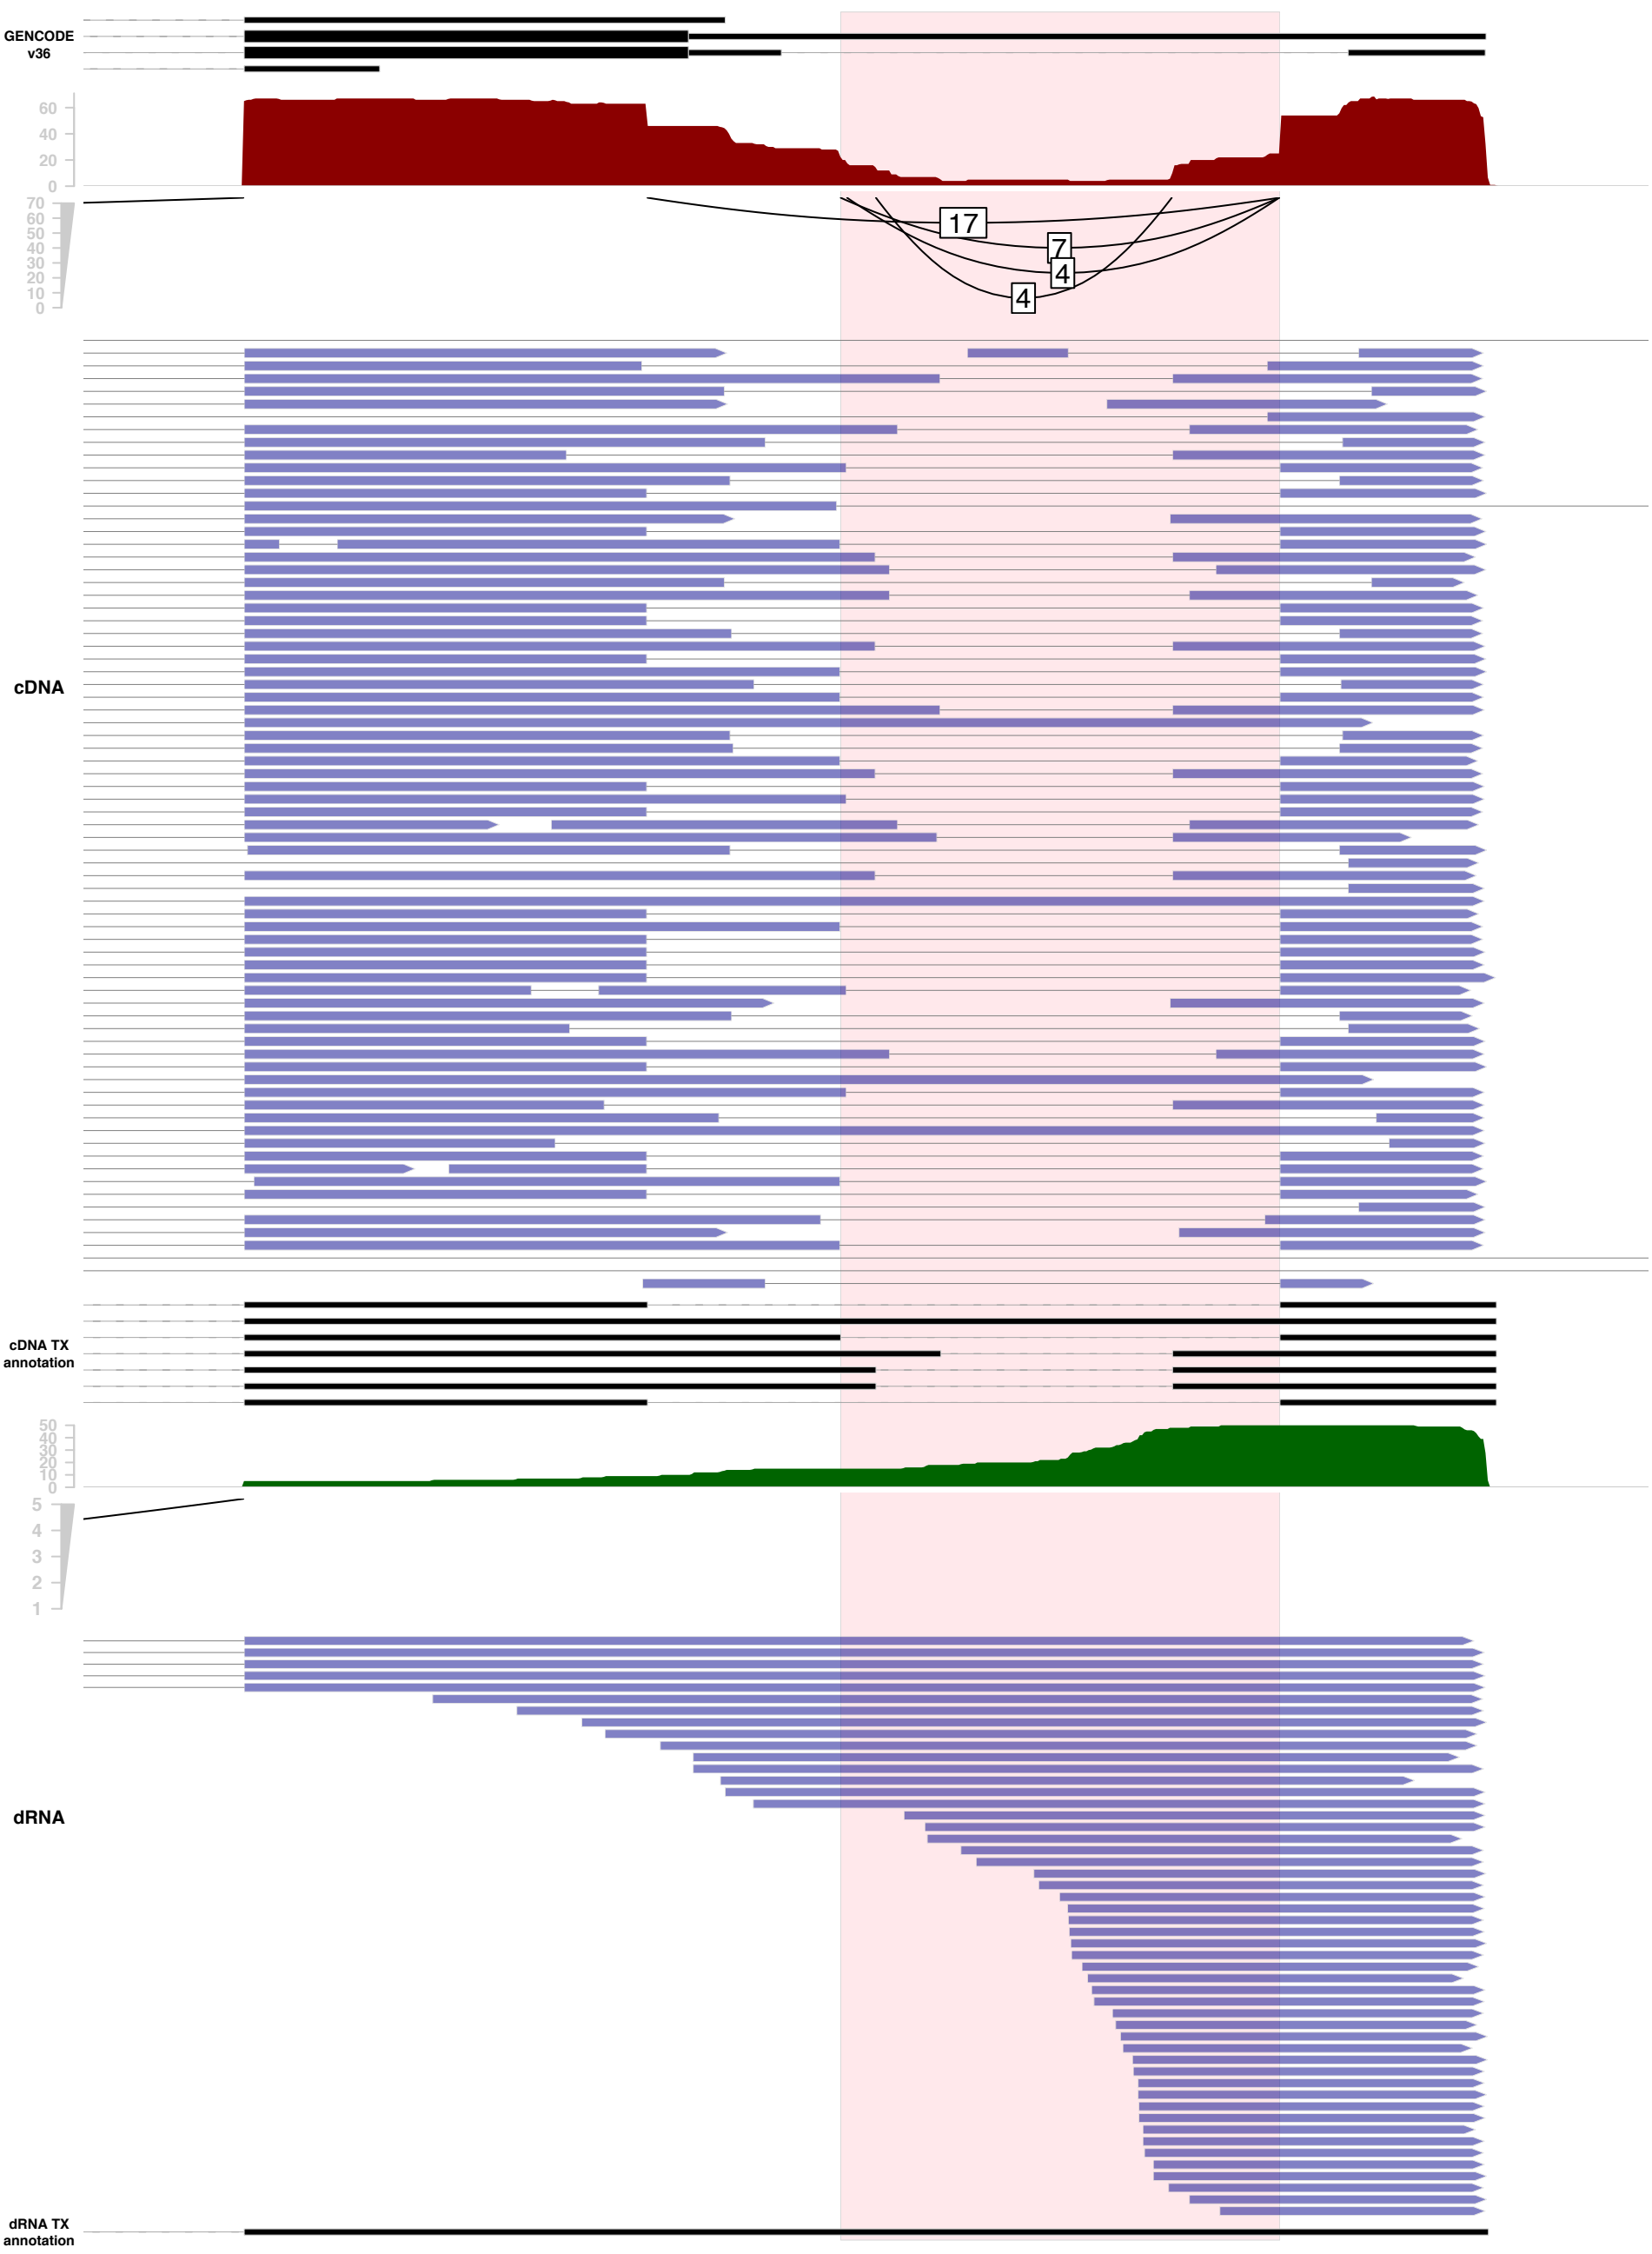

chr5:163437659-163437758:+ CCNG1

Cell line: K562

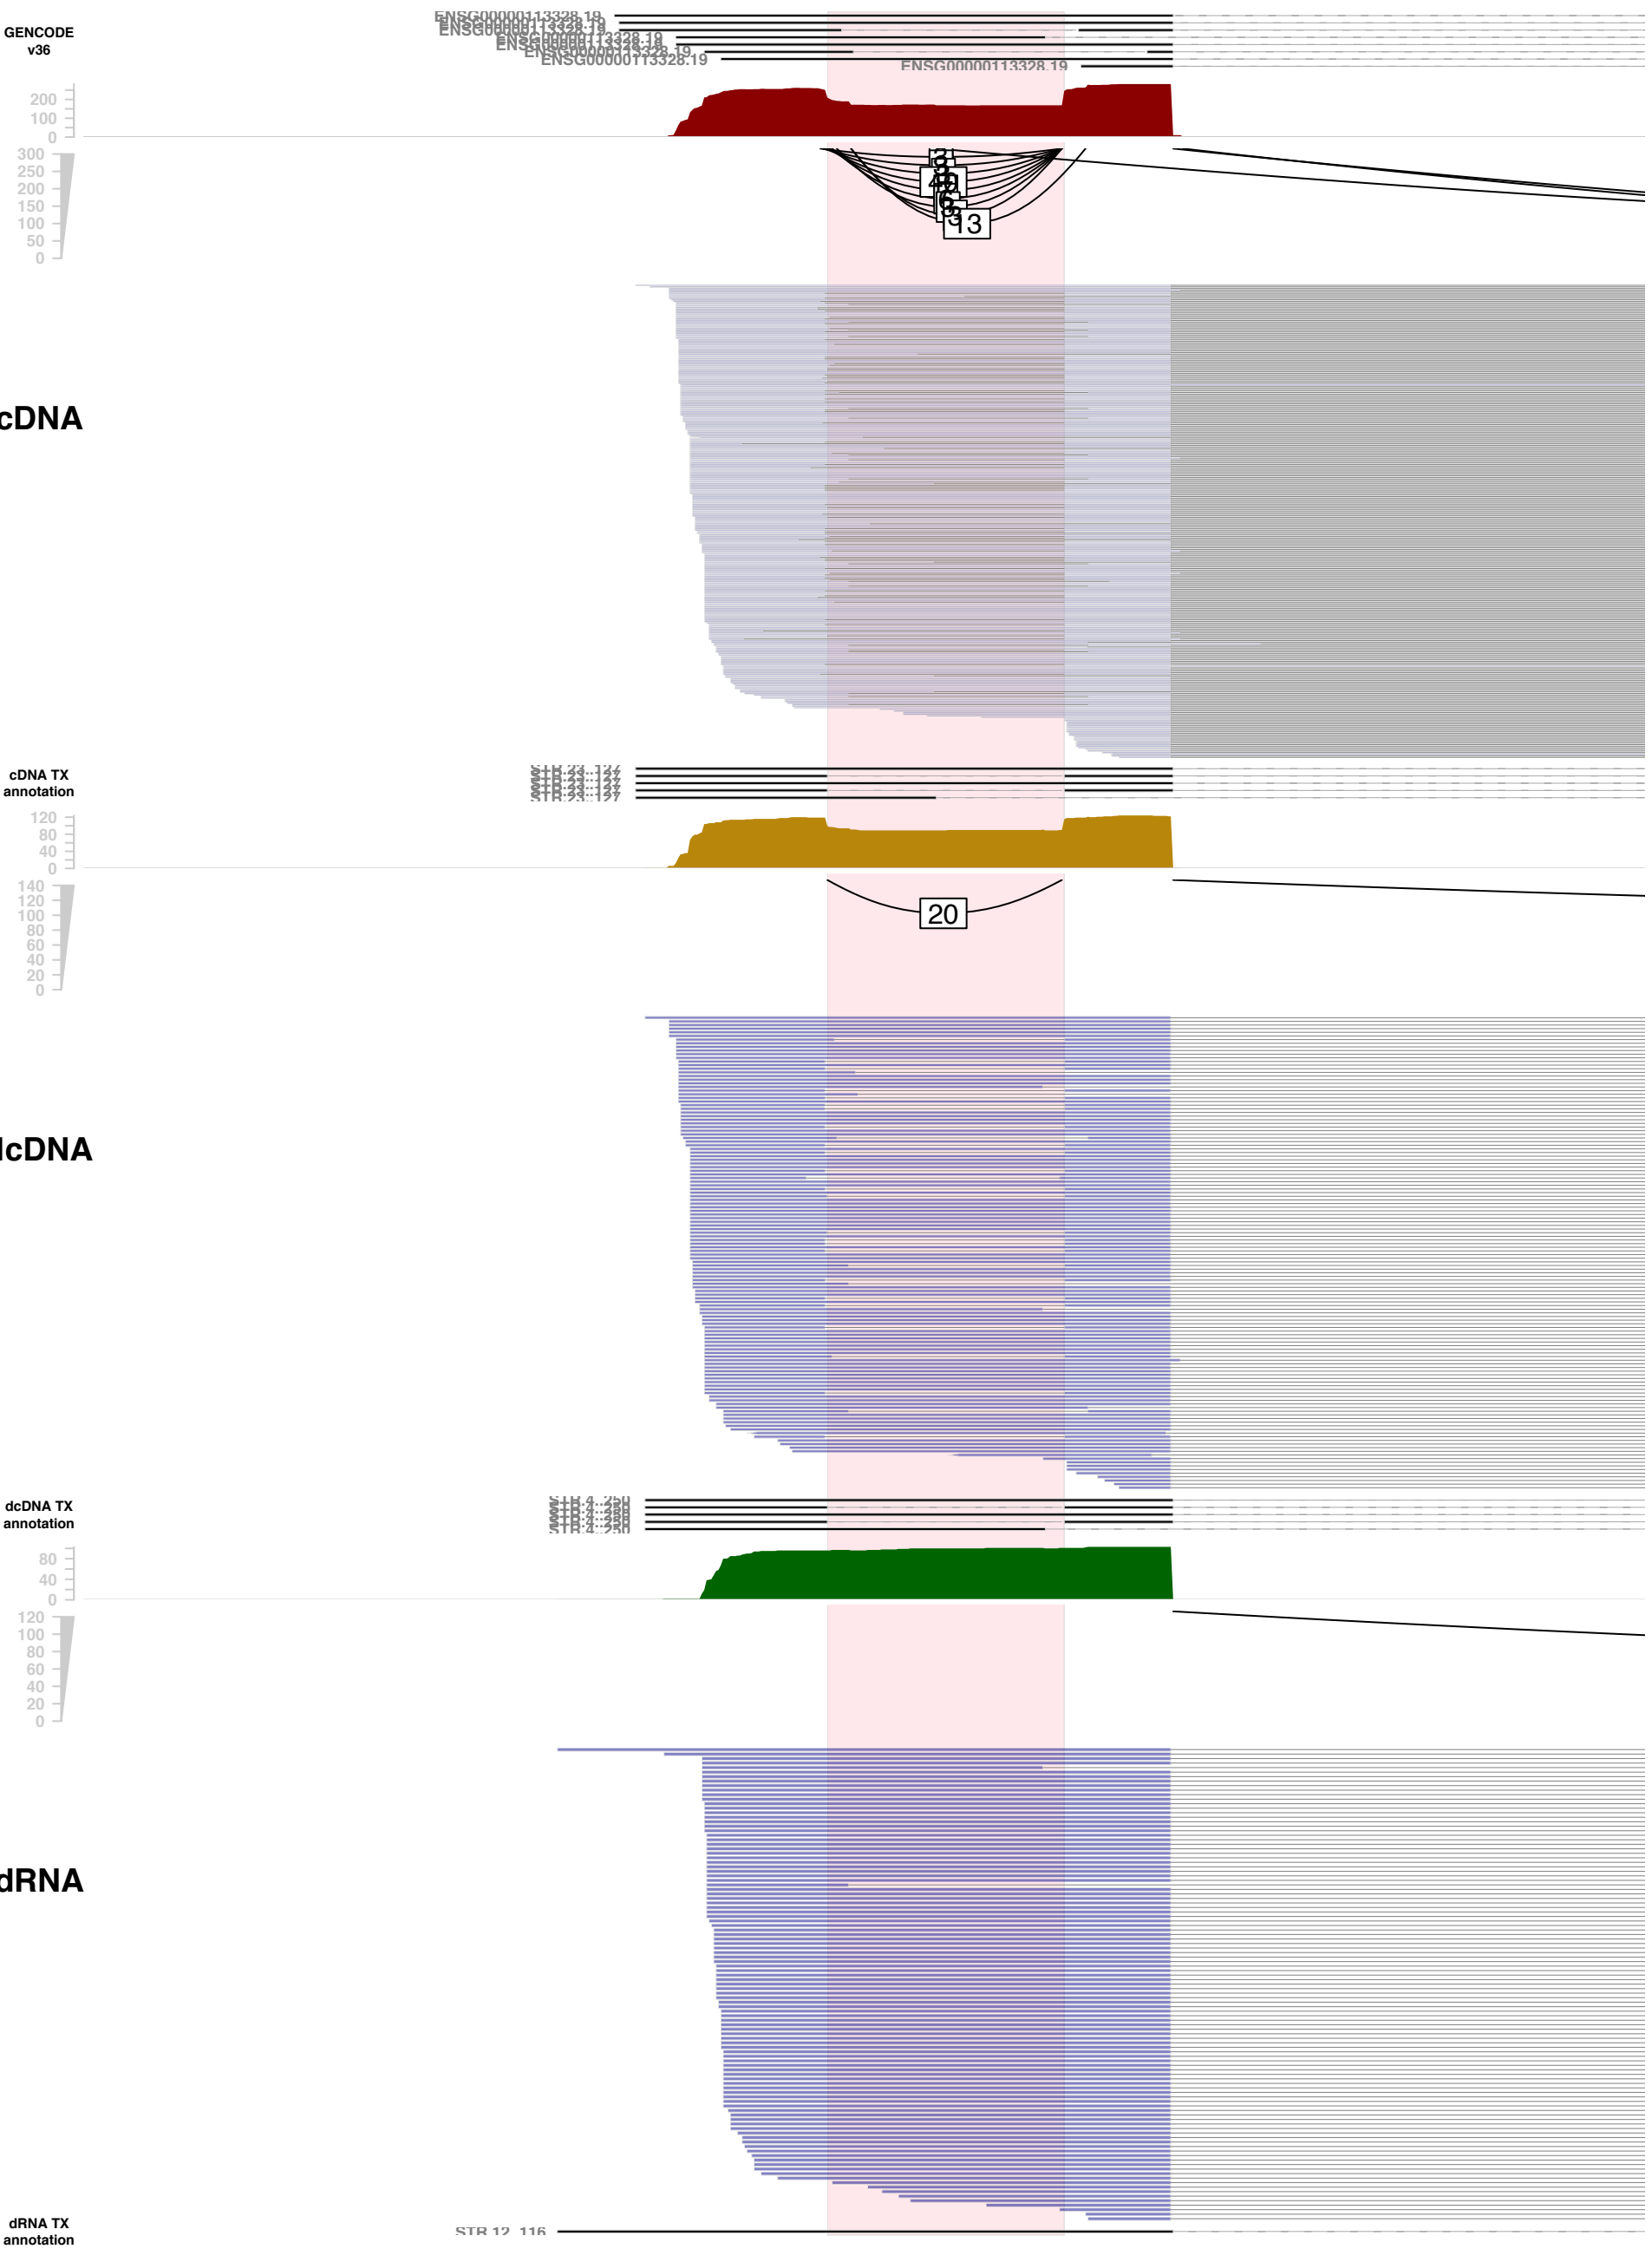

chr6:170584411-170584491:- PDCD2

Cell line: K562

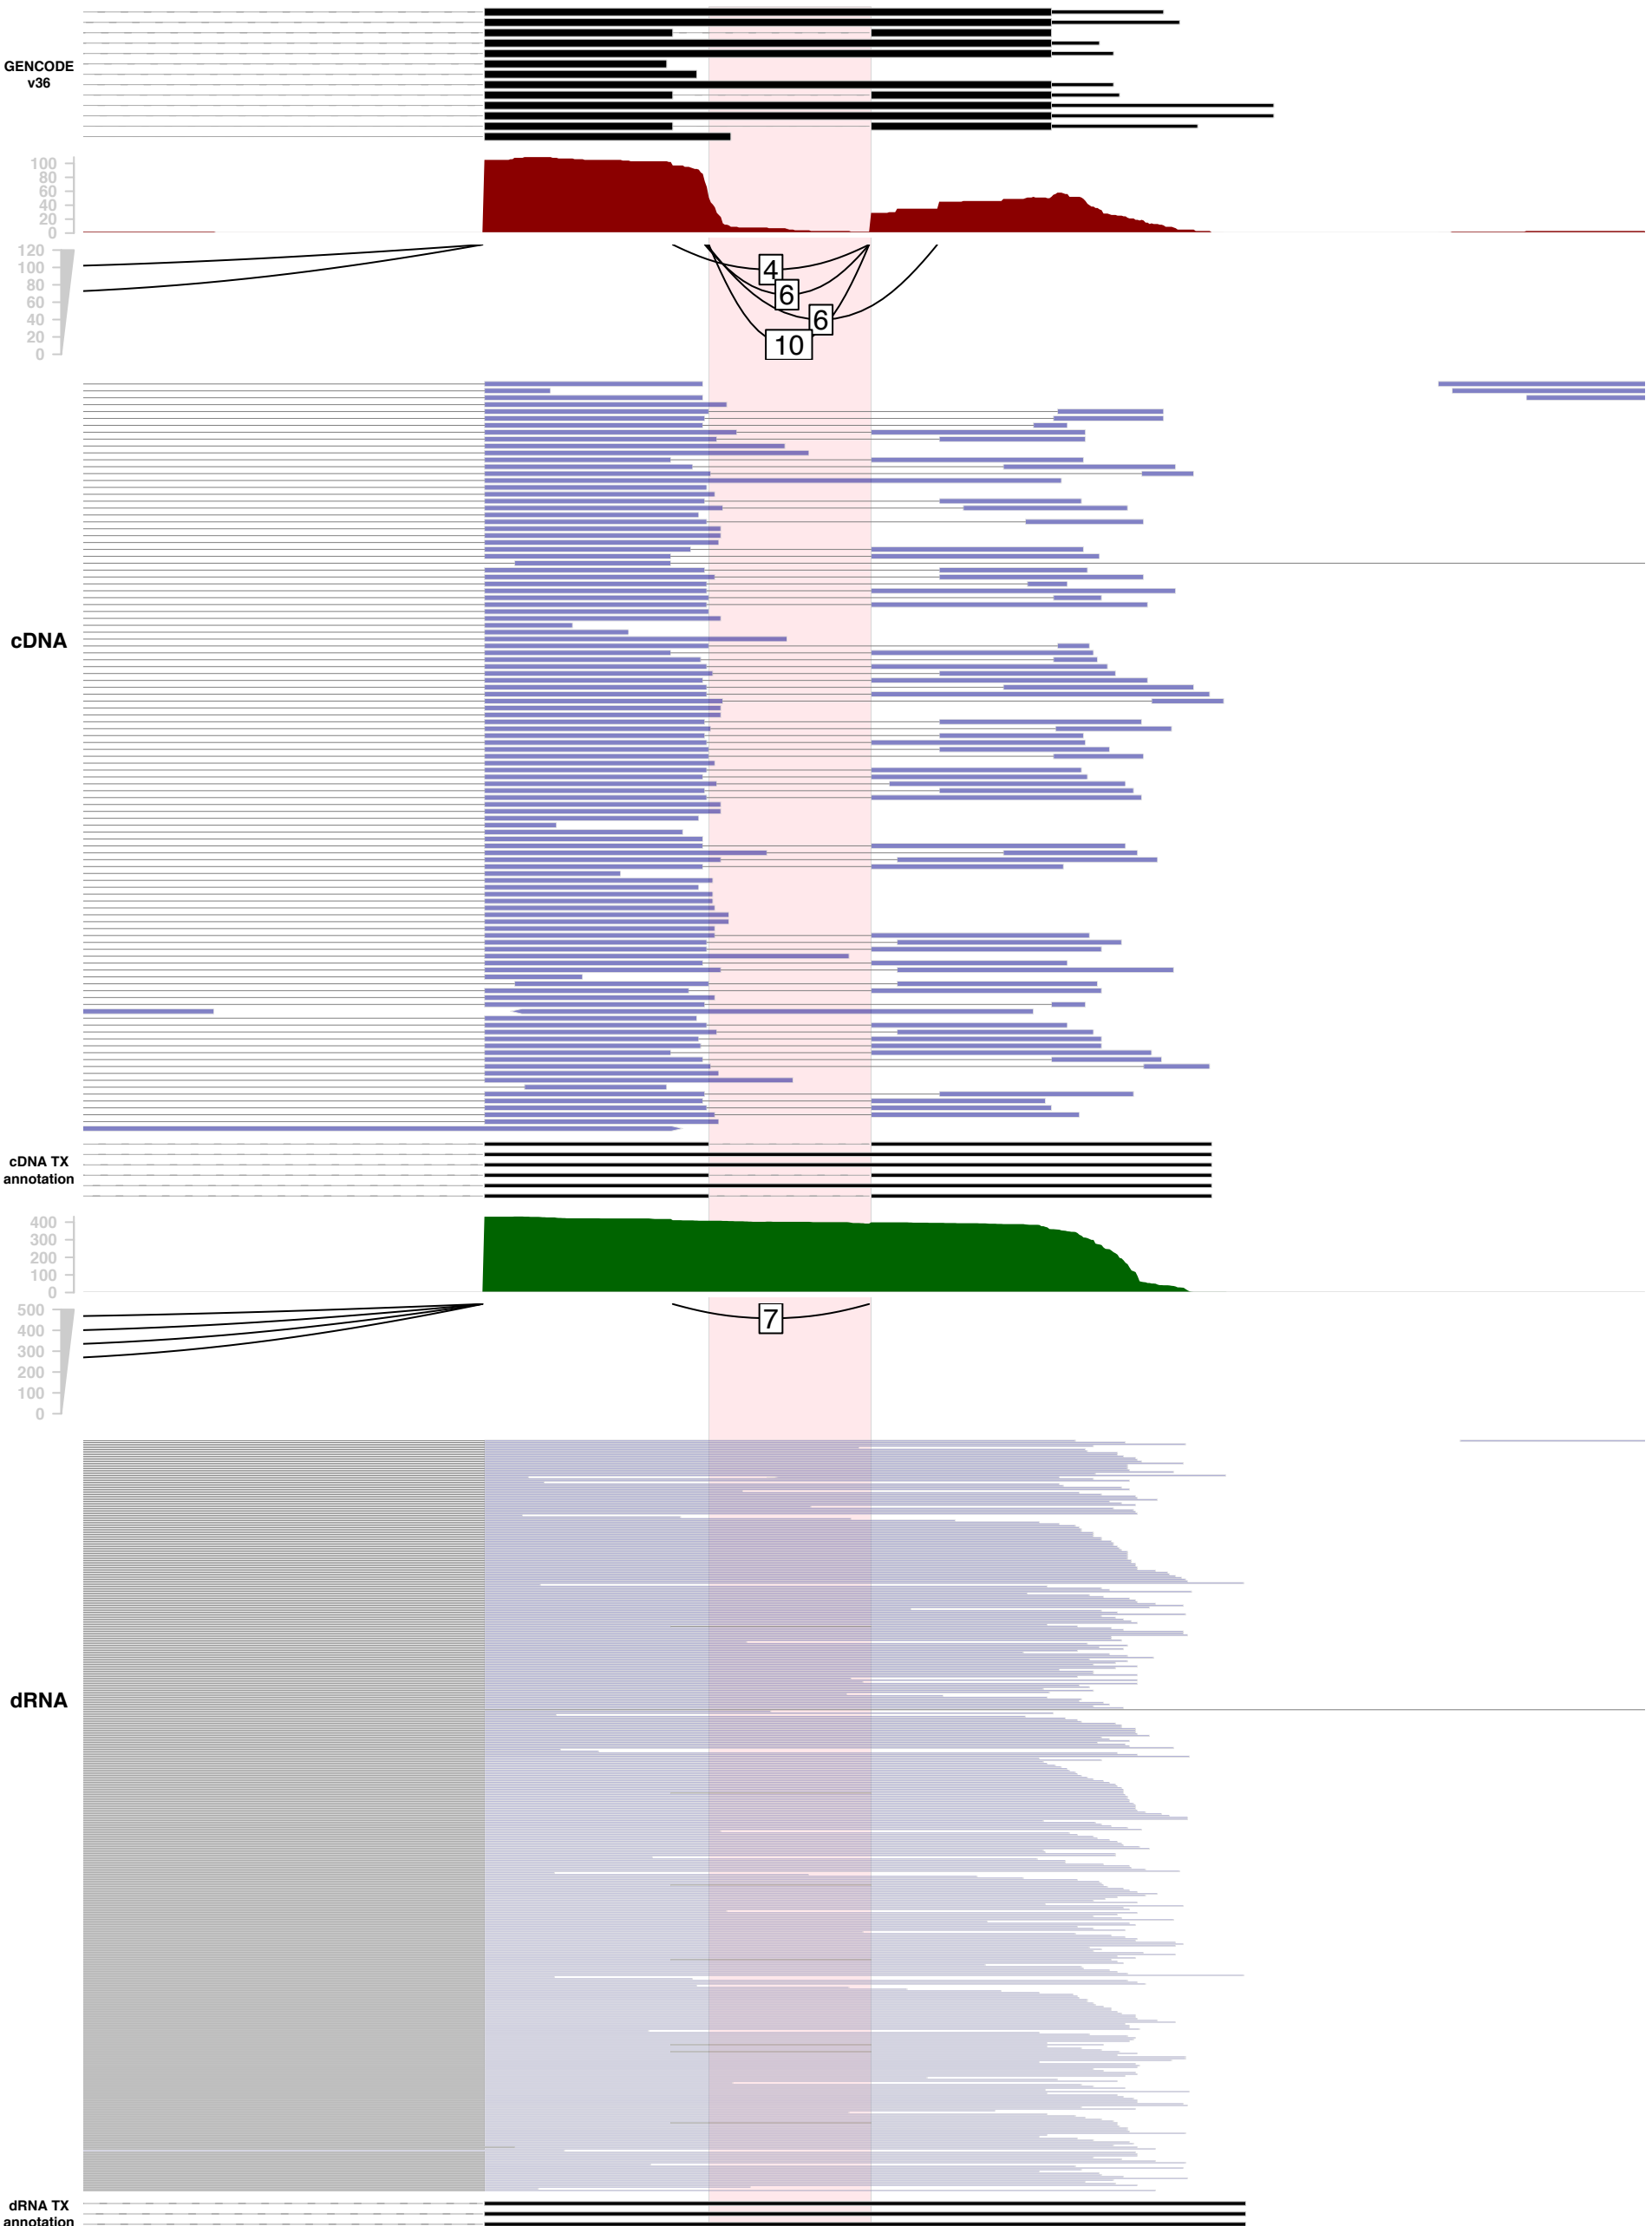

chr8:47976979-47977736:+ MCM4

Cell line: K562

GENCODE  
v36

ENSG00000104738.18

100  
50  
0  
70  
60  
50  
40  
30  
20  
10  
0

12

cDNA

cDNA TX  
annotation

60  
40  
20  
0  
60  
50  
40  
30  
20  
10  
0

8

cDNA

dcDNA TX  
annotation

200  
100  
0  
150  
100  
50  
0

dRNA

dRNA TX  
annotation

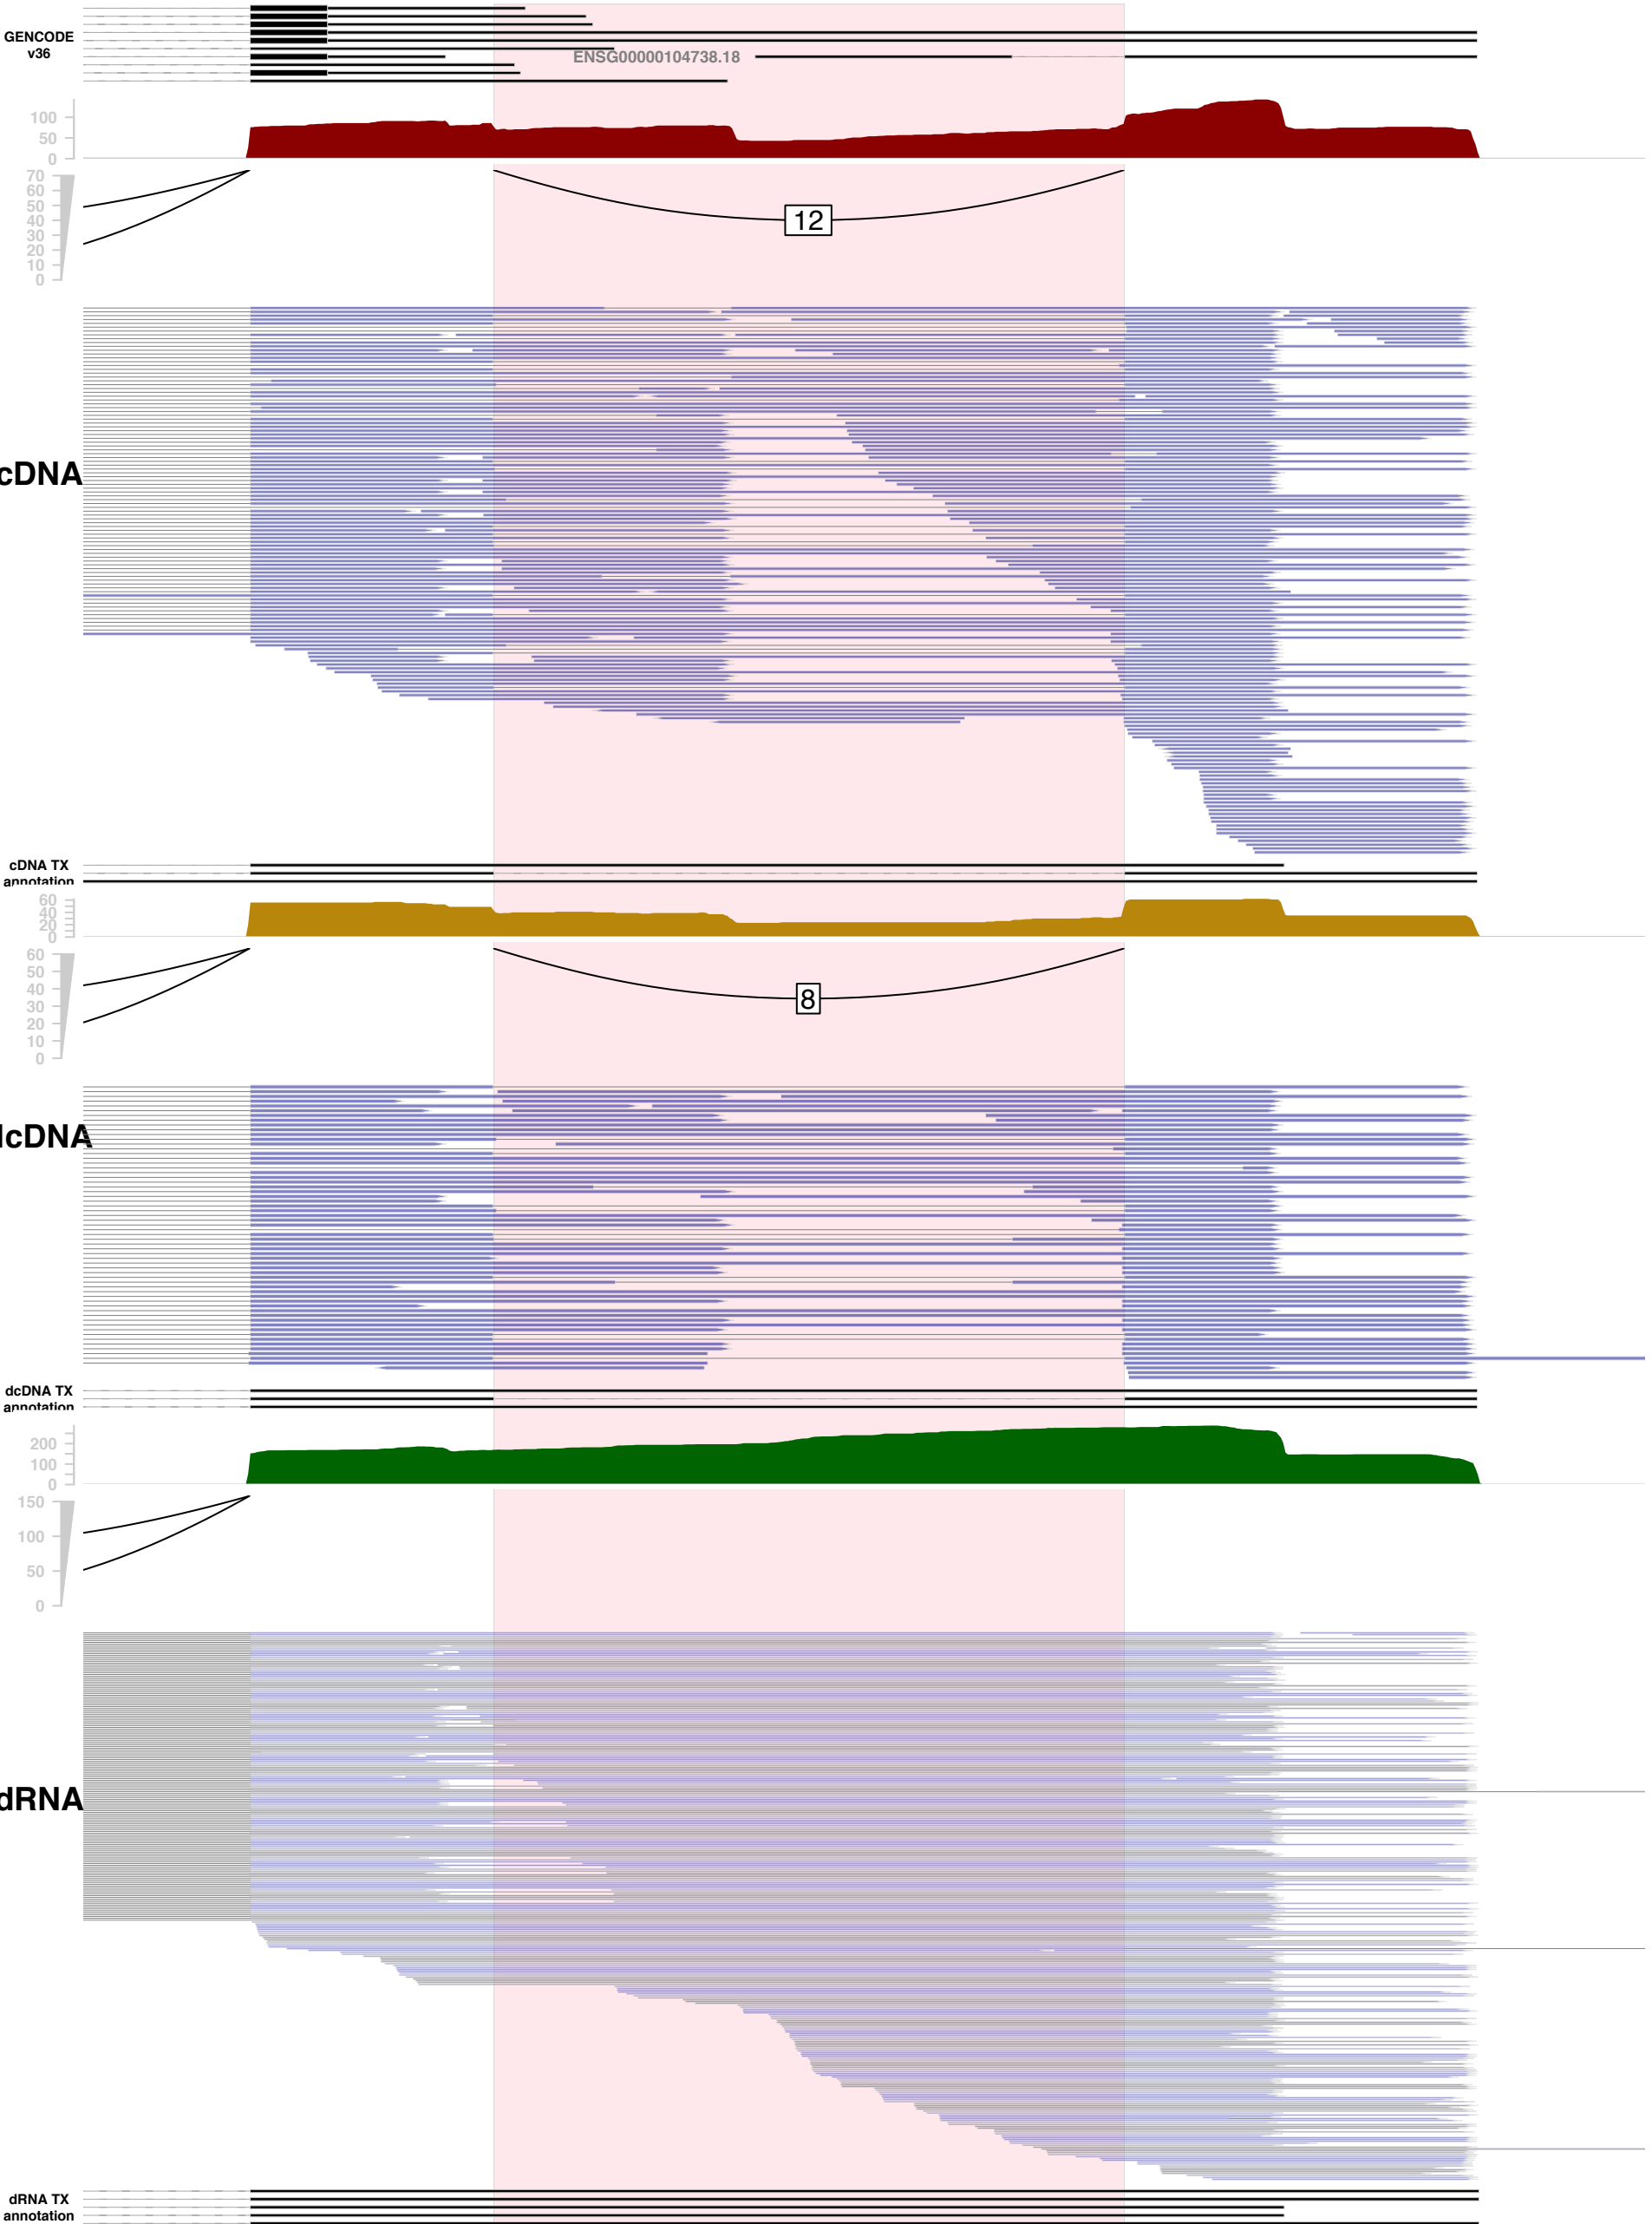

# chr9:127908169-127908317:- ST6GALNAC4

Cell line: K562

Direct repeat sequence: CTCCAC

GENCODE  
v36

ENSG00000136840.19

ENSG00000136840.19  
ENSG00000136840.19  
ENSG00000136840.19

ENSG00000136840.19

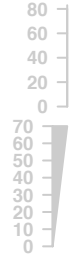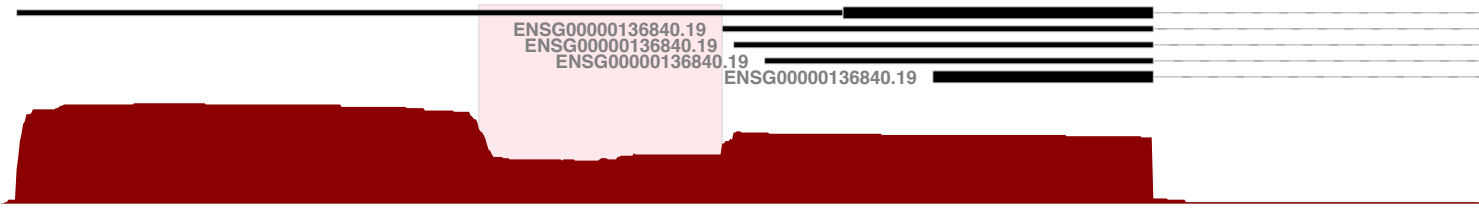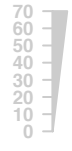

cDNA

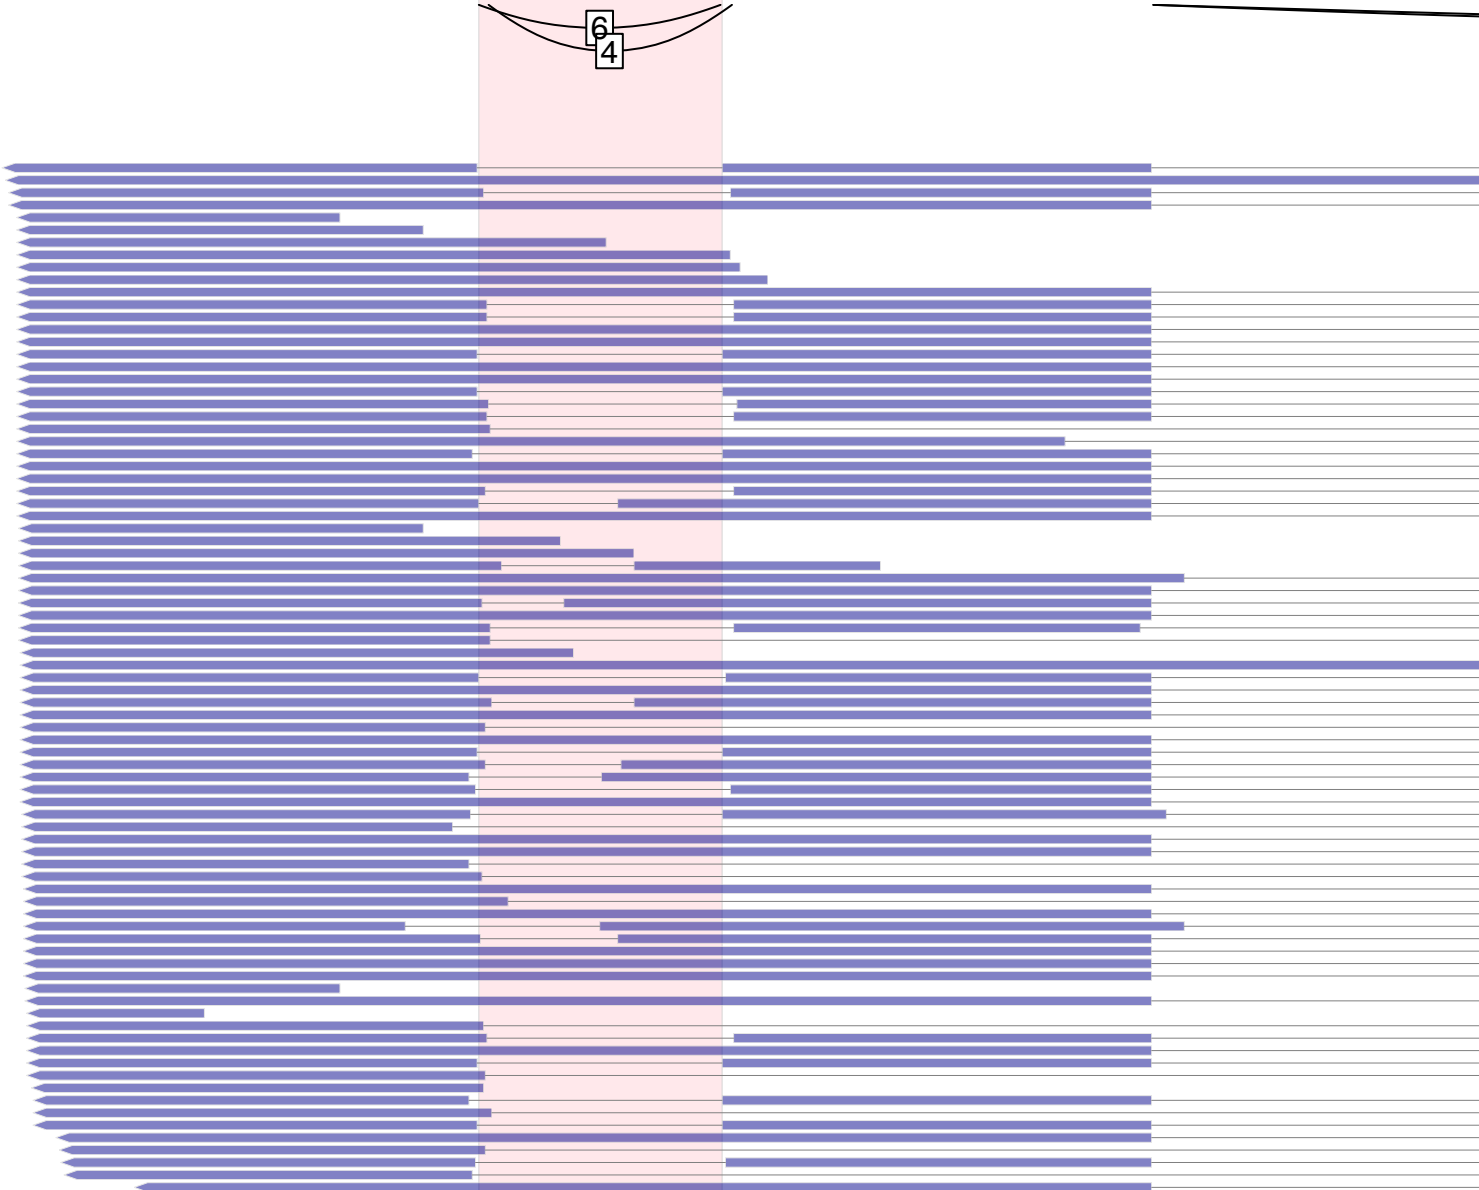

cDNA TX  
annotation

STR.37..69  
STR.37..69  
STR.37..69  
STR.37..69  
STR.37..69  
STR.37..69

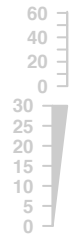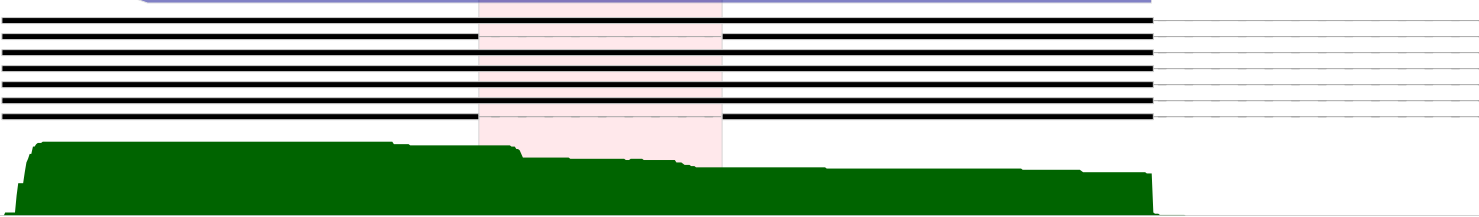

dRNA

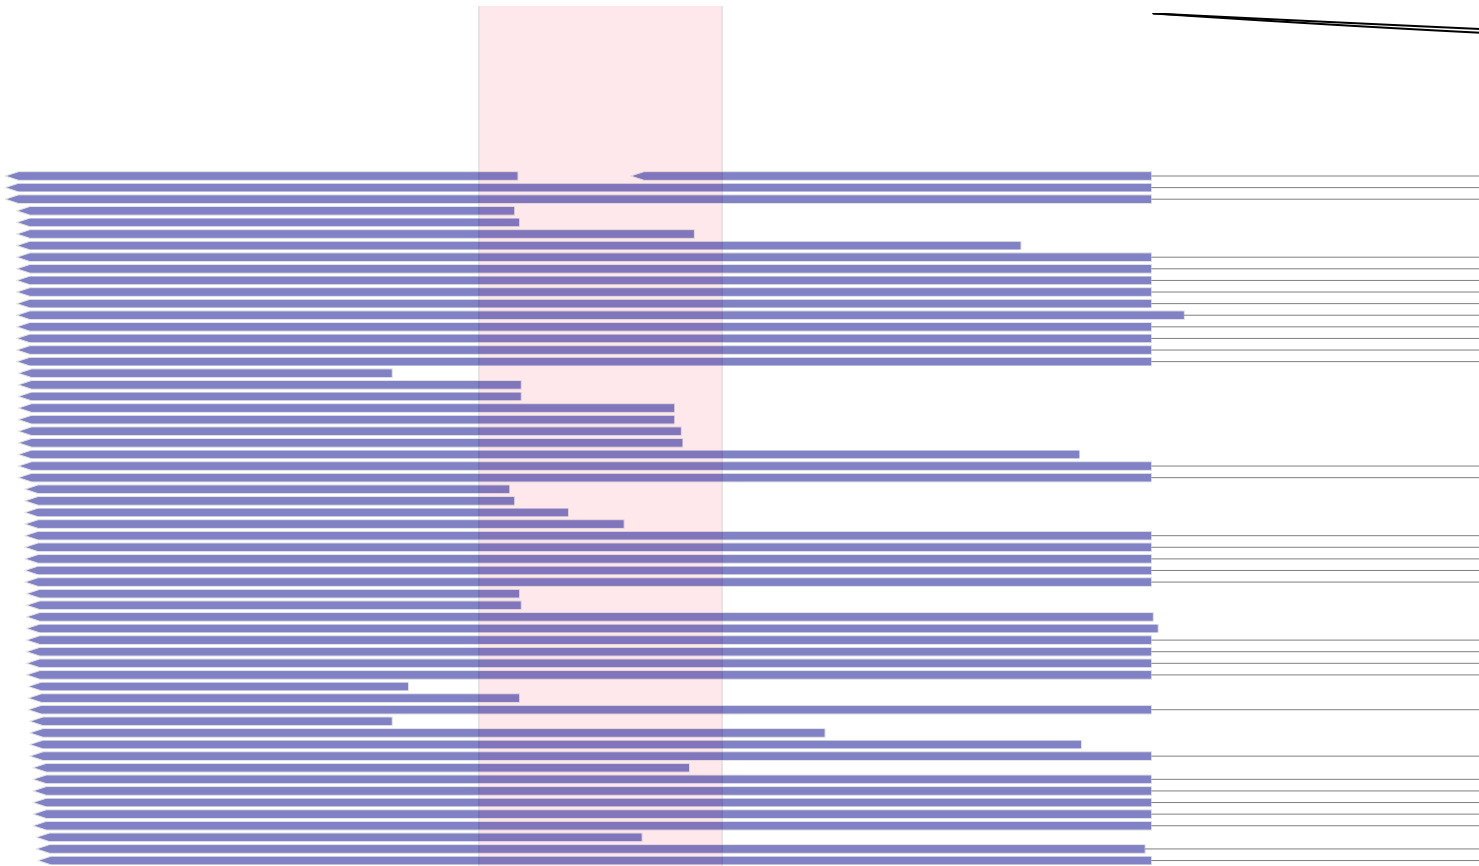

dRNA TX  
annotation

STR.20..248  
STR.20..248  
STR.20..248  
STR.20..248



chr11:6704862-6705515:+

Cell line: K562

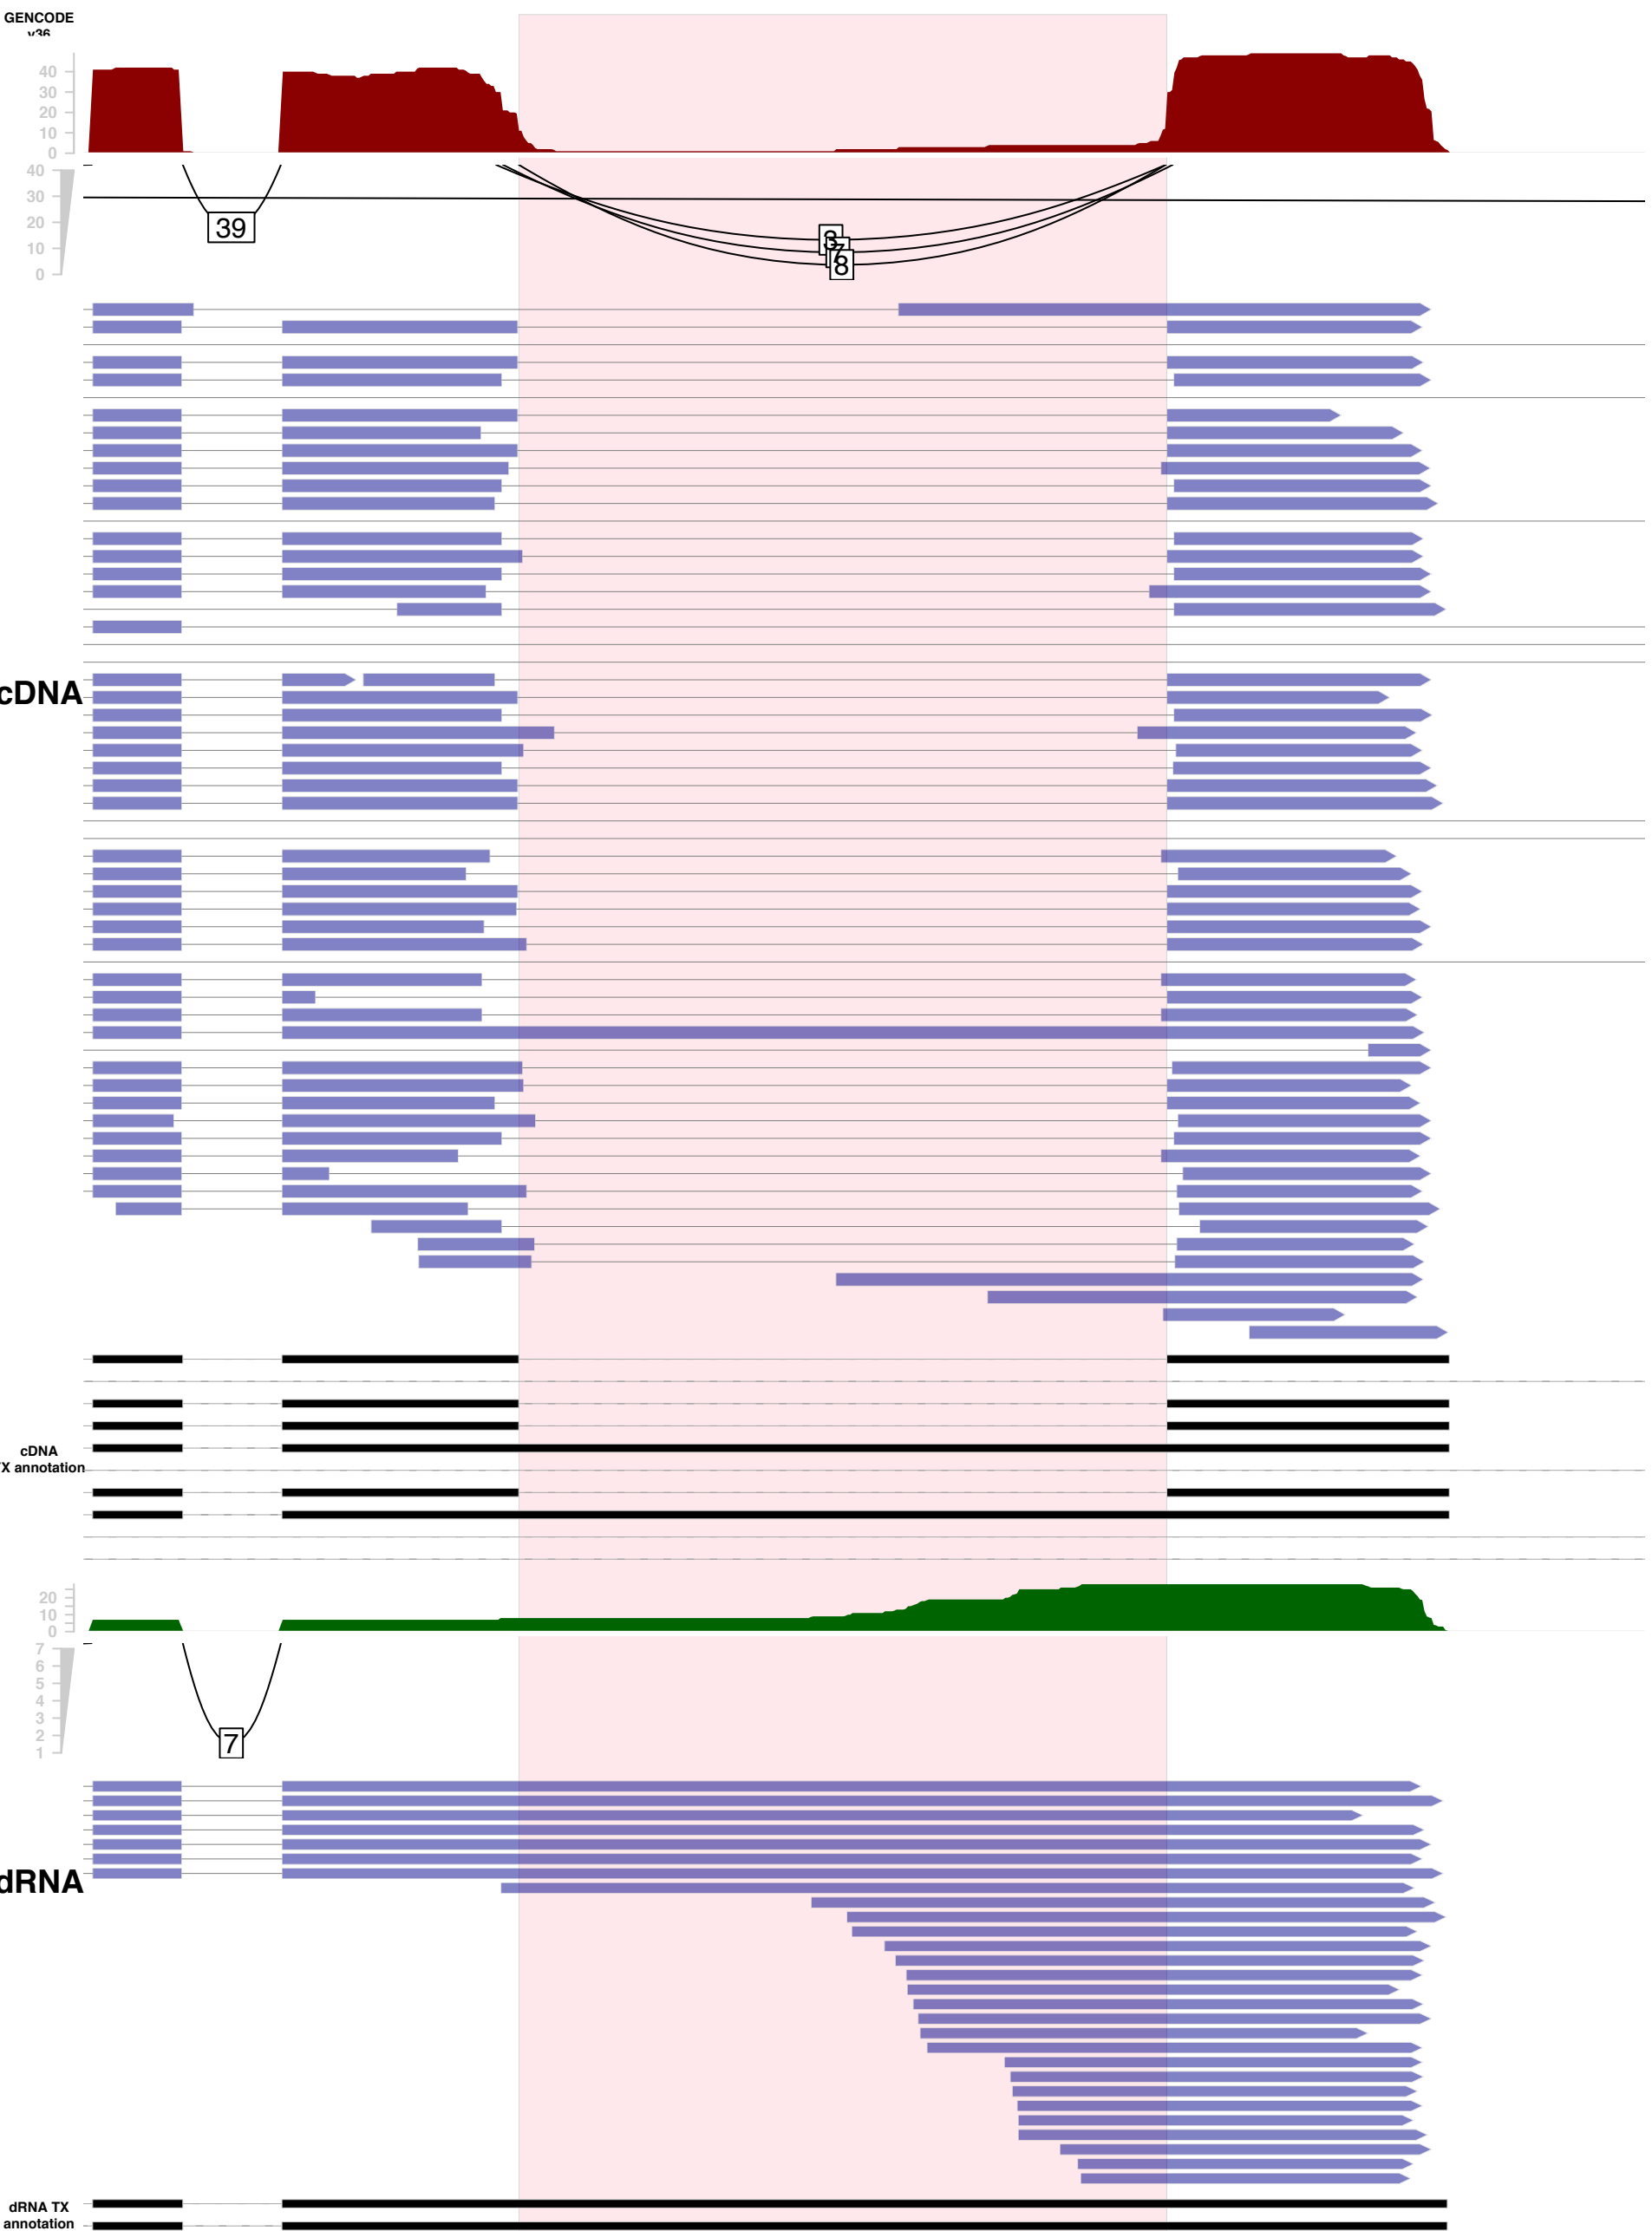

chr12:62965697-62965963:+ RPL14P1

Cell line: K562

Direct repeat sequence: CAAGAA

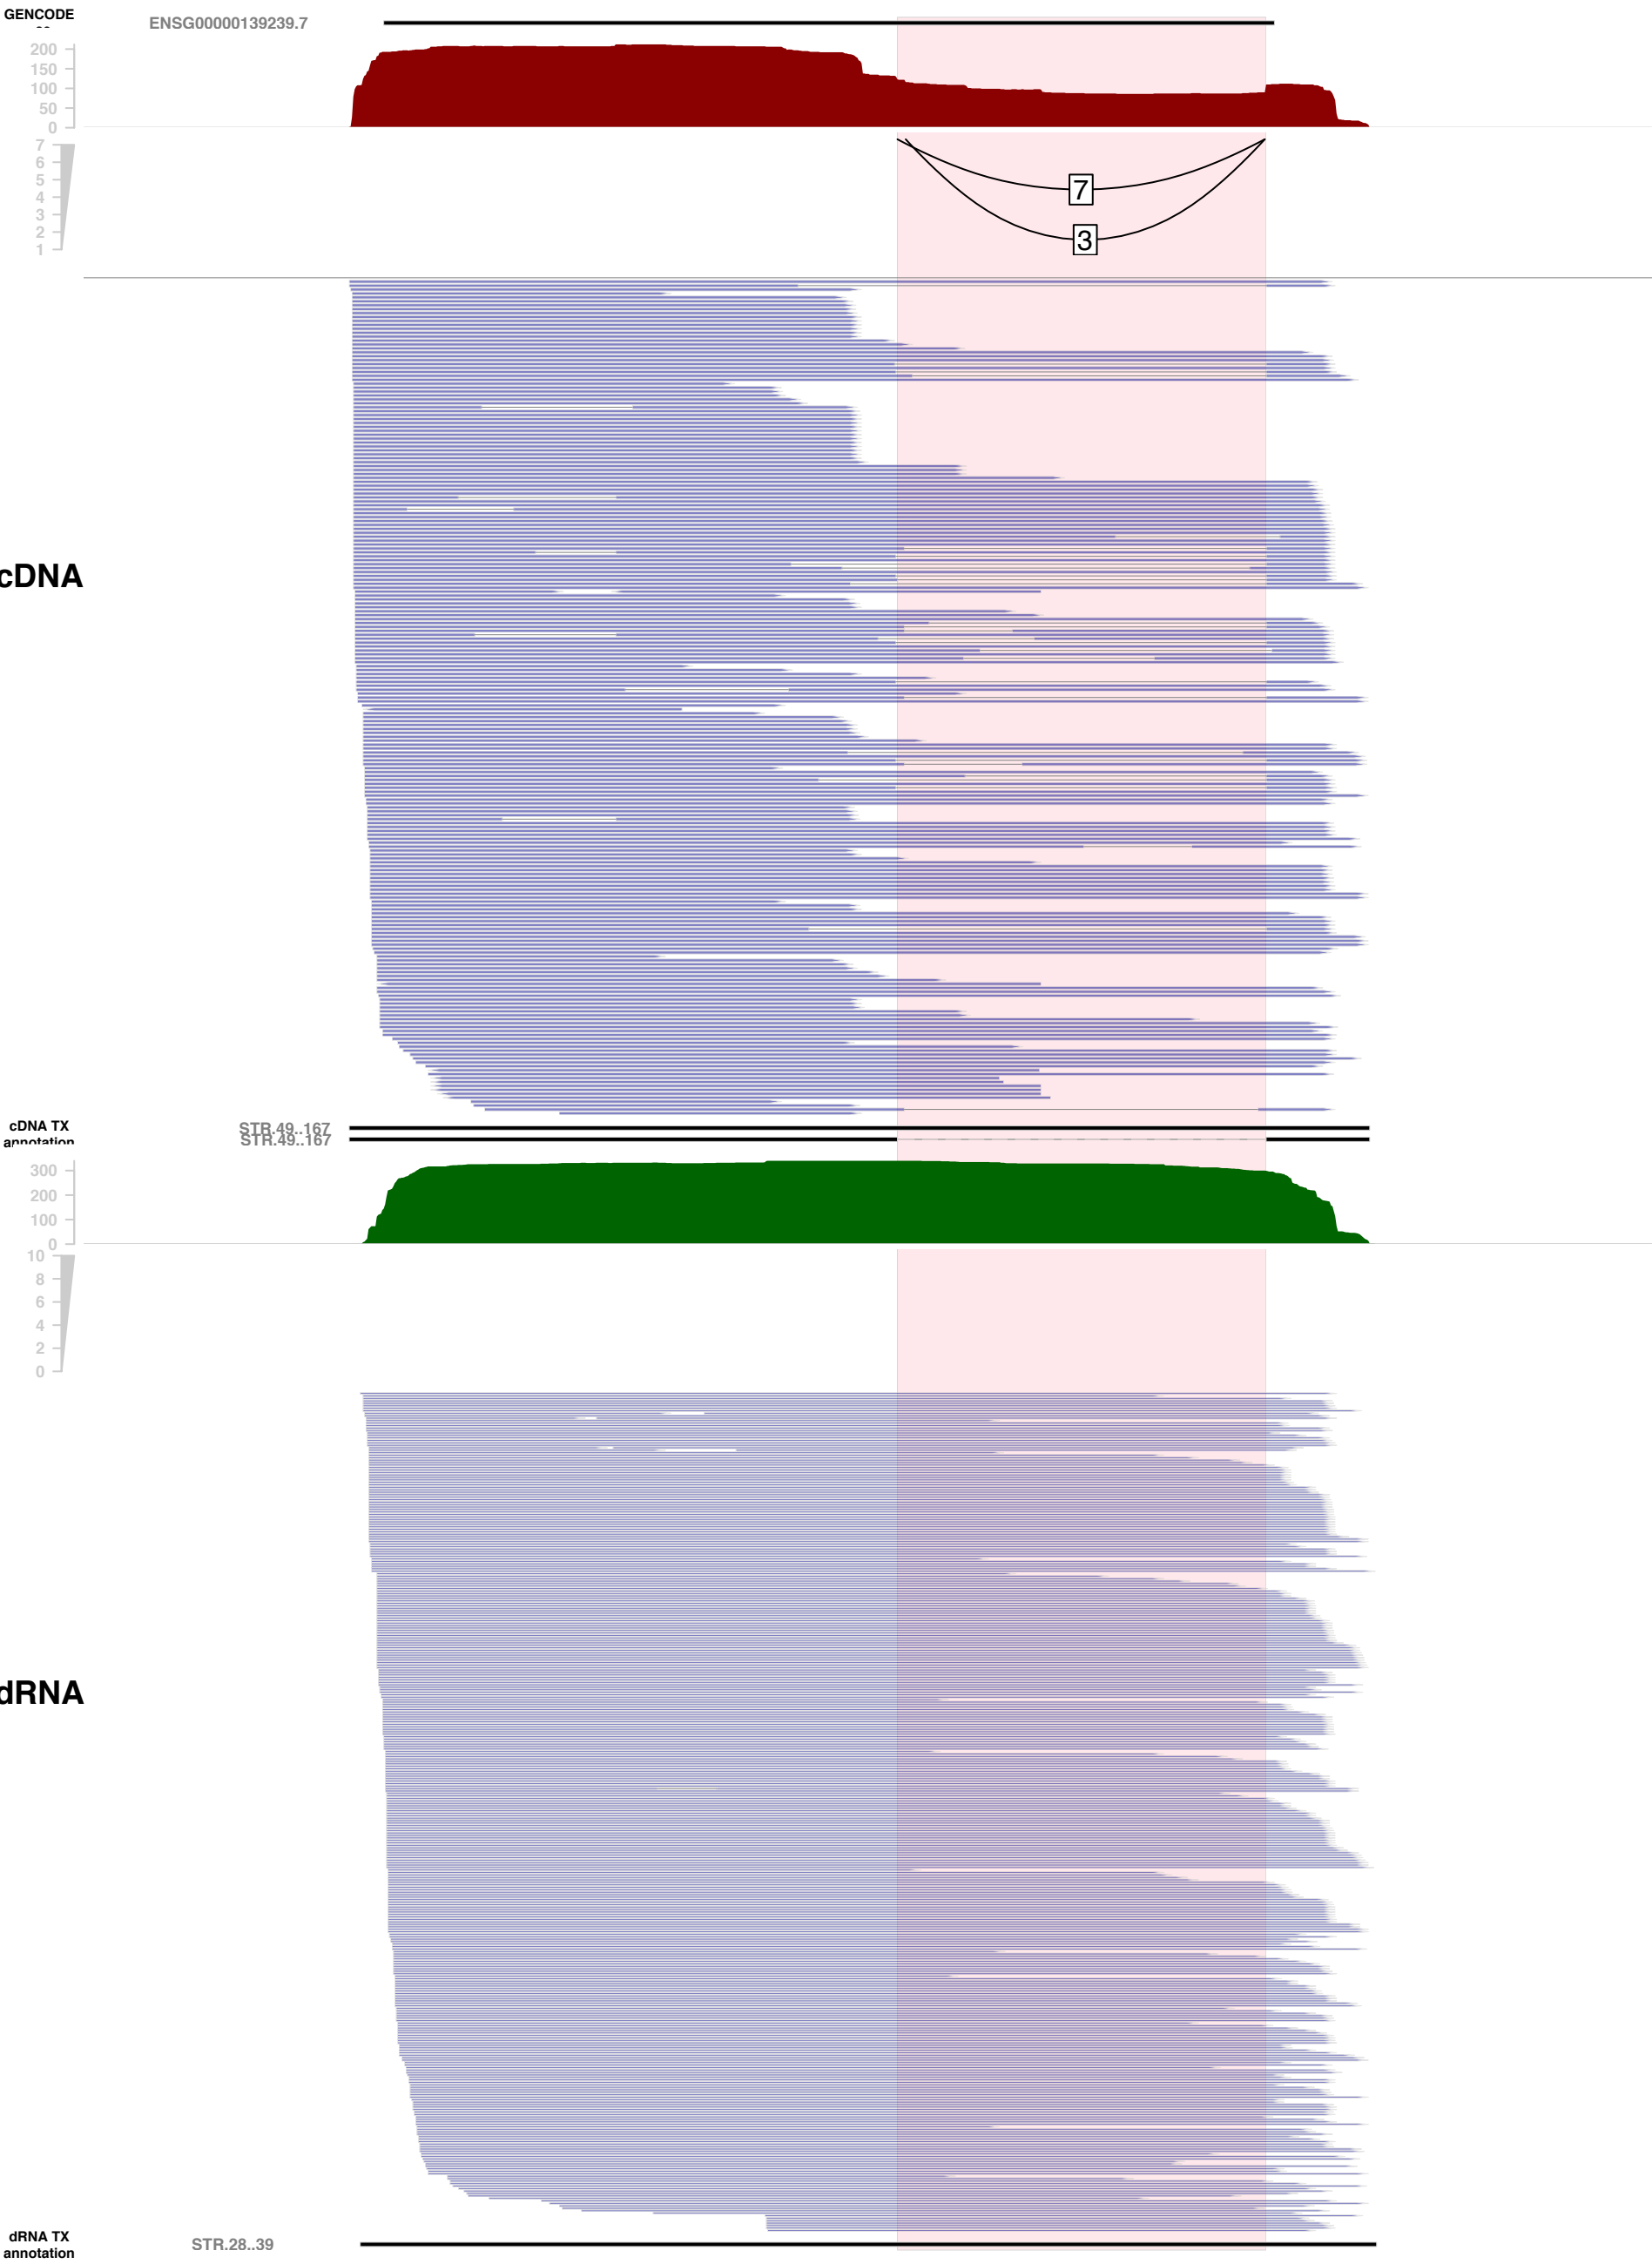

chr17:3663563-3663657:- TAX1BP3,P2RX5-TAX1BP3

Cell line: K562

Direct repeat sequence: GACCG

GENCODE v36  
ENSG00000213977.8  
ENSG00000213977.8  
ENSG00000257950.3

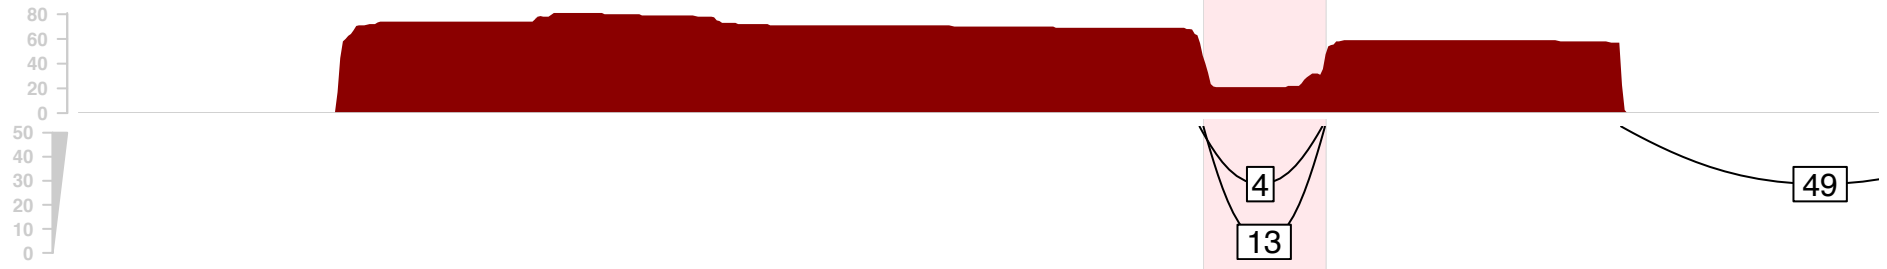

cDNA

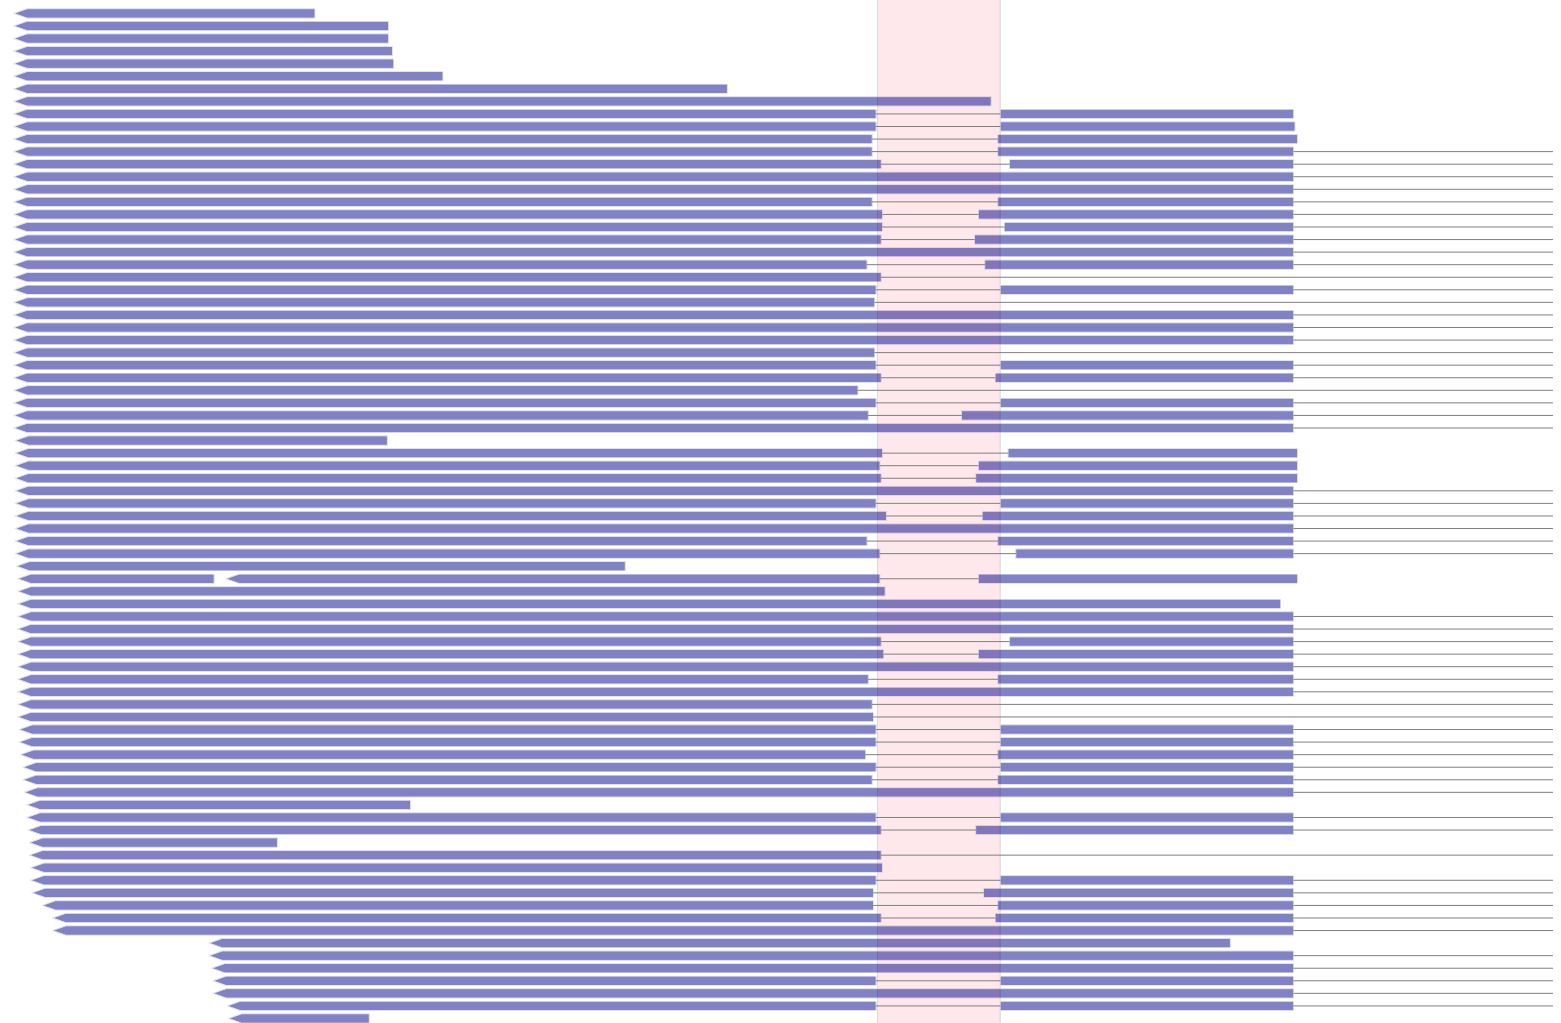

cDNA TX annotation

STR.59..472  
STR.59..472  
STR.59..472

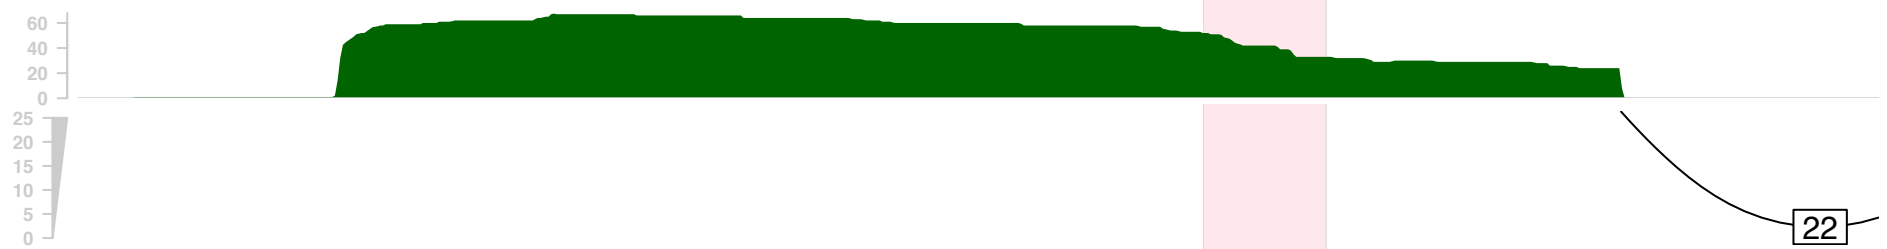

dRNA

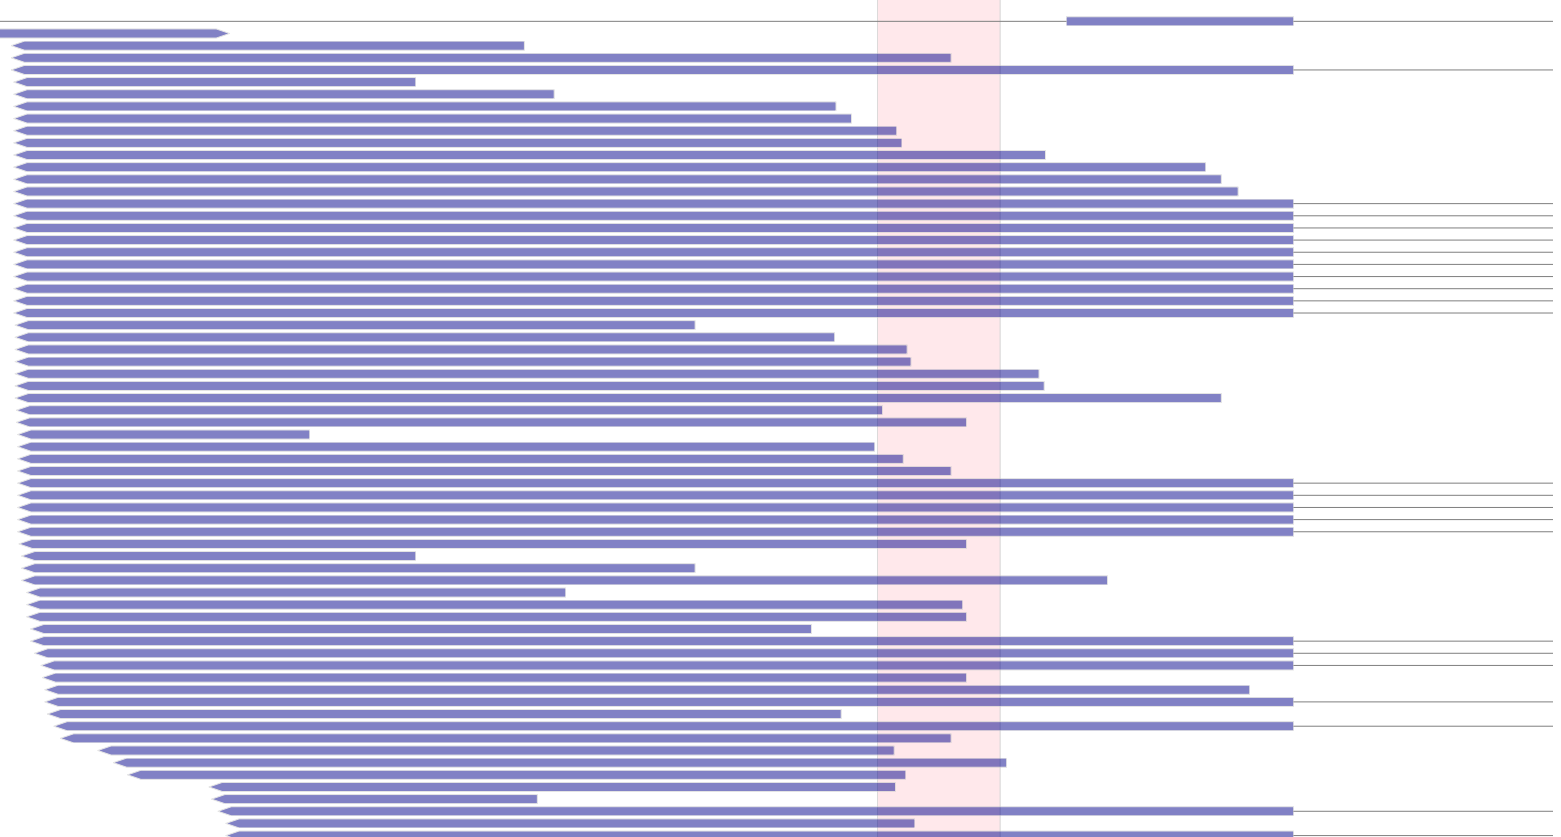

dRNA TX annotation

STR.34..193

chr19:35746759-35746910:+ PSENEN,AC002398.9

Cell line: K562

Direct repeat sequence: CCTG

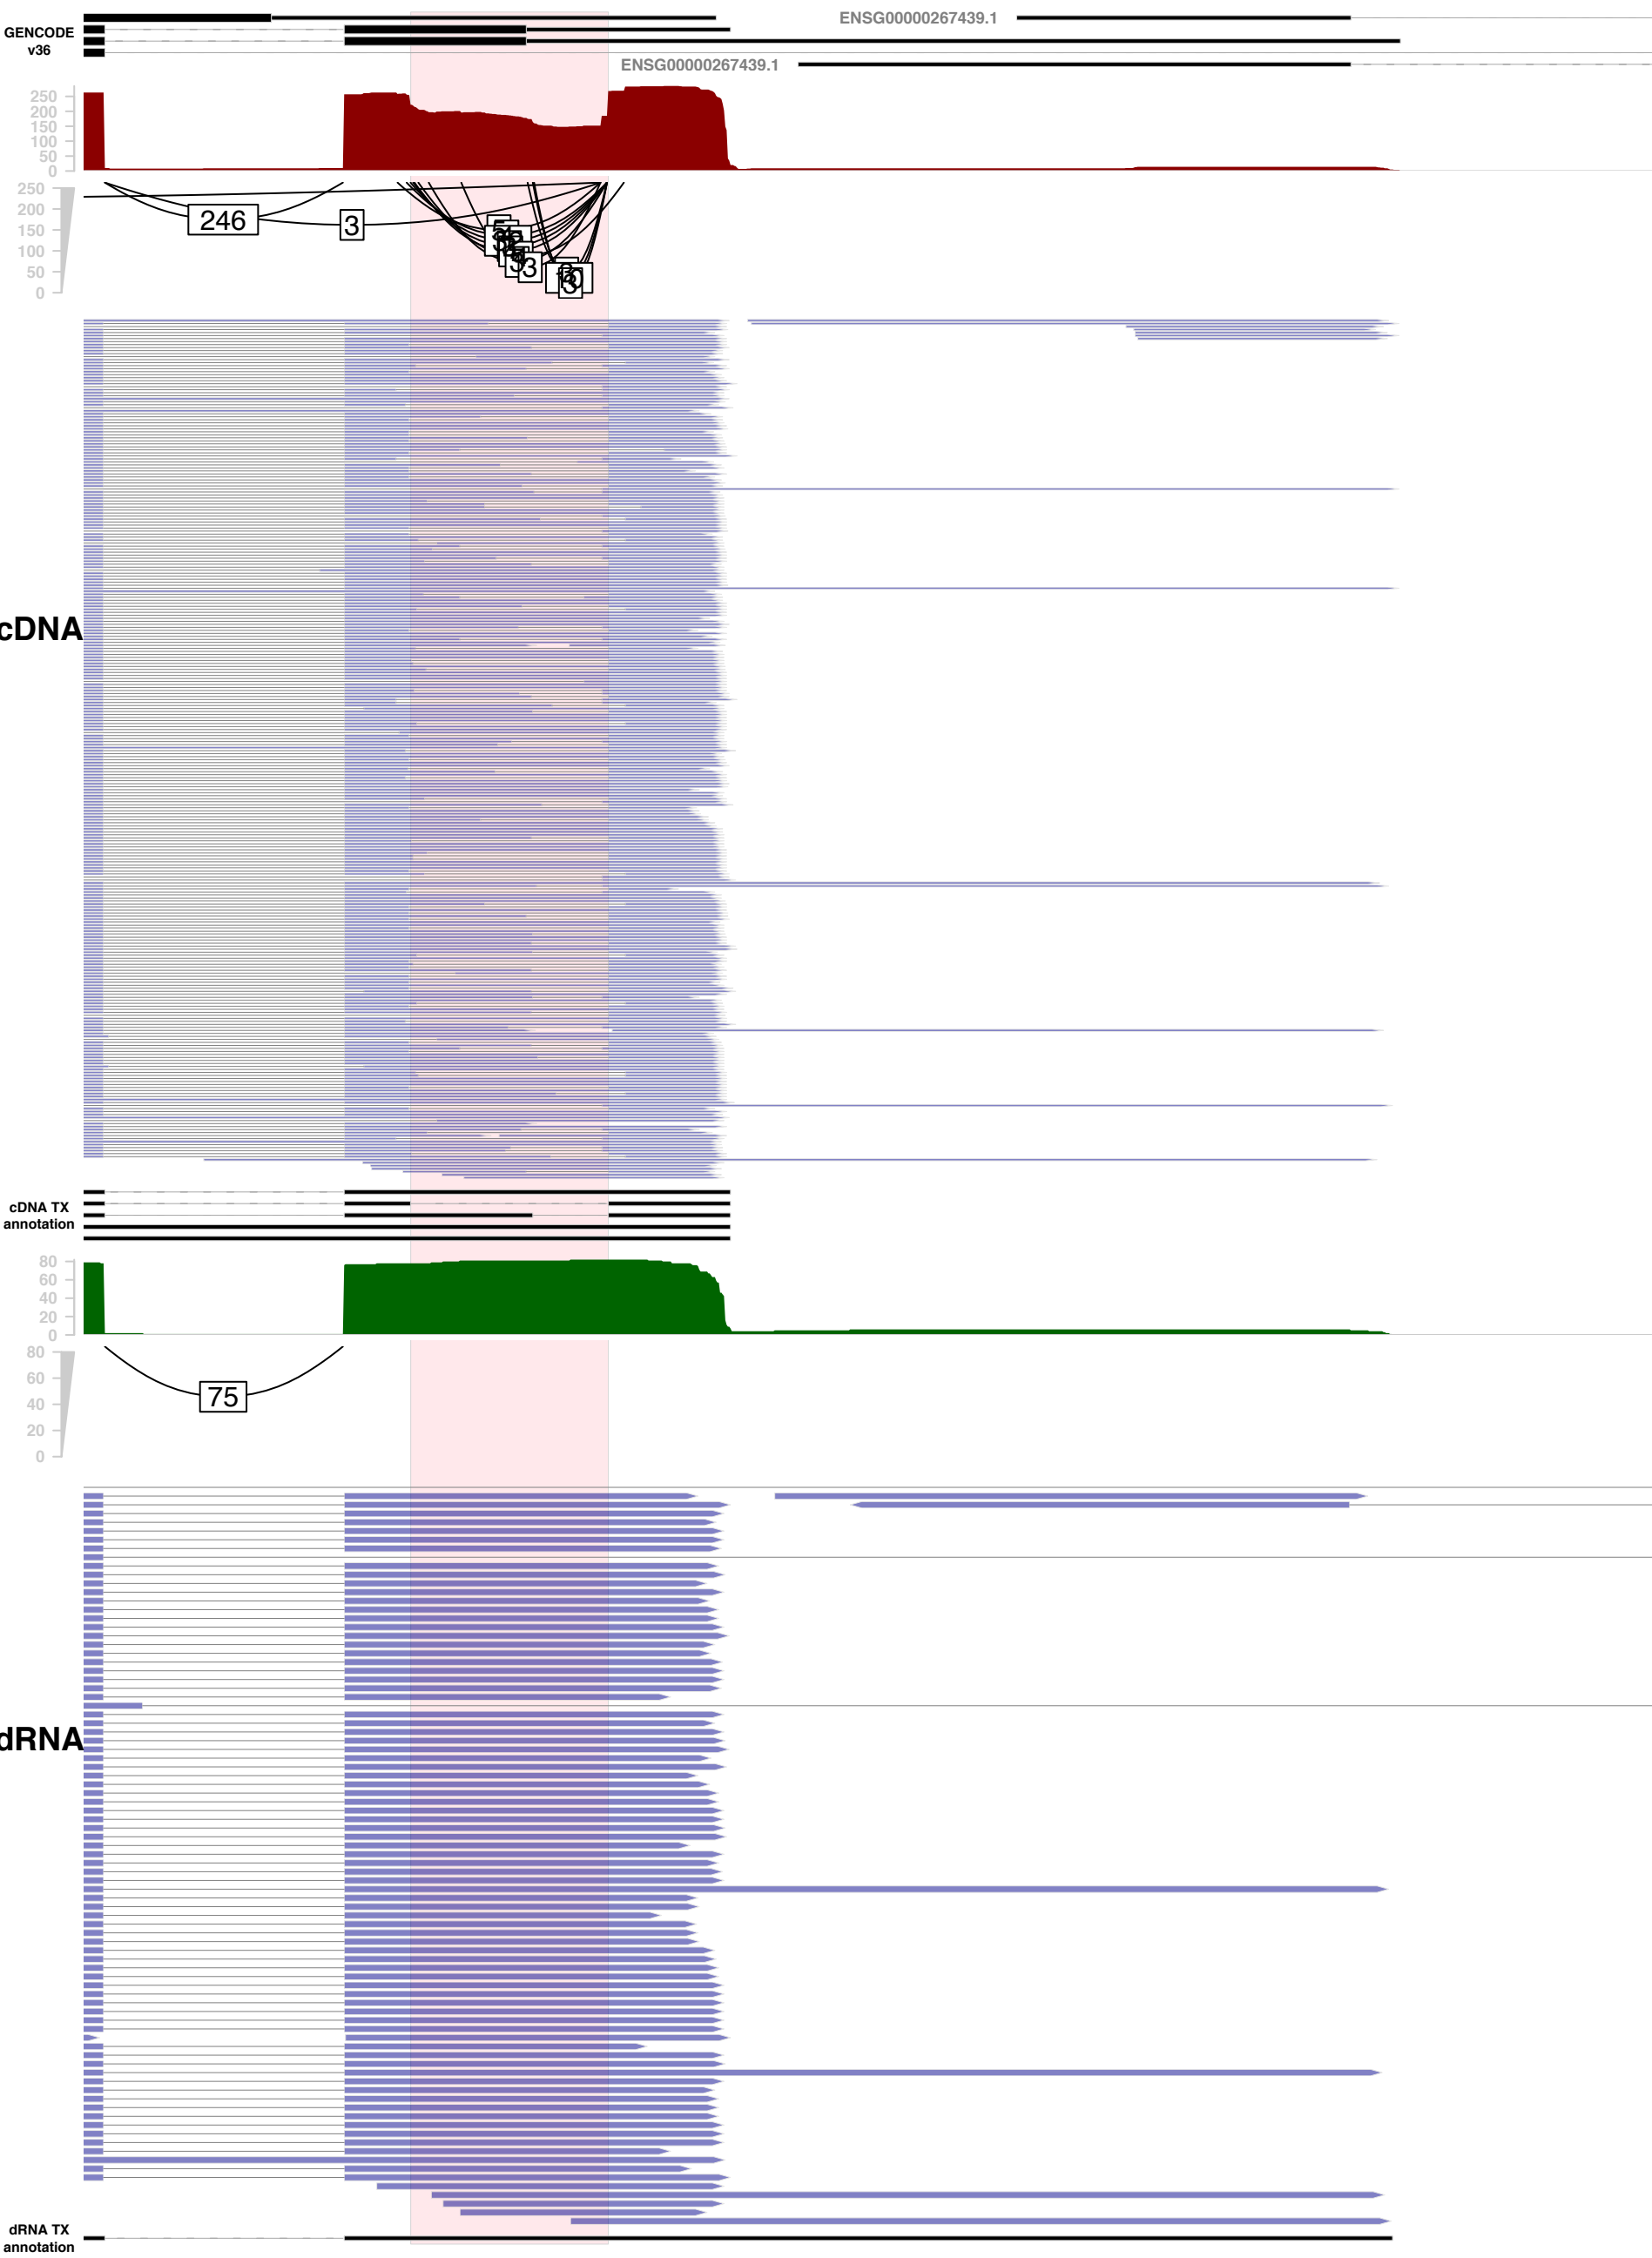

chr19:35746853-35746910:+ PSENEN,AC002398.9

Cell line: K562

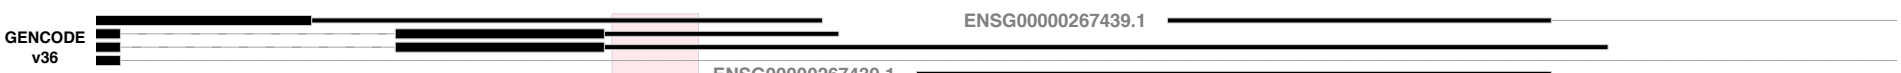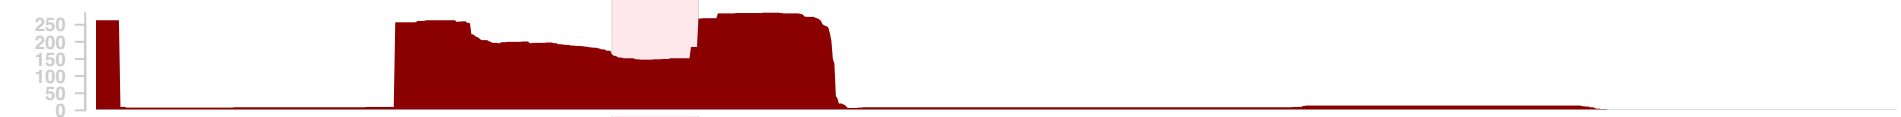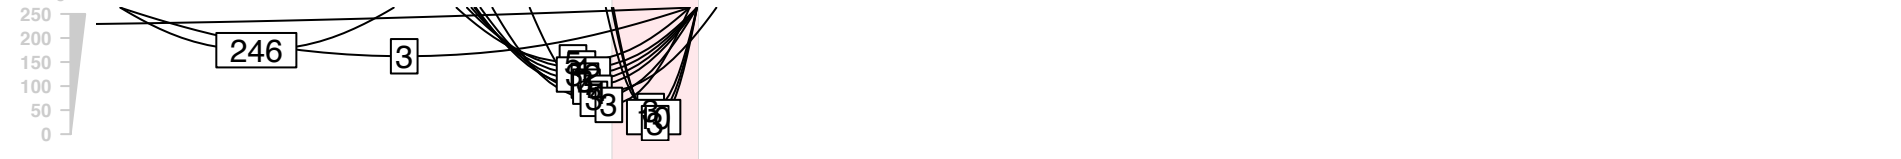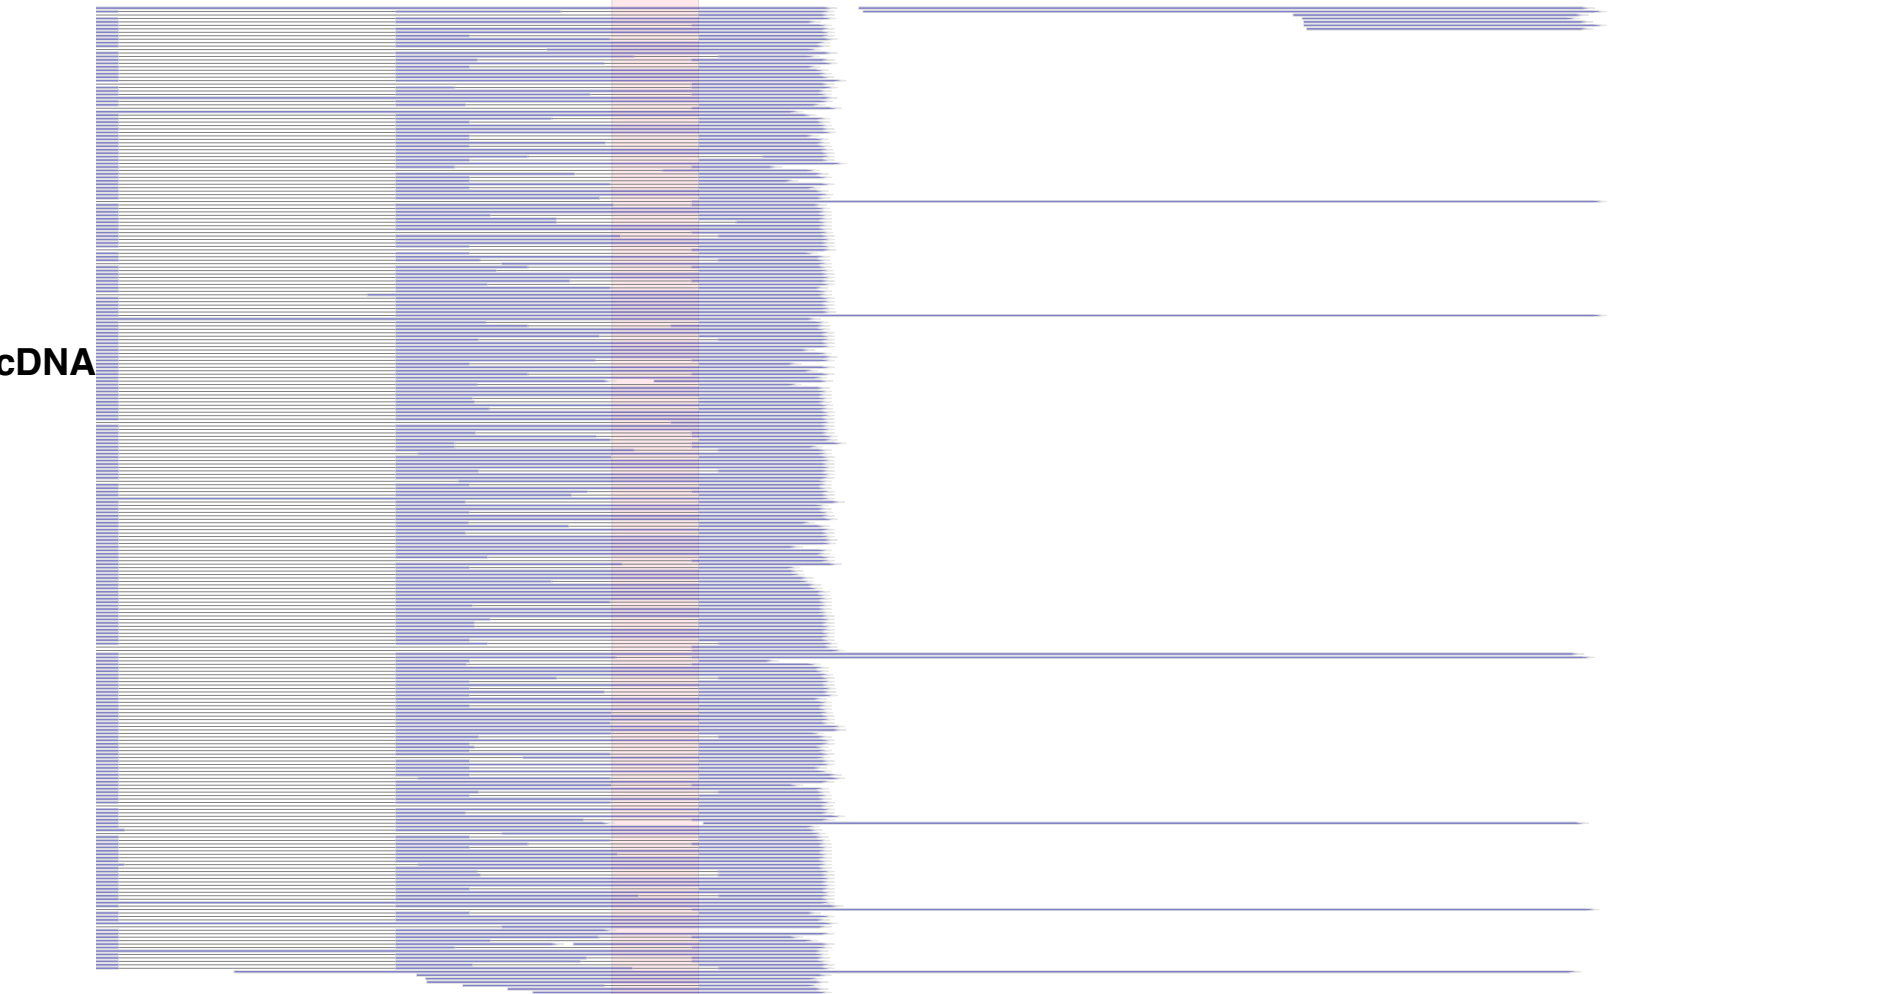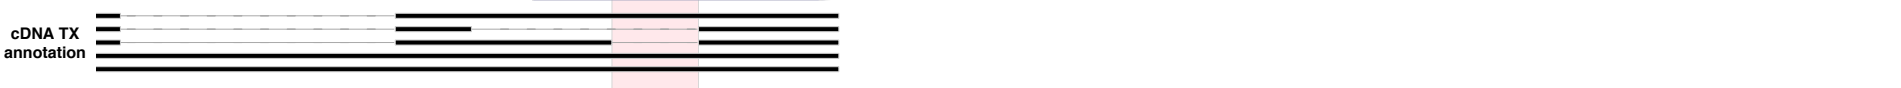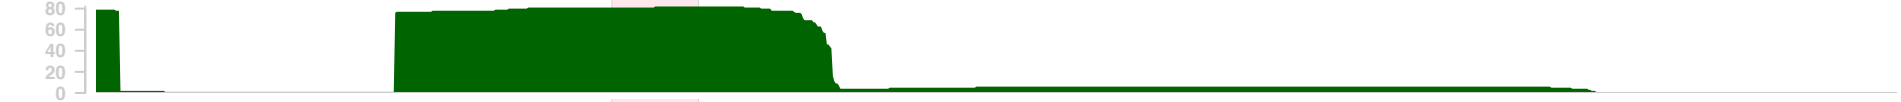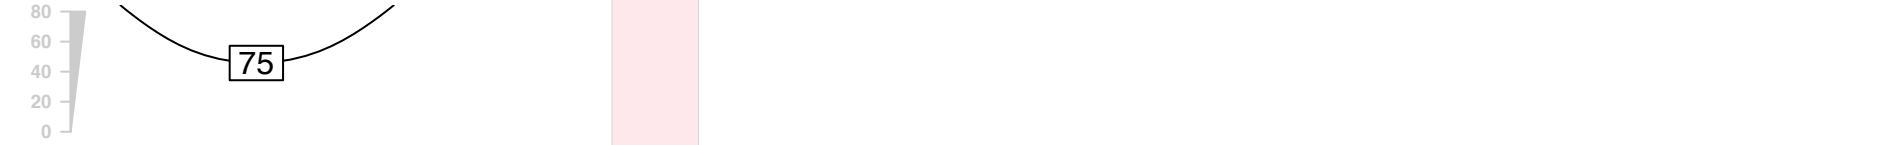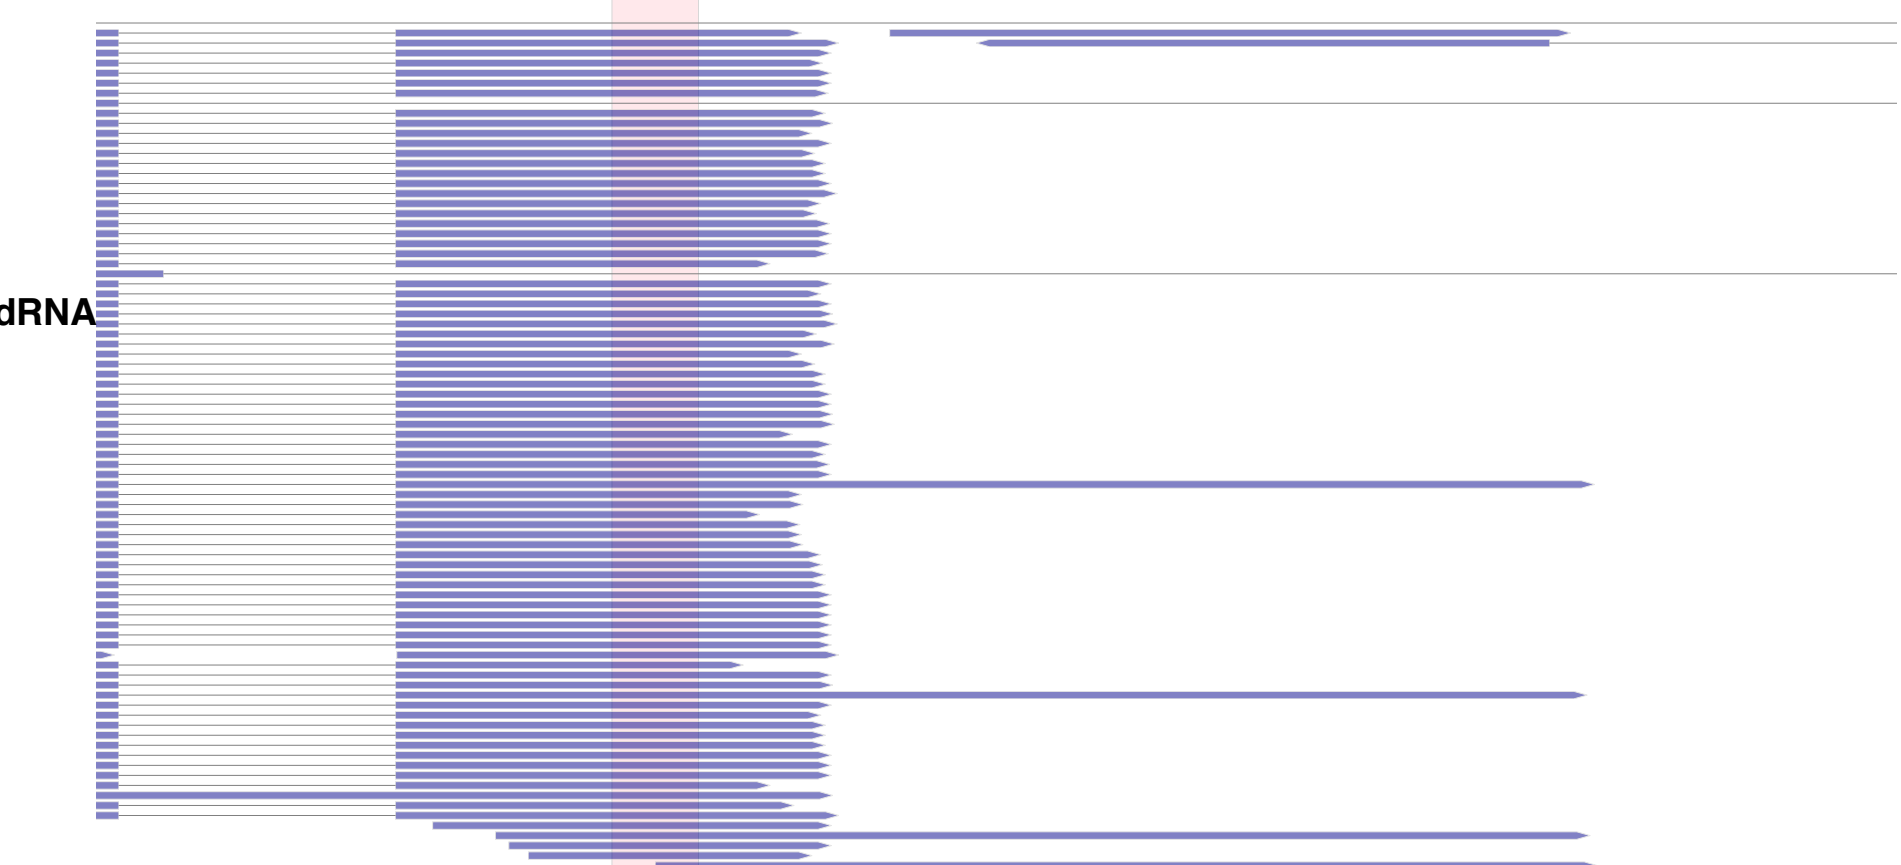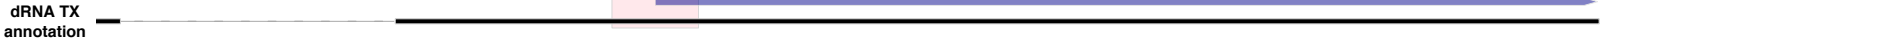

chr20:58891551-58891720:+ GNAS

Cell line: K562

Direct repeat sequence: CCGCC

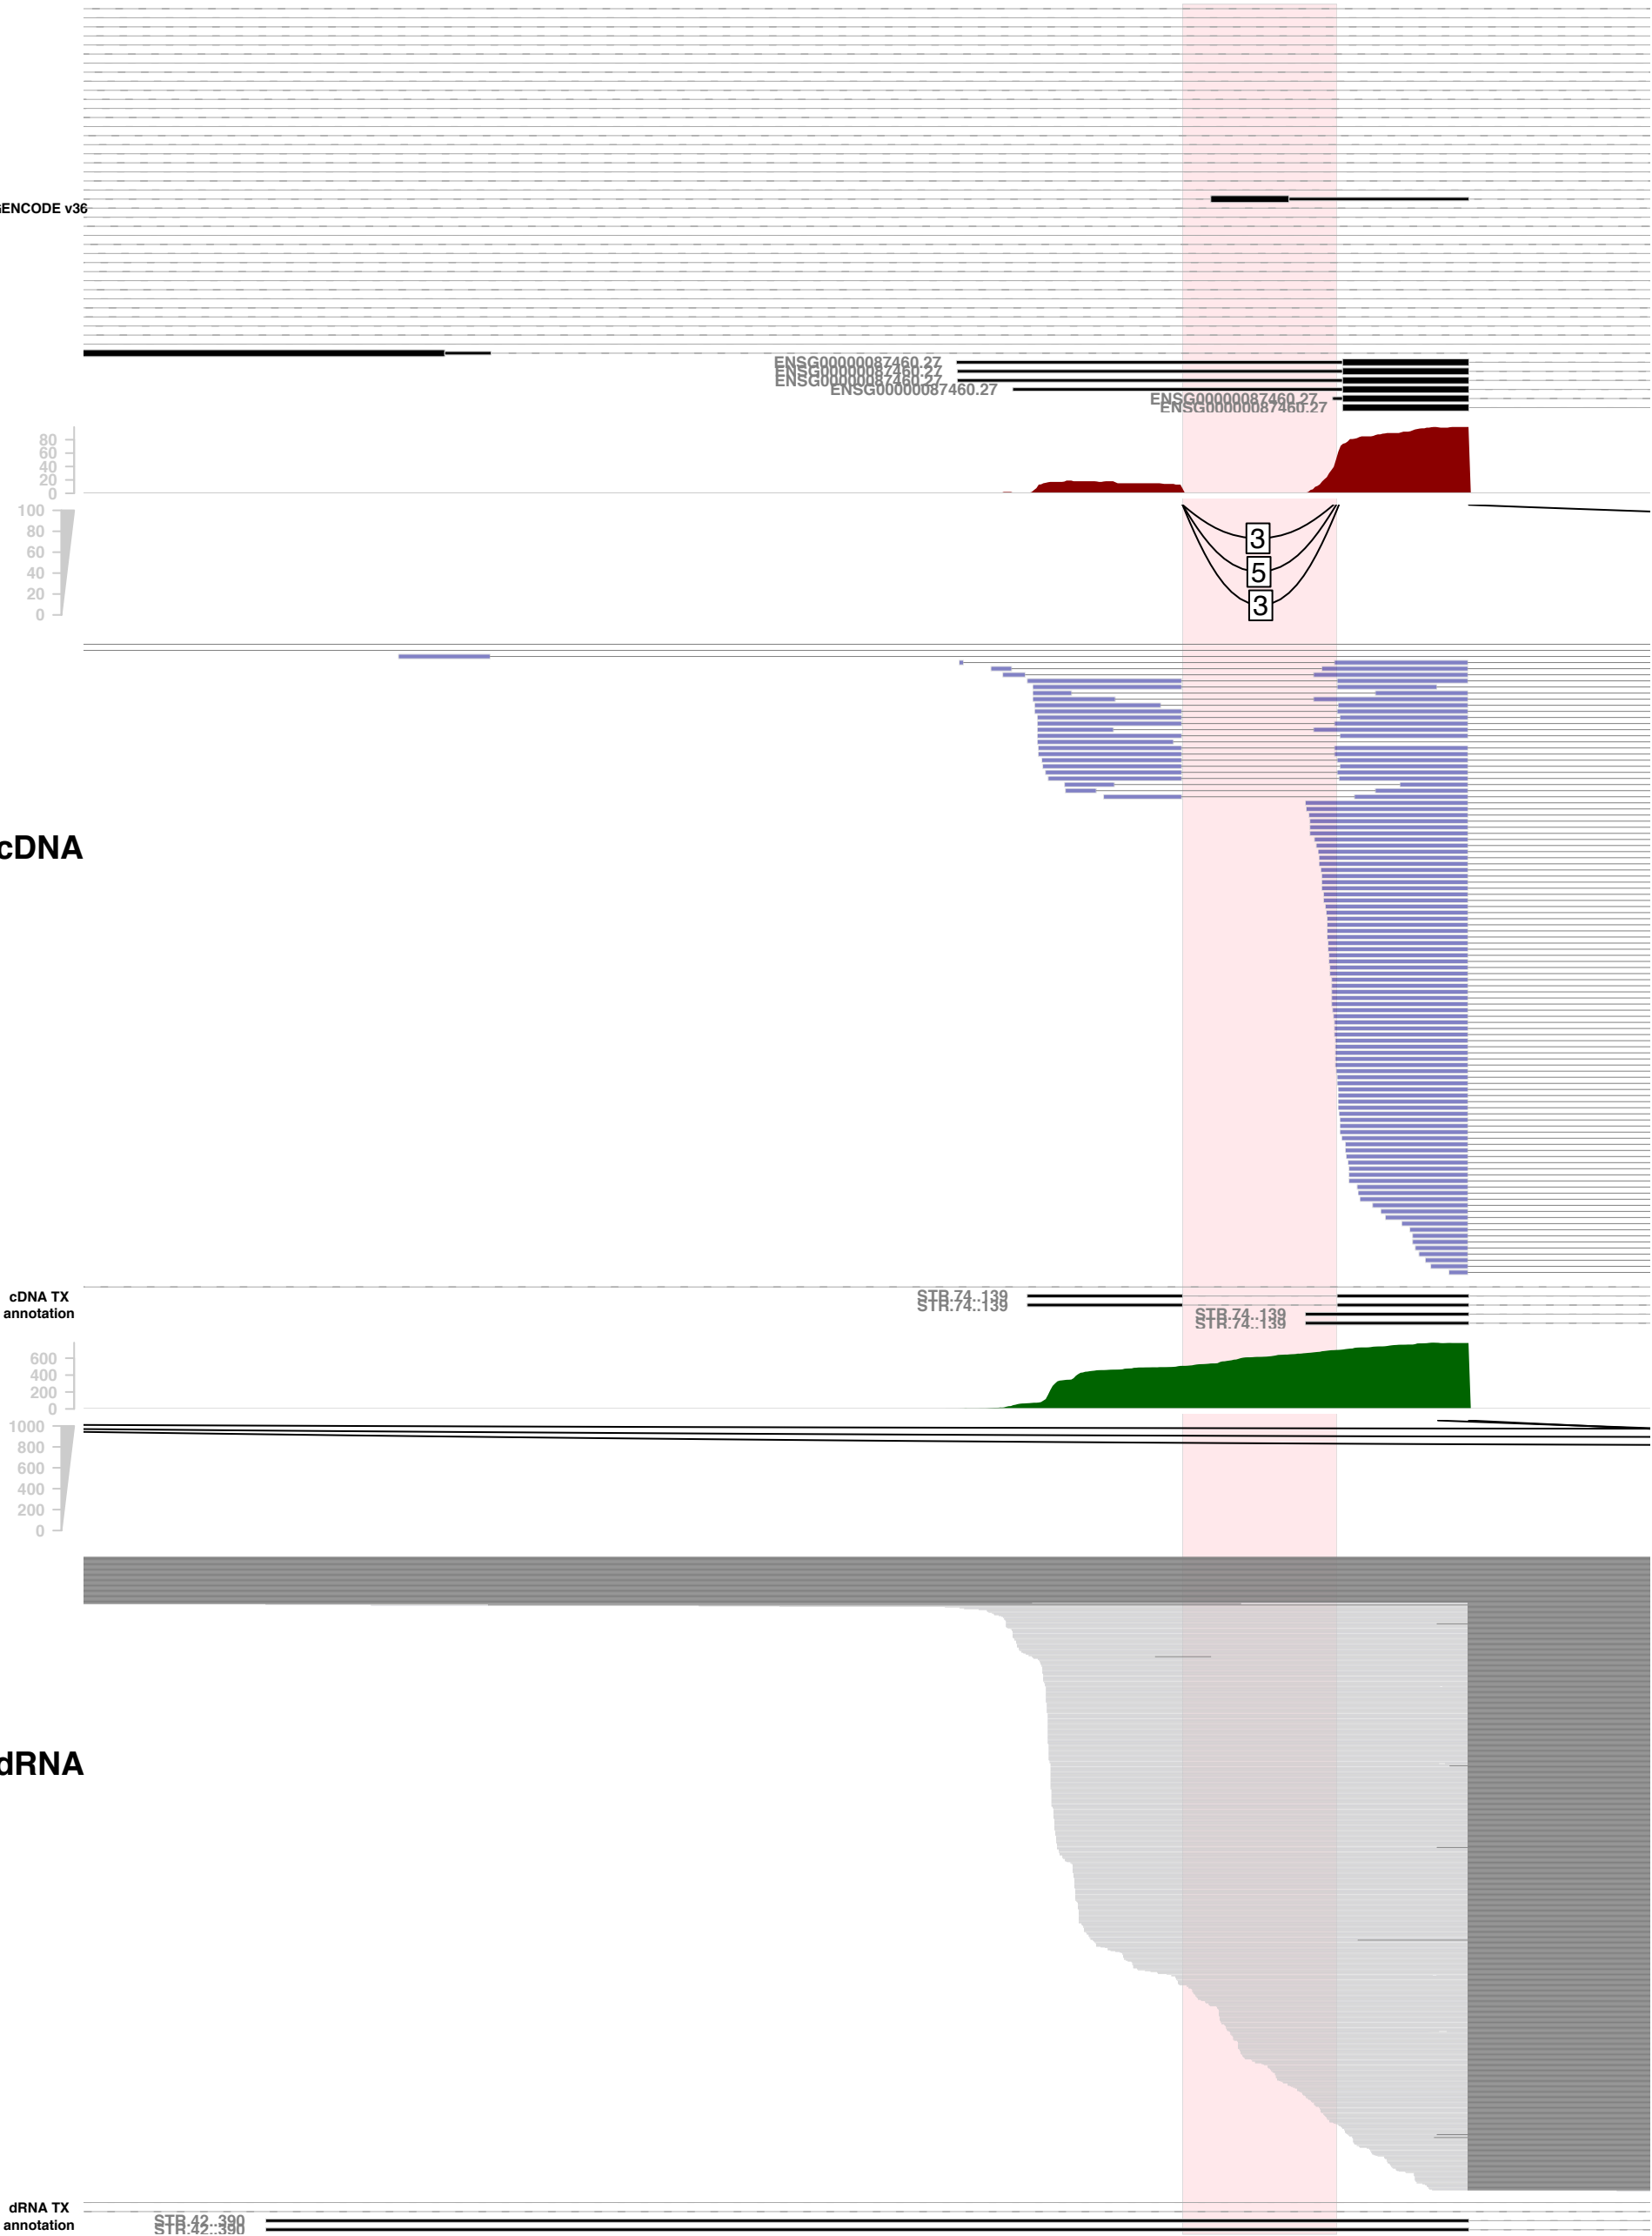

chr4:56459858-56460922:+ PAICS

Cell line: K562

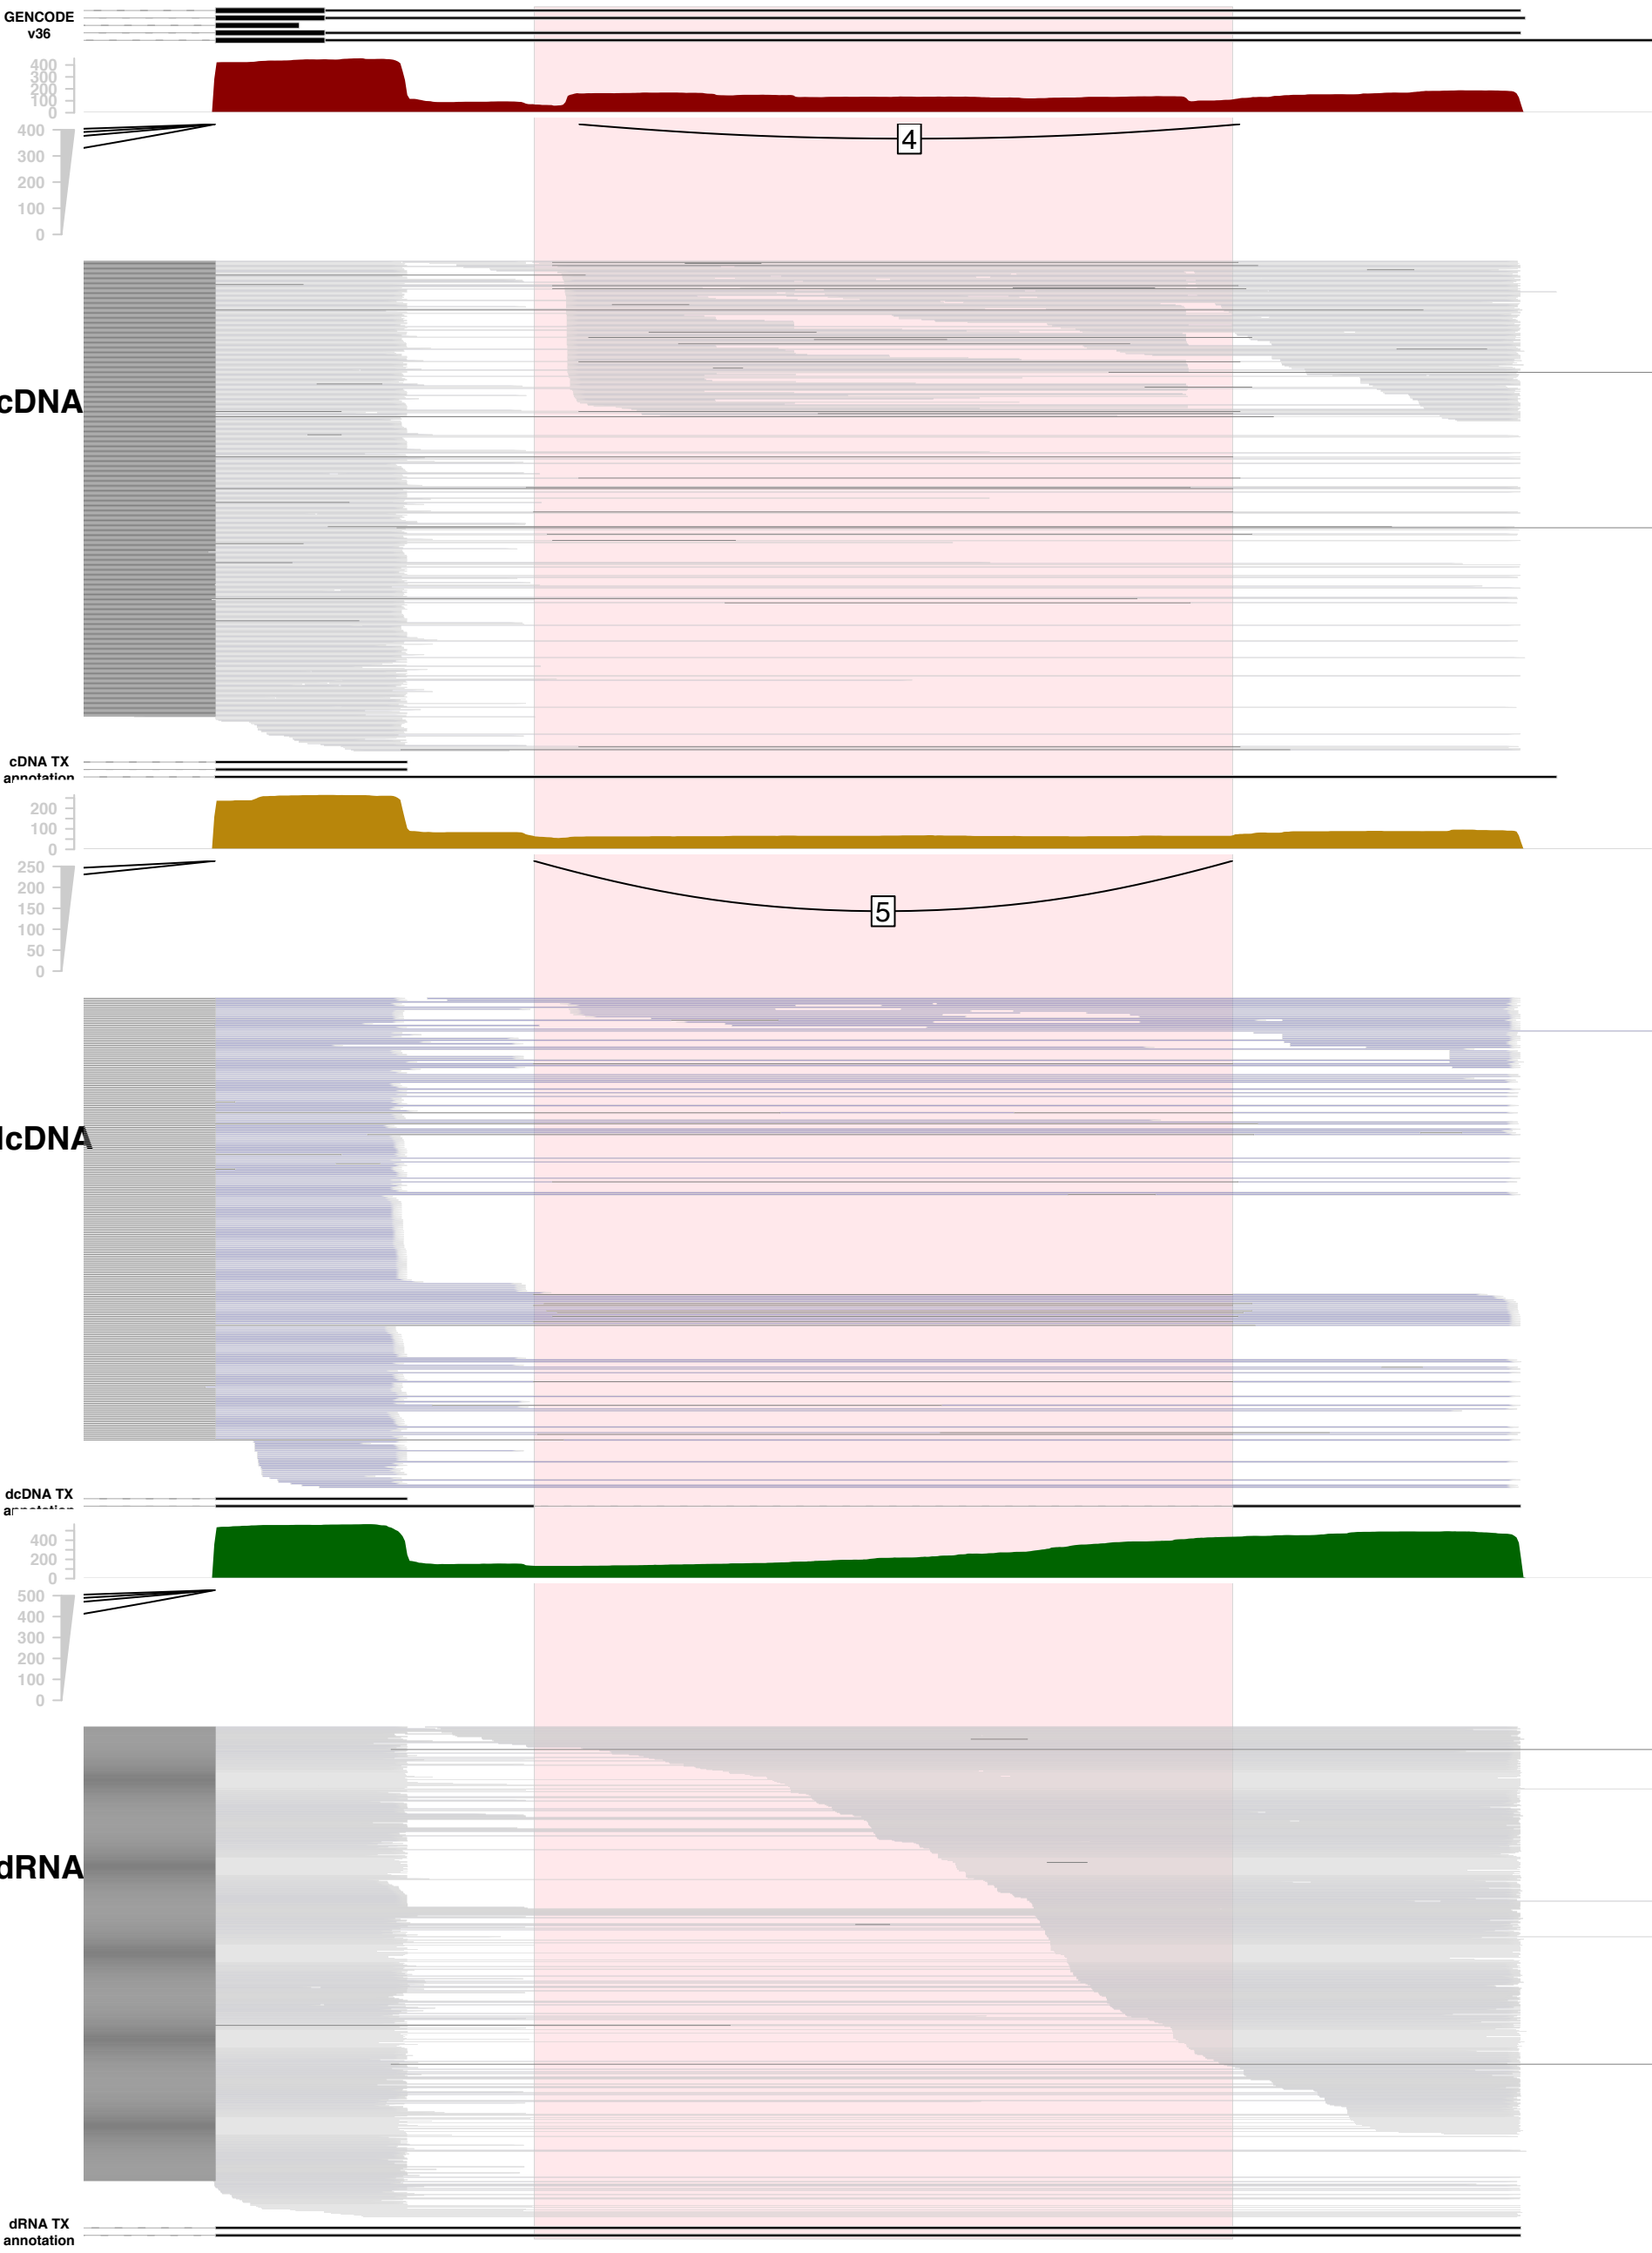

chr1:28334920-28335708:+ MED18

Cell line: MCF7

Direct repeat sequence: CAGCTA

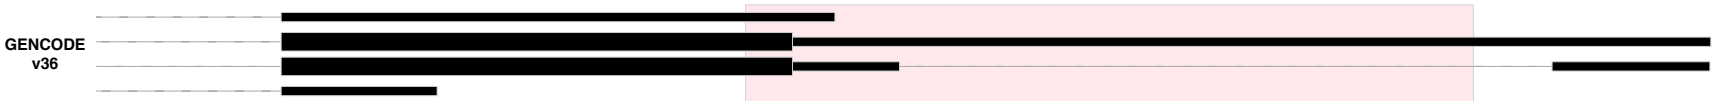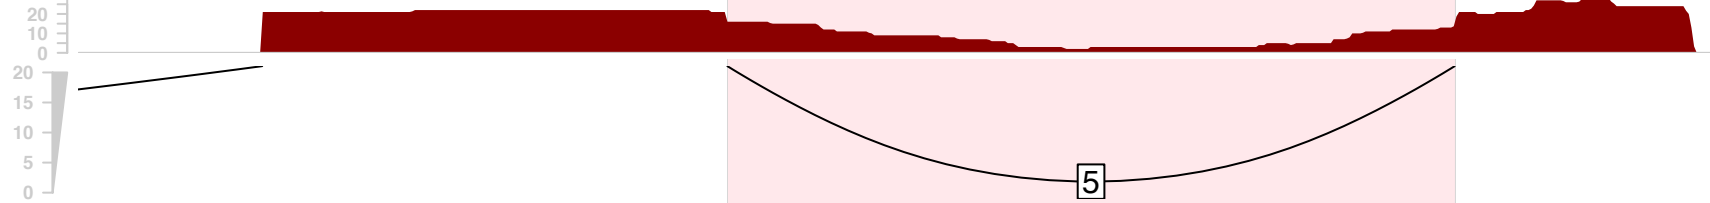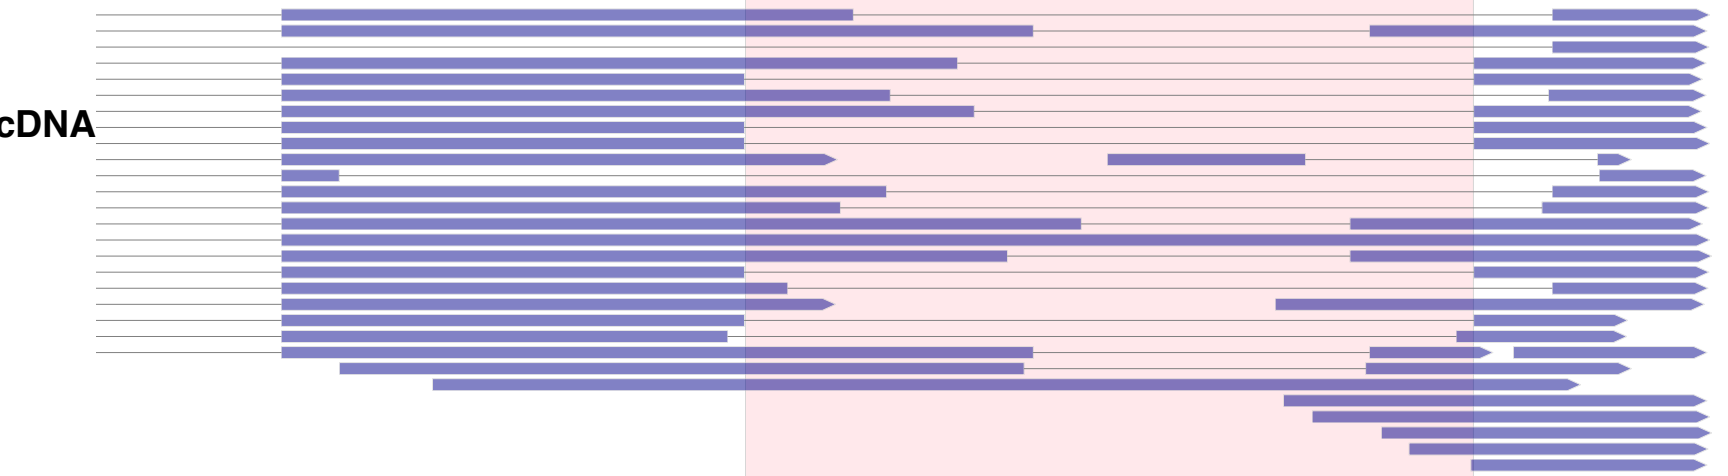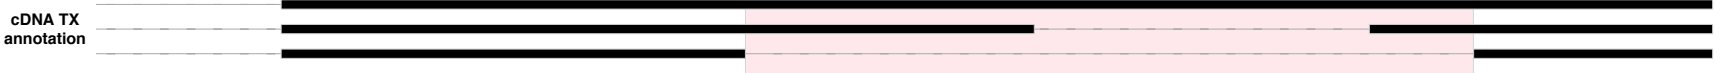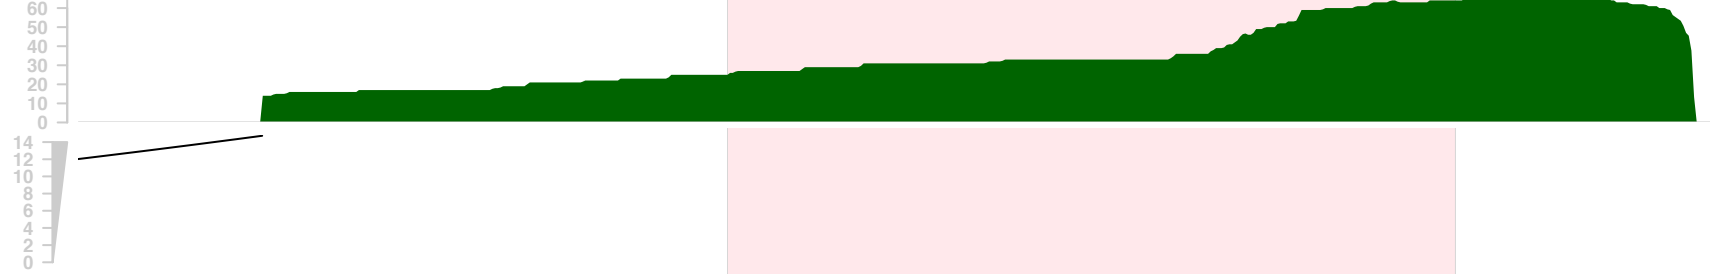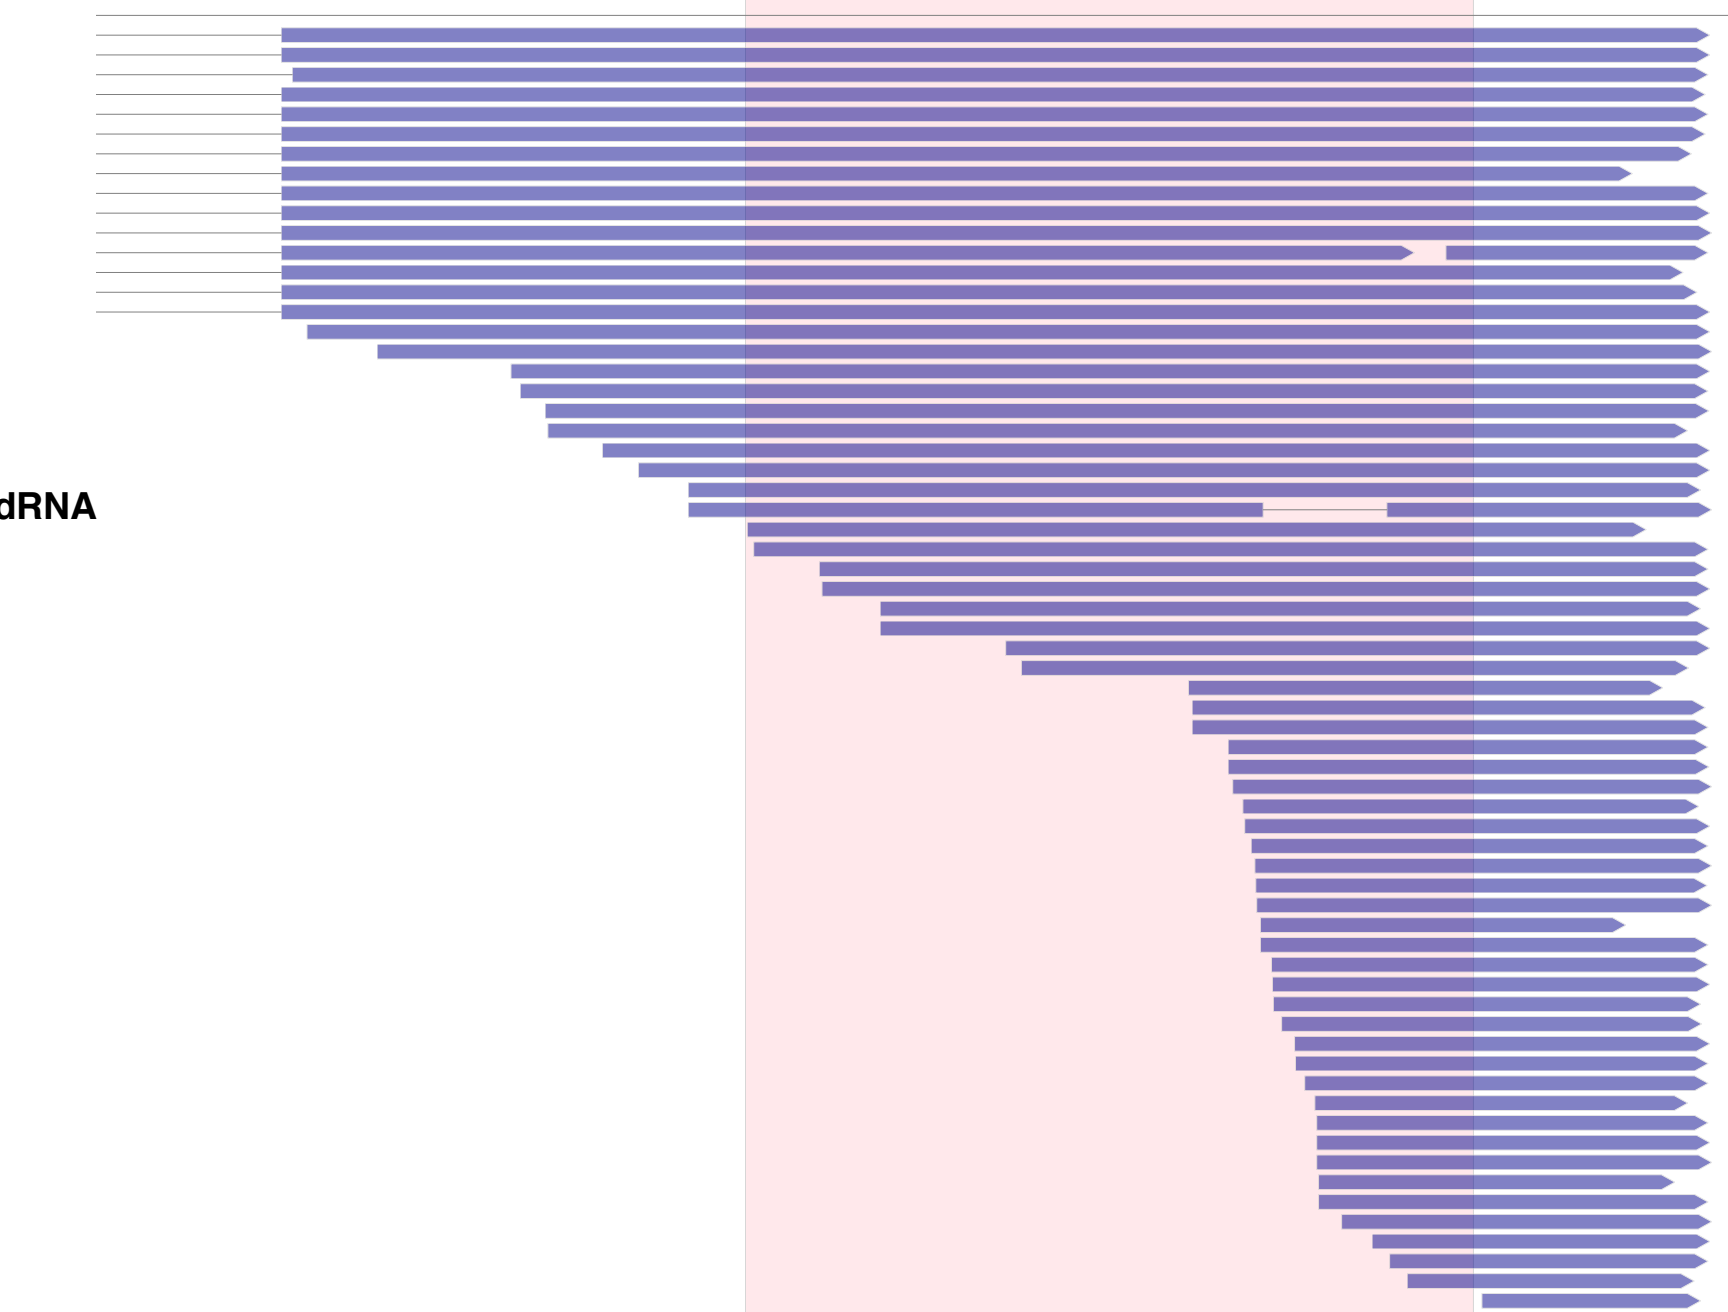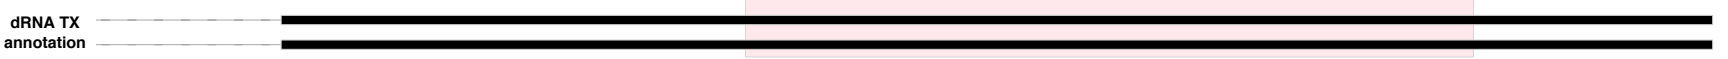



chr17:3663563-3663657:- TAX1BP3,P2RX5-TAX1BP3

Cell line: MCF7

Direct repeat sequence: GACCG

GENCODE v36  
ENSG00000213977.8  
ENSG00000213977.8  
ENSG00000257950.3

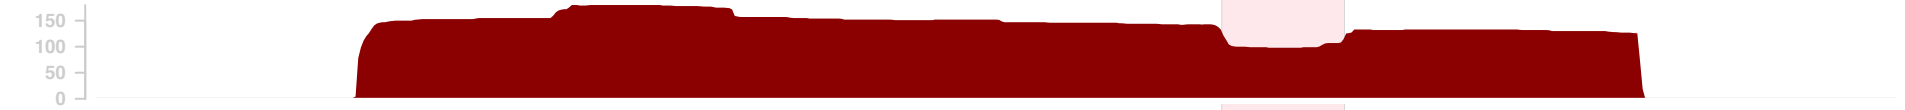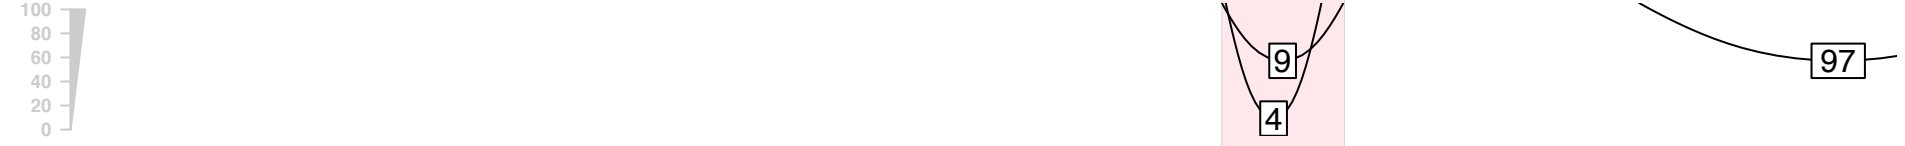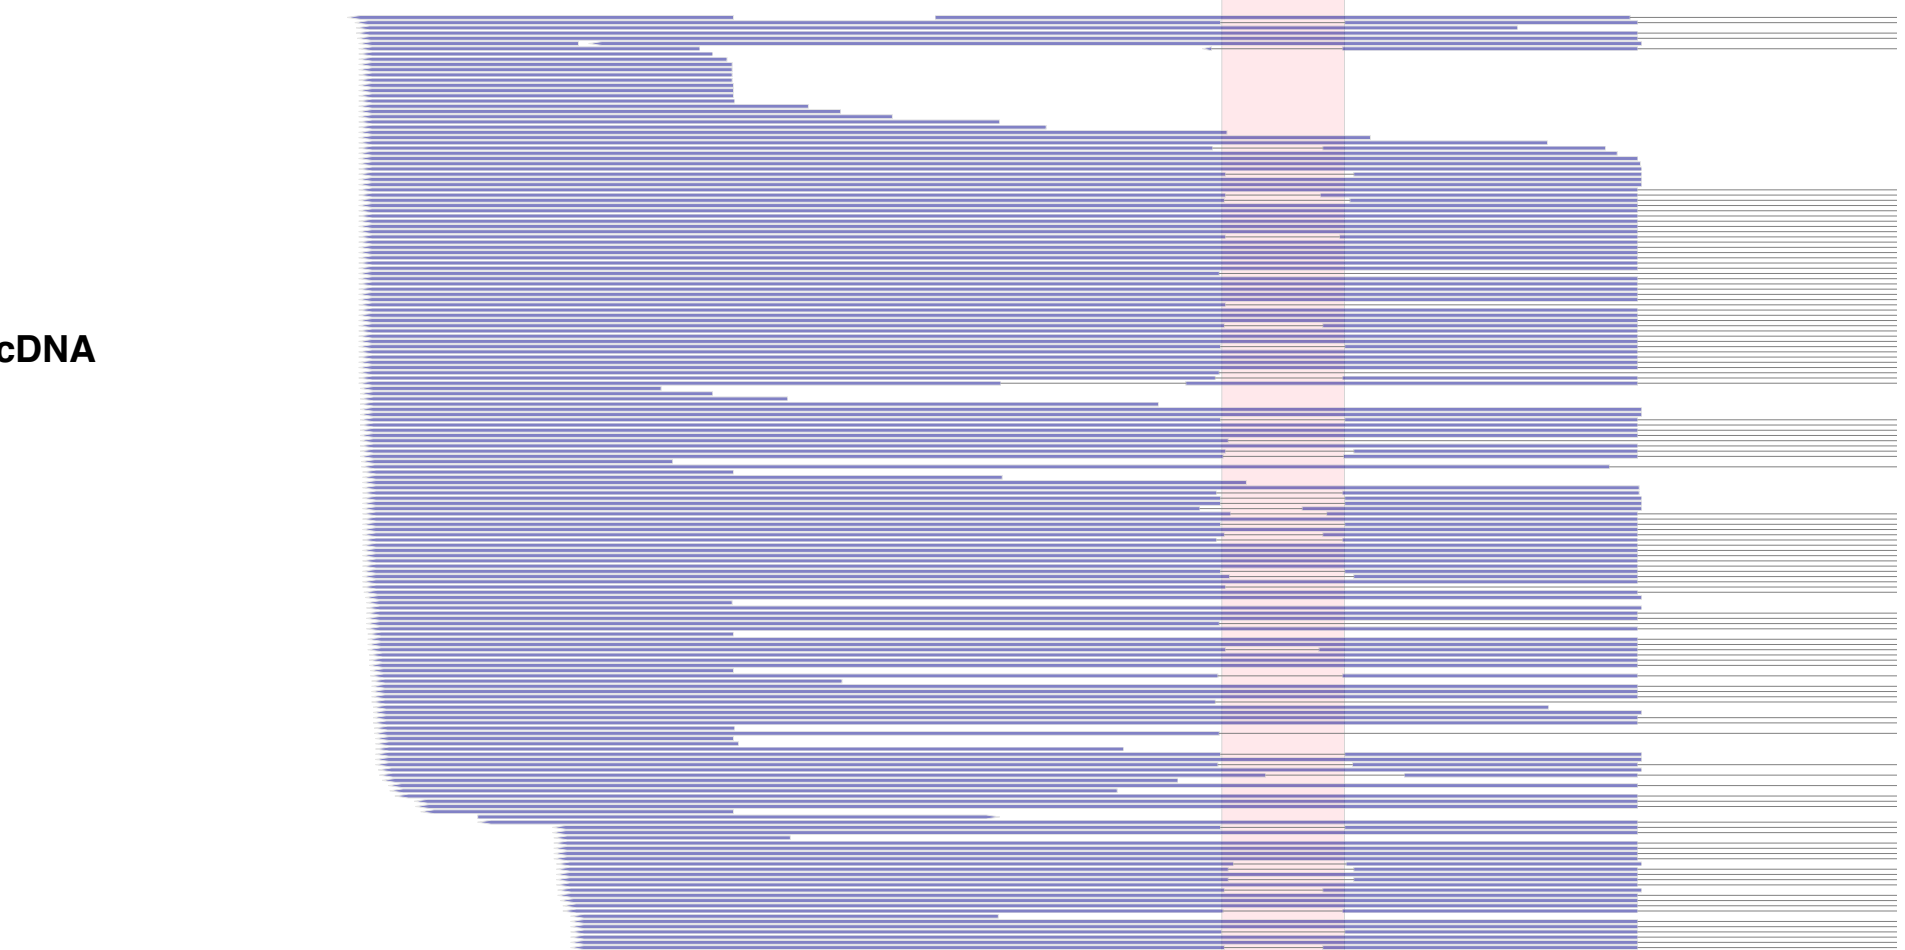

cDNA TX annotation  
STR.32..975  
STR.32..975

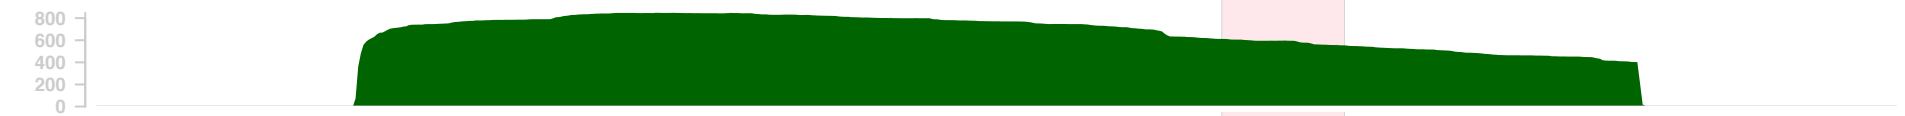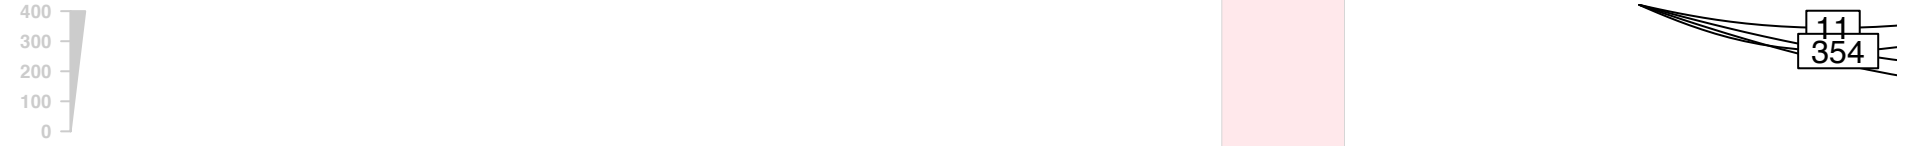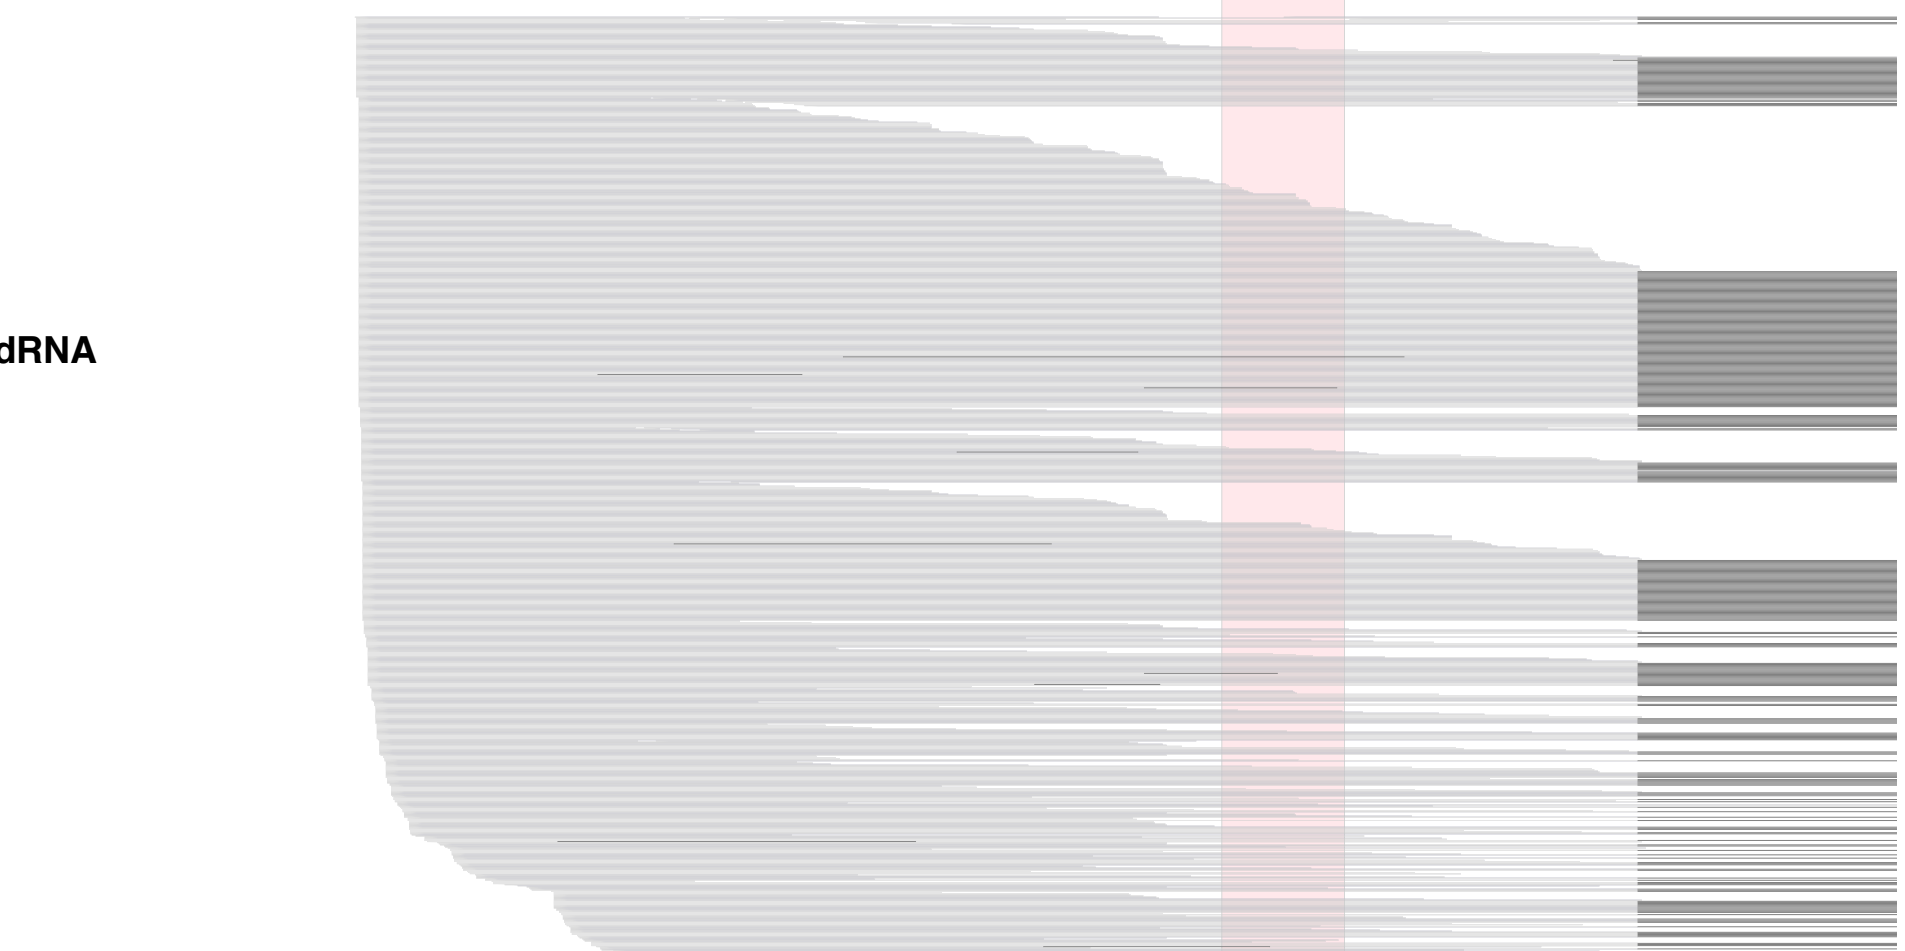

dRNA TX annotation  
STR.56..132

chr19:35746759-35746910:+ PSENEN,AC002398.9

Cell line: MCF7

Direct repeat sequence: CCTG

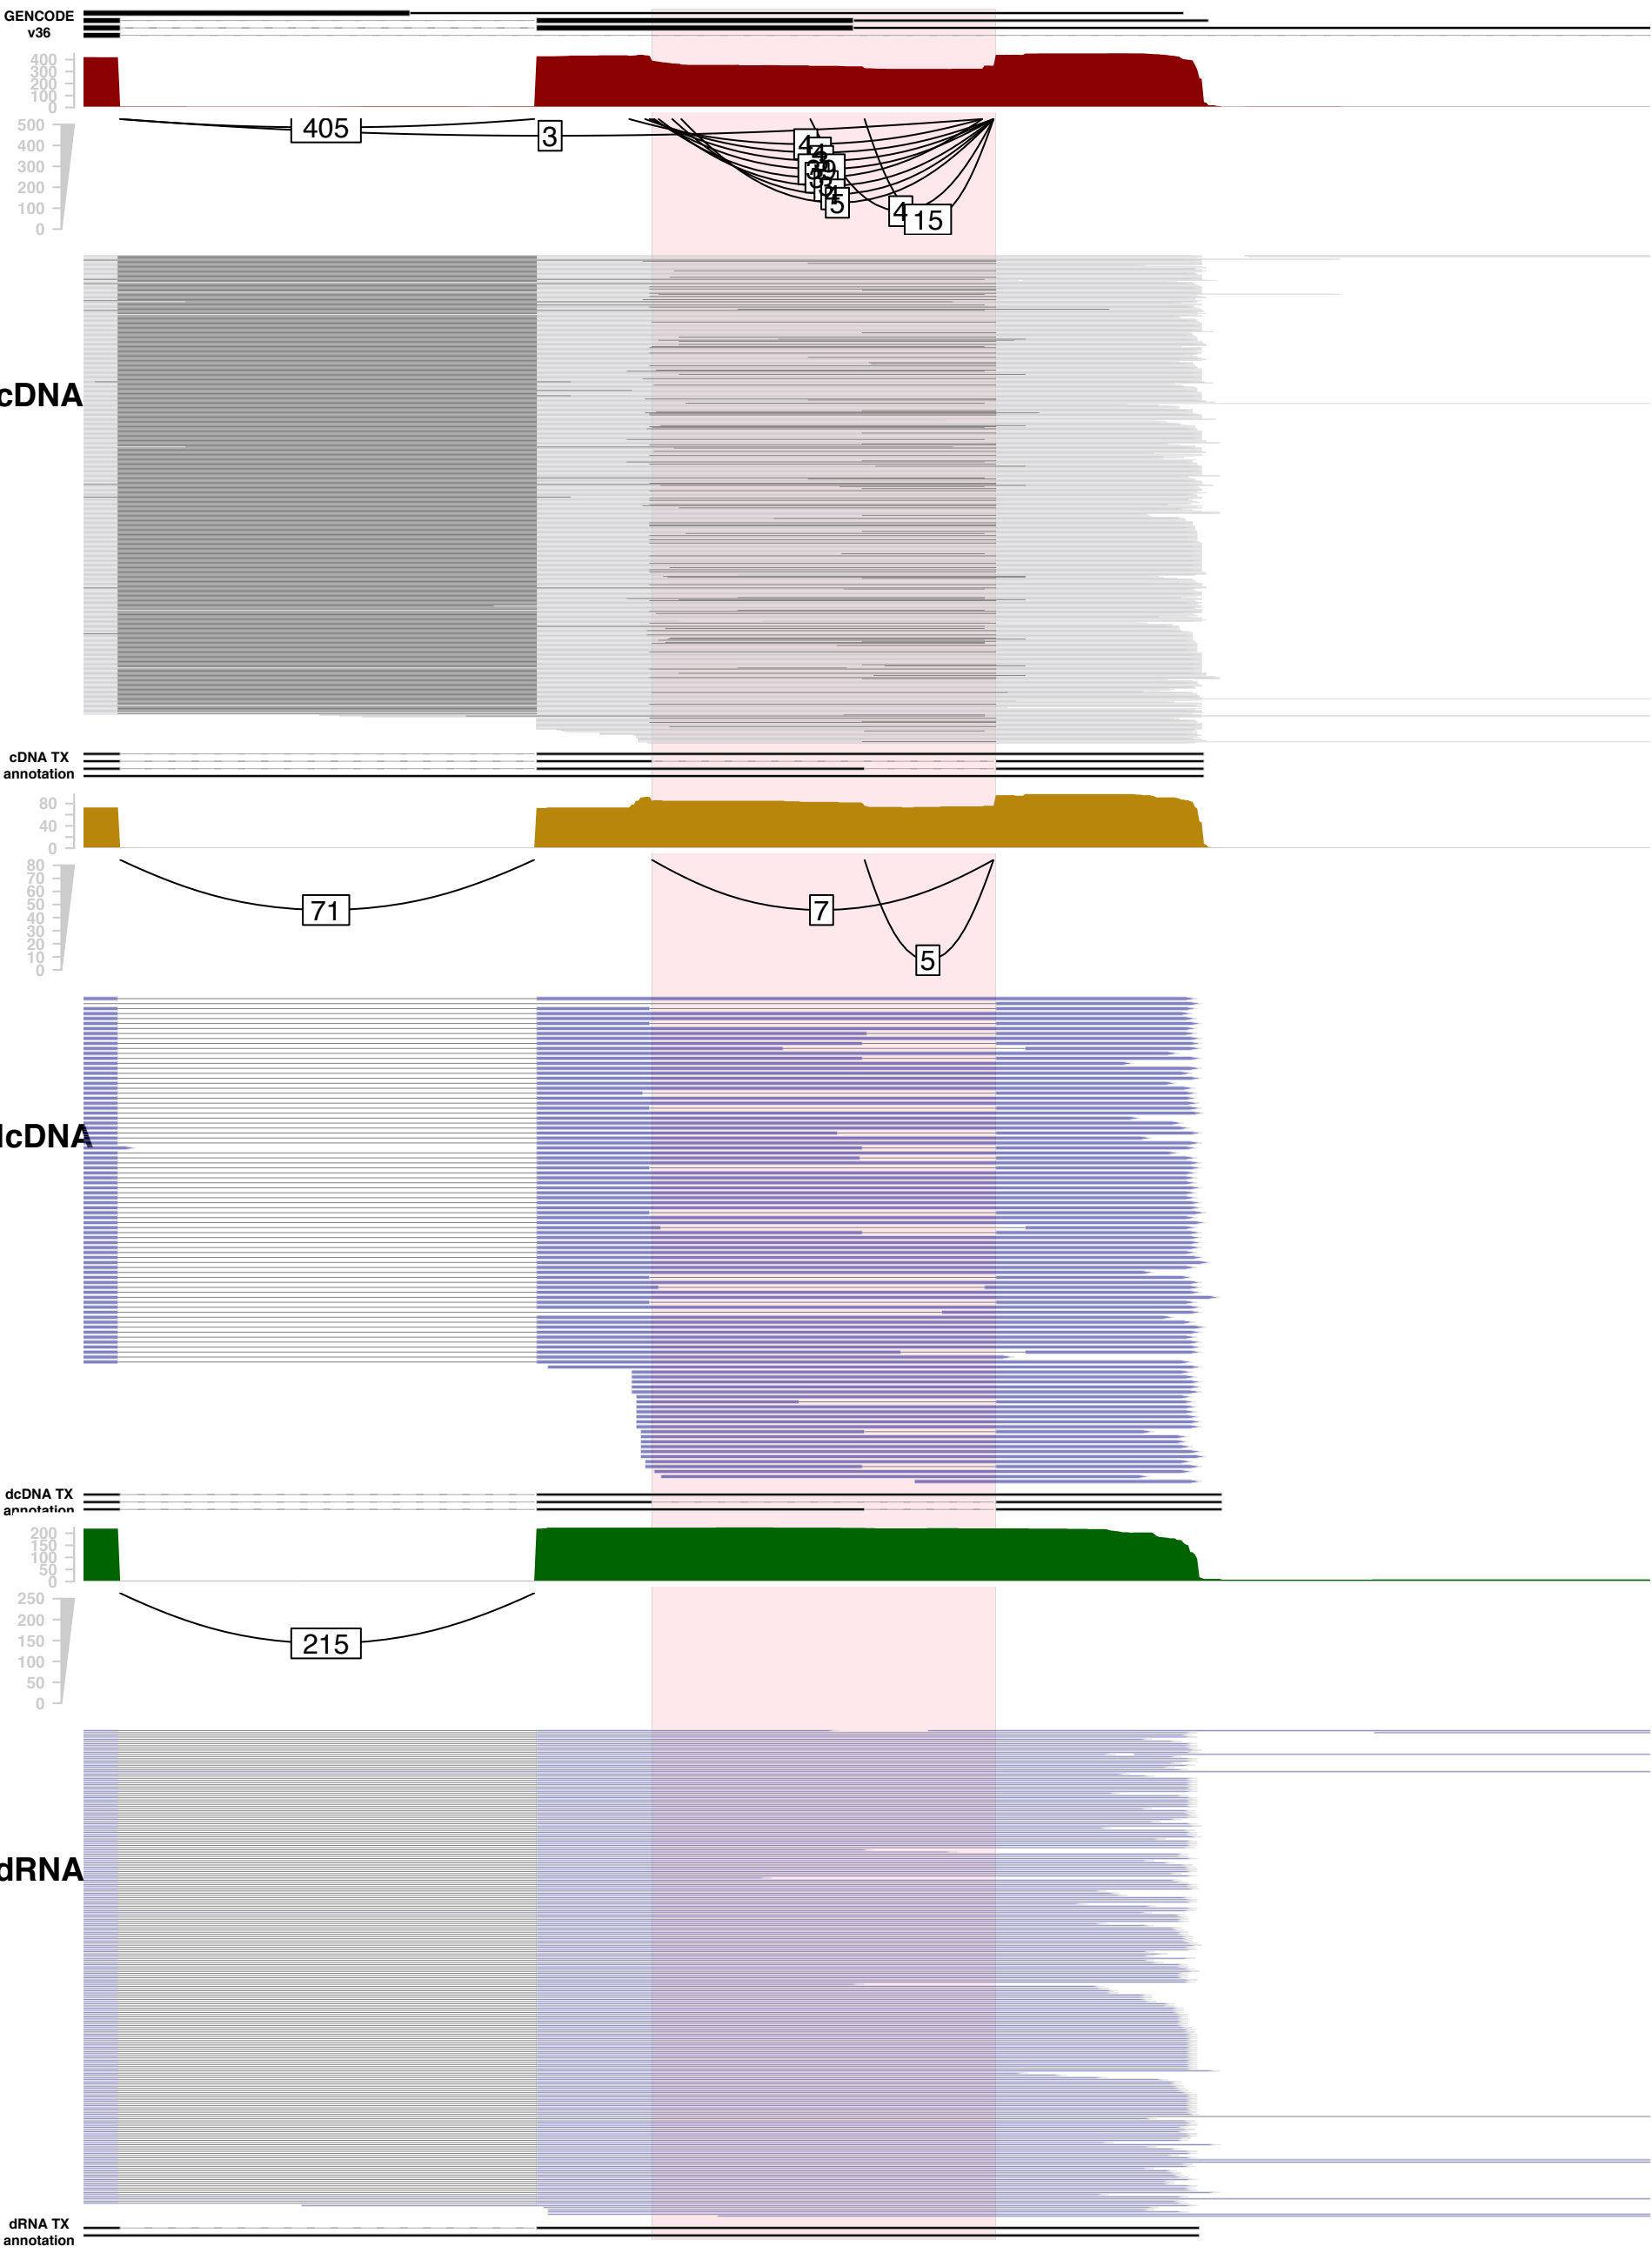

chr19:35746853-35746910:+ PSENEN,AC002398.9

Cell line: MCF7

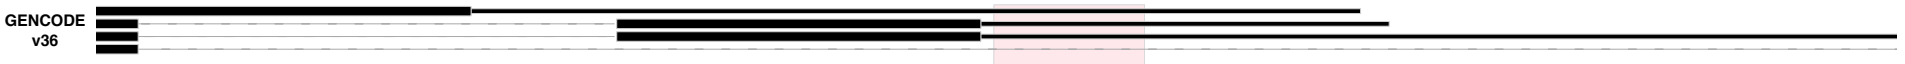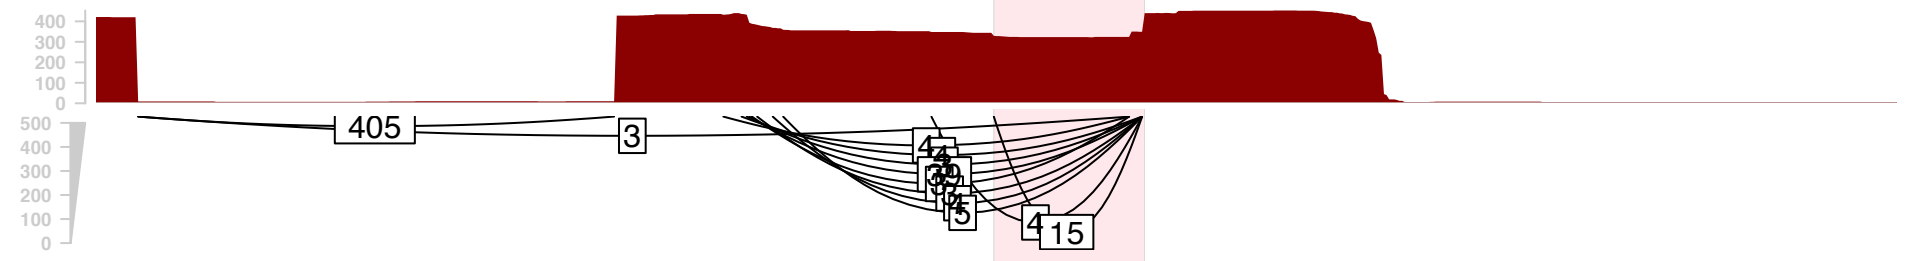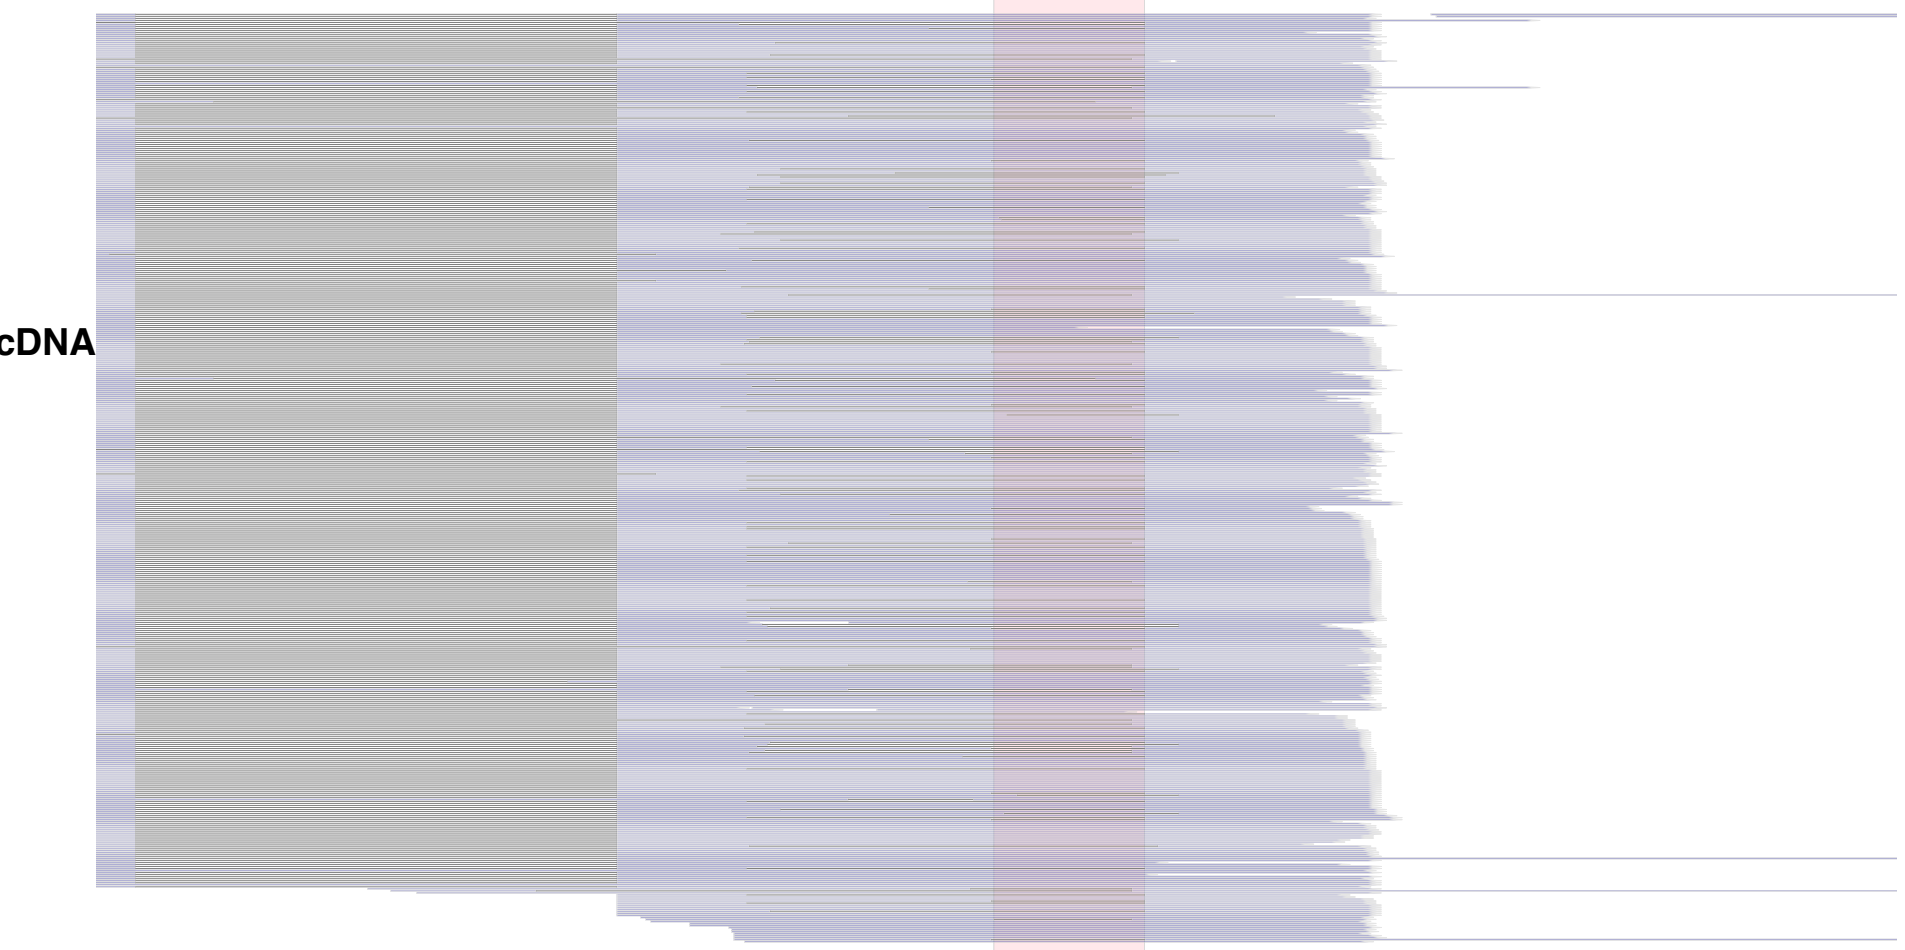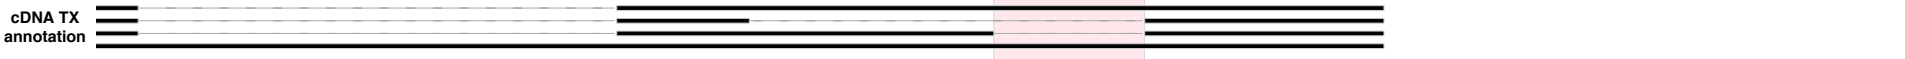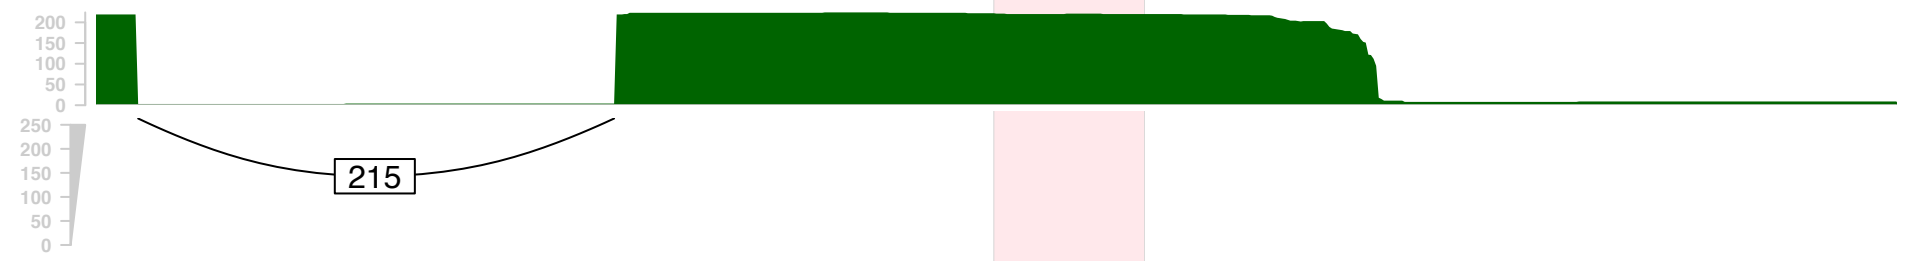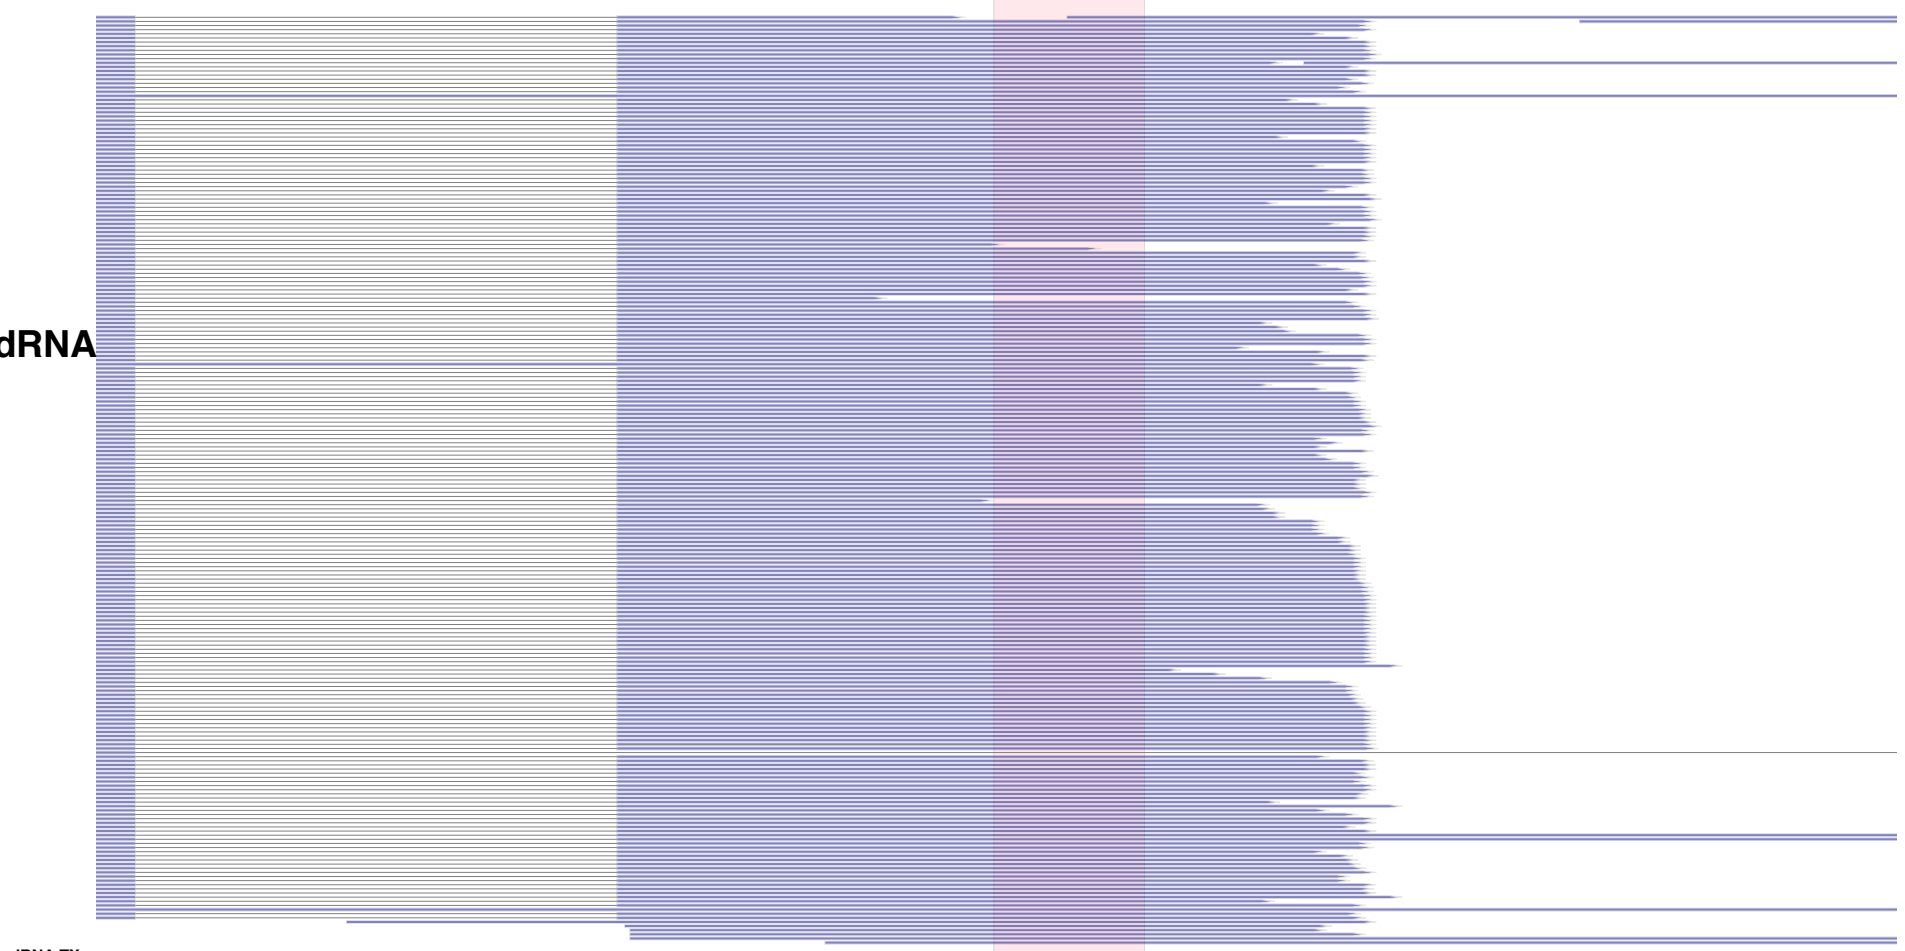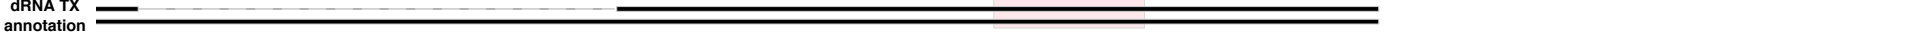

chr20:58891551-58891723:+ GNAS

Cell line: MCF7

Direct repeat sequence: CCGCC

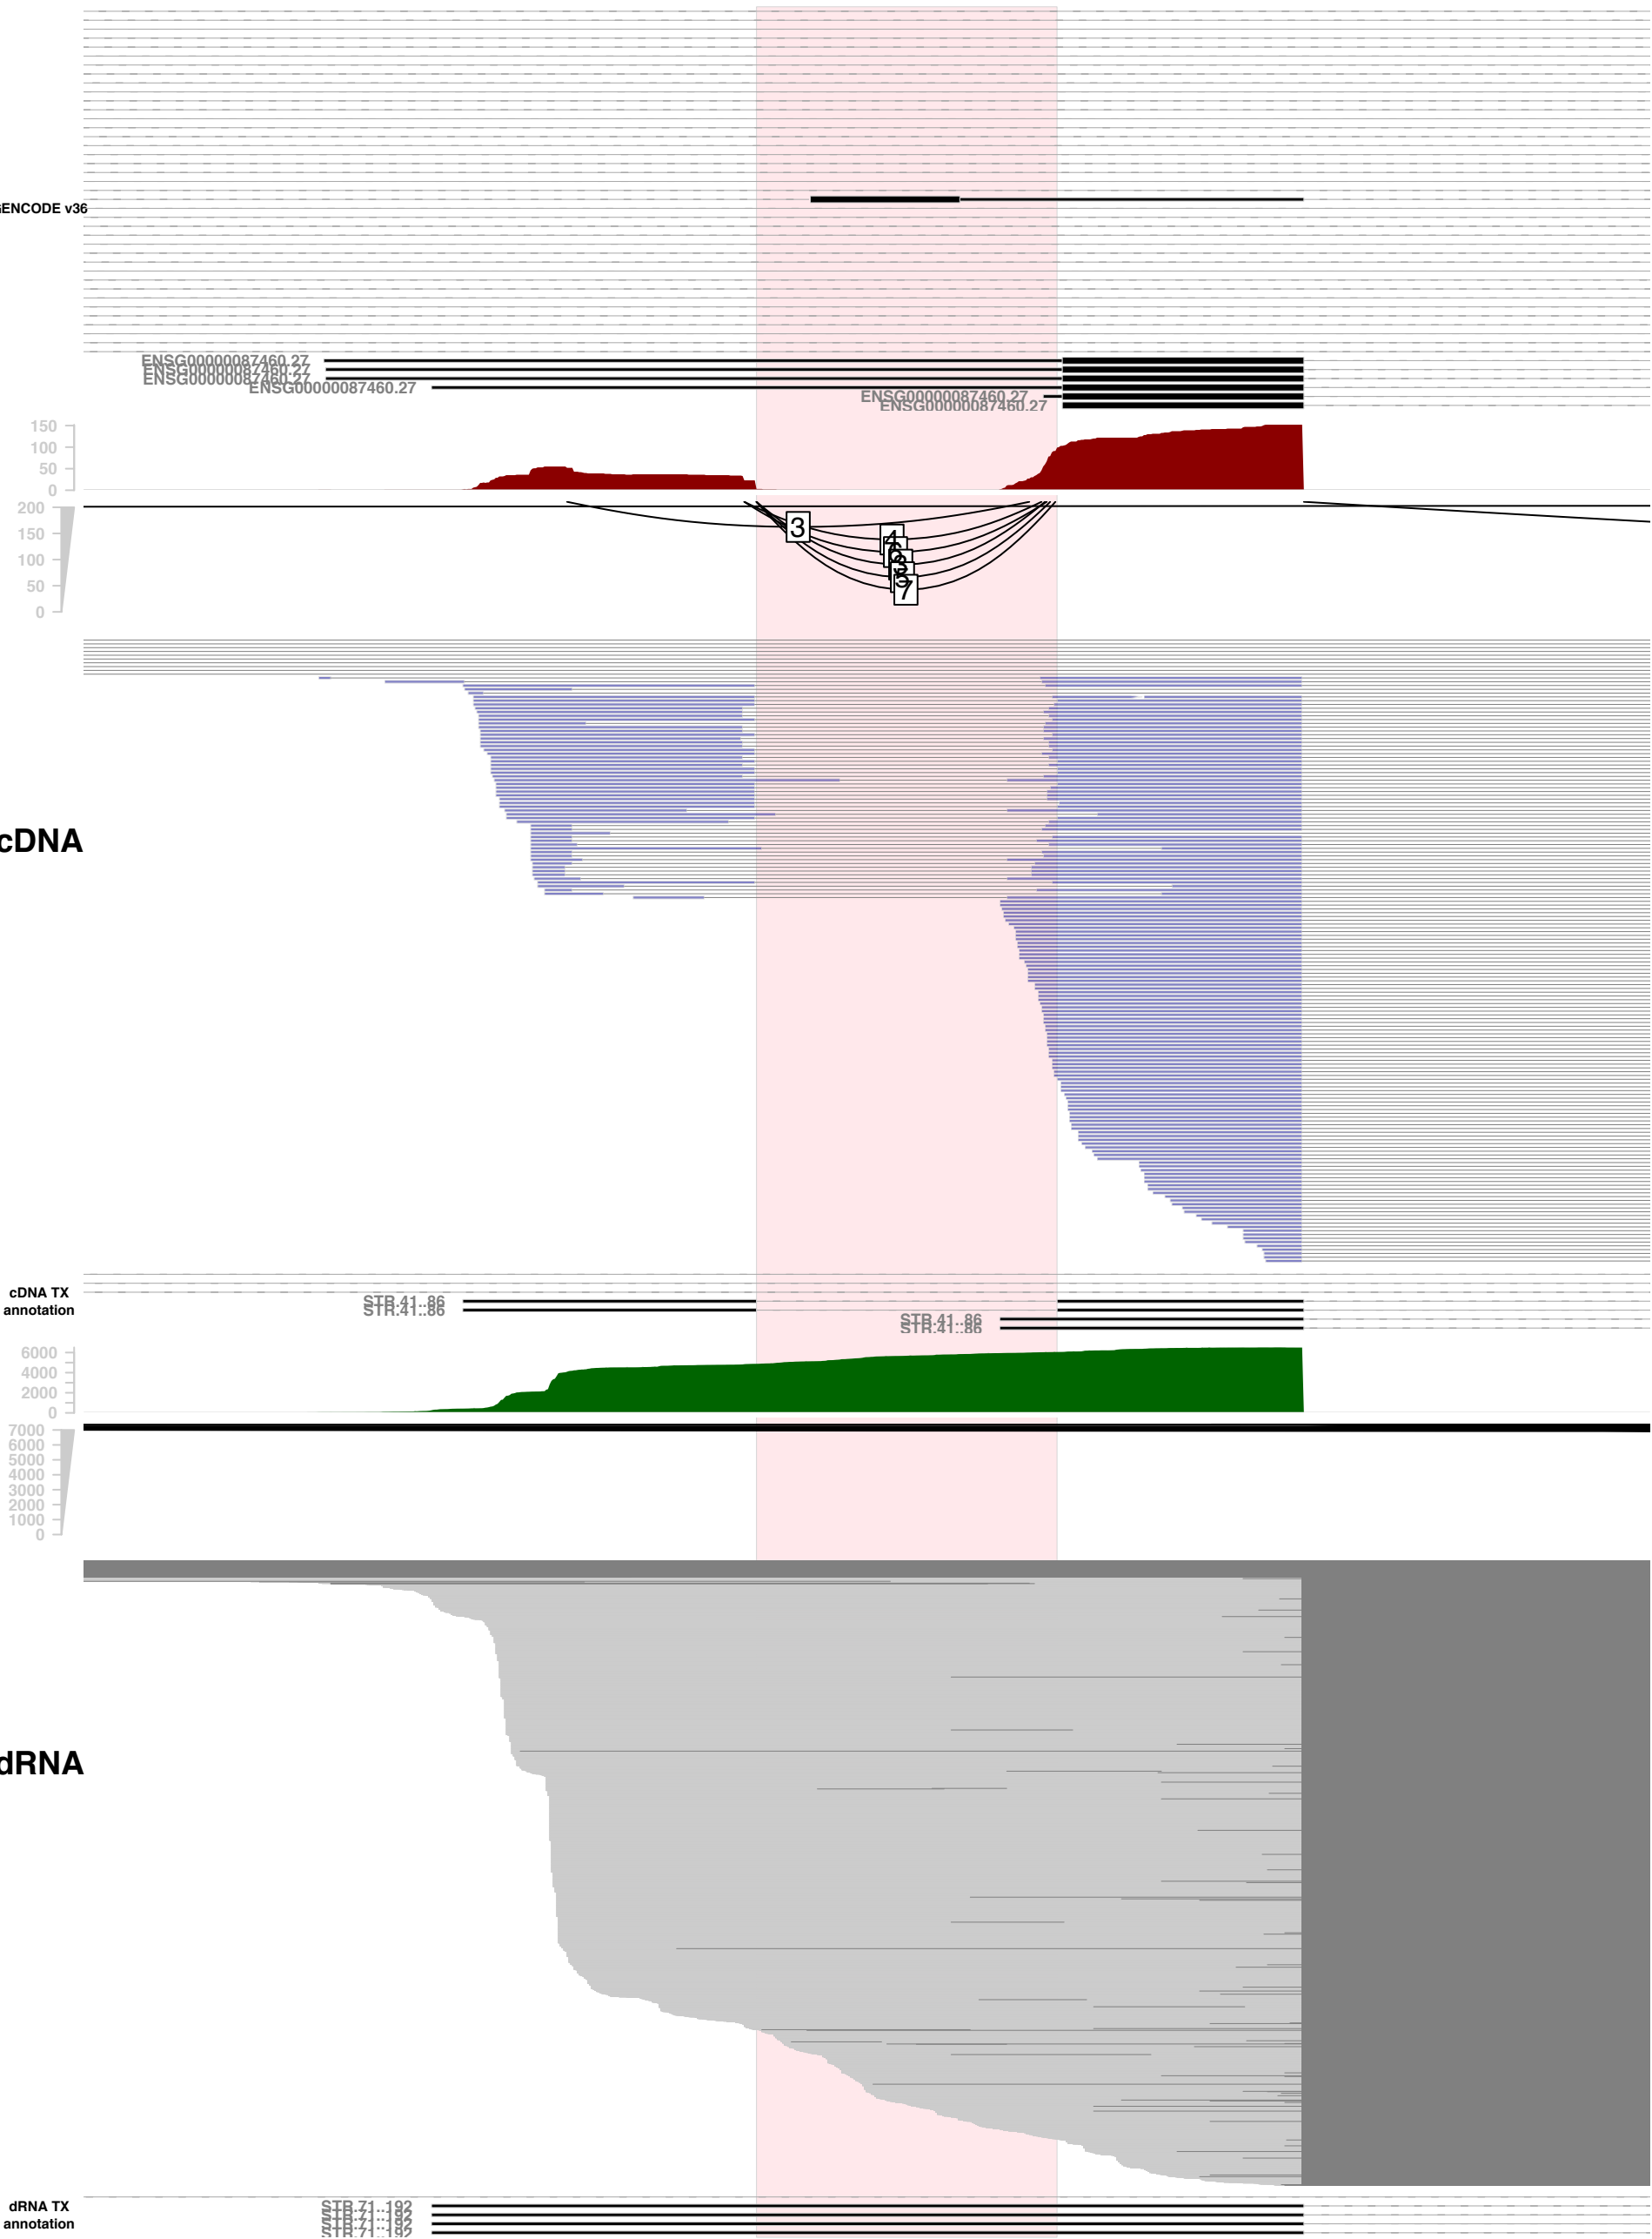

chr22:37807089-37807354:+ H1FO

Cell line: MCF7

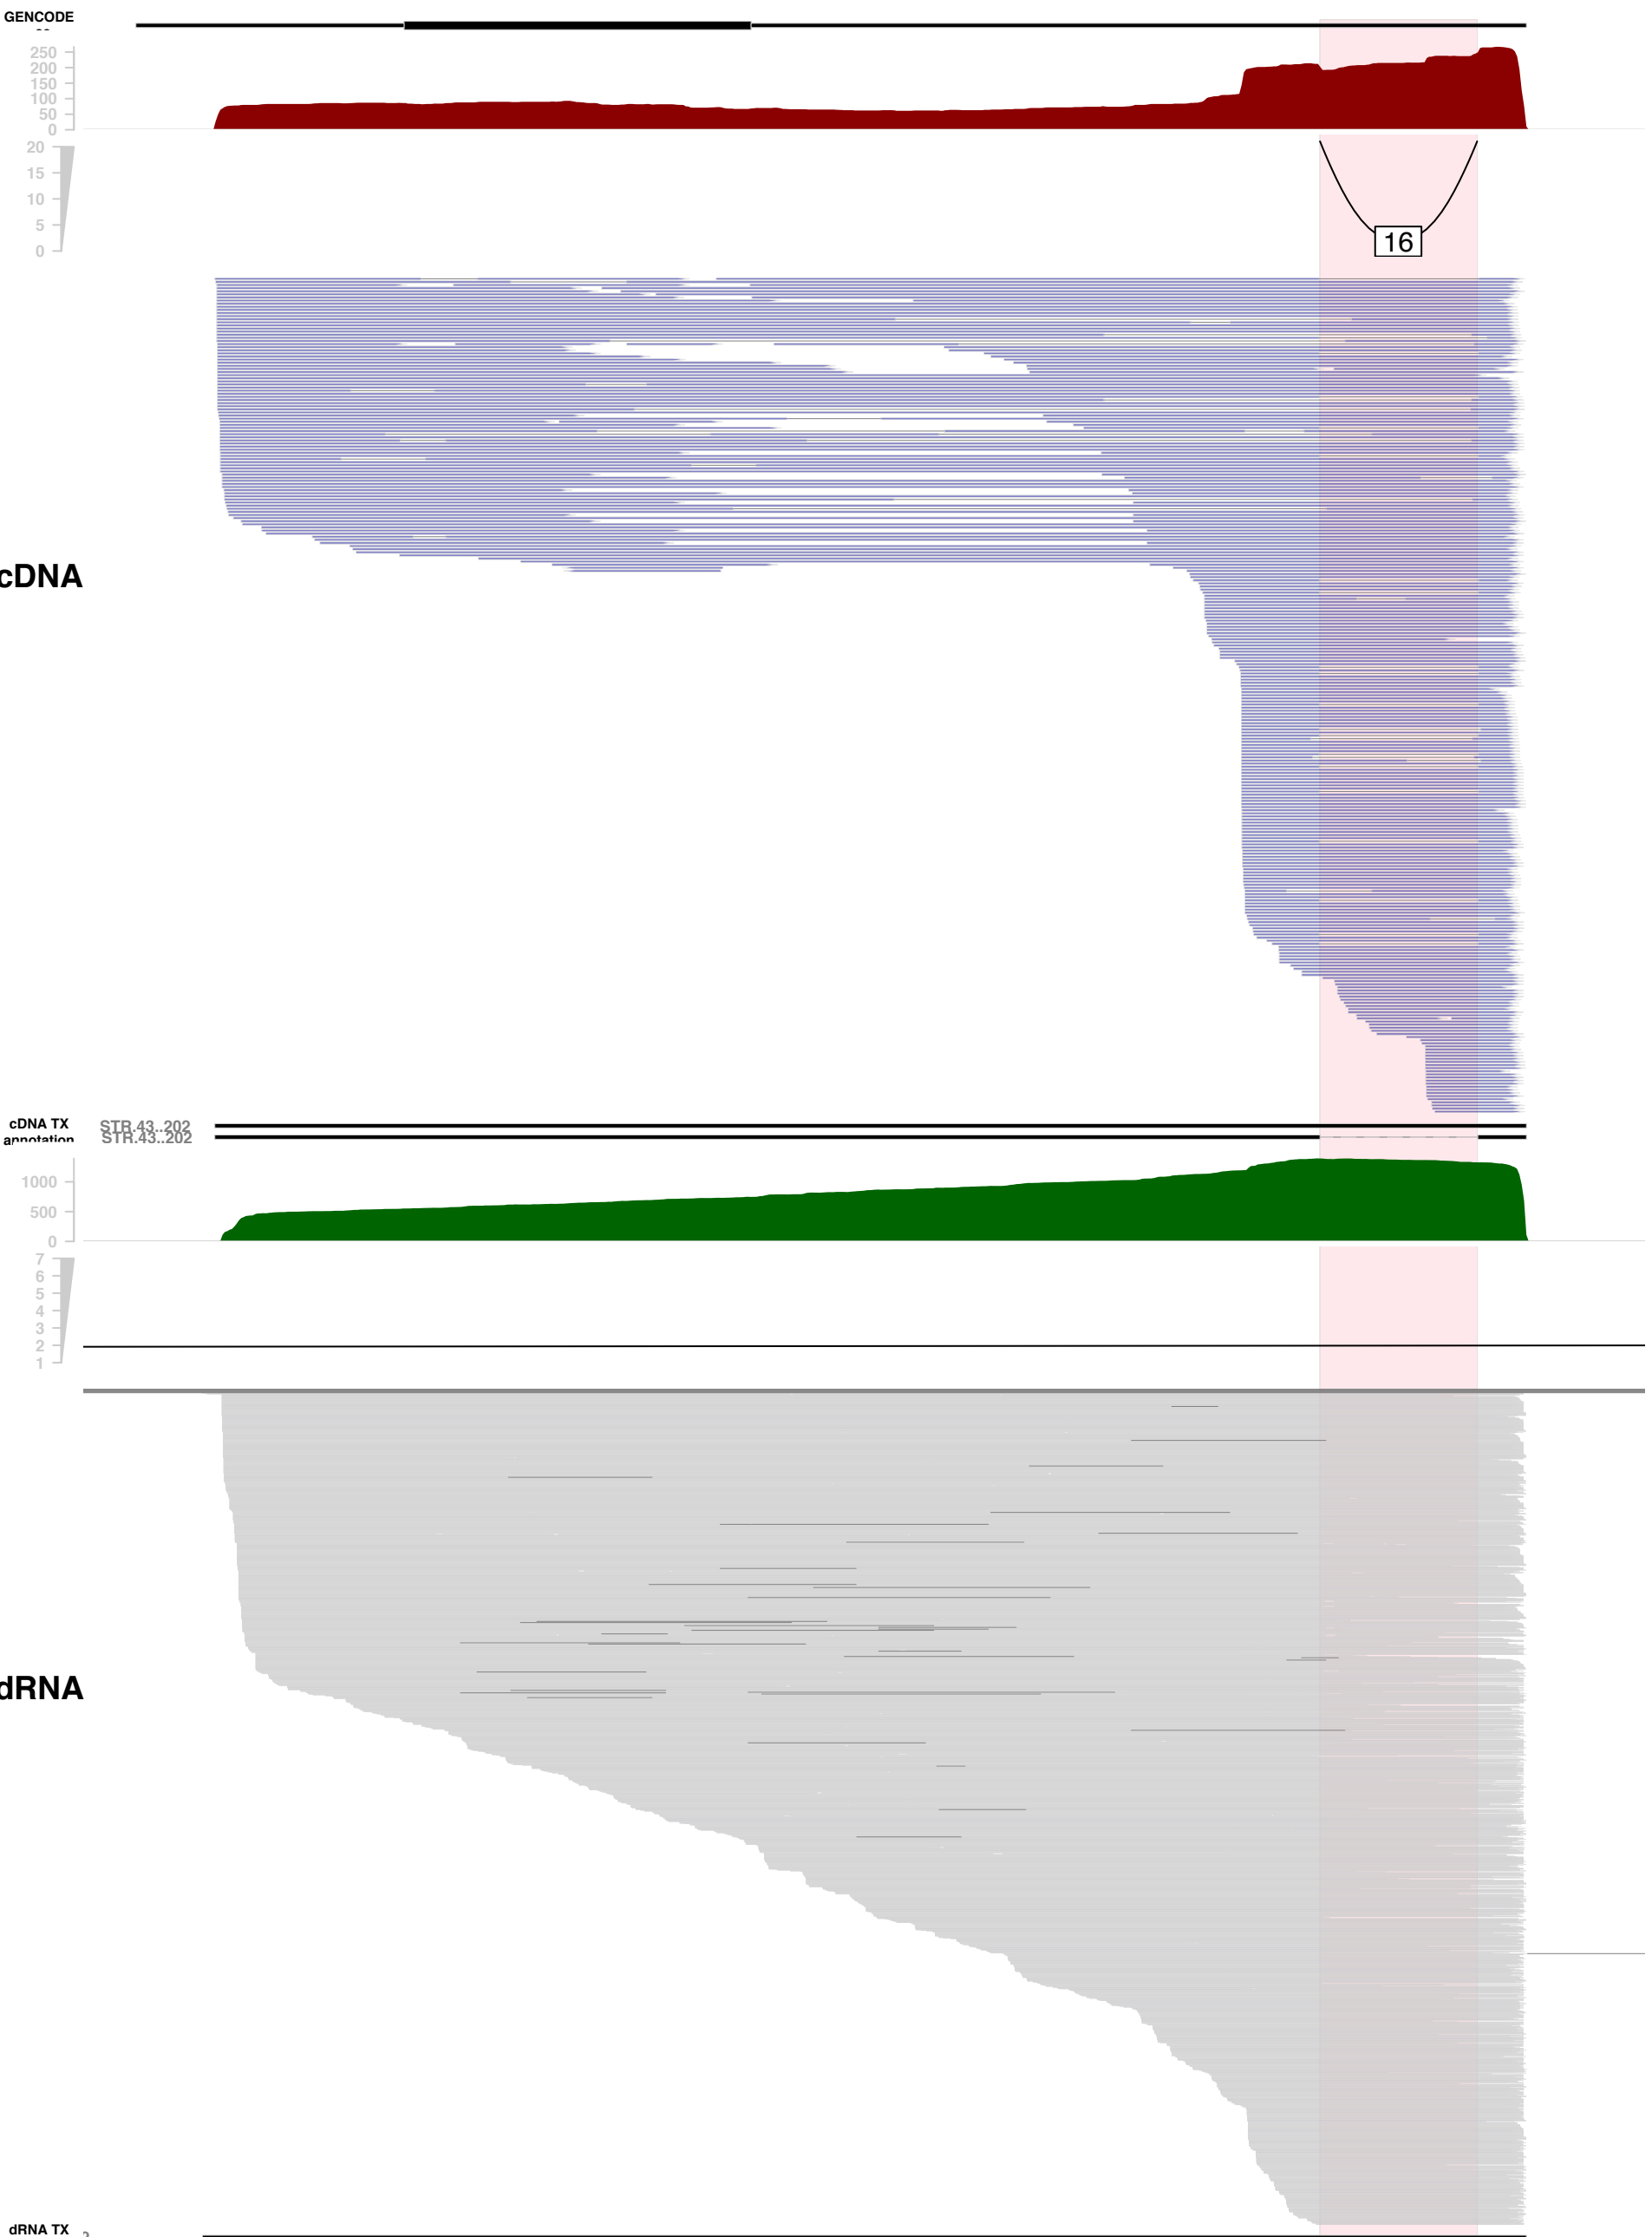

chr5:163437659-163437758:+ CCNG1

Cell line: MCF7

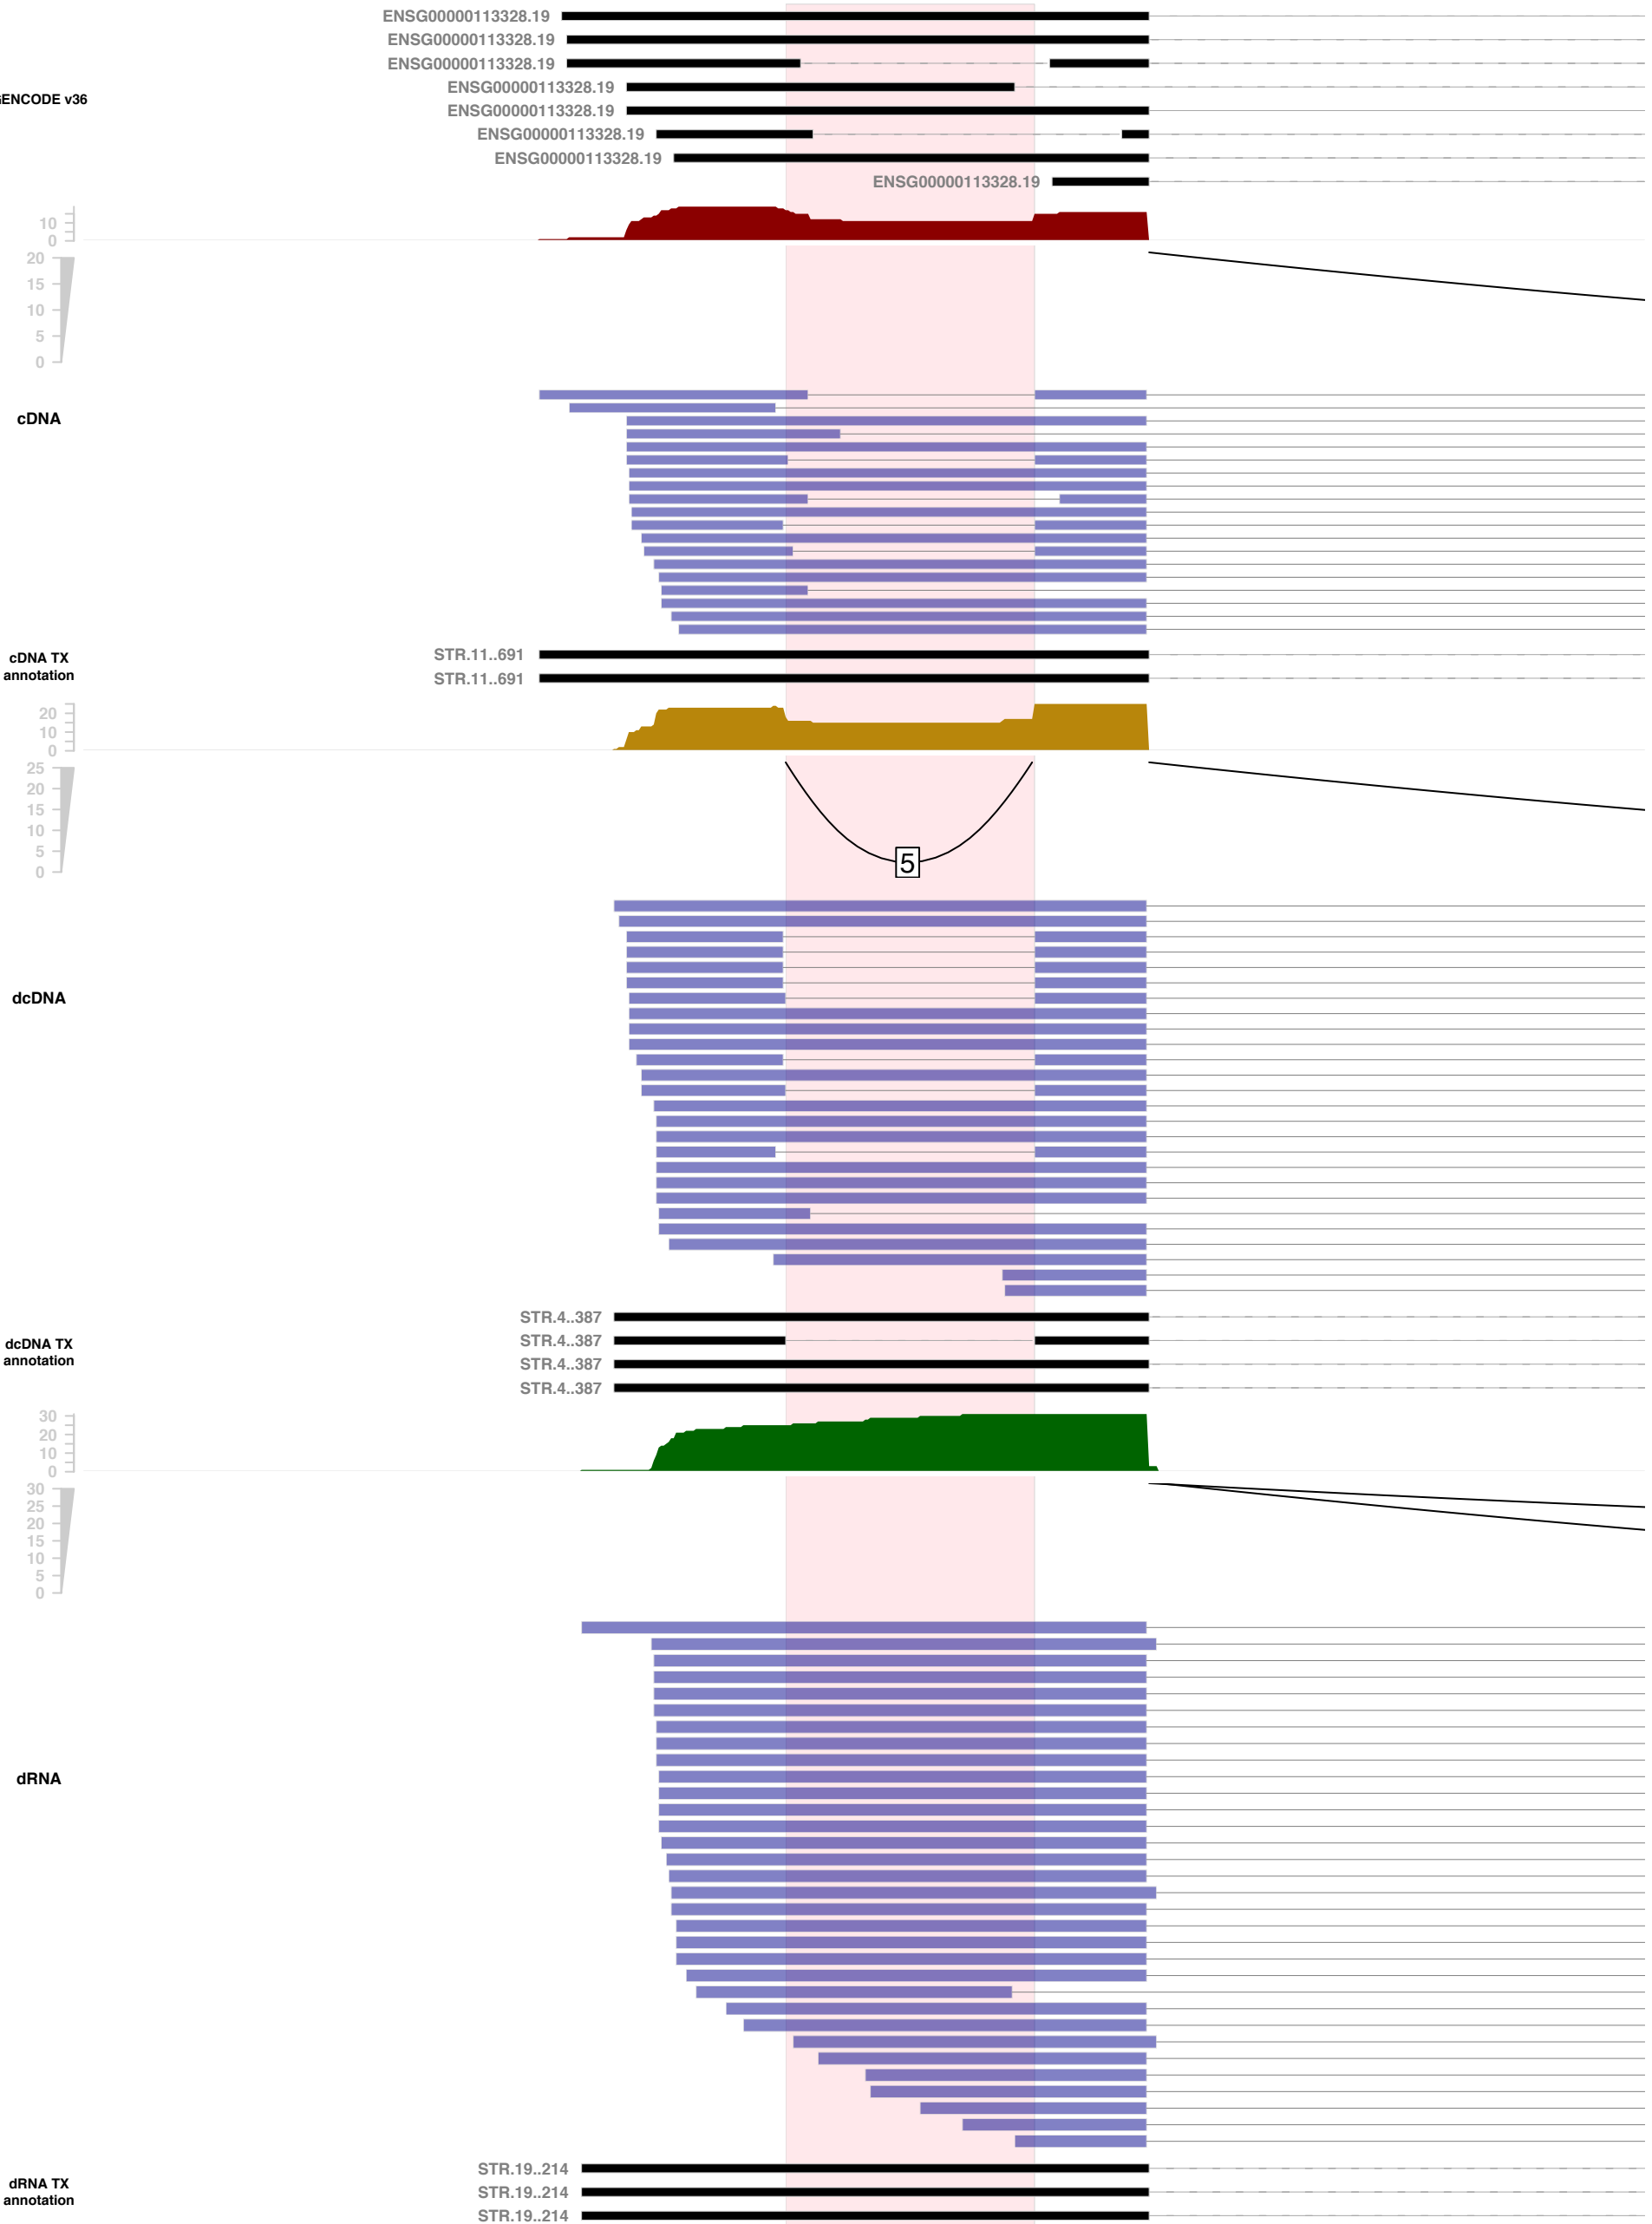

chr1:10457345-10459914:- DFFA

Cell line: NA12878

Direct repeat sequence: AACATAGCAAGACCC

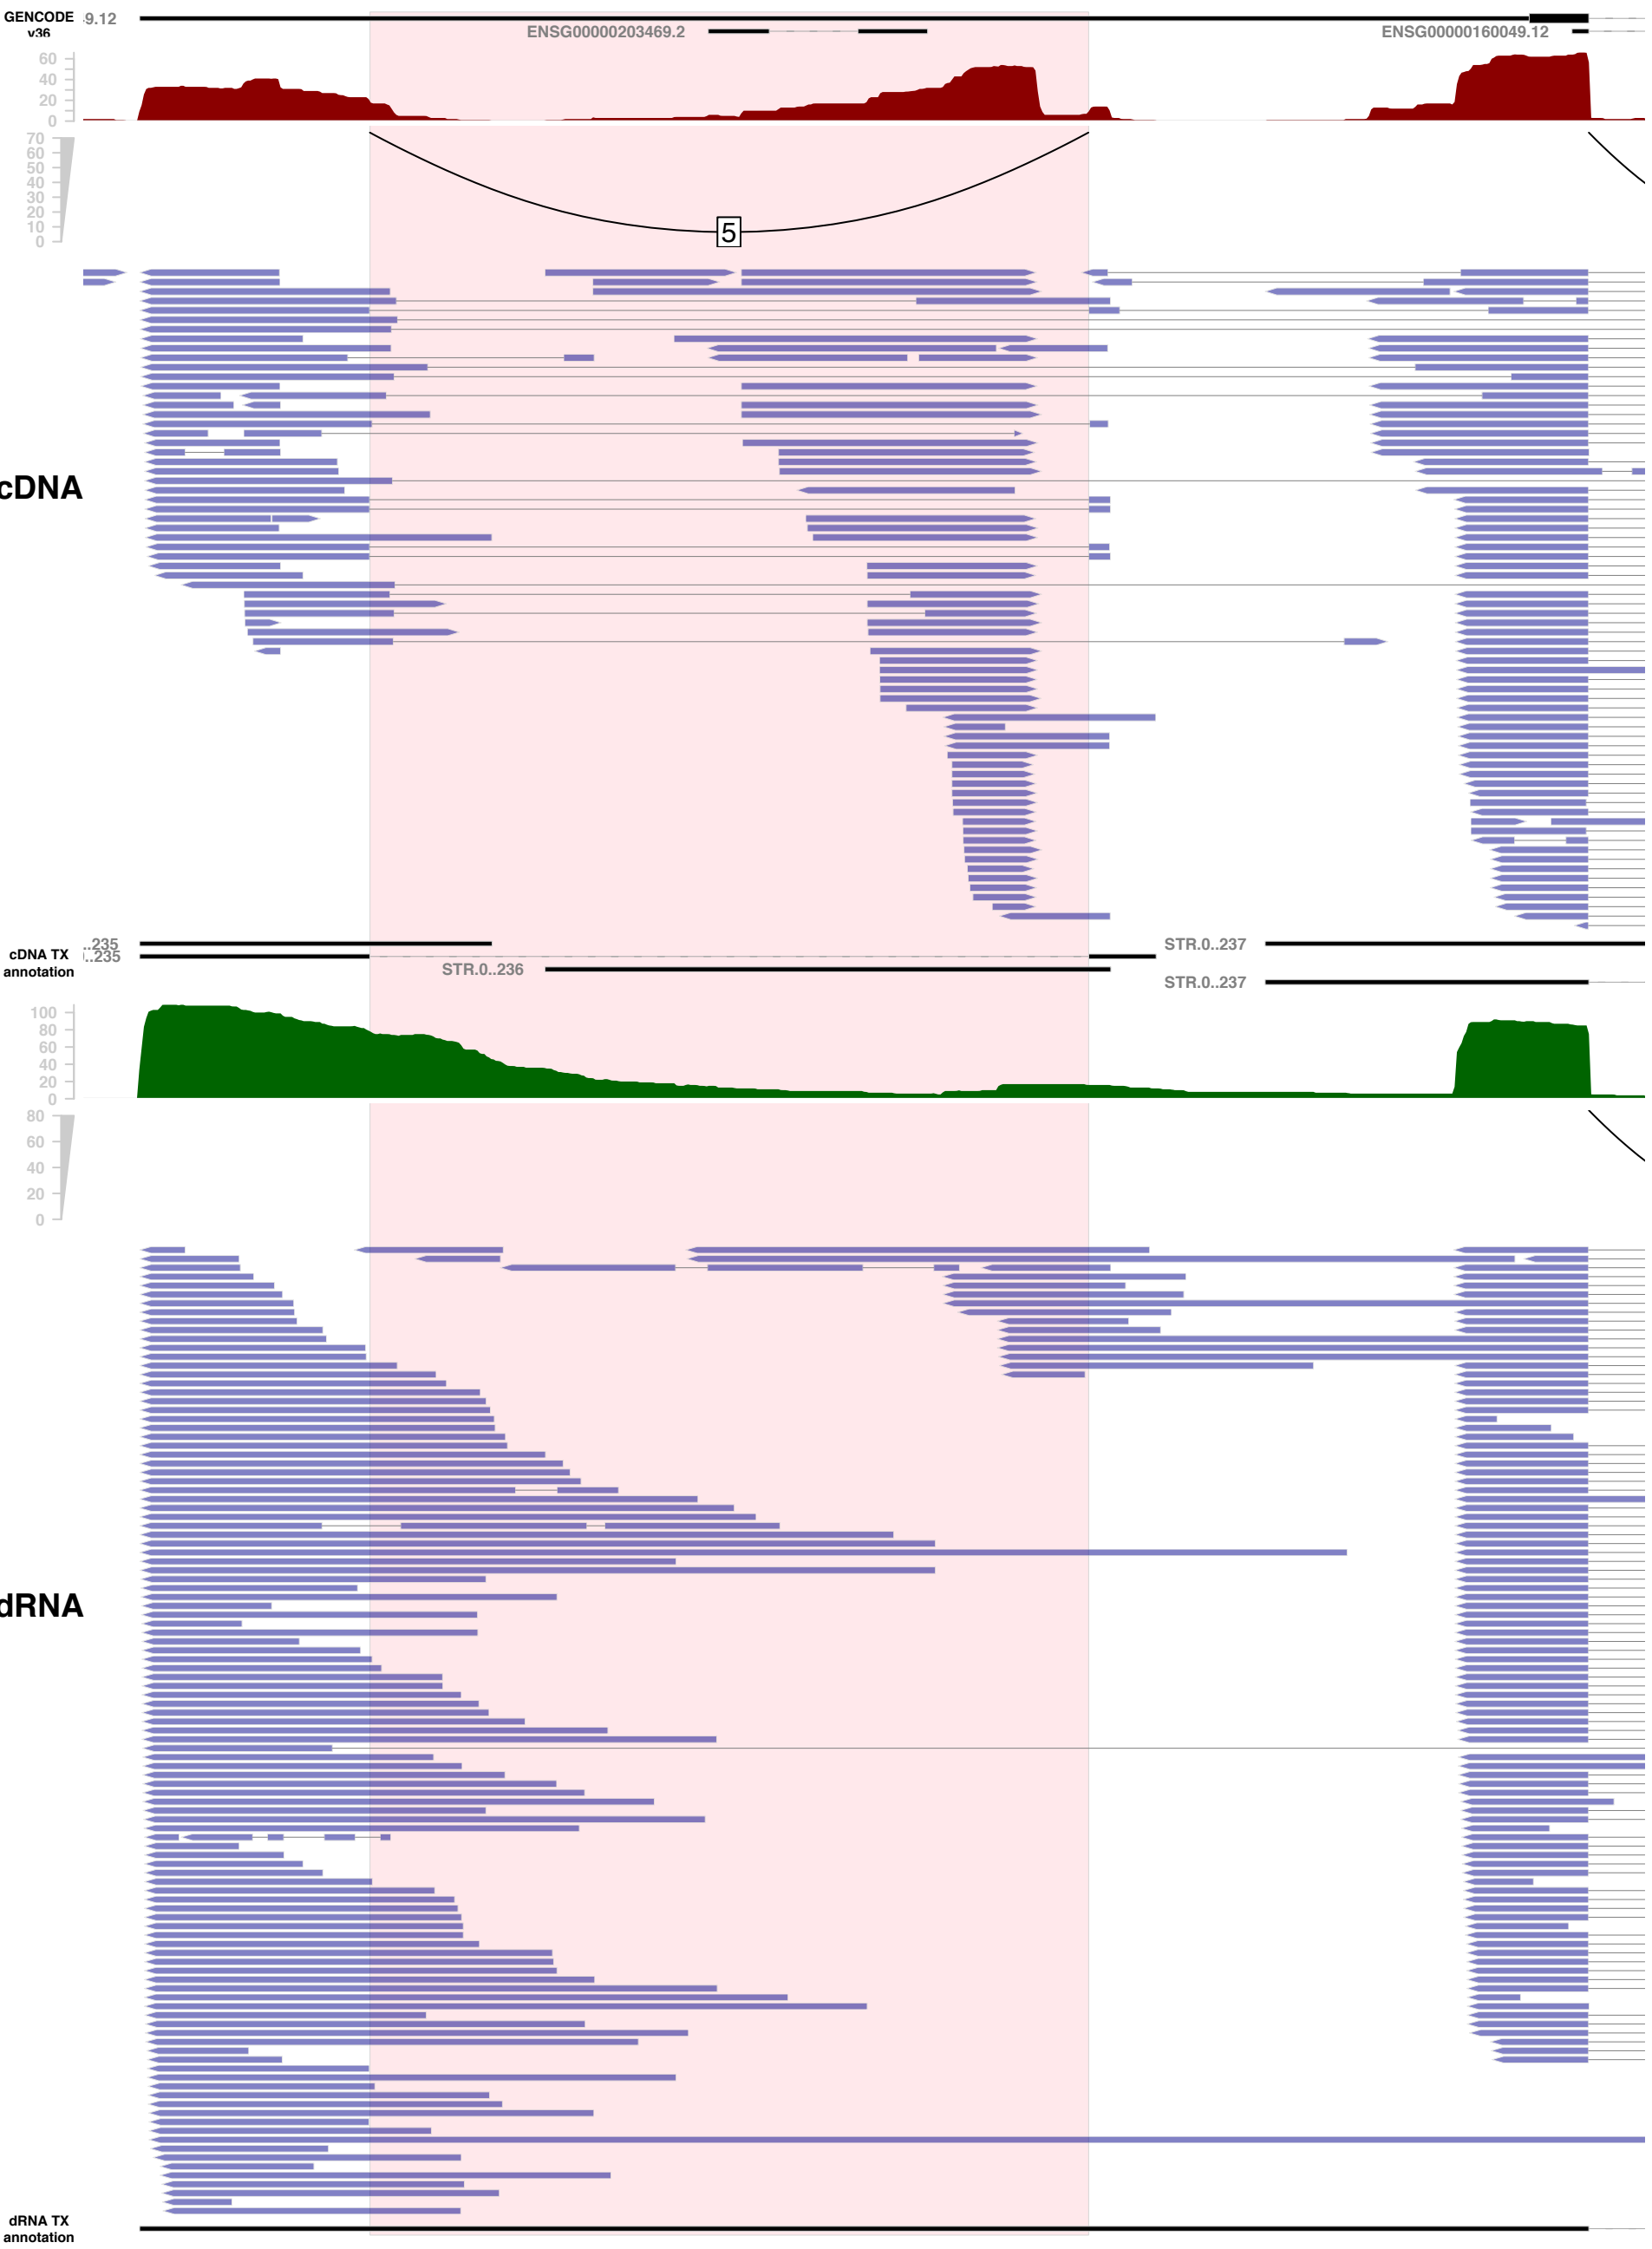

chr19:45703262-45703924:+ QPCTL

Cell line: NA12878

Direct repeat sequence: CAGCC

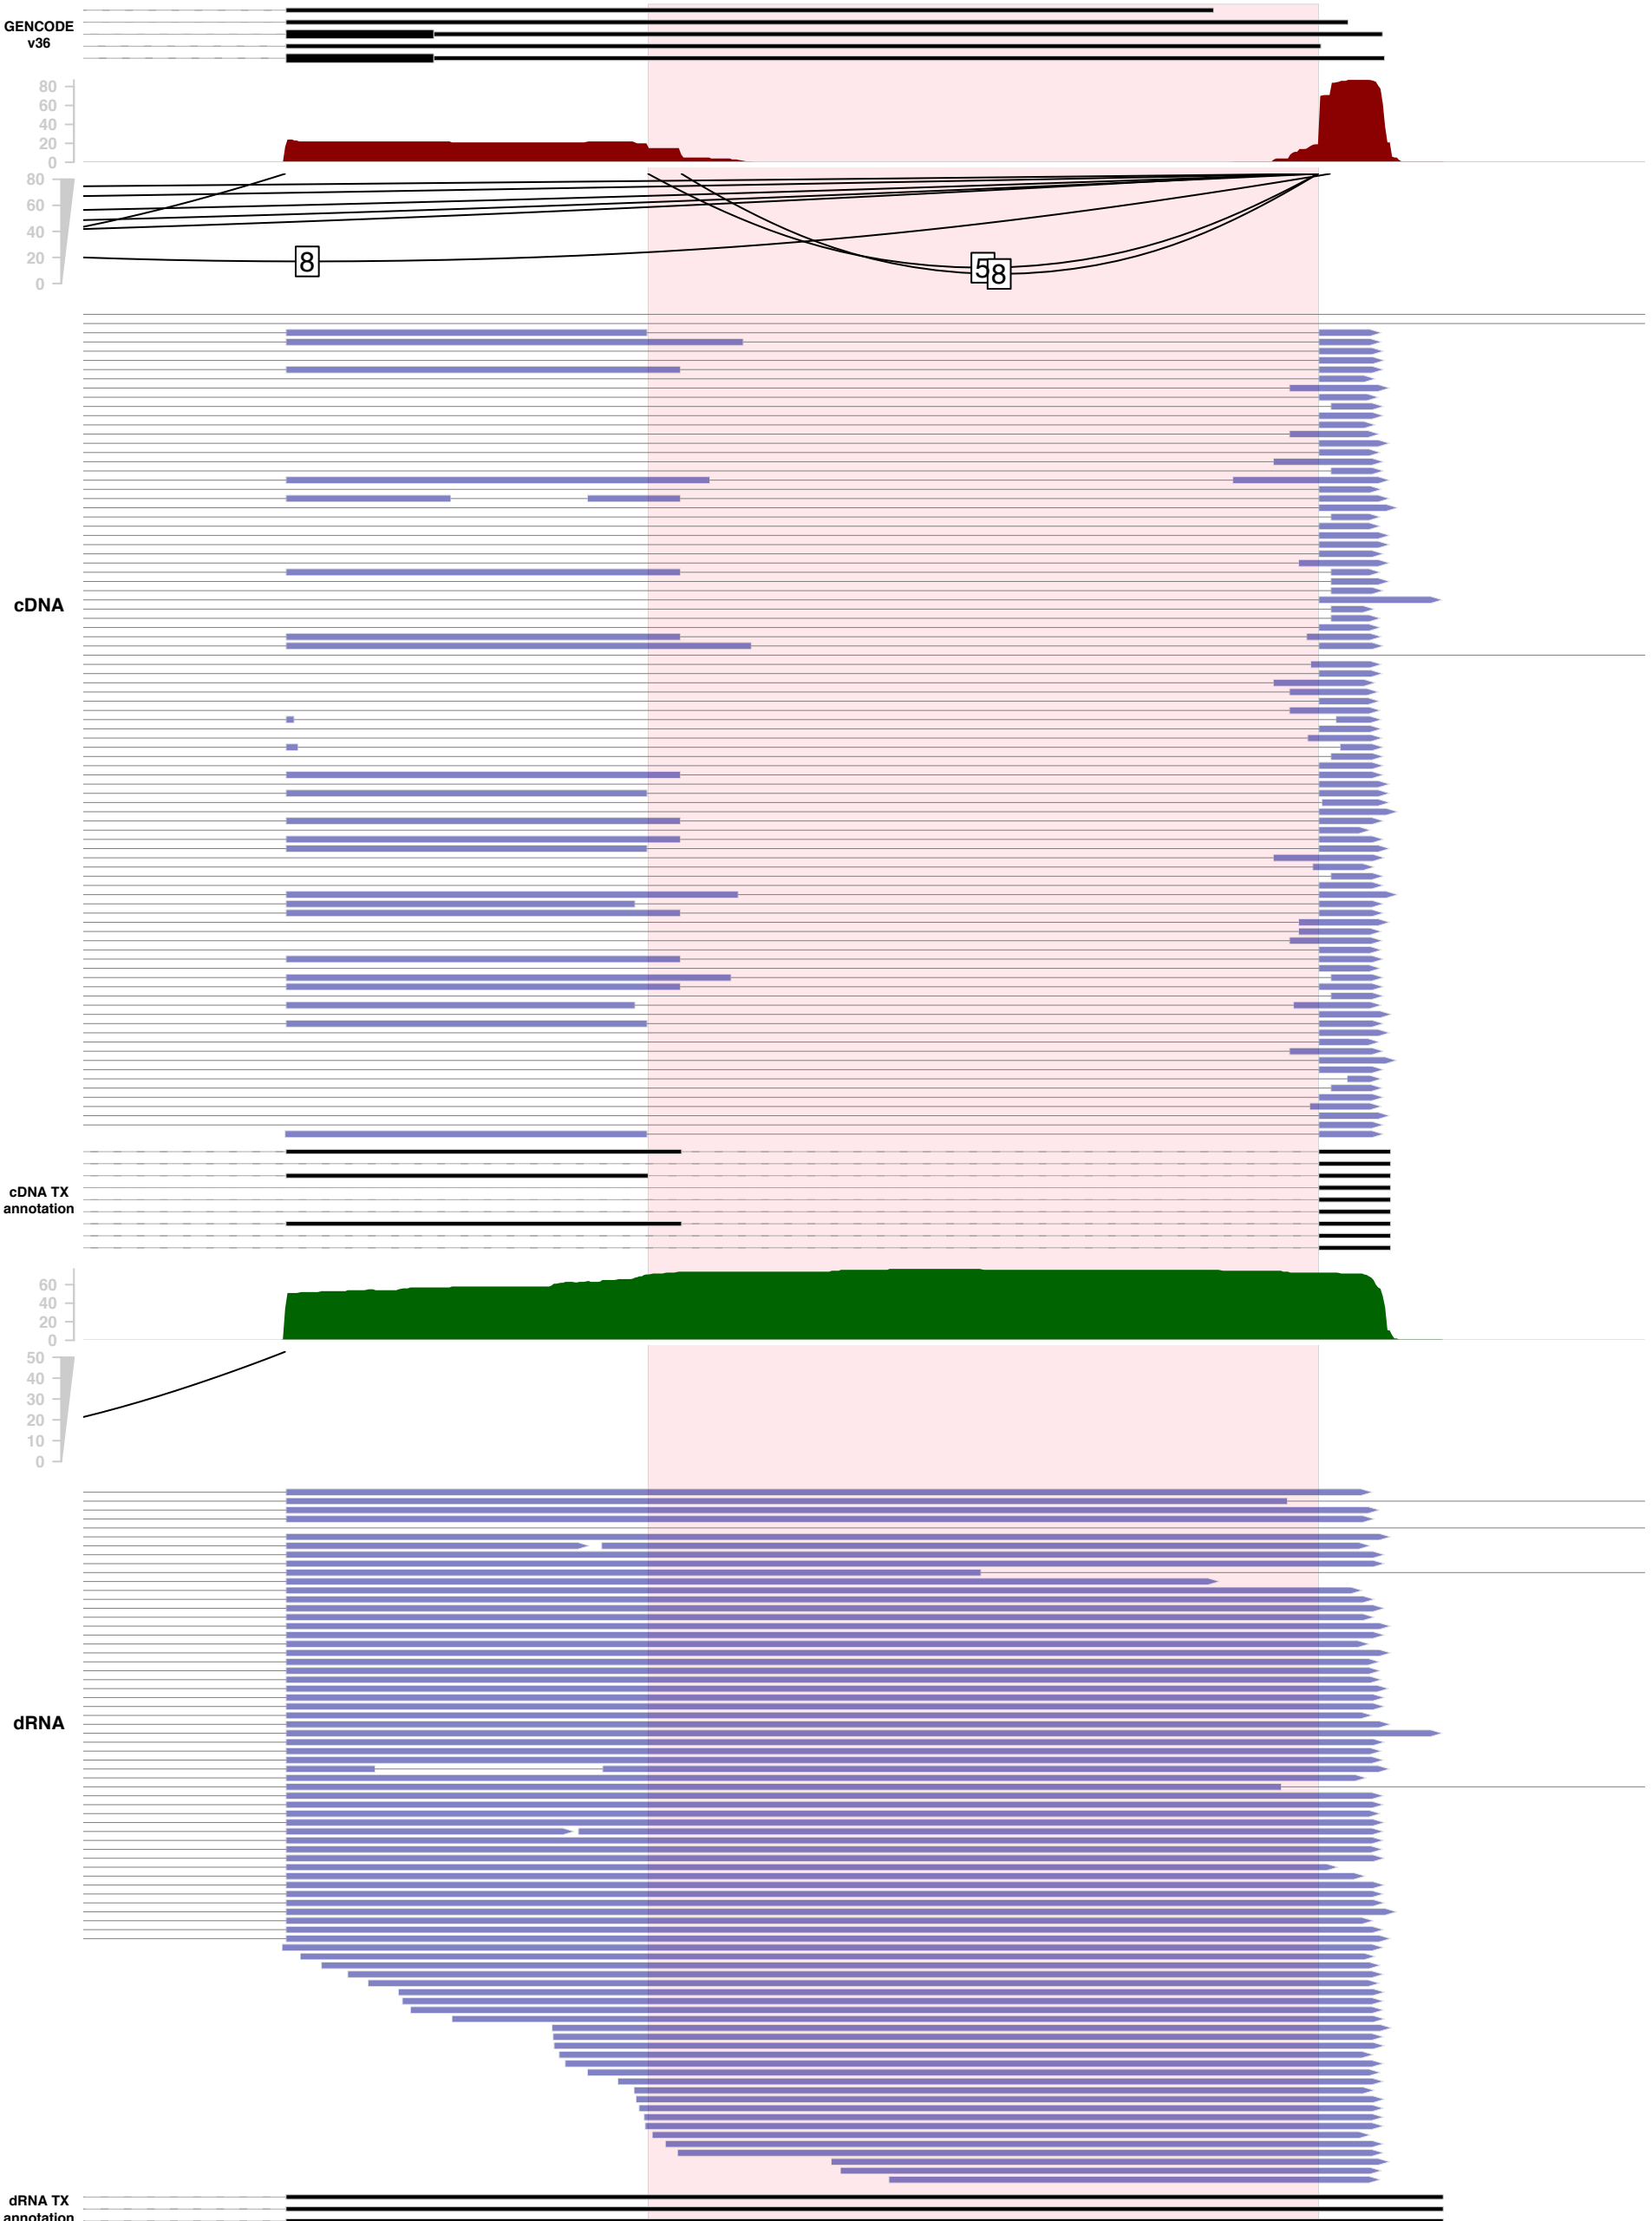



chr20:18487692-18488637:- RBBP9

Cell line: NA12878

Direct repeat sequence: CATG

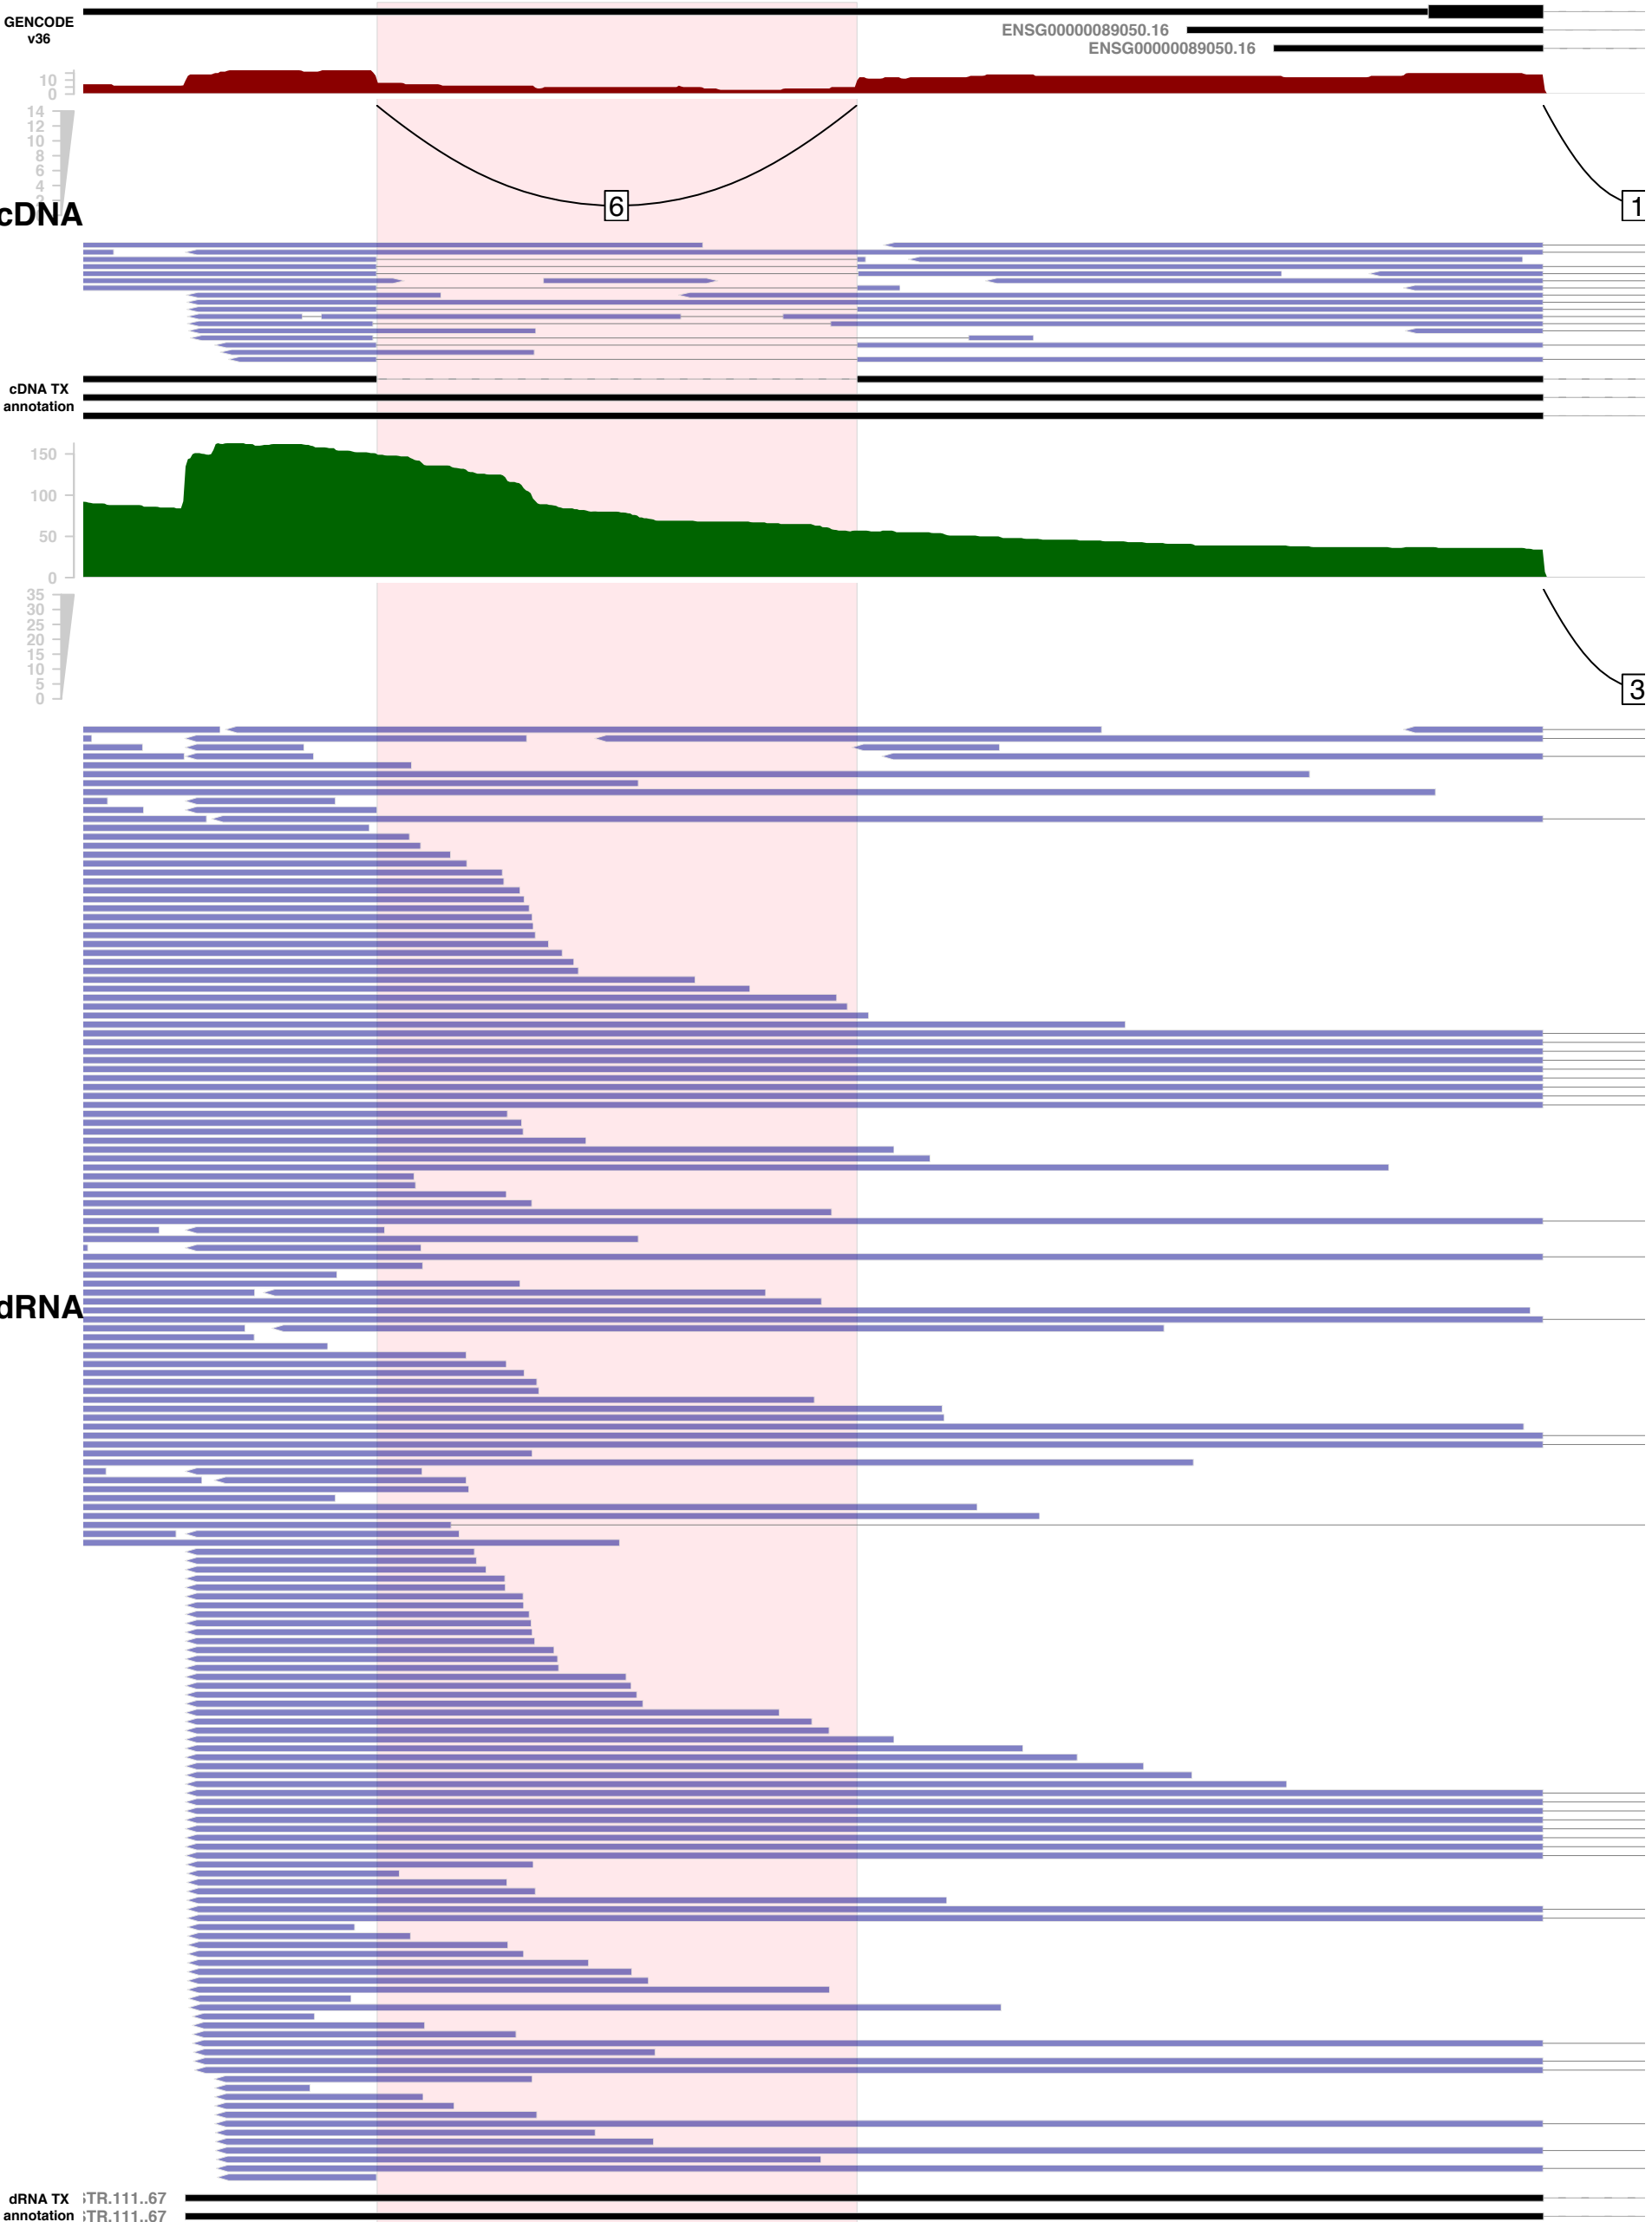

chr2:37202365-37204573:+ CEBPZOS

Cell line: NA12878

Direct repeat sequence: CAGCCA

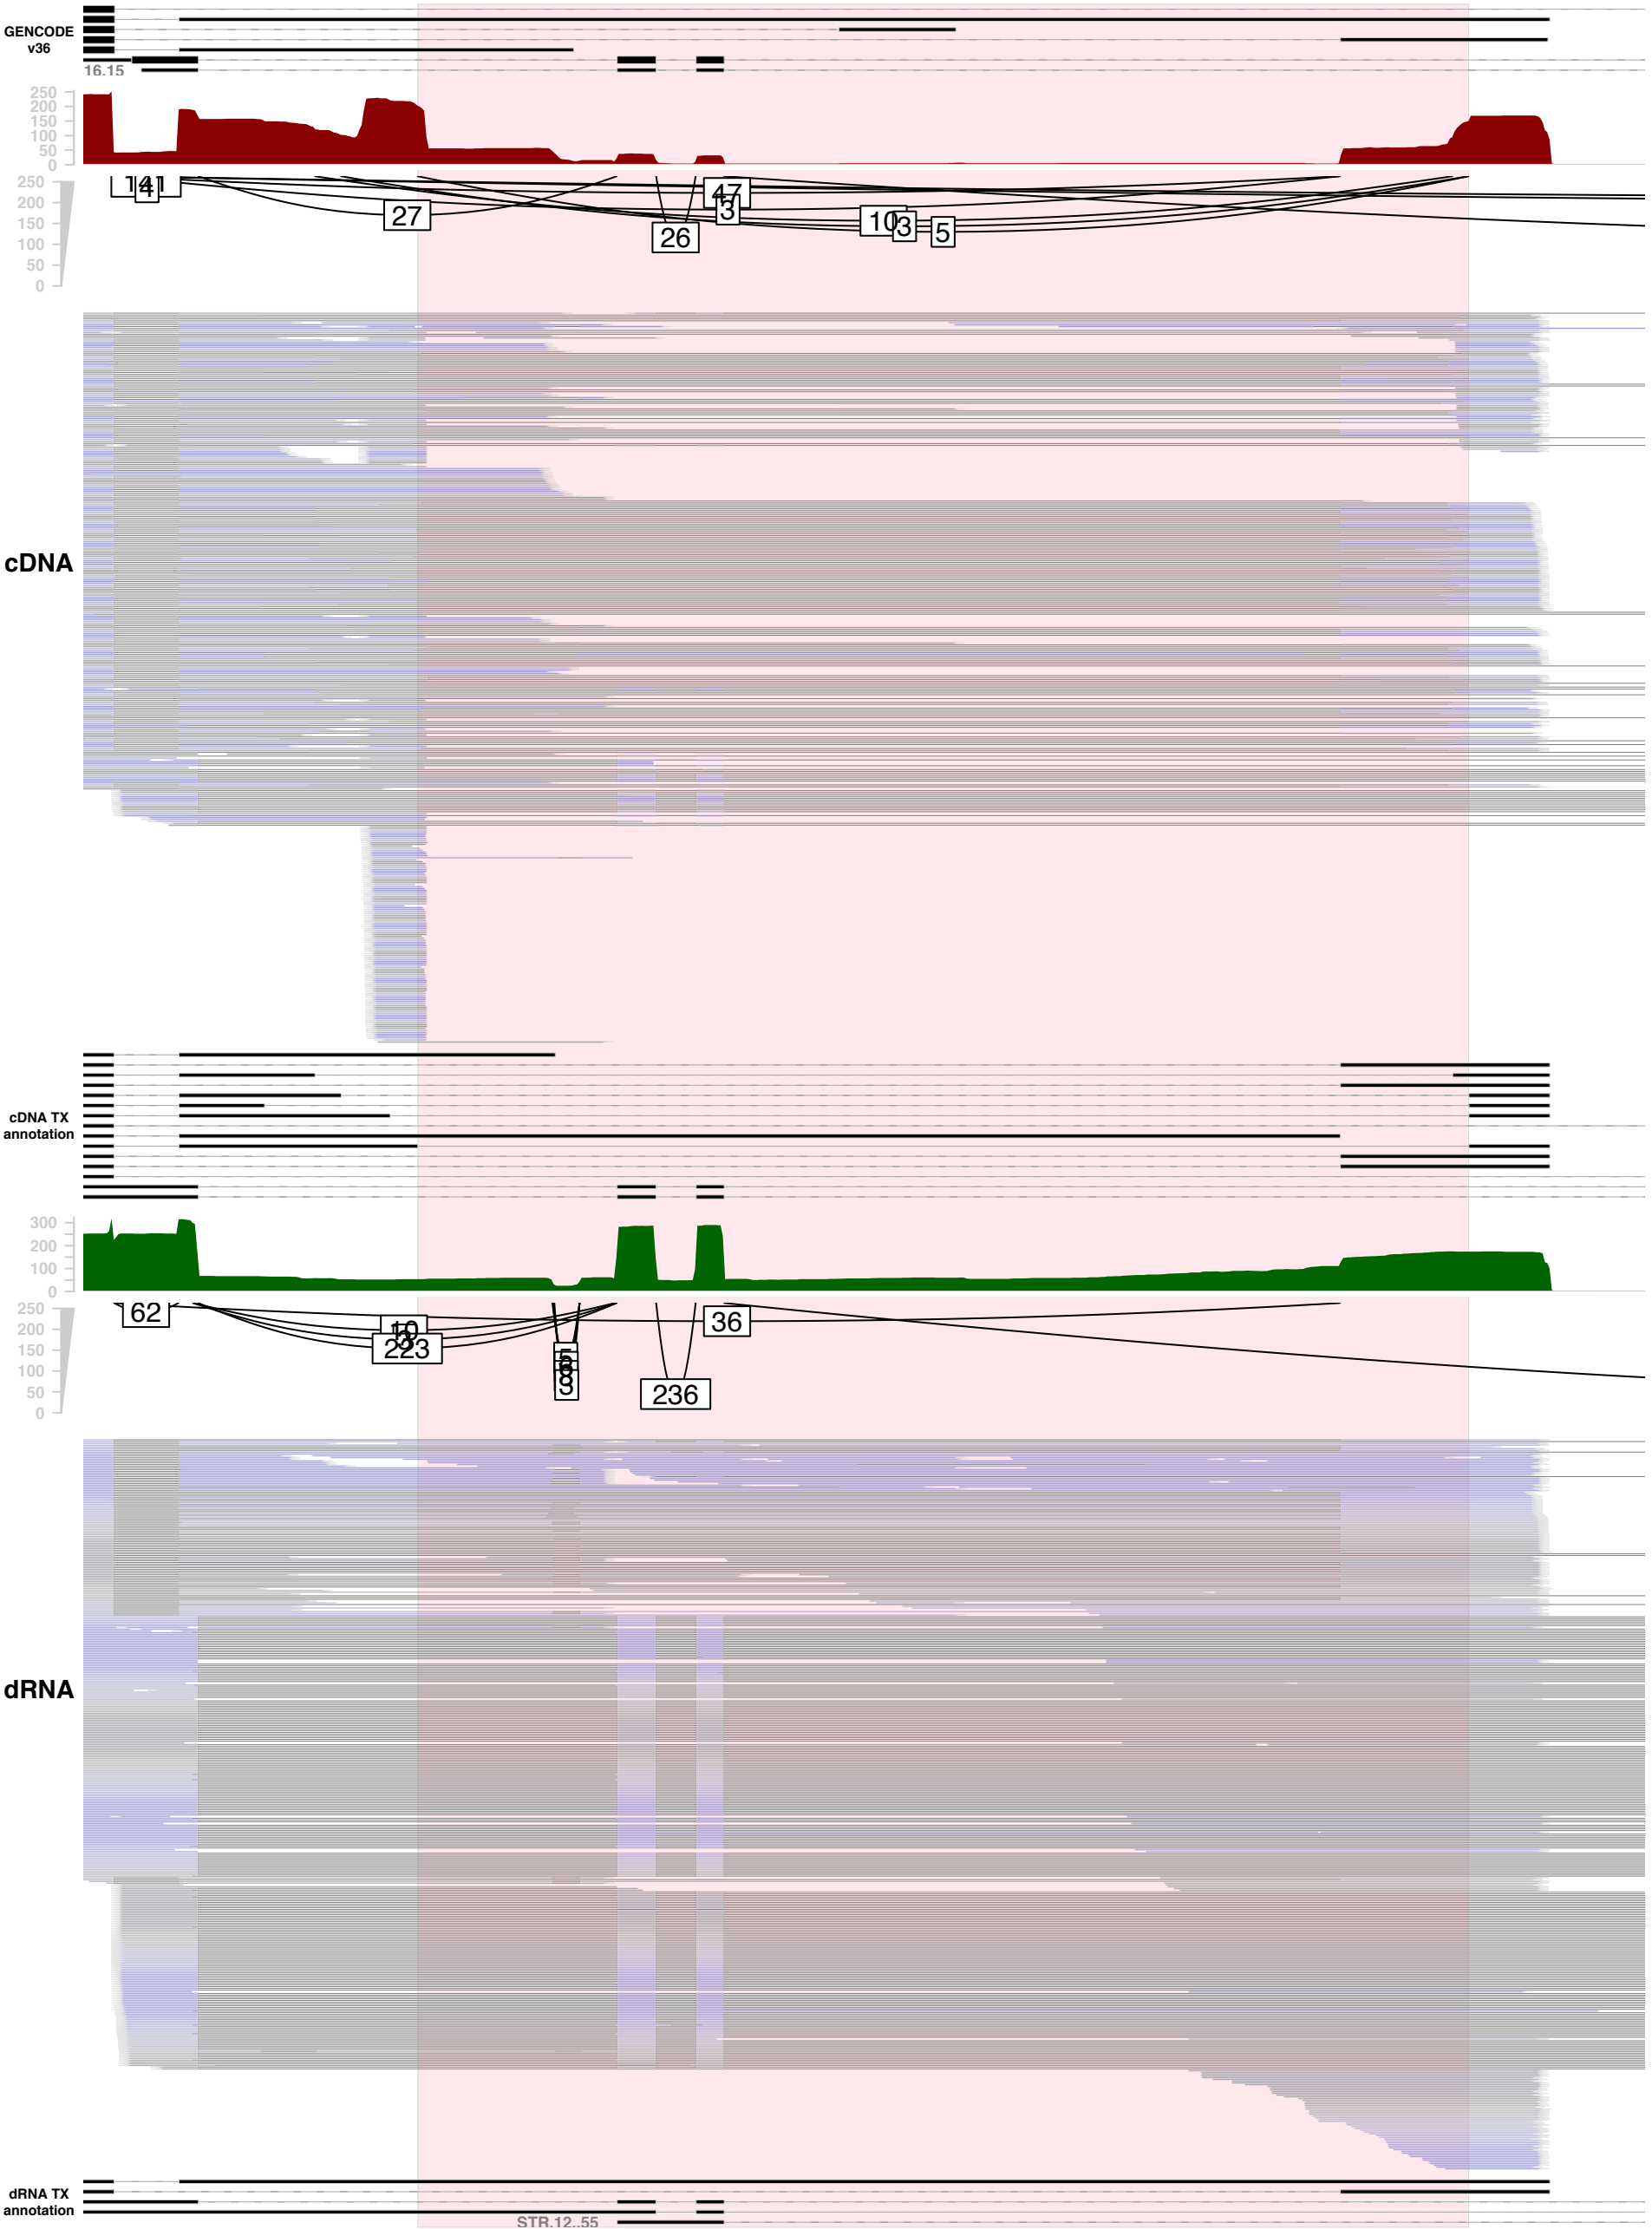

chr2:37202149-37204539:+ CEBPZOS

Cell line: NA12878

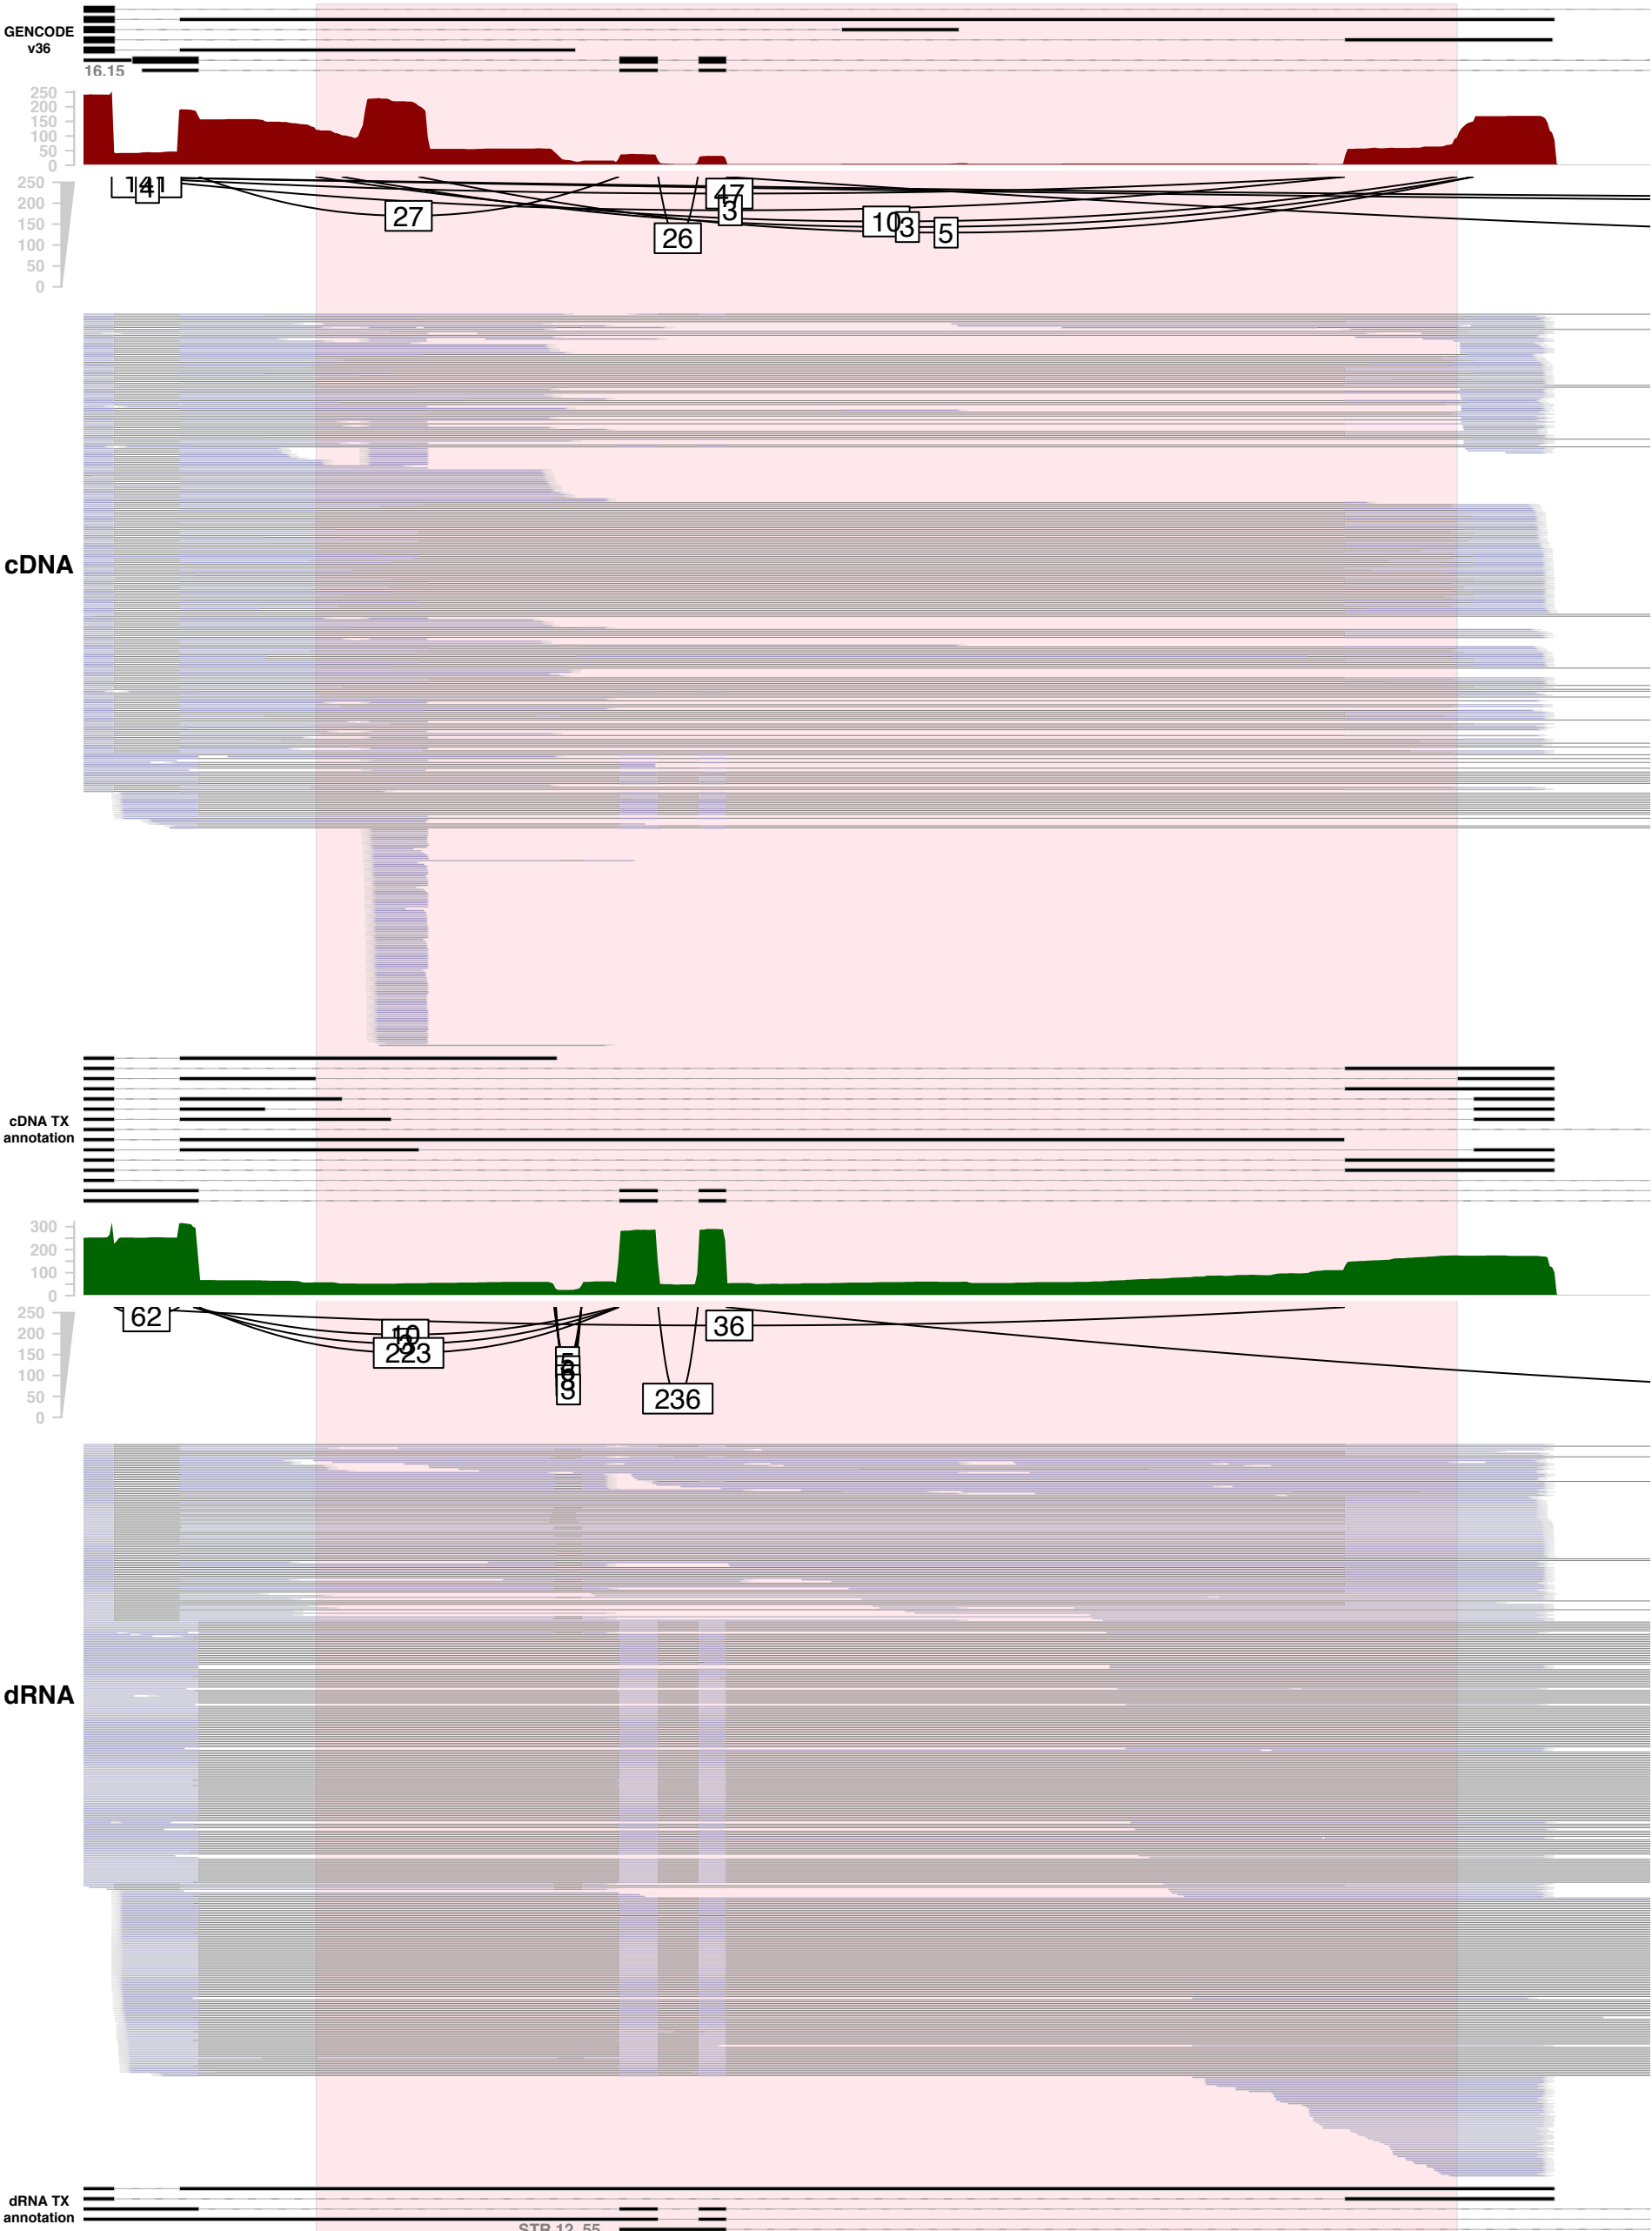

chrX:119583452-119584366:+ UBE2A

Cell line: NA12878

Direct repeat sequence: ATGTA

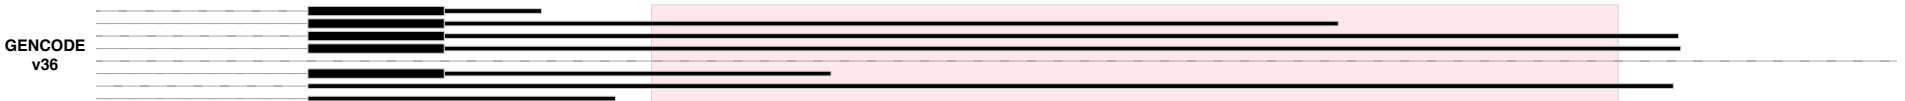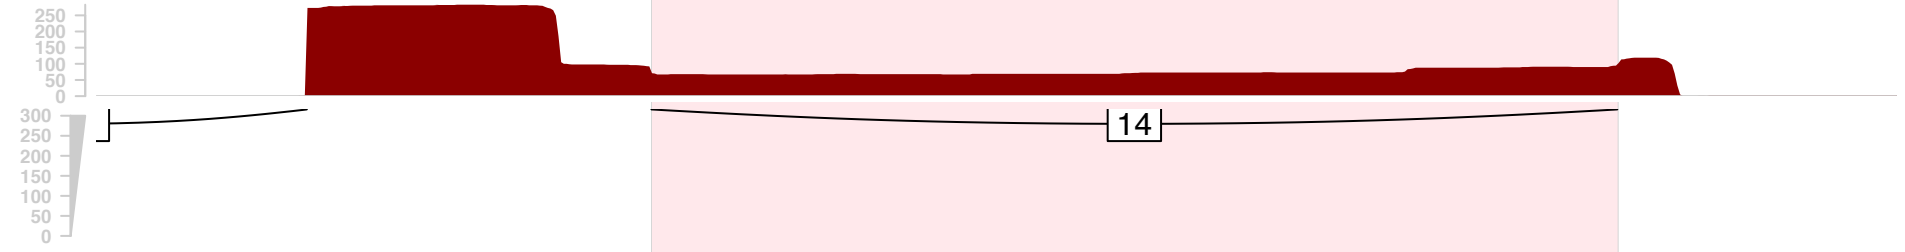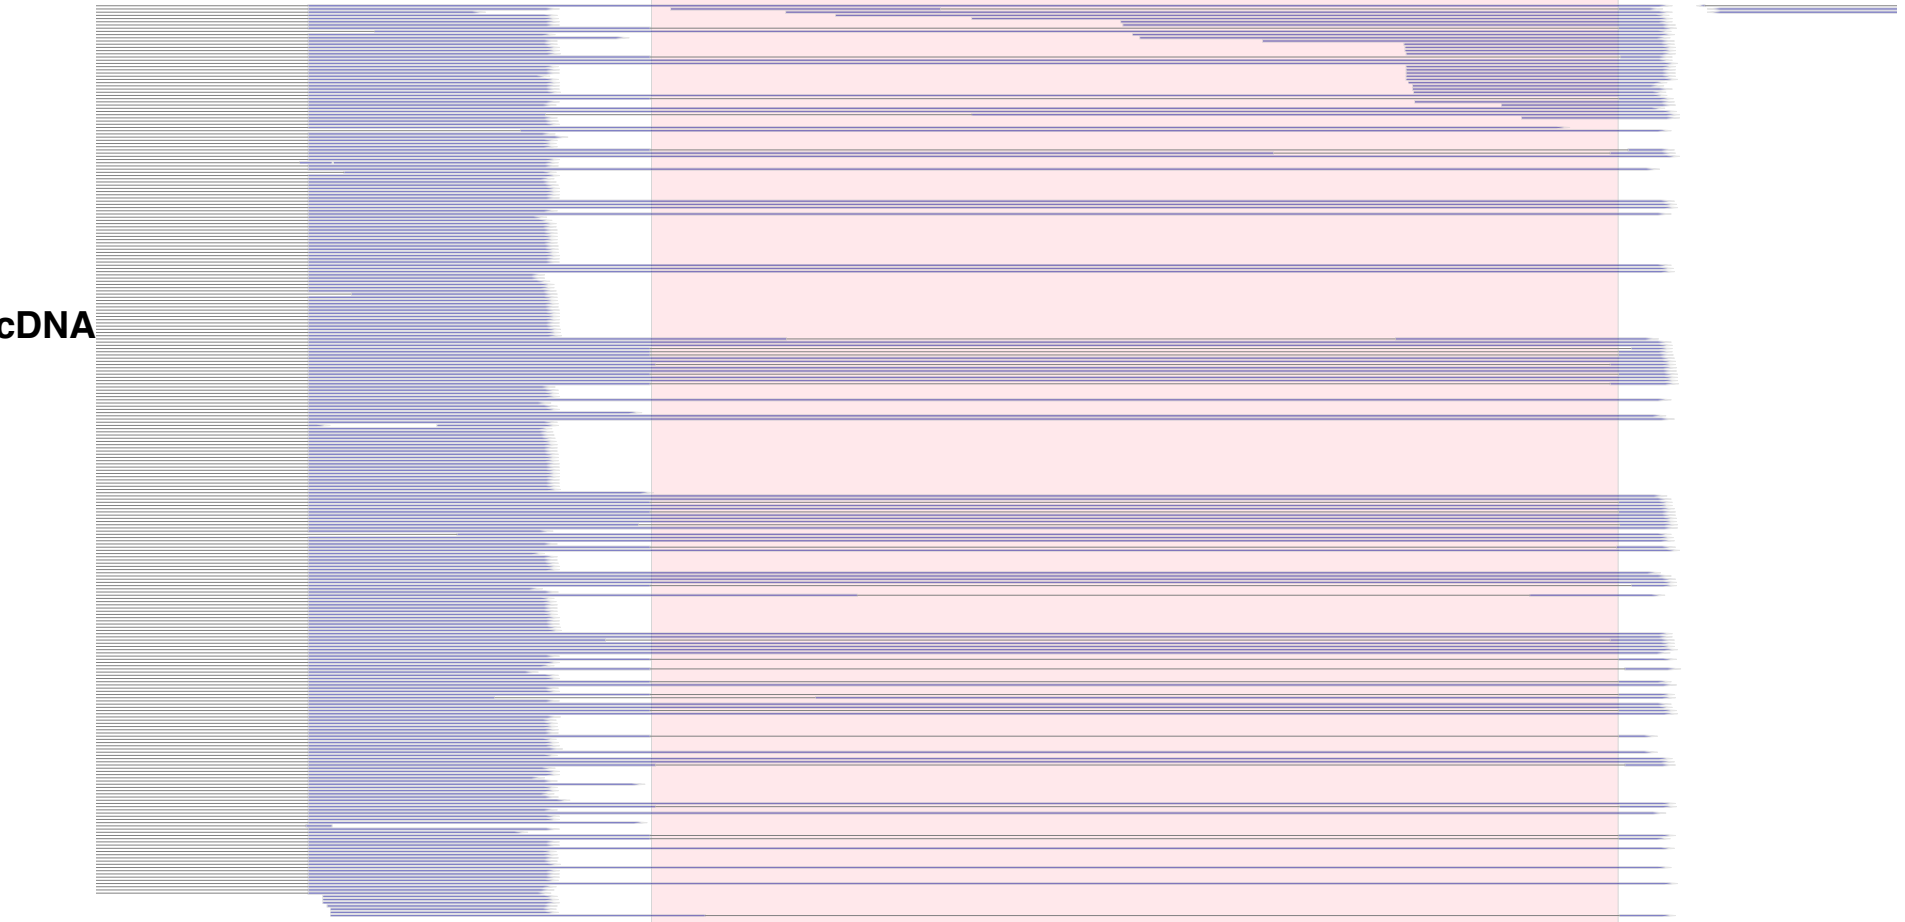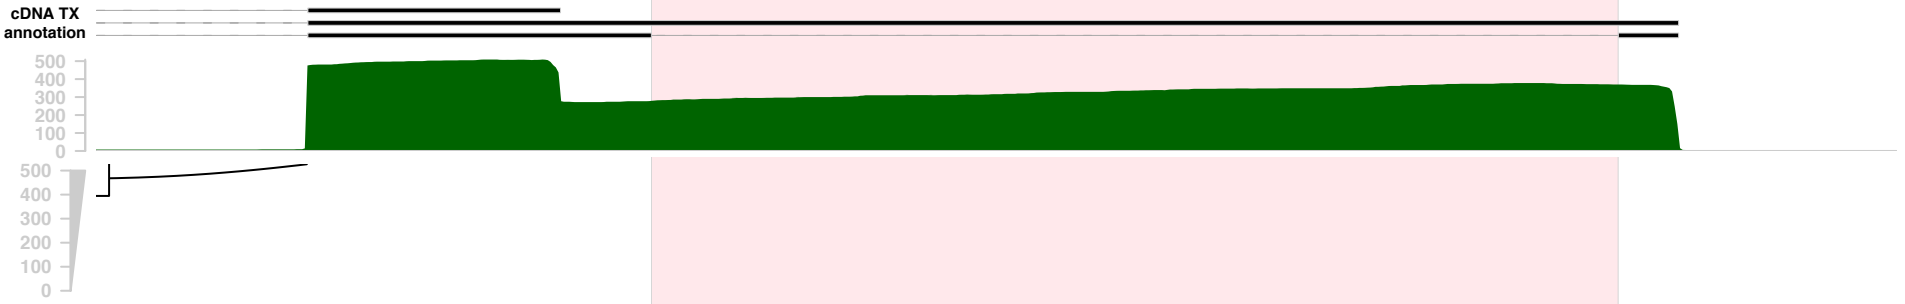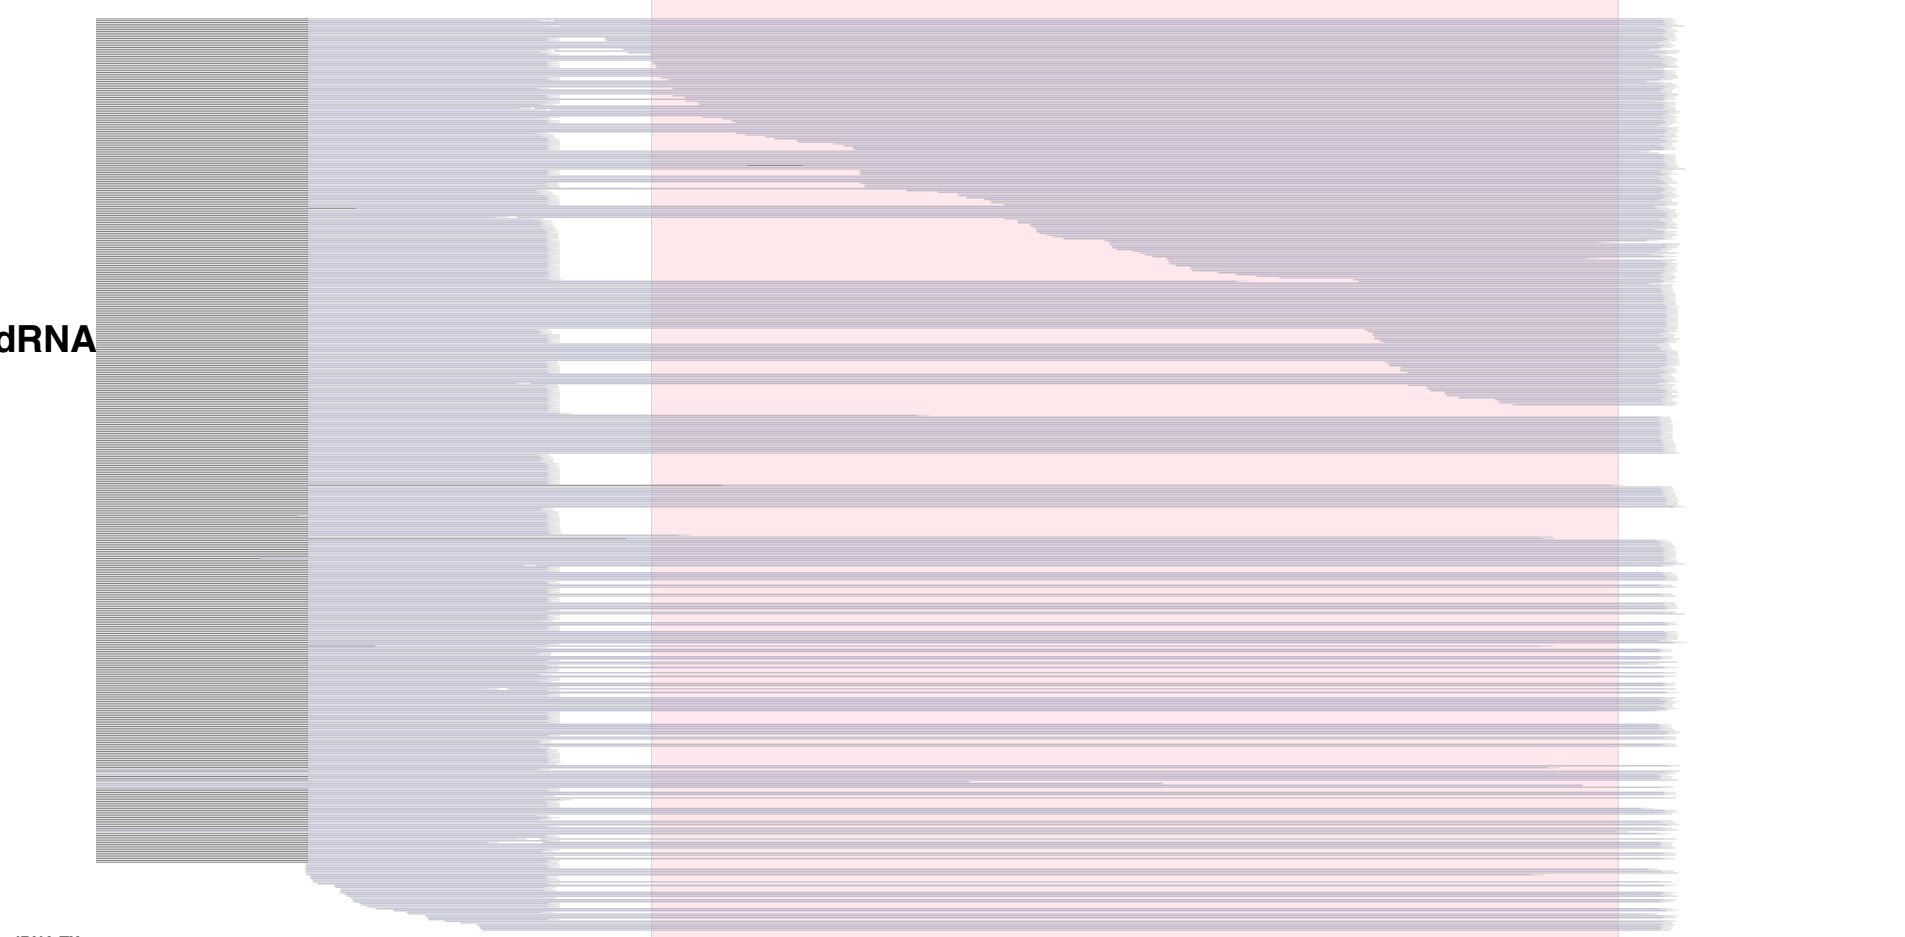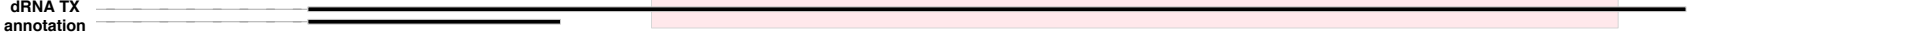

chr2:113204982-113205613:+ PSD4

Cell line: NA12878

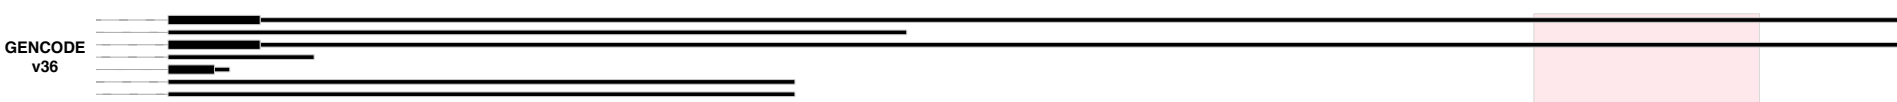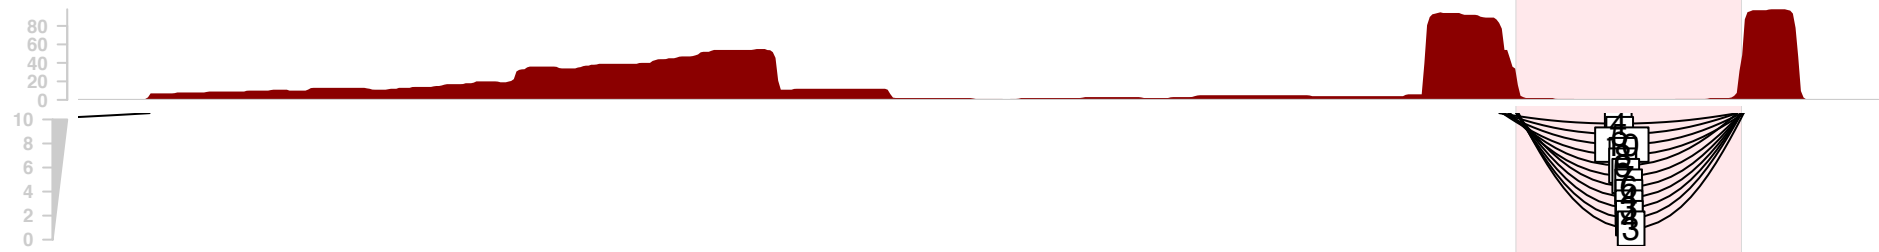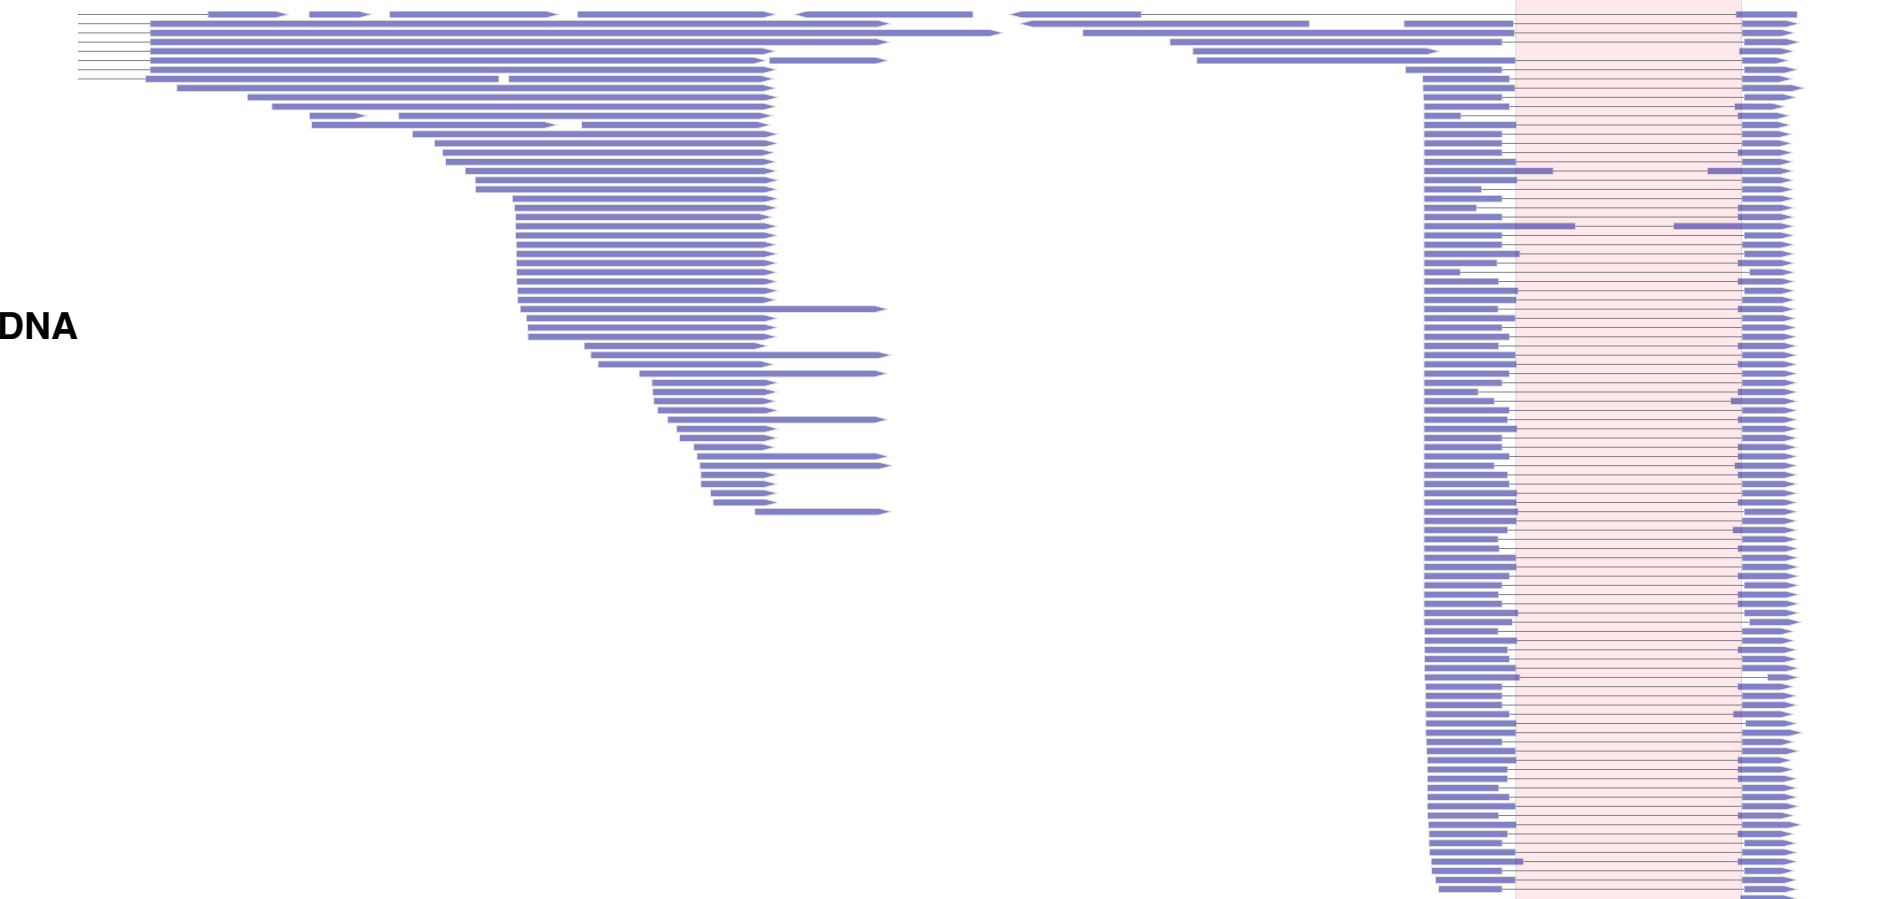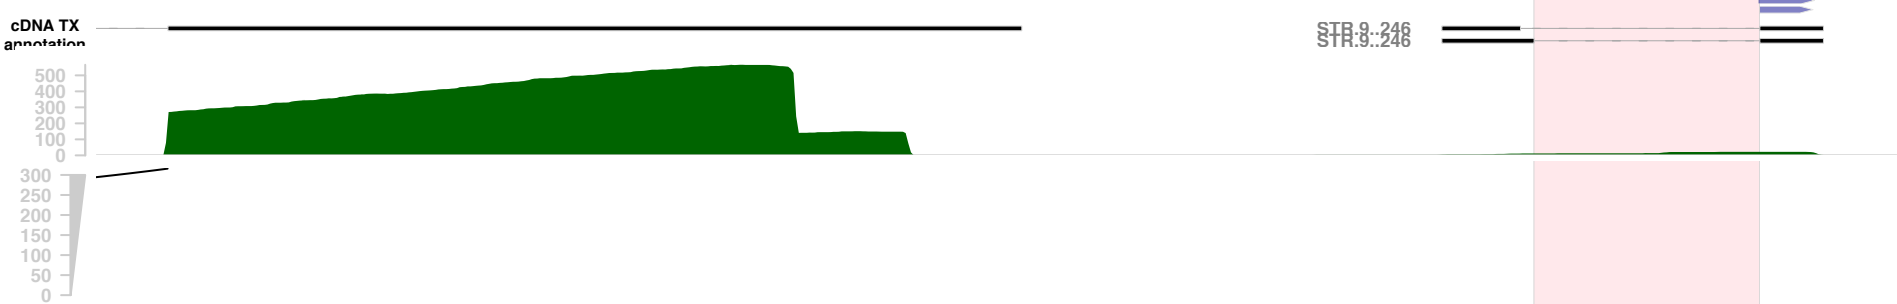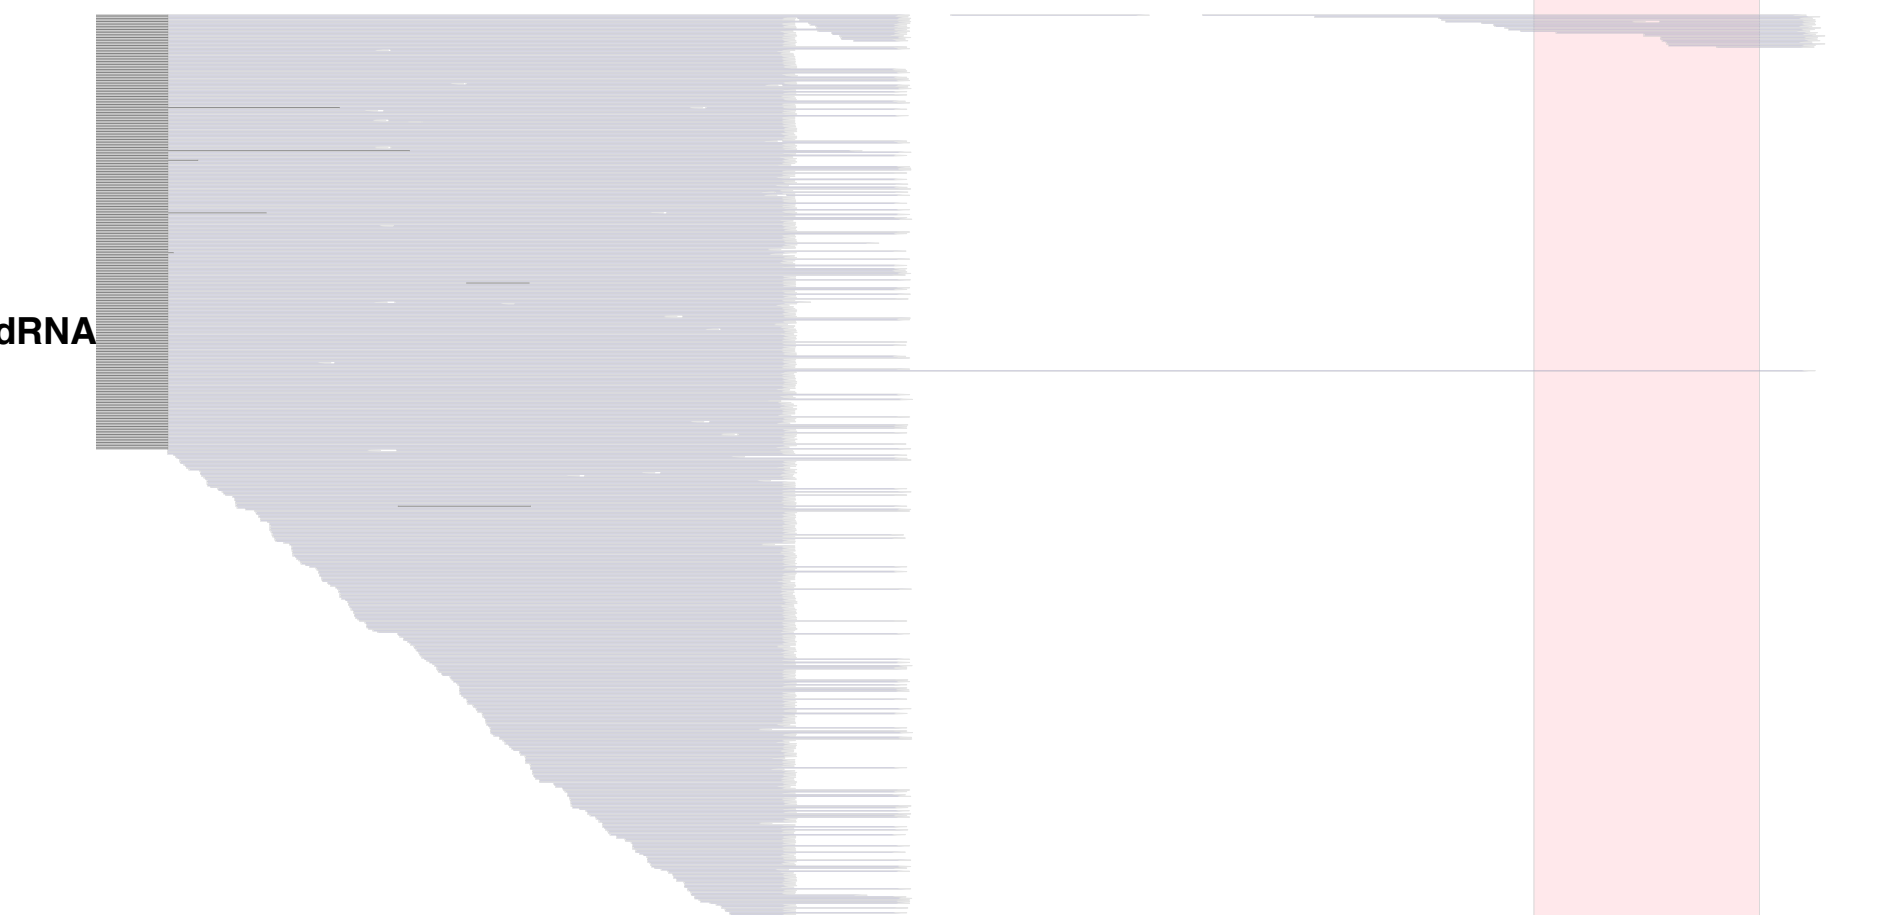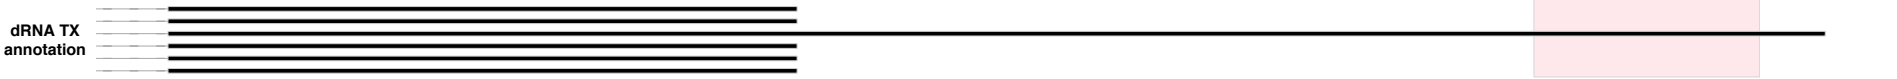

chr4:56459858-56460922:+ PAICS

Cell line: NA12878

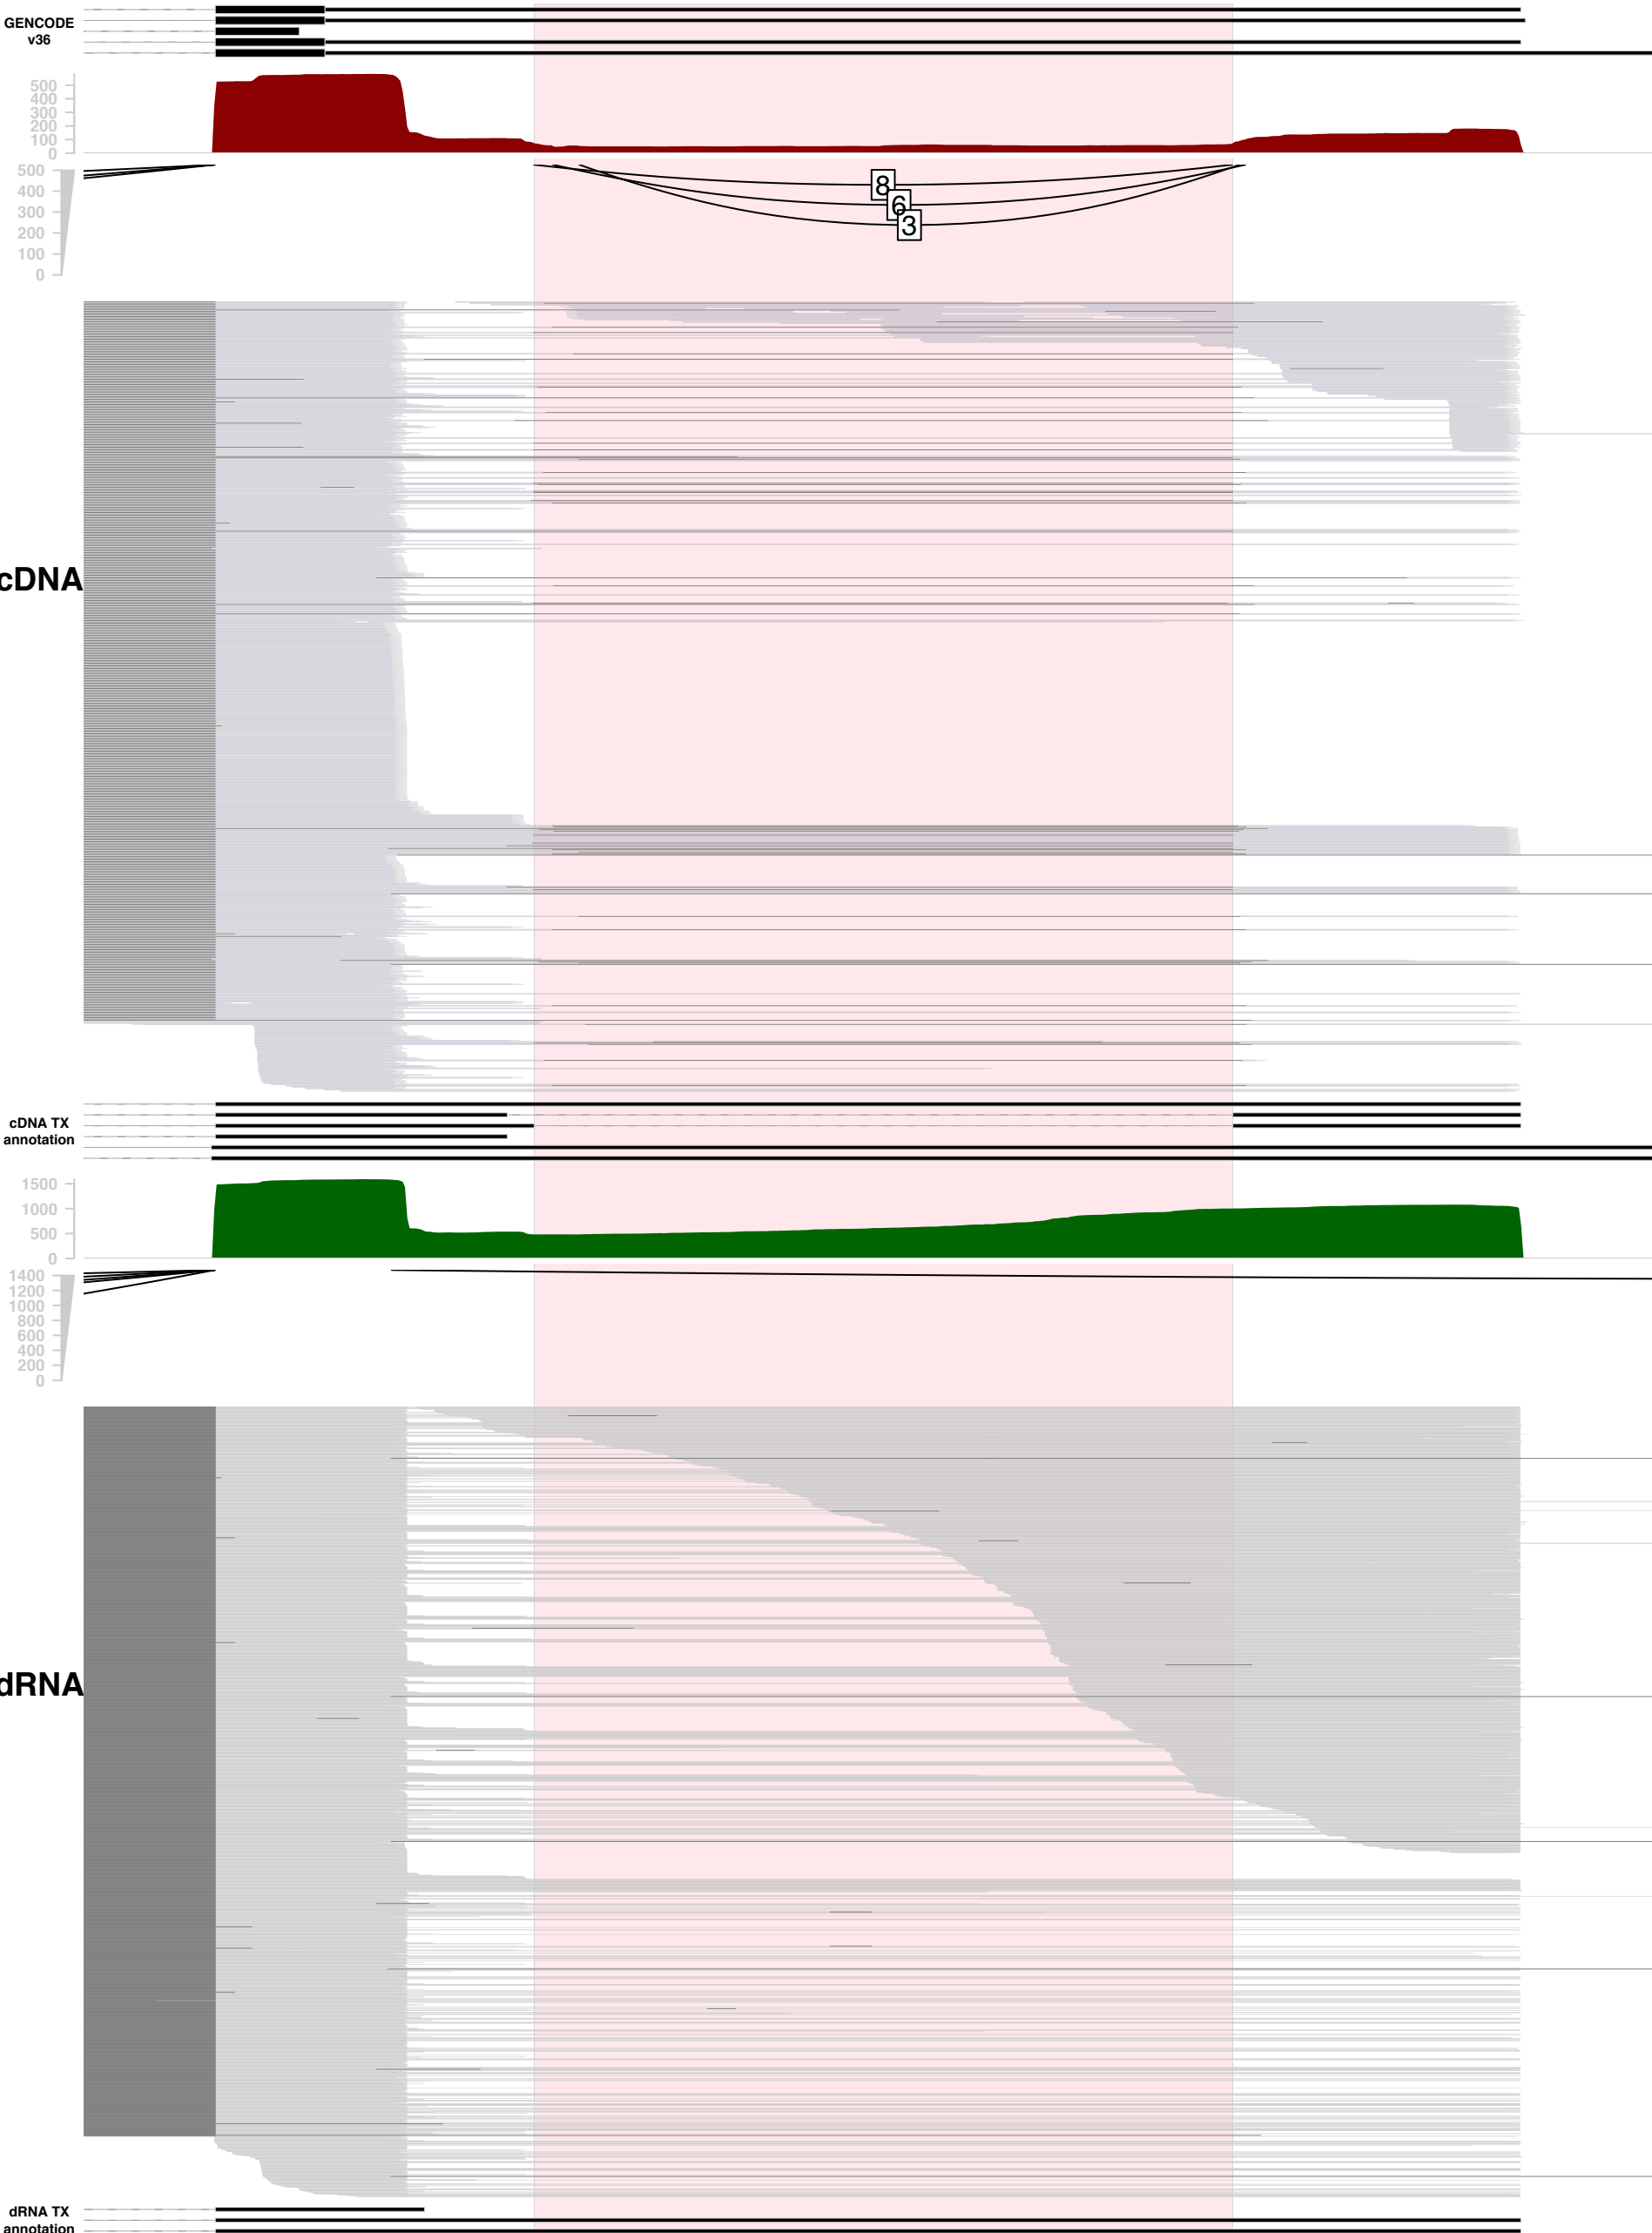

chr4:2938328-2938803:- NOP14

Cell line: NA12878

Direct repeat sequence: CTGG

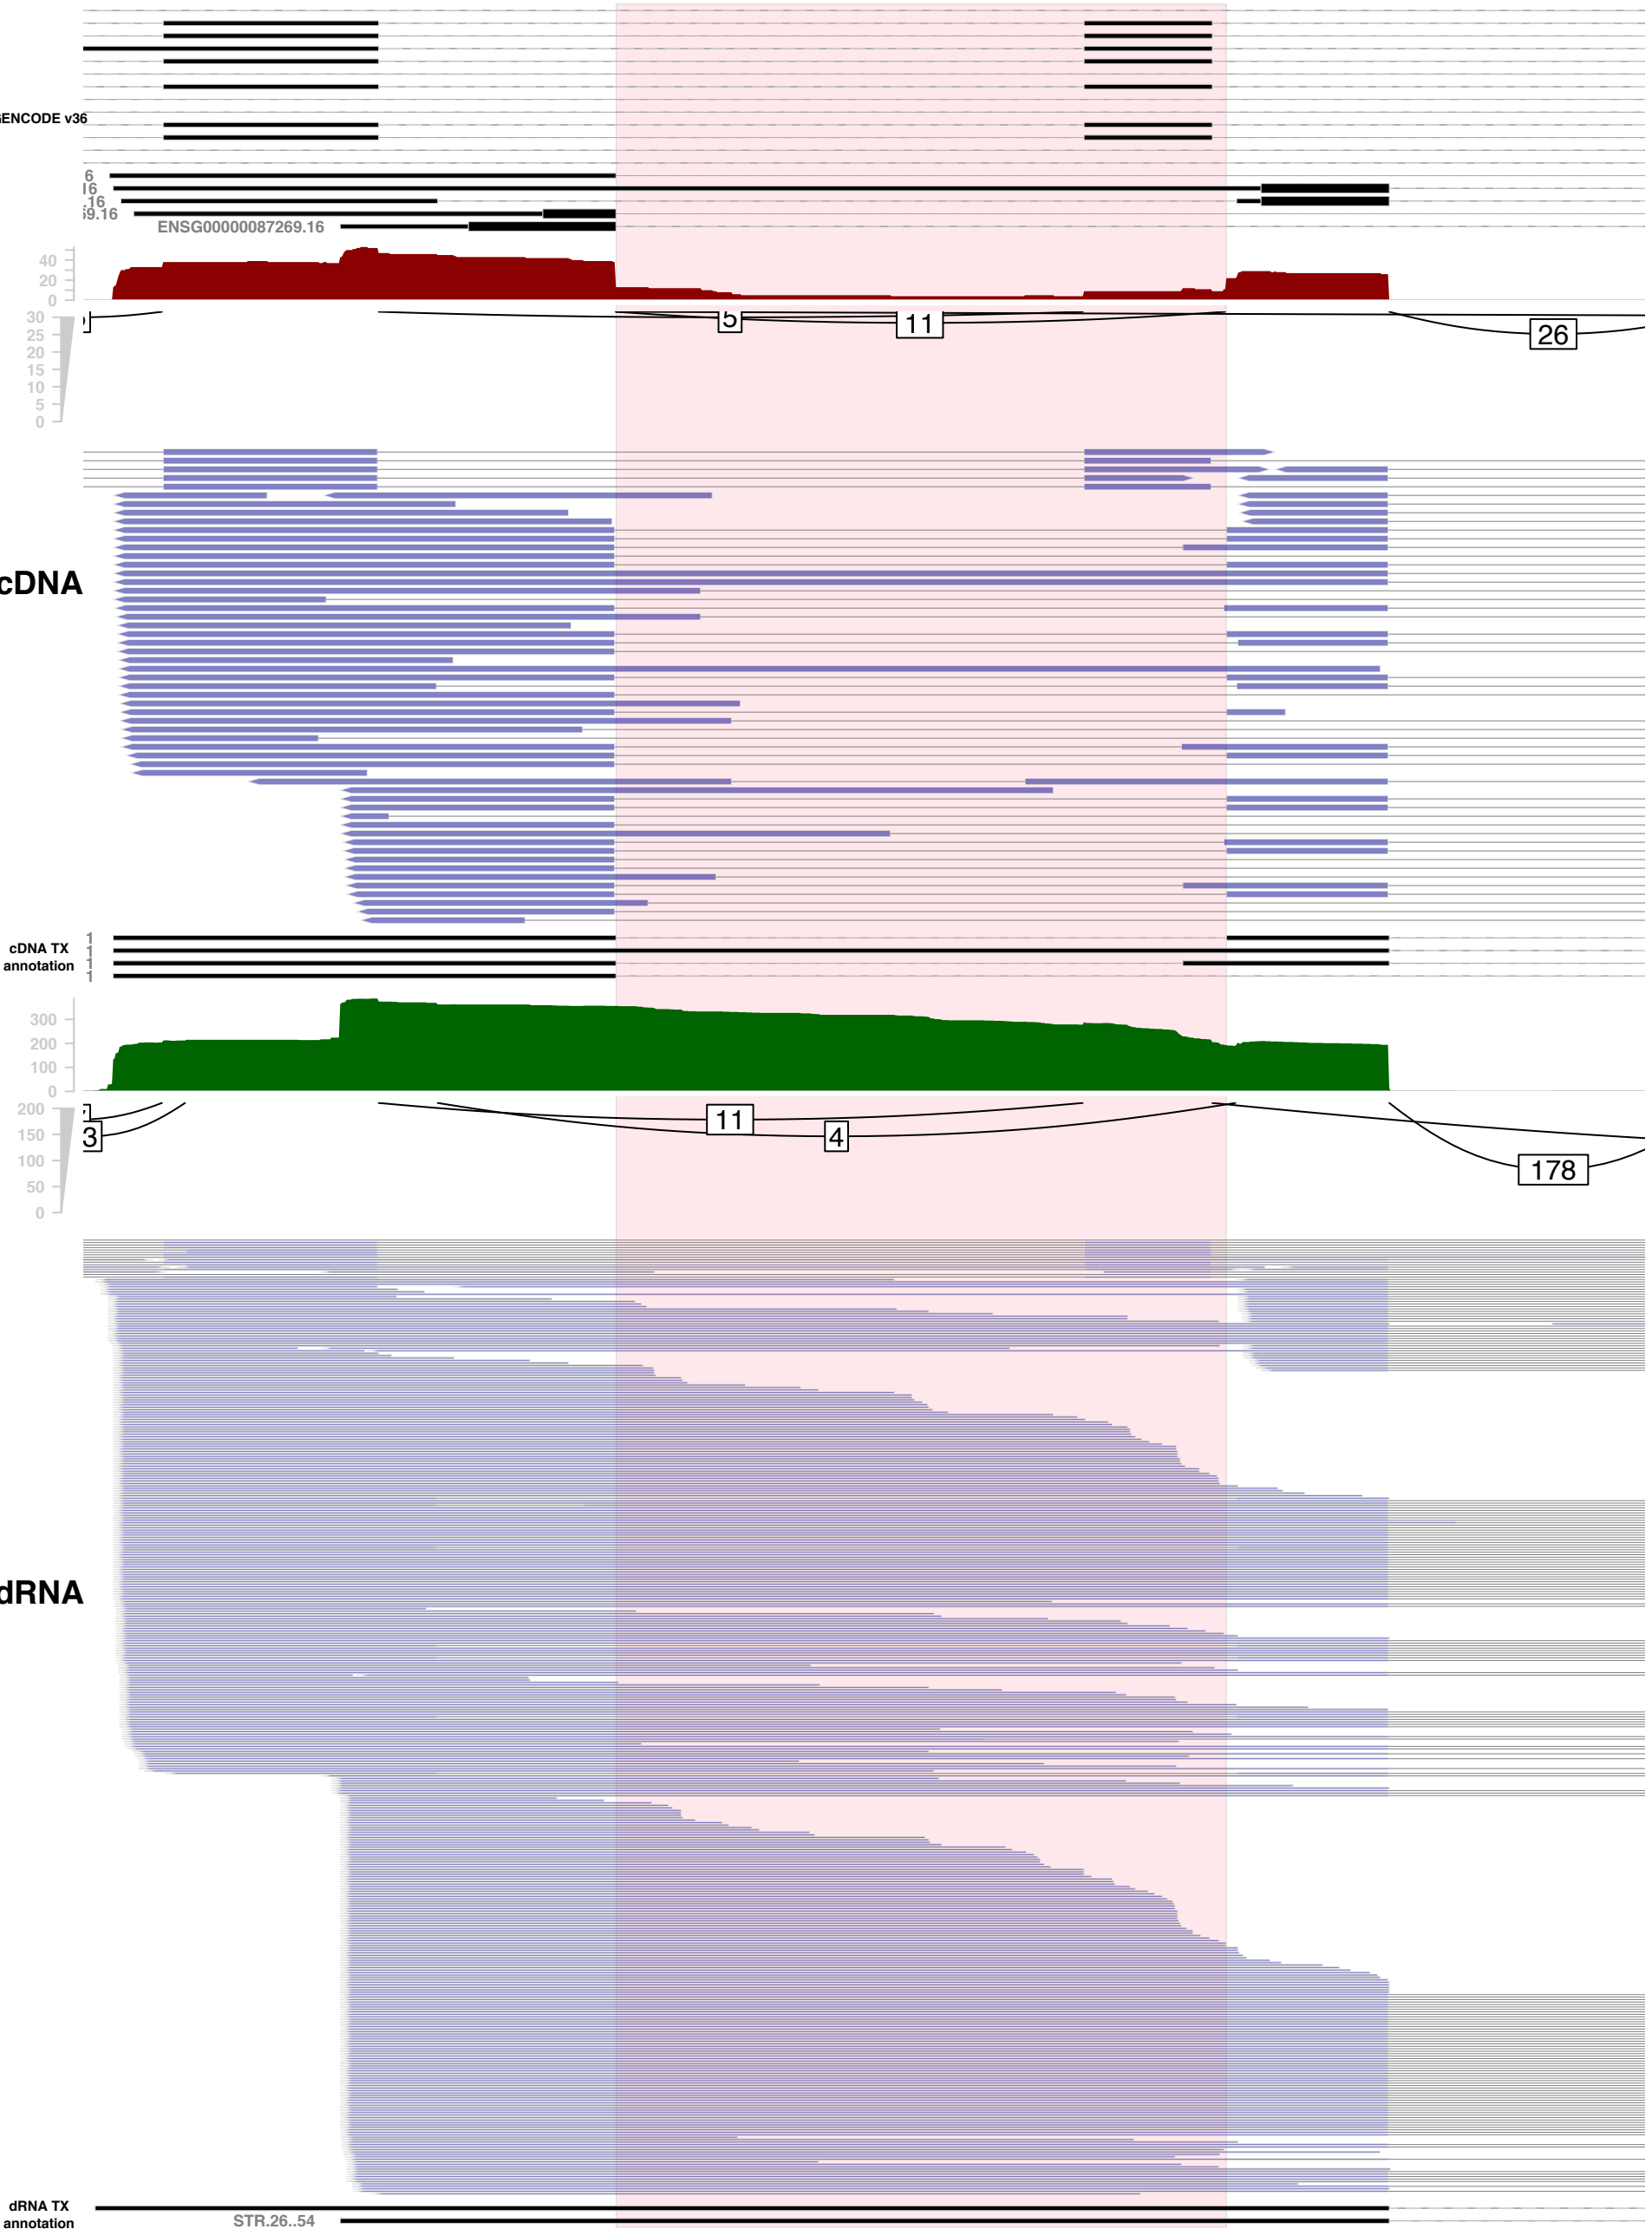

chr5:163437659-163437758:+ CCNG1

Cell line: NA12878

GENCODE v36

ENSG00000113328.19  
ENSG00000113328.19  
ENSG00000113328.19  
ENSG00000113328.19  
ENSG00000113328.19  
ENSG00000113328.19  
ENSG00000113328.19

250  
200  
150  
100  
50  
0

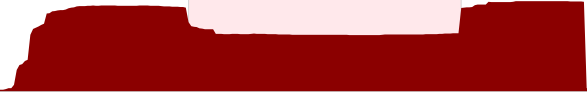

300  
250  
200  
150  
100  
50  
0

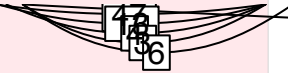

cDNA

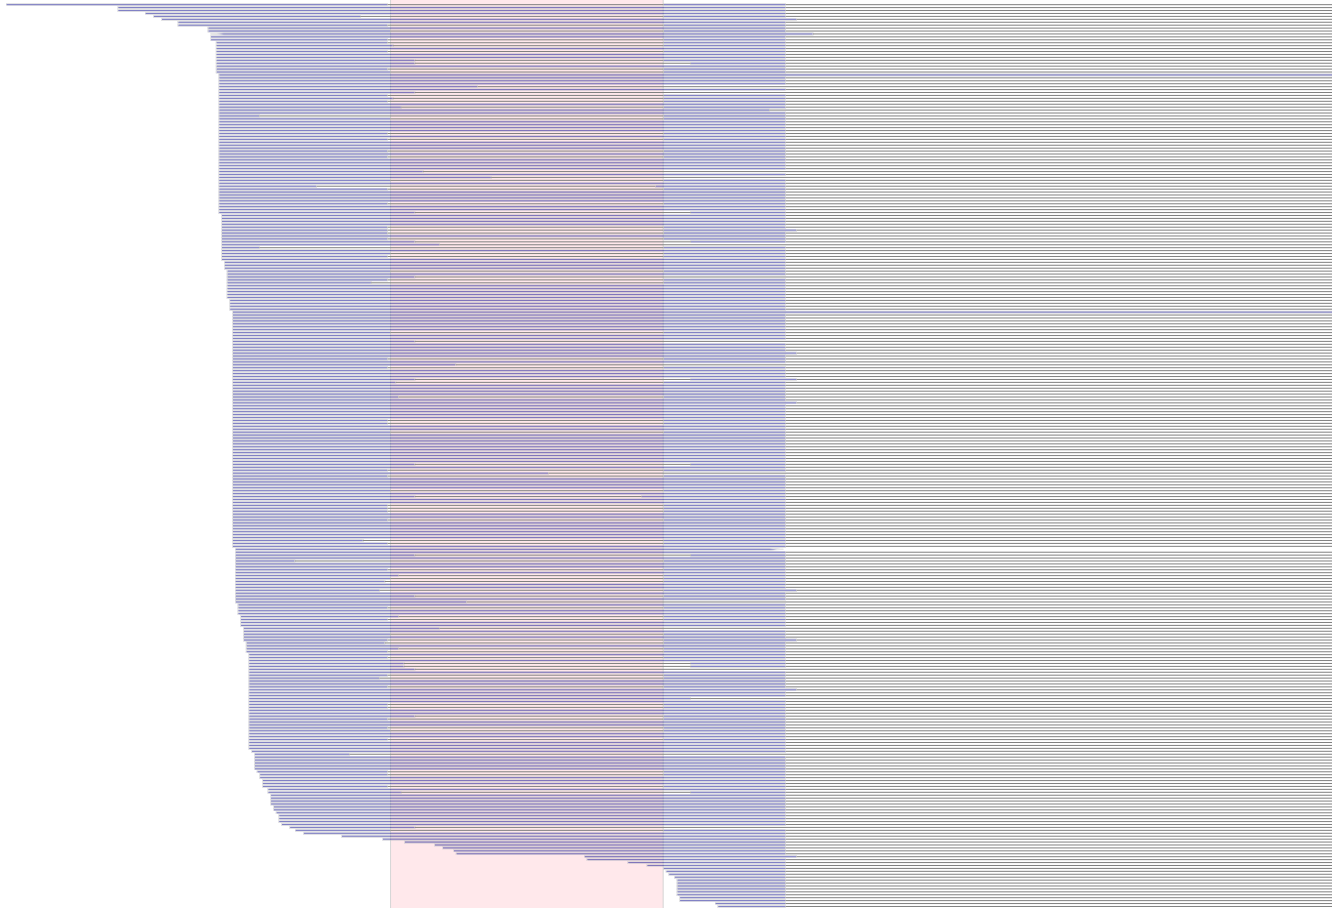

cDNA TX annotation

STR.21..142  
STR.21..142  
STR.21..142  
STR.21..142

600  
500  
400  
300  
200  
100  
0

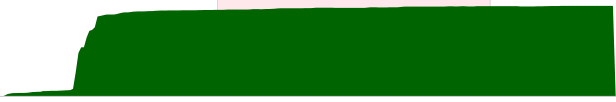

700  
600  
500  
400  
300  
200  
100  
0

dRNA

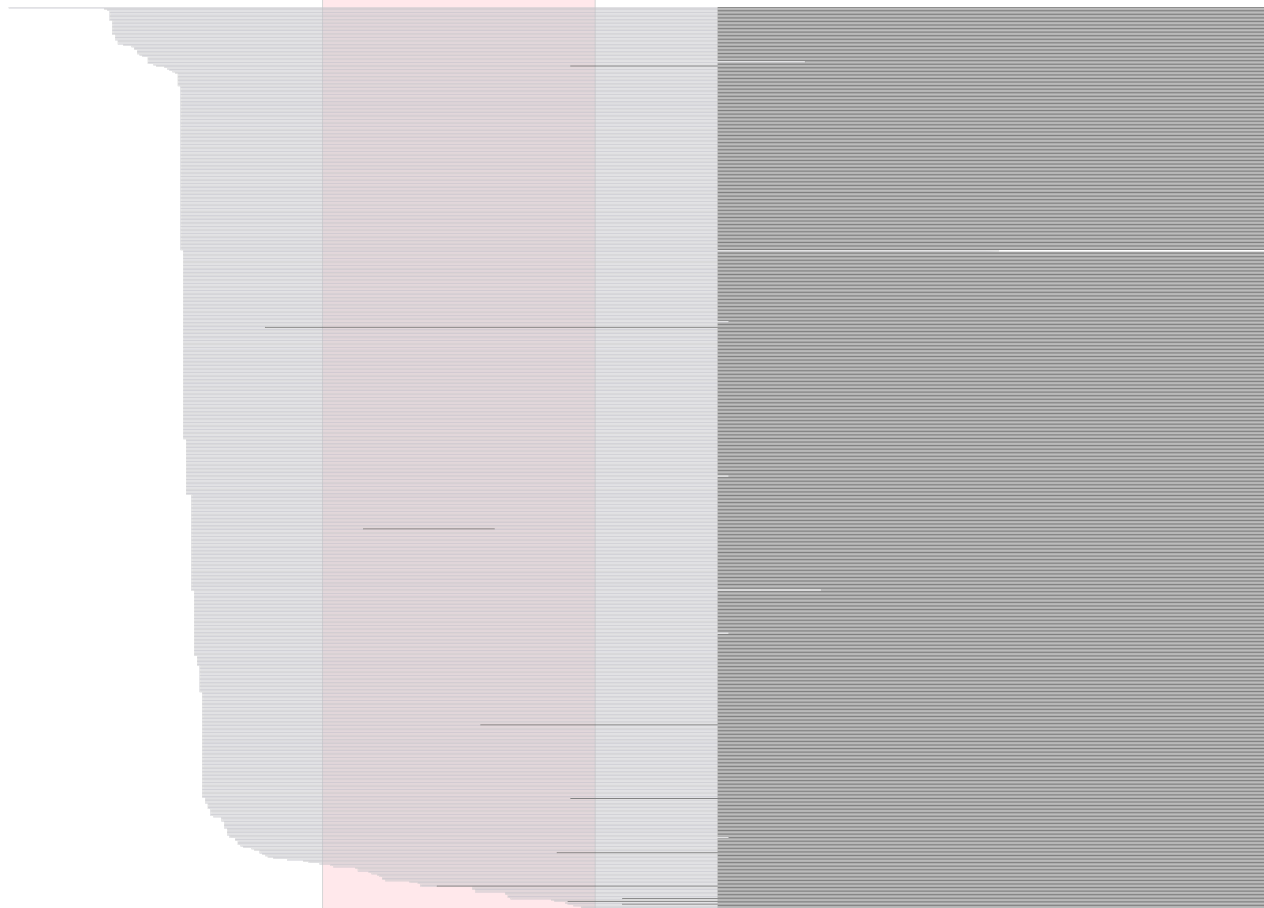

dRNA TX annotation

STR.33..83



chr5:180835052-180835421:+ LINC00847

Cell line: NA12878

Direct repeat sequence: GCCTTC

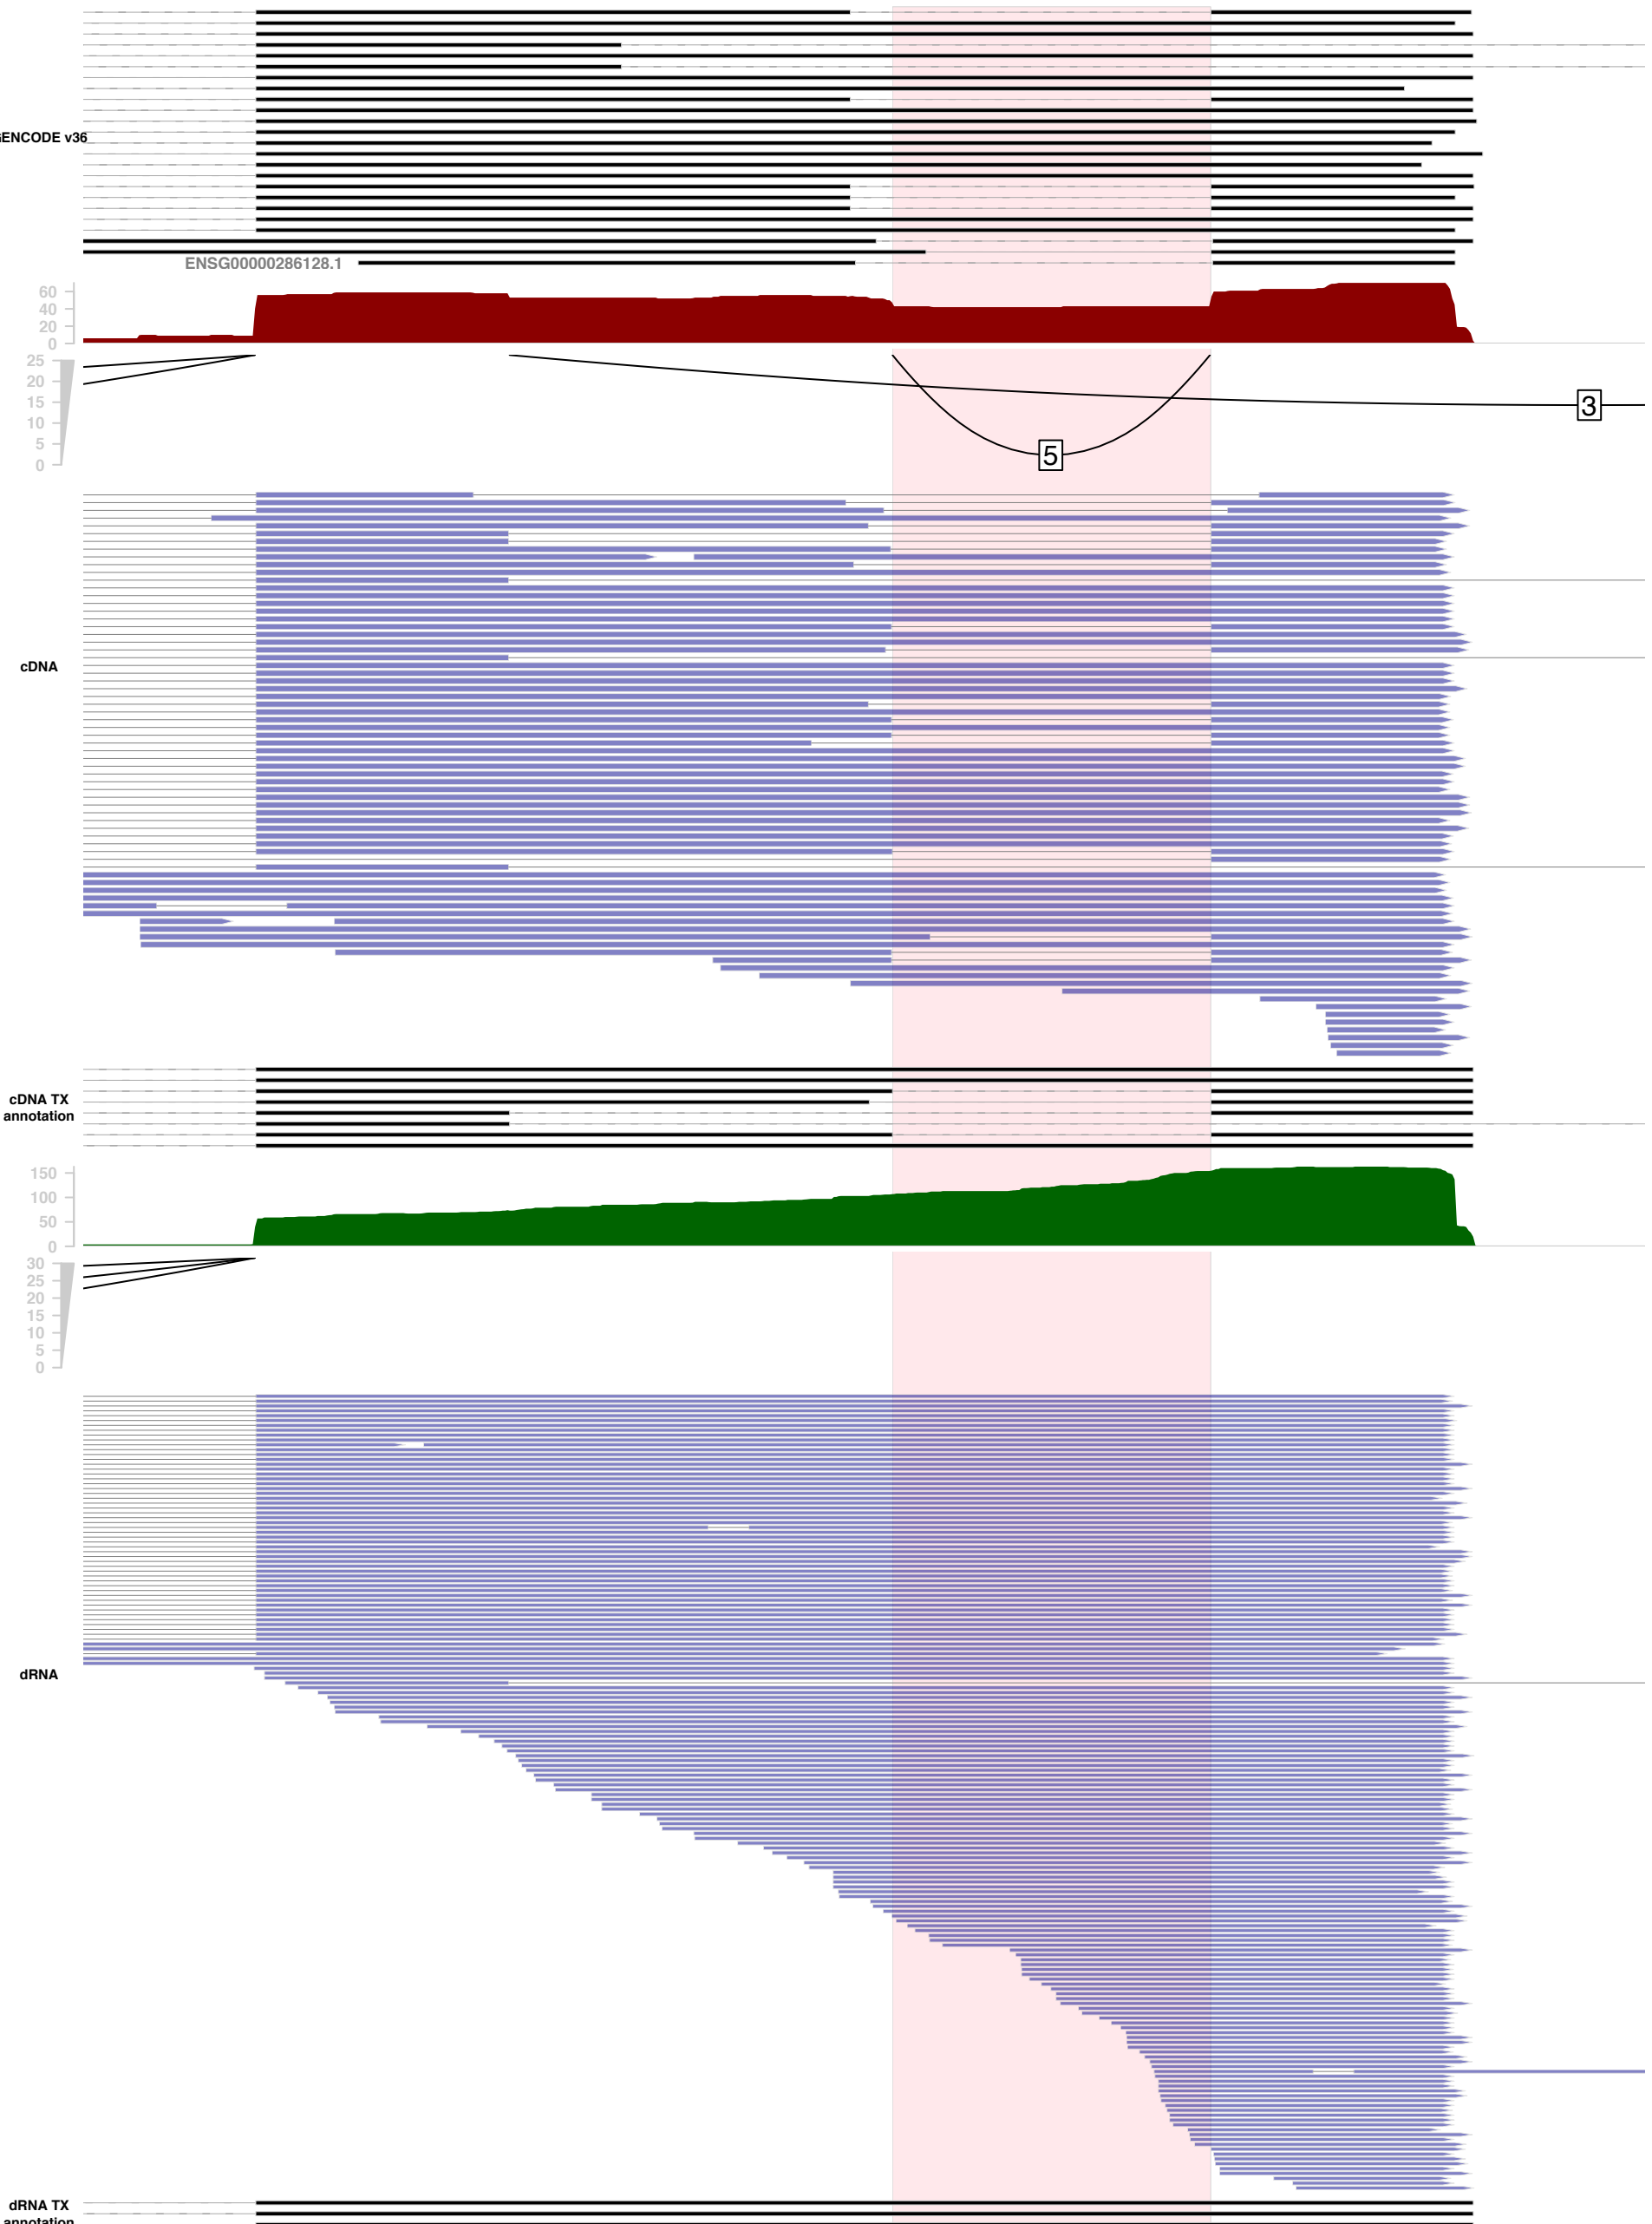

chr6:70588932-70589284:+ SDHAF4

Cell line: NA12878

Direct repeat sequence: GCCT

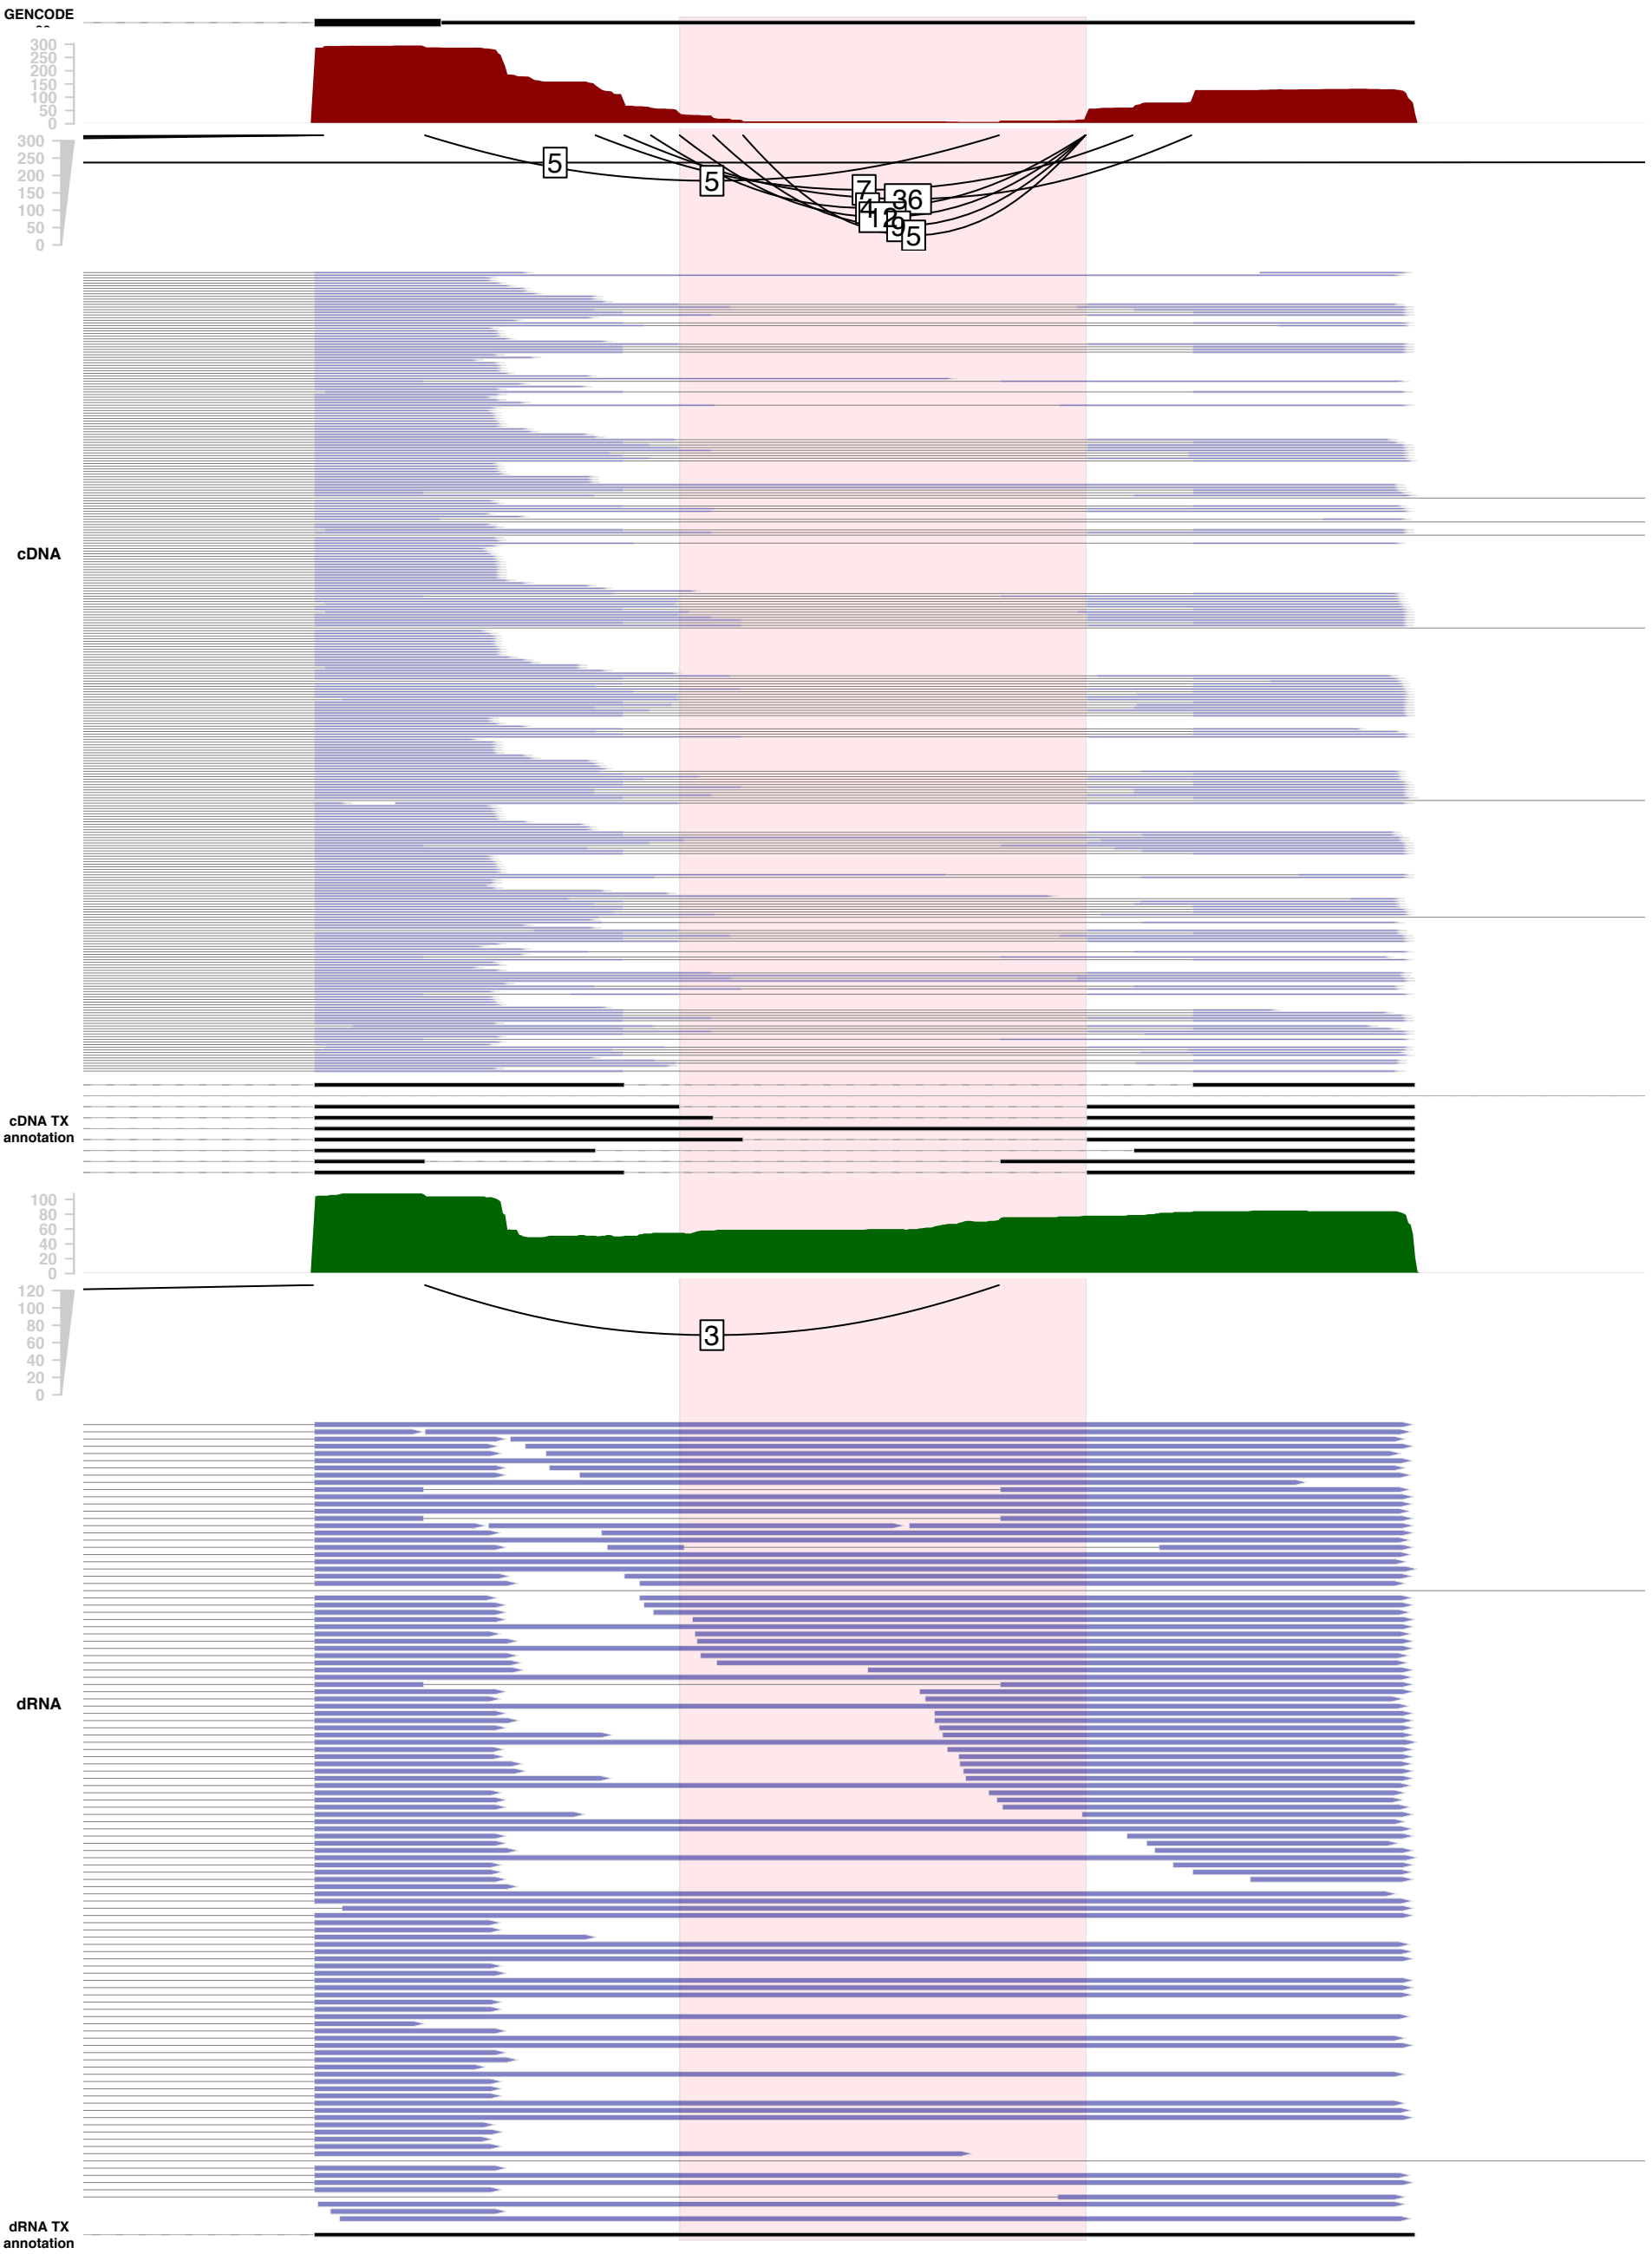

chr6:70588987-70589284:+ SDHAF4

Cell line: NA12878

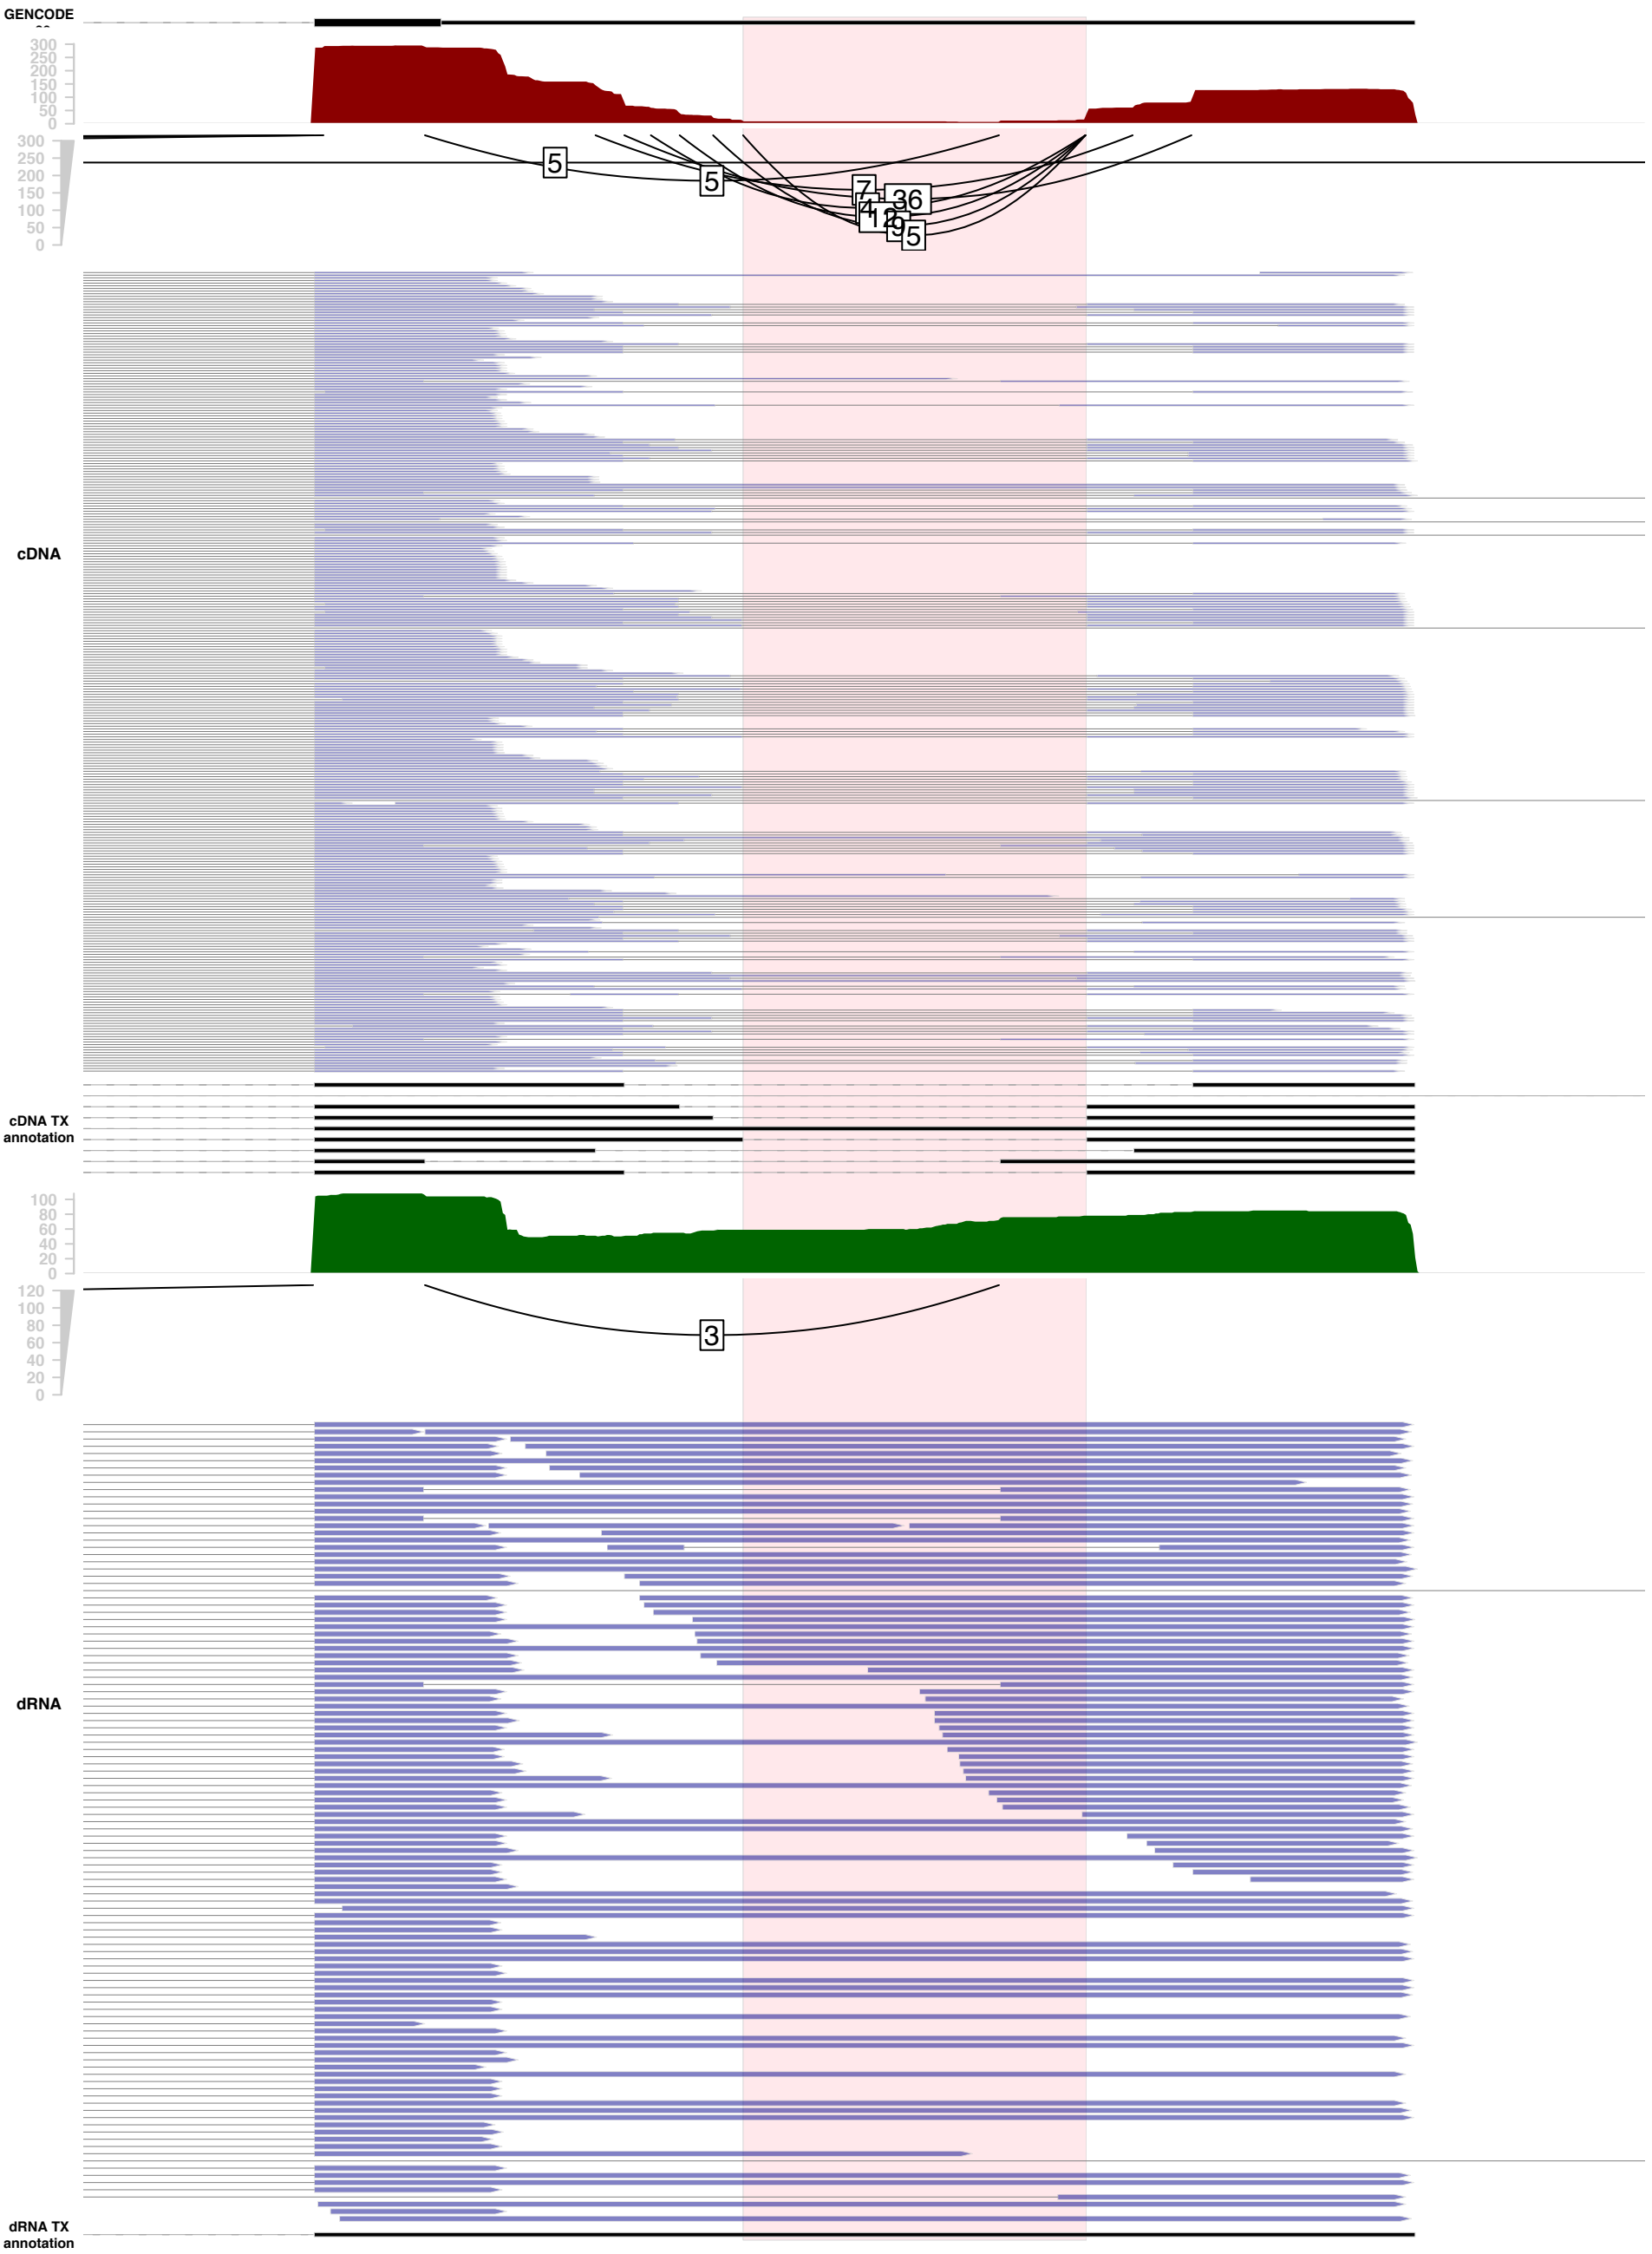

chr6:70588859-70589325:+ SDHAF4

Cell line: NA12878

Direct repeat sequence: TGGCT

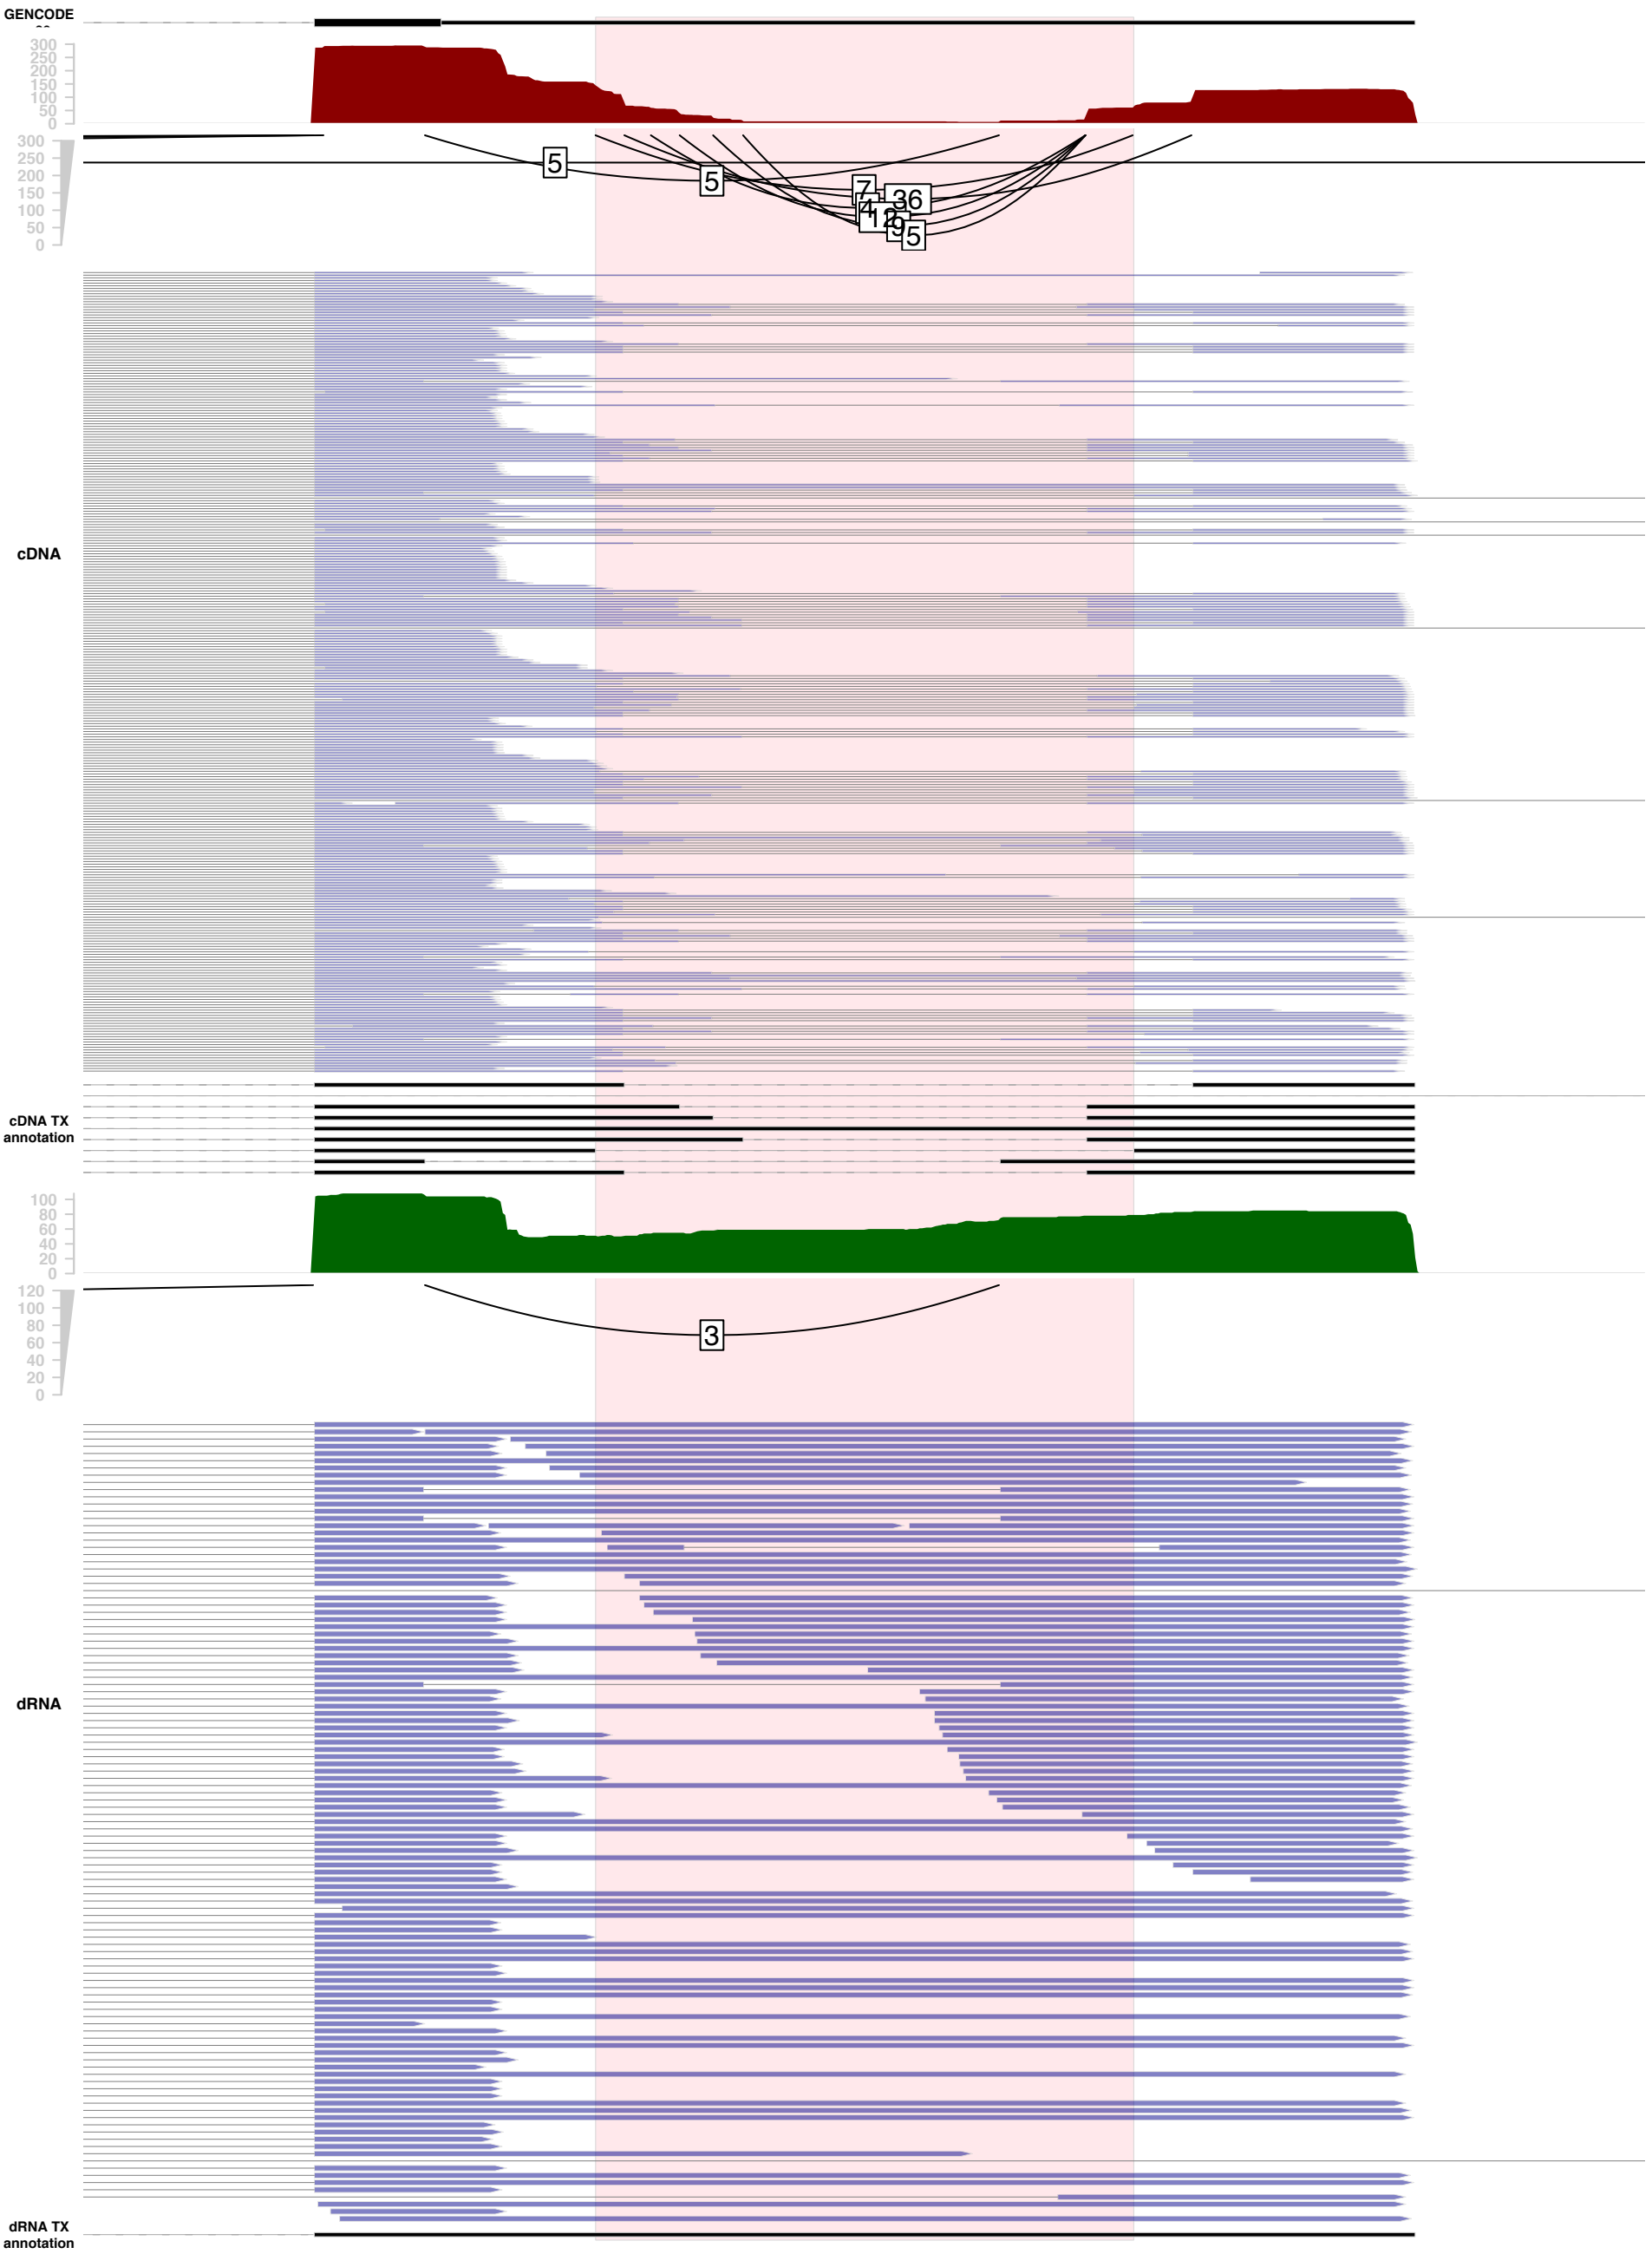

chr6:170584410-170584525:- PDCD2

Cell line: NA12878

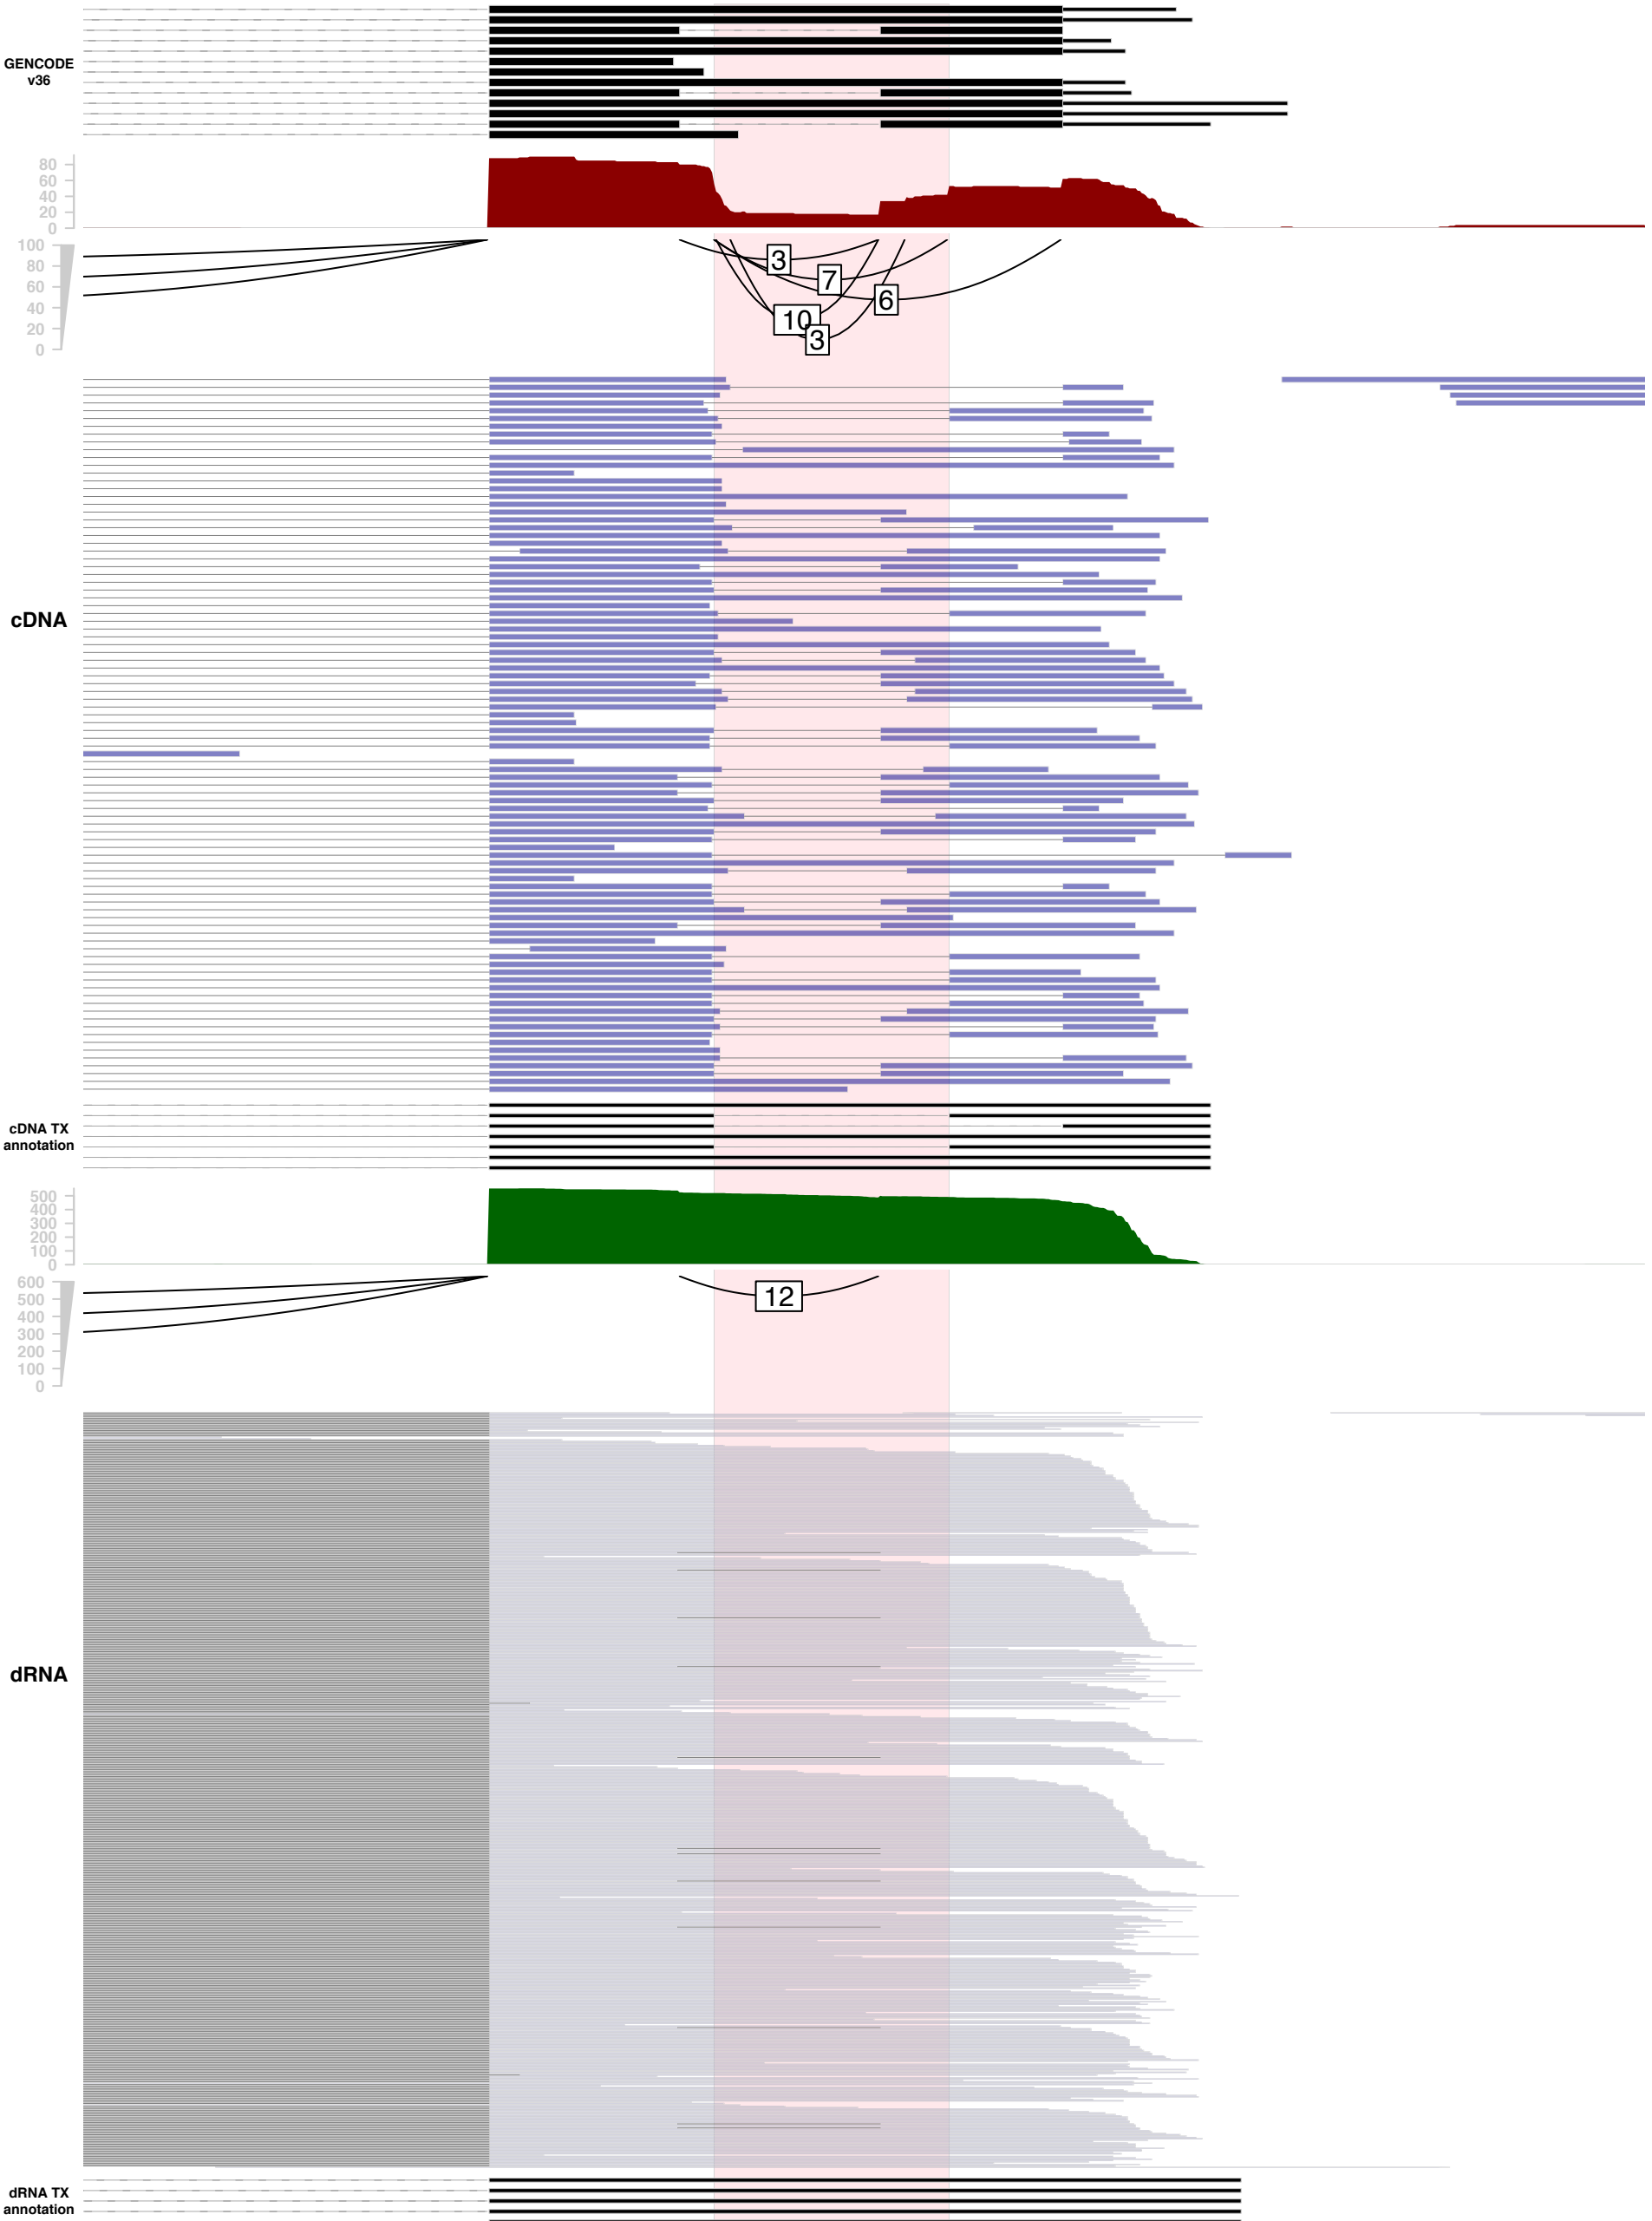

chr6:170584410-170584581:- PDCD2

Cell line: NA12878

Direct repeat sequence: CCCGC

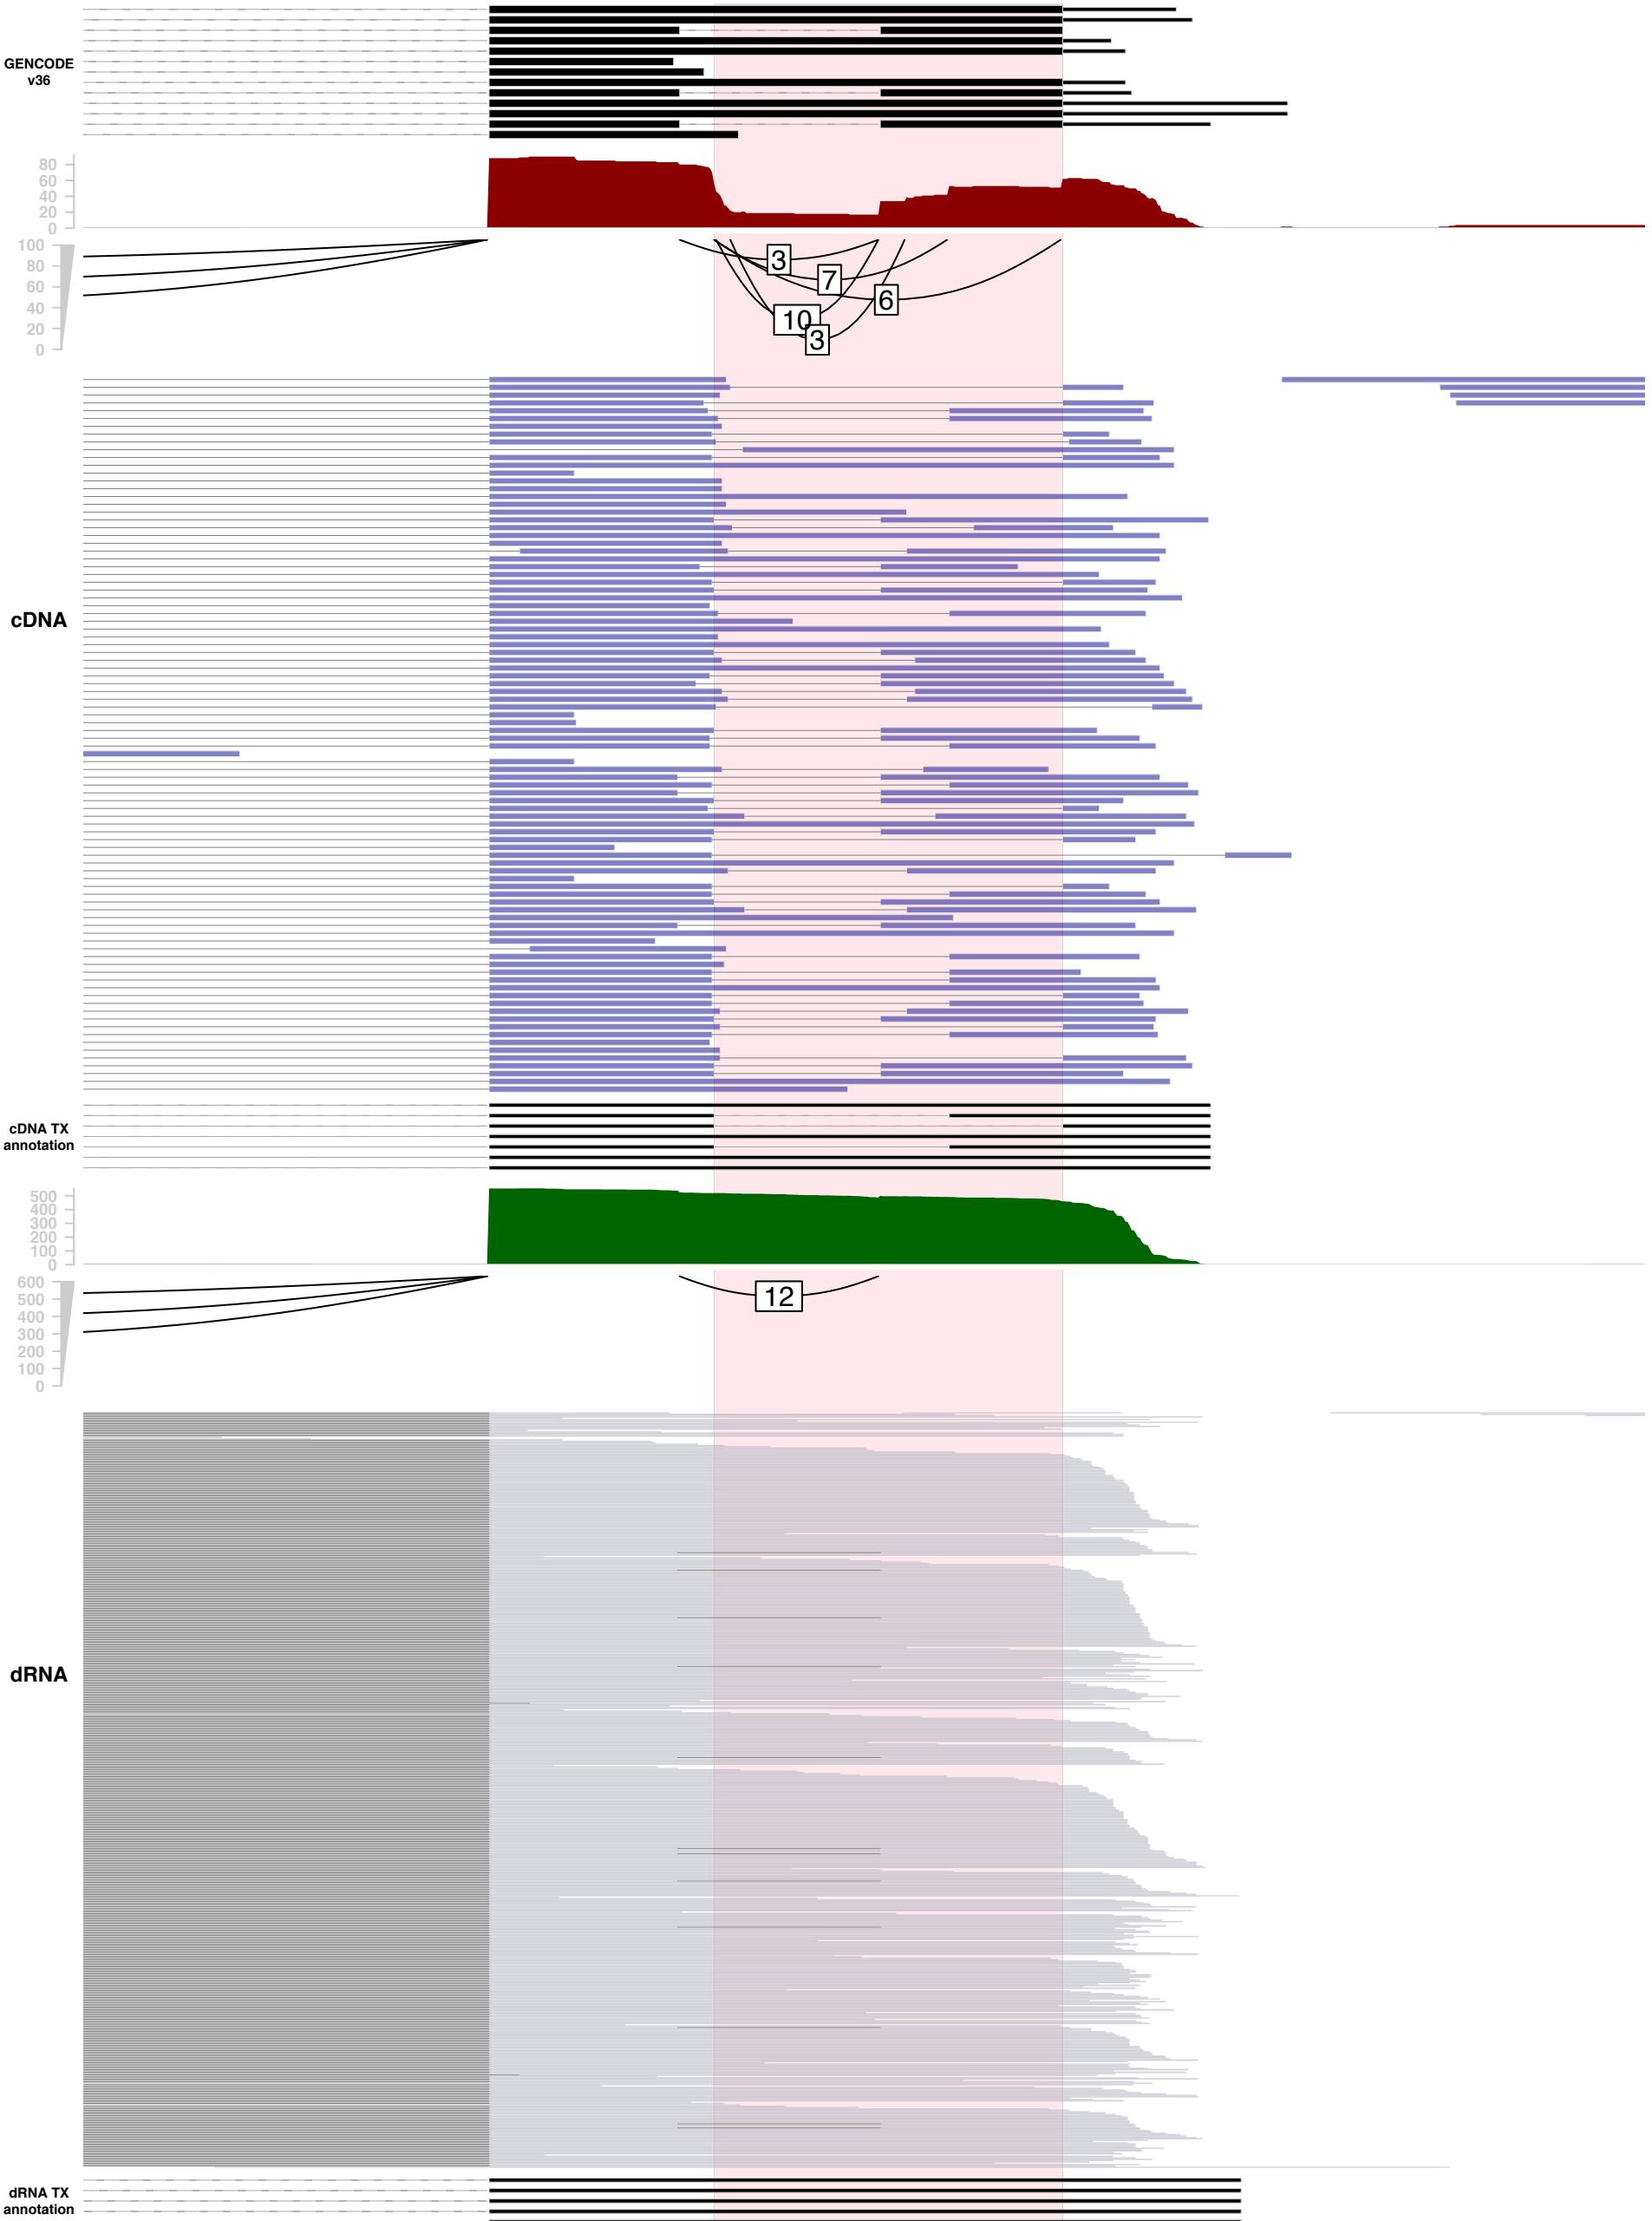

chr14:21460346-21460977:- RAB2B

Cell line: NA12878

Direct repeat sequence: CCTCC

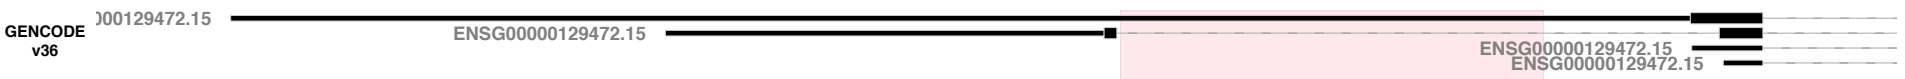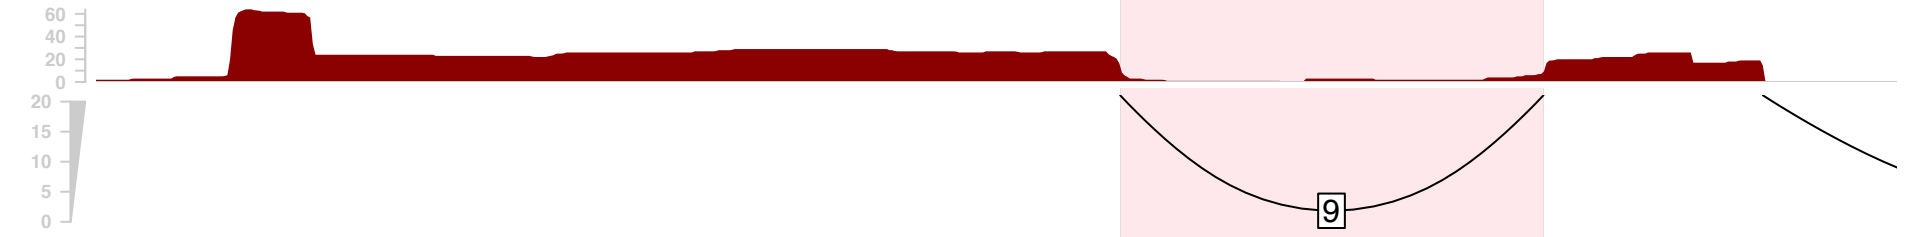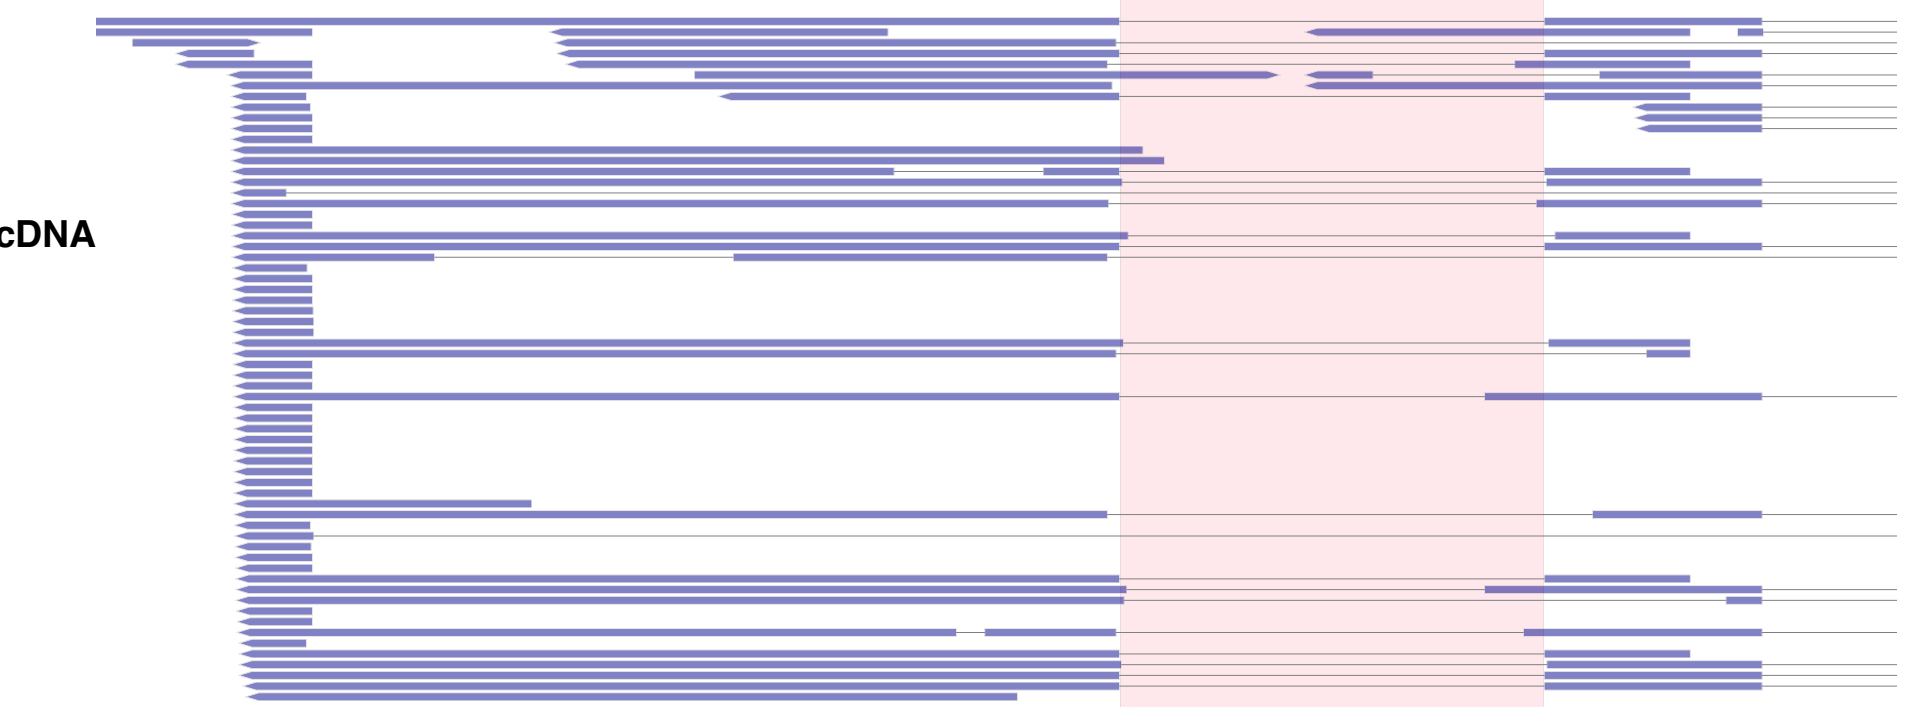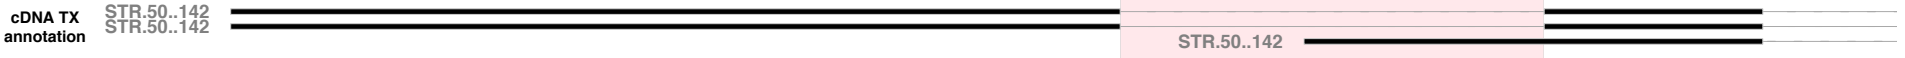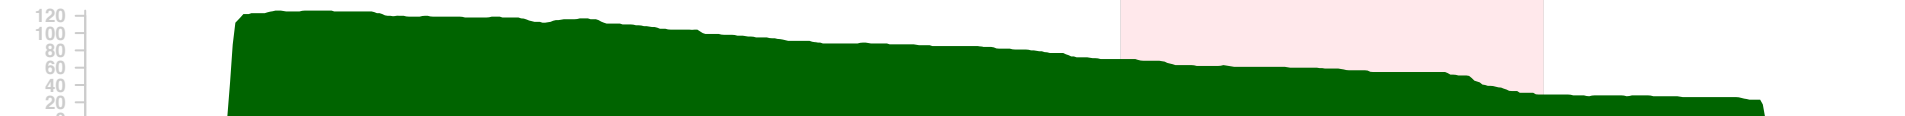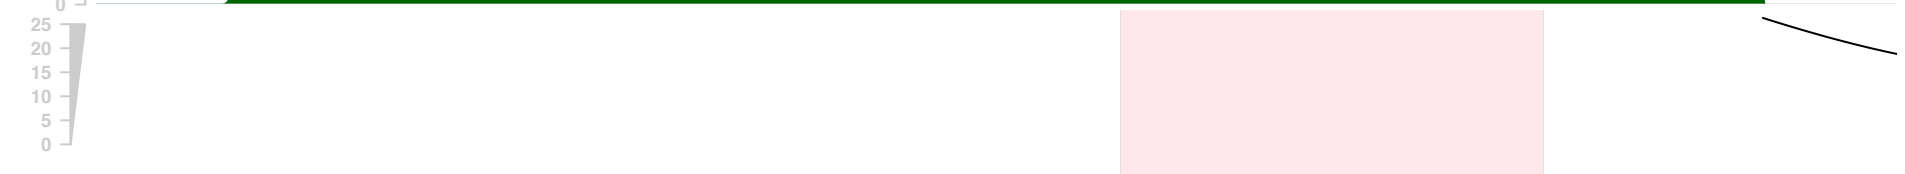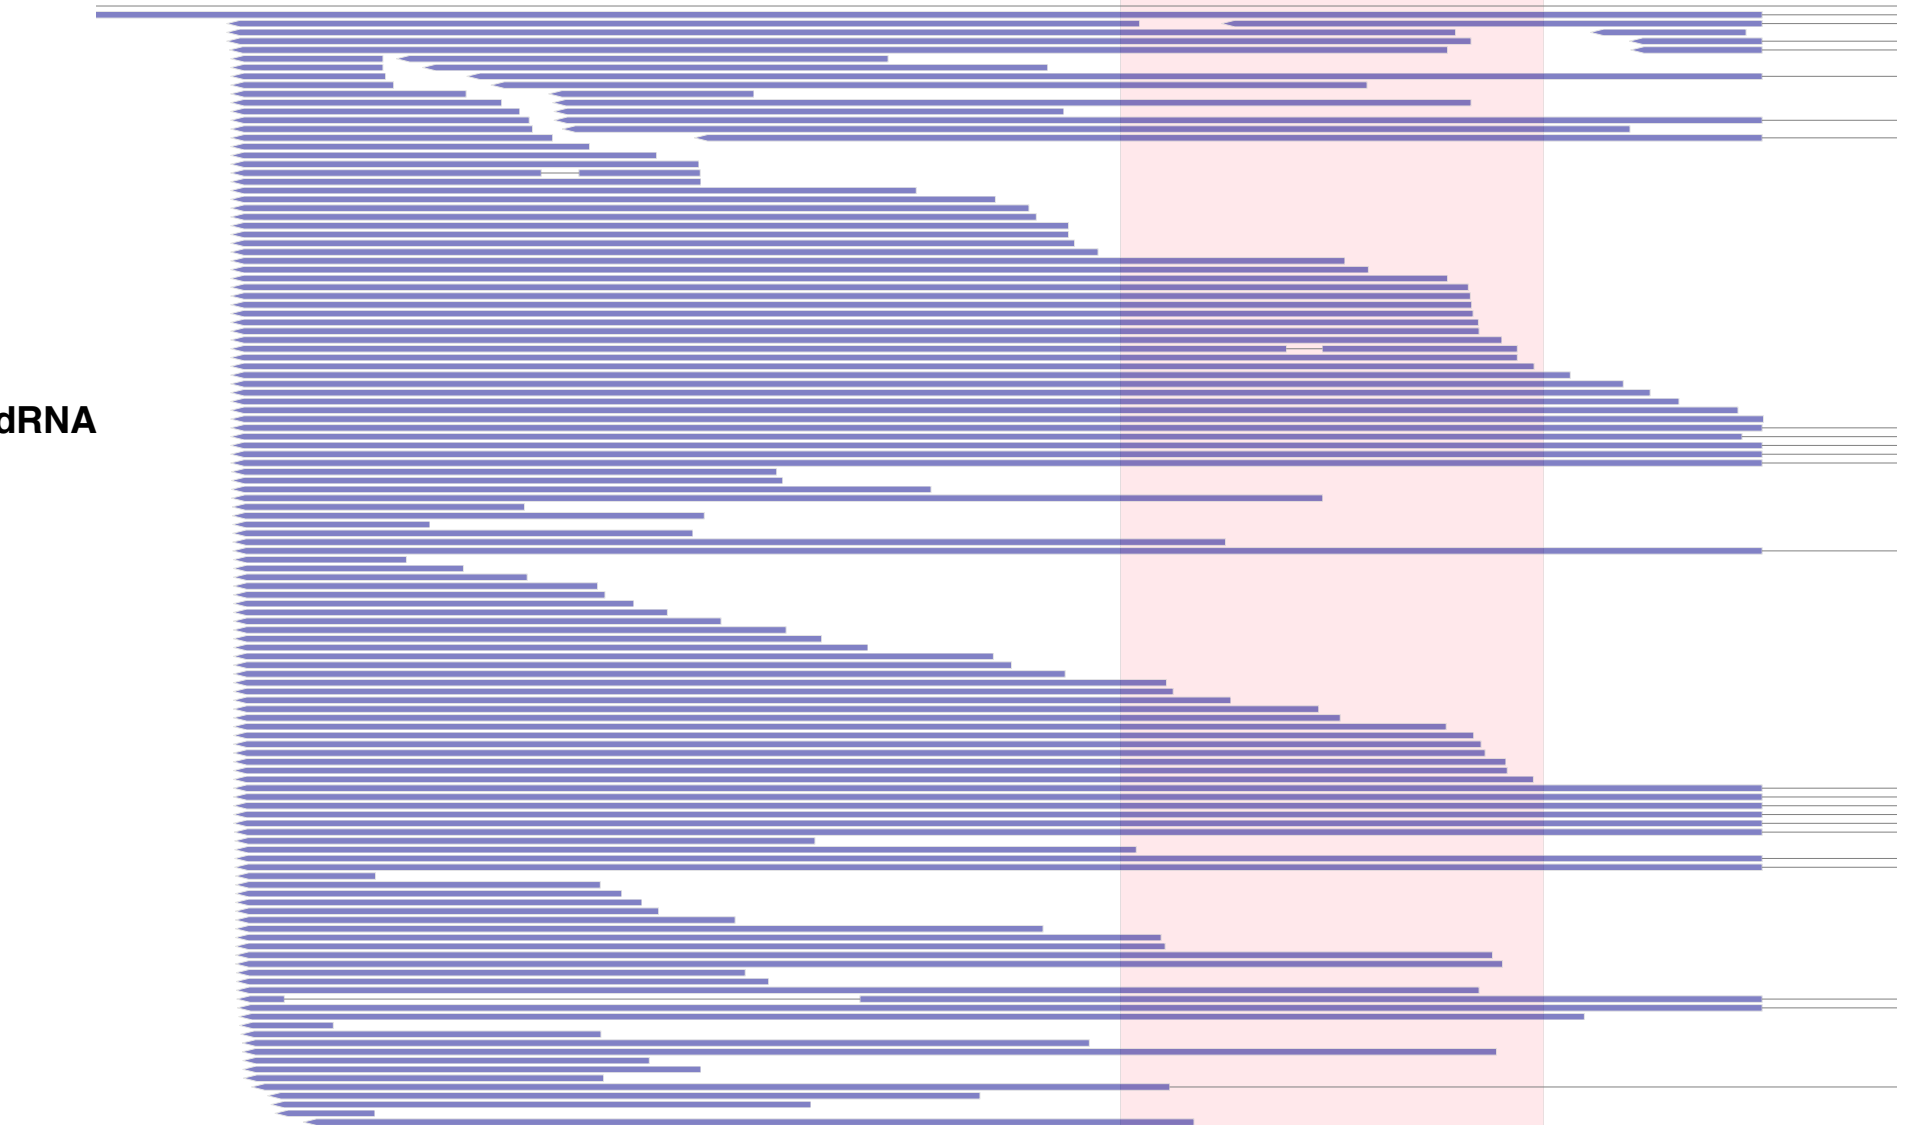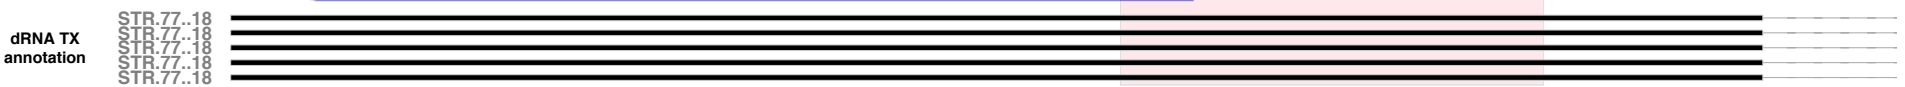





chr16:28932452-28932581:+ CD19

Cell line: NA12878

Direct repeat sequence: CAGCCTGG

GENCODE v36

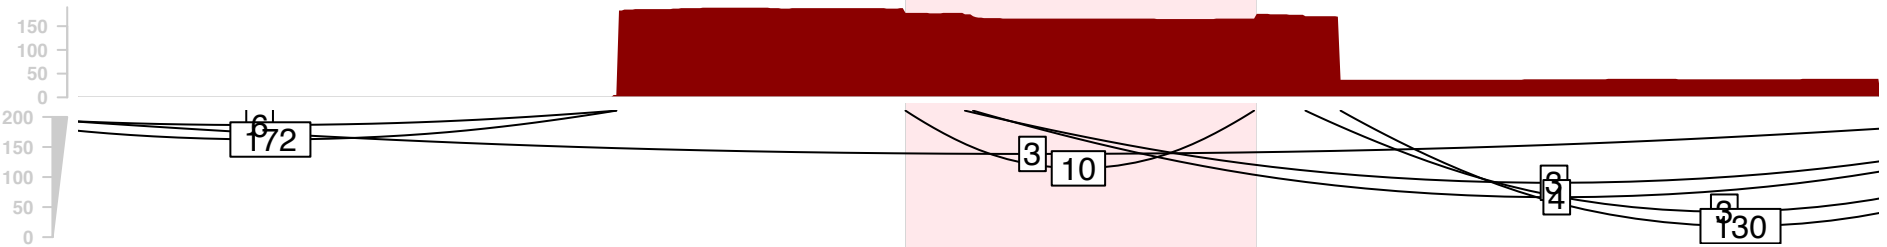

cDNA

cDNA TX annotation

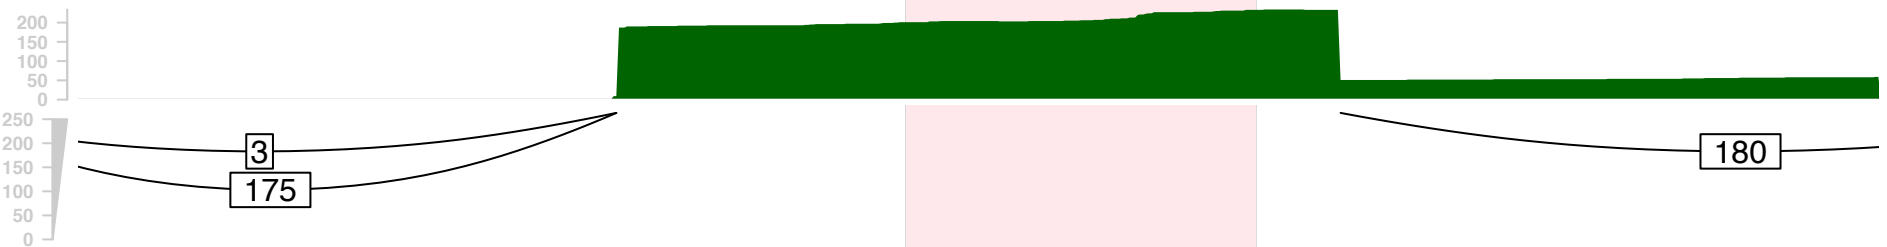

dRNA

dRNA TX annotation

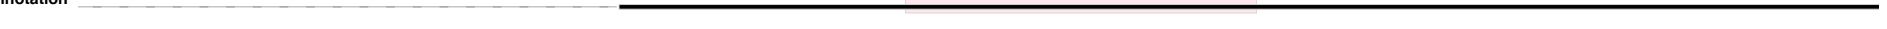

chr17:3663563-3663657:- TAX1BP3,P2RX5-TAX1BP3

Cell line: NA12878

Direct repeat sequence: GACCG

GENCODE v36  
ENSG00000213977.8  
ENSG00000213977.8  
ENSG00000257950.3

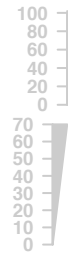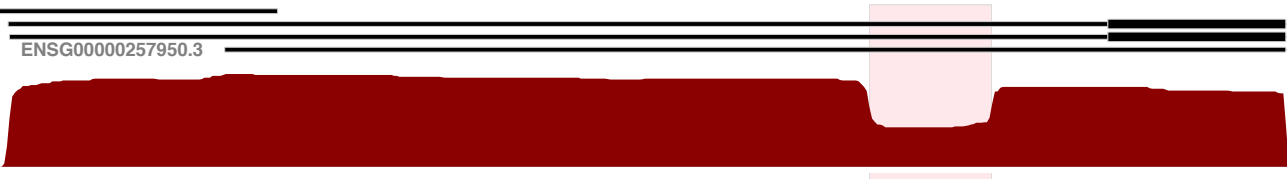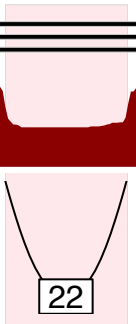

68

cDNA

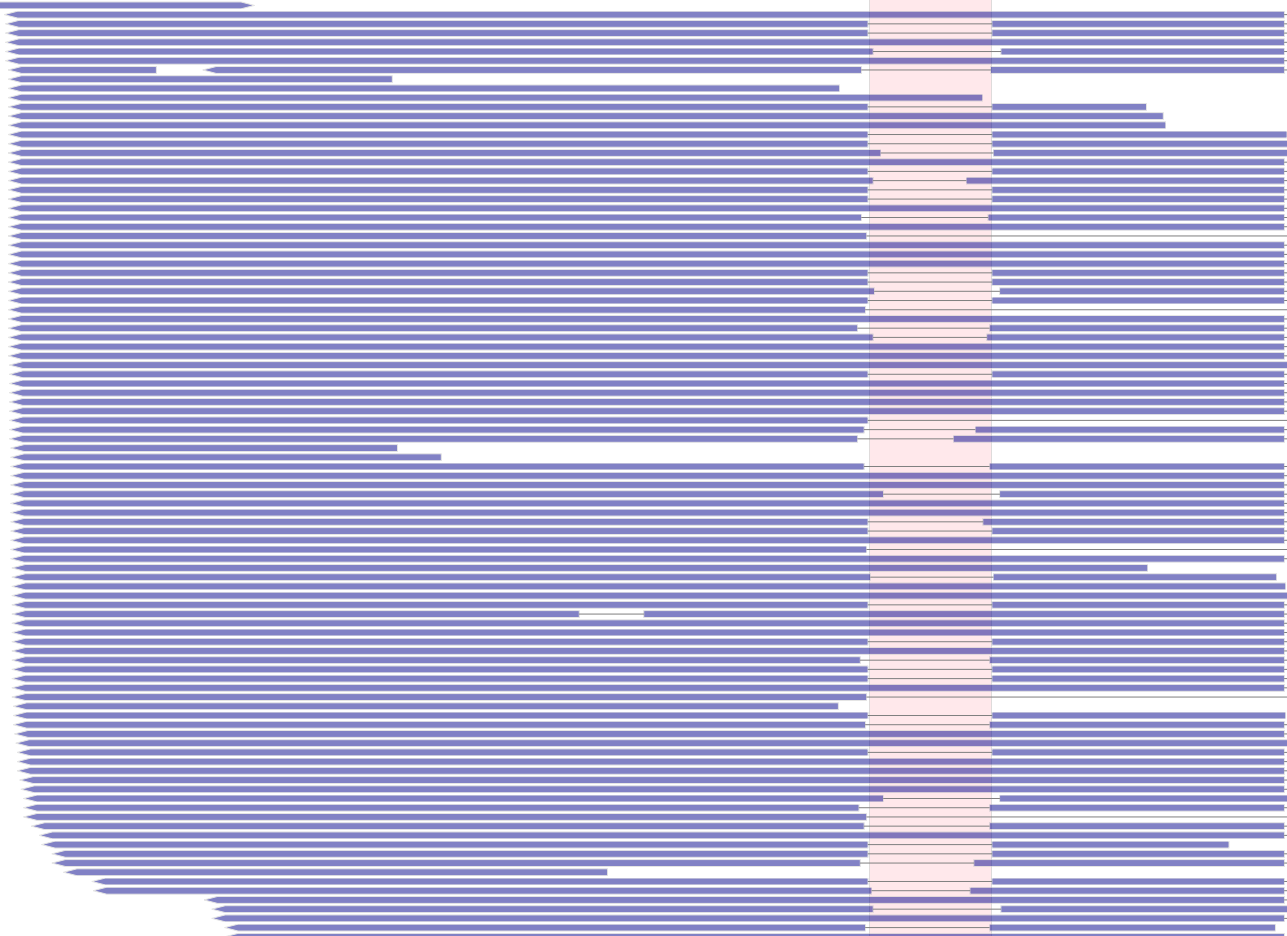

cDNA TX annotation

STR:58..450

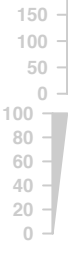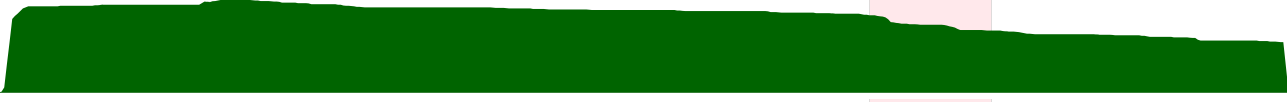

96

dRNA

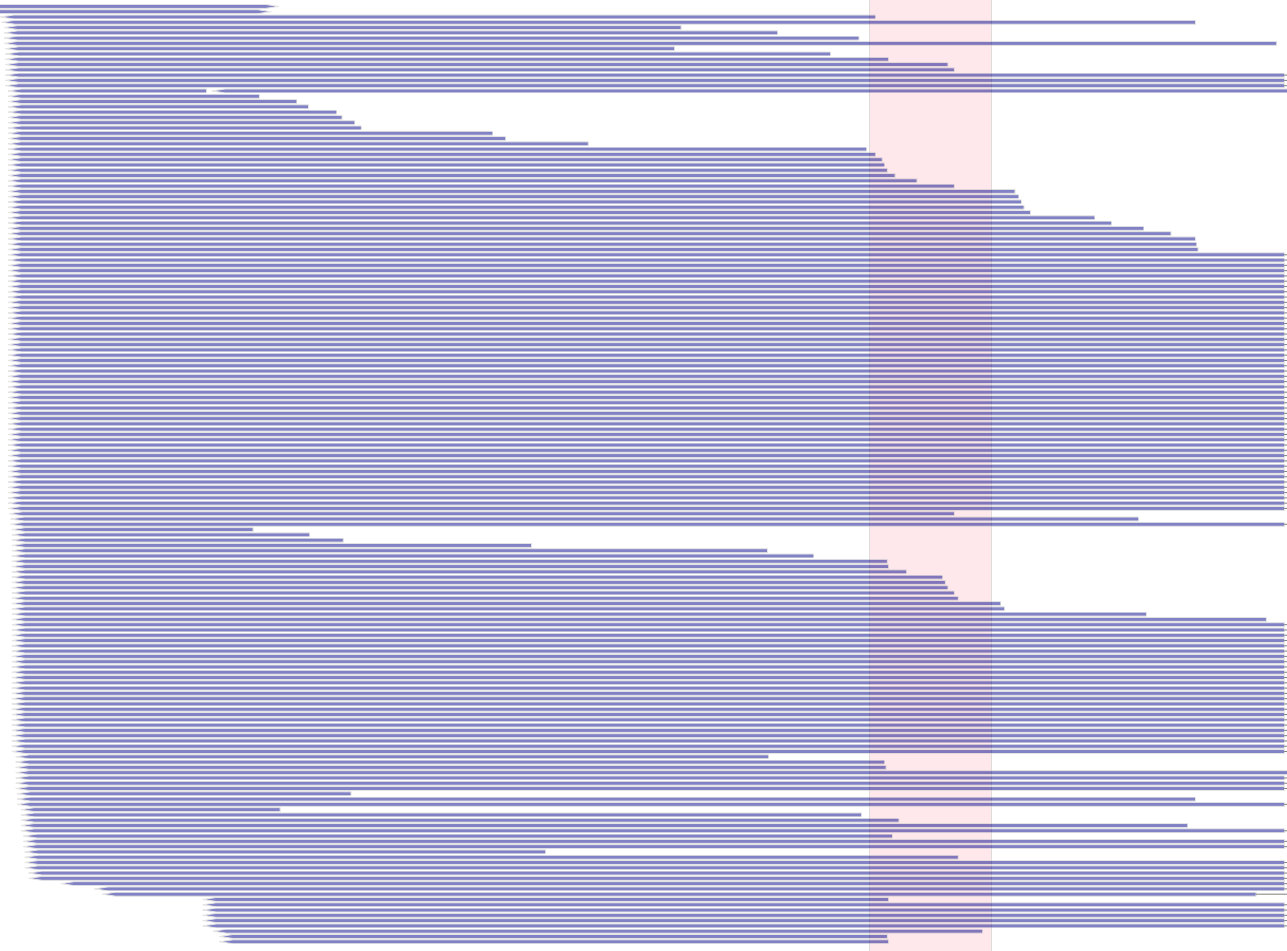

dRNA TX annotation

STR:90..80
