# Supplementary material for: Direct long-read RNA sequencing identifies a subset of questionable exitrons likely arising from reverse transcription artifacts
Source: Genome Biol. 2021 Jun 28;22:190. doi: 10.1186/s13059-021-02411-1 (PMC8240250; doi:10.1186/s13059-021-02411-1)
Supplement: Supplementary file 3 — Additional file 3: Table S1. Putative falsitrons detected from Oxford Nanopore Technologies (ONT) sequencing data for the five commonly used cell lines A549, HCT116, HepG2, K562 and MCF-7, as well as the B-lymphoblastoid cell line GM12878. [file 13059_2021_2411_MOESM3_ESM.xlsx]

## Sheet: Legend
Table S1. Putative falsitrons detected from Oxford Nanopore Technologies (ONT) sequencing data for the five commonly used cell lines A549, HCT116, HepG2, K562 and MCF-7 as well as the B-lymphoblastoid cell line GM12878. Information on 100 putative candidate events corresponding to 57 unique falsitrons in 43 genes, for which “spliced” reads were present in the cDNA-seq but completely absent in the…

## Sheet: Putative falsitrons
cell line	ONT library type	falsitron coordinates (hg38)	exon coordinates (hg38)	read count	junction read count	junction ratio	falsitron length	repeat length	repeat sequence	gene name
A549	cDNA	chr1:28335161-28335708:+	chr1:28334417-28335968:+	47	5	0.106383	548	4	CAGC	MED18
A549	cDNA	chr5:163437659-163437758:+	chr5:163437578-163437804:+	54	7	0.12963	100	0		CCNG1
A549	cDNA	chr8:47976979-47977736:+	chr8:47976686-47978162:+	41	6	0.146341	758	0		MCM4
A549	cDNA	chr12:75501816-75501921:+	chr12:75498824-75501934:+	49	17	0.346939	106	0		GLIPR1
A549	cDNA	chr15:63121977-63122084:+	chr15:63121796-63122228:+	42	5	0.119048	108	0		LACTB
A549	cDNA	chr17:3663563-3663657:-	chr17:3662891-3663885:-	517	75	0.145068	95	5	GACCG	TAX1BP3,P2RX5-TAX1BP3
A549	cDNA	chr19:35746759-35746910:+	chr19:35746708-35747010:+	2056	93	0.0452335	152	4	CCTG	PSENEN,AC002398.9
A549	cDNA	chr19:35746853-35746910:+	chr19:35746708-35747010:+	2066	46	0.0222652	58	0		PSENEN,AC002398.9
A549	dcDNA	chr4:56459858-56460922:+	chr4:56459372-56461361:+	58	8	0.137931	1065	0		PAICS
Hct116	cDNA	chr1:8012958-8013358:-	chr1:8011725-8014396:-	49	5	0.102041	401	7	GGGAAGC	ERRFI1
Hct116	cDNA	chr1:28335161-28335708:+	chr1:28334417-28335967:+	246	22	0.0894309	548	4	CAGC	MED18
Hct116	cDNA	chr5:163437659-163437758:+	chr5:163437558-163437804:+	133	18	0.135338	100	0		CCNG1
Hct116	cDNA	chr6:170584410-170584525:-	chr6:170584299-170584723:-	39	5	0.128205	116	0		PDCD2
Hct116	cDNA	chr7:157139165-157139221:+	chr7:157138890-157139338:+	16	5	0.3125	57	4	GCCC	UBE3C
Hct116	cDNA	chr8:47976979-47977736:+	chr8:47976686-47977928:+	113	11	0.0973451	758	0		MCM4
Hct116	cDNA	chr14:31447249-31447389:-	chr14:31446023-31448454:-	33	11	0.333333	141	6	CAGCAC	RP11-176H8.1,DTD2
Hct116	cDNA	chr19:35746759-35746910:+	chr19:35746708-35747519:+	954	58	0.0607966	152	4	CCTG	PSENEN,AC002398.9
Hct116	cDNA	chr19:35746853-35746910:+	chr19:35746708-35747519:+	956	28	0.0292887	58	0		PSENEN,AC002398.9
Hct116	cDNA	chr20:58891551-58891720:+	chr20:58890645-58891865:+	45	6	0.133333	170	5	CCGCC	GNAS
Hct116	cDNA	chr22:37807089-37807354:+	chr22:37805238-37807436:+	215	14	0.0651163	266	0		H1F0
Hct116	cDNA	chr16:69167124-69168881:+	chr16:69167075-69169049:+	312	22	0.0705128	1758	4	ATGA	UTP4
Hct116	dcDNA	chr1:8012958-8013358:-	chr1:8011725-8014396:-	354	31	0.0875706	401	7	GGGAAGC	ERRFI1
Hct116	dcDNA	chr1:28335286-28335574:+	chr1:28334417-28335967:+	468	15	0.0320513	289	4	CCCA	MED18
Hct116	dcDNA	chr1:28334920-28335708:+	chr1:28334417-28335967:+	468	30	0.0641026	789	6	CAGCTA	MED18
Hct116	dcDNA	chr1:28335161-28335708:+	chr1:28334417-28335967:+	468	24	0.0512821	548	4	CAGC	MED18
Hct116	dcDNA	chr2:207754757-207754935:+	chr2:207753588-207756175:+	18	5	0.277778	179	4	CAGC	CCNYL1
Hct116	dcDNA	chr4:176331078-176331197:+	chr4:176328198-176332245:+	141	6	0.0425532	120	4	CAGC	SPCS3
Hct116	dcDNA	chr5:126625543-126625746:+	chr5:126624575-126627253:+	59	6	0.101695	204	4	GCTG	PHAX
Hct116	dcDNA	chr5:163437659-163437758:+	chr5:163437558-163437804:+	518	82	0.158301	100	0		CCNG1
Hct116	dcDNA	chr6:42887275-42888373:+	chr6:42887160-42889901:+	284	45	0.158451	1099	0		RPL7L1
Hct116	dcDNA	chr6:170584411-170584491:-	chr6:170584299-170584723:-	464	30	0.0646552	81	0		PDCD2
Hct116	dcDNA	chr8:95245505-95246254:-	chr8:95243174-95247770:-	12	5	0.416667	750	4	CAGC	C8orf37
Hct116	dcDNA	chr8:47976979-47977736:+	chr8:47976686-47977928:+	429	61	0.142191	758	0		MCM4
Hct116	dcDNA	chr9:125149260-125149583:-	chr9:125149127-125149921:-	241	23	0.0954357	324	4	AGCA	PPP6C
Hct116	dcDNA	chr11:60842626-60842700:+	chr11:60842057-60842882:+	372	13	0.0349462	75	8	GGTCAGCA	CCDC86
Hct116	dcDNA	chr12:49351611-49353978:+	chr12:49351317-49357544:+	17	5	0.294118	2368	0		DNAJC22
Hct116	dcDNA	chr12:100626865-100627488:+	chr12:100623562-100628286:+	18	5	0.277778	624	0		GAS2L3
Hct116	dcDNA	chr12:132721275-132721854:+	chr12:132720678-132722737:+	98	16	0.163265	580	4	CTTG	PGAM5
Hct116	dcDNA	chr13:21374501-21374897:-	chr13:21372548-21376655:-	58	10	0.172414	397	4	CAGC	ZDHHC20
Hct116	dcDNA	chr14:21460346-21460977:-	chr14:21459020-21461303:-	34	7	0.205882	632	5	CCTCC	RAB2B
Hct116	dcDNA	chr14:31447249-31447389:-	chr14:31446023-31448454:-	84	18	0.214286	141	6	CAGCAC	RP11-176H8.1,DTD2
Hct116	dcDNA	chr15:74843795-74844892:-	chr15:74843728-74845217:-	283	20	0.0706714	1098	16	CCCCTCTATGTACAAA	SCAMP2
Hct116	dcDNA	chr17:3663567-3663637:-	chr17:3662892-3663885:-	452	60	0.132743	71	0		TAX1BP3,P2RX5-TAX1BP3
Hct116	dcDNA	chr1:220057918-220058829:-	chr1:220057728-220058992:-	137	5	0.0364964	912	0		BPNT1
Hct116	dcDNA	chr17:47118517-47118594:-	chr17:47117702-47121017:-	87	8	0.091954	78	0		CDC27
Hct116	dcDNA	chr17:57680745-57680893:+	chr17:57679549-57684689:+	40	7	0.175	149	4	CCTG	MSI2
Hct116	dcDNA	chr19:35746853-35746910:+	chr19:35746708-35747519:+	788	20	0.0253807	58	0		PSENEN,AC002398.9
Hct116	dcDNA	chr19:35746759-35746910:+	chr19:35746708-35747519:+	788	17	0.0215736	152	4	CCTG	PSENEN,AC002398.9
Hct116	dcDNA	chr20:45883263-45884986:+	chr20:45882532-45885268:+	25	7	0.28	1724	8	CTCCAGCC	ZSWIM1
HepG2	cDNA	chr1:8012958-8013358:-	chr1:8011725-8014396:-	40	5	0.125	401	7	GGGAAGC	ERRFI1
HepG2	cDNA	chrM:8766-9064:+	chrM:8362-9219:+	701	5	0.00713267	299	0
HepG2	cDNA	chr5:163437659-163437758:+	chr5:163437607-163437804:+	112	10	0.0892857	100	0		CCNG1
HepG2	cDNA	chr12:75501816-75501921:+	chr12:75498824-75502040:+	21	12	0.571429	106	0		GLIPR1
HepG2	cDNA	chr14:31447249-31447389:-	chr14:31446032-31448454:-	34	5	0.147059	141	6	CAGCAC	RP11-176H8.1,DTD2
HepG2	cDNA	chr17:3663563-3663657:-	chr17:3662892-3663885:-	114	18	0.157895	95	5	GACCG	TAX1BP3,P2RX5-TAX1BP3
HepG2	dcDNA	chr1:28334920-28335708:+	chr1:28334417-28335967:+	15	7	0.466667	789	6	CAGCTA	MED18
HepG2	dcDNA	chr5:163437659-163437758:+	chr5:163437607-163437804:+	122	8	0.0655738	100	0		CCNG1
K562	cDNA	chr1:28334920-28335708:+	chr1:28334417-28335968:+	134	17	0.126866	789	6	CAGCTA	MED18
K562	cDNA	chr1:28335161-28335708:+	chr1:28334417-28335968:+	134	7	0.0522388	548	4	CAGC	MED18
K562	cDNA	chr5:163437659-163437758:+	chr5:163437545-163437804:+	264	40	0.151515	100	0		CCNG1
K562	cDNA	chr6:170584411-170584491:-	chr6:170584299-170584678:-	65	10	0.153846	81	0		PDCD2
K562	cDNA	chr8:47976979-47977736:+	chr8:47976686-47978162:+	54	12	0.222222	758	0		MCM4
K562	cDNA	chr9:127908169-127908317:-	chr9:127907879-127908581:-	73	6	0.0821918	149	6	CTCCAC	ST6GALNAC4
K562	cDNA	chr11:6704862-6705515:+	chr11:6704623-6705798:+	55	8	0.145455	654	0
K562	cDNA	chr12:62965697-62965963:+	chr12:62965308-62966043:+	112	7	0.0625	267	6	CAAGAA	RPL14P1
K562	cDNA	chr17:3663563-3663657:-	chr17:3662893-3663885:-	66	13	0.19697	95	5	GACCG	TAX1BP3,P2RX5-TAX1BP3
K562	cDNA	chr19:35746759-35746910:+	chr19:35746708-35747513:+	560	32	0.0571429	152	4	CCTG	PSENEN,AC002398.9
K562	cDNA	chr19:35746853-35746910:+	chr19:35746708-35747513:+	566	10	0.0176678	58	0		PSENEN,AC002398.9
K562	cDNA	chr20:58891551-58891720:+	chr20:58890542-58891865:+	26	5	0.192308	170	5	CCGCC	GNAS
K562	dcDNA	chr5:163437659-163437758:+	chr5:163437545-163437804:+	119	20	0.168067	100	0		CCNG1
K562	dcDNA	chr8:47976979-47977736:+	chr8:47976686-47978162:+	33	8	0.242424	758	0		MCM4
K562	dcDNA	chr4:56459858-56460922:+	chr4:56459372-56461361:+	70	5	0.0714286	1065	0		PAICS
MCF-7	cDNA	chr1:28334920-28335708:+	chr1:28334417-28335967:+	22	5	0.227273	789	6	CAGCTA	MED18
MCF-7	cDNA	chr17:3663563-3663657:-	chr17:3662892-3663885:-	141	9	0.0638298	95	5	GACCG	TAX1BP3,P2RX5-TAX1BP3
MCF-7	cDNA	chr19:35746759-35746910:+	chr19:35746708-35747000:+	904	39	0.0431416	152	4	CCTG	PSENEN,AC002398.9
MCF-7	cDNA	chr19:35746853-35746910:+	chr19:35746708-35747000:+	910	15	0.0164835	58	0		PSENEN,AC002398.9
MCF-7	cDNA	chr20:58891551-58891723:+	chr20:58891364-58891865:+	69	7	0.101449	173	5	CCGCC	GNAS
MCF-7	cDNA	chr22:37807089-37807354:+	chr22:37805205-37807436:+	223	16	0.0717489	266	0		H1F0
MCF-7	dcDNA	chr5:163437659-163437758:+	chr5:163437577-163437804:+	24	5	0.208333	100	0		CCNG1
MCF-7	dcDNA	chr19:35746759-35746910:+	chr19:35746708-35747000:+	95	7	0.0736842	152	4	CCTG	PSENEN,AC002398.9
GM12878	cDNA	chr1:10457345-10459914:-	chr1:10456522-10461702:-	14	5	0.357143	2570	15	AACATAGCAAGACCC	DFFA
GM12878	cDNA	chr19:45703262-45703924:+	chr19:45702904-45704047:+	88	5	0.0568182	663	5	CAGCC	QPCTL
GM12878	cDNA	chr20:18487692-18488637:-	chr20:18487314-18489990:-	12	6	0.5	946	4	CATG	RBBP9
GM12878	cDNA	chr2:37202365-37204573:+	chr2:37201863-37204743:+	300	5	0.0166667	2209	6	CAGCCA	CEBPZOS
GM12878	cDNA	chr2:37202149-37204539:+	chr2:37201863-37204743:+	300	10	0.0333333	2391	0		CEBPZOS
GM12878	cDNA	chrX:119583452-119584366:+	chrX:119583127-119584430:+	94	14	0.148936	915	5	ATGTA	UBE2A
GM12878	cDNA	chr2:113204982-113205613:+	chr2:113201158-113205796:+	94	6	0.0638298	632	0		PSD4
GM12878	cDNA	chr4:56459858-56460922:+	chr4:56459372-56461361:+	93	8	0.0860215	1065	0		PAICS
GM12878	cDNA	chr4:2938328-2938803:-	chr4:2938113-2938930:-	41	11	0.268293	476	4	CTGG	NOP14
GM12878	cDNA	chr5:163437659-163437758:+	chr5:163437544-163437804:+	285	47	0.164912	100	0		CCNG1
GM12878	cDNA	chr5:180835052-180835421:+	chr5:180834312-180835726:+	64	5	0.078125	370	6	GCCTTC	LINC00847
GM12878	cDNA	chr6:70588932-70589284:+	chr6:70588615-70589569:+	414	12	0.0289855	353	4	GCCT	SDHAF4
GM12878	cDNA	chr6:70588987-70589284:+	chr6:70588615-70589569:+	414	5	0.0120773	298	0		SDHAF4
GM12878	cDNA	chr6:70588859-70589325:+	chr6:70588615-70589569:+	414	7	0.0169082	467	5	TGGCT	SDHAF4
GM12878	cDNA	chr6:170584410-170584525:-	chr6:170584299-170584669:-	136	7	0.0514706	116	0		PDCD2
GM12878	cDNA	chr6:170584410-170584581:-	chr6:170584299-170584669:-	130	6	0.0461538	172	5	CCCGC	PDCD2
GM12878	cDNA	chr14:21460346-21460977:-	chr14:21459020-21461303:-	25	9	0.36	632	5	CCTCC	RAB2B
GM12878	cDNA	chr15:50706125-50707523:-	chr15:50705476-50707874:-	7	5	0.714286	1399	5	CCACC	SPPL2A
GM12878	cDNA	chr16:28932452-28932581:+	chr16:28932346-28932612:+	198	10	0.0505051	130	8	CAGCCTGG	CD19
GM12878	cDNA	chr17:3663563-3663657:-	chr17:3662889-3663885:-	94	22	0.234043	95	5	GACCG	TAX1BP3,P2RX5-TAX1BP3
