# Supplementary material for: Direct long-read RNA sequencing identifies a subset of questionable exitrons likely arising from reverse transcription artifacts
Source: Genome Biol. 2021 Jun 28;22:190. doi: 10.1186/s13059-021-02411-1 (PMC8240250; doi:10.1186/s13059-021-02411-1)
Supplement: Supplementary file 4 — Additional file 4: Table S2. Mapping and gffcompare statistics for Oxford Nanopore Technologies (ONT) sequencing datasets used in this study. [file 13059_2021_2411_MOESM4_ESM.xlsx]

## Sheet: Legend
Table S2. Mapping and gffcompare statistics for Oxford Nanopore Technologies (ONT) sequencing datasets used in this study. Data for the five commonly used cell lines A549, HCT116, HepG2, K562 and MCF-7 as well as the B-lymphoblastoid cell line GM12878 were taken from the Singapore Nanopore Expression Project (SG-NEx) and the Nanopore RNA Consortium. dRNA, ONT direct RNA sequencing. Note that many…

## Sheet: Mapping statistics
Cell line	Source	ONT library type	Total reads	Mapped reads	Percent mapped
HCT116	SG-NEx	dRNA	7712110	4625263	59.97
HCT116	SG-NEx	cDNA	14425441	4300038	29.81
HCT116	SG-NEx	dcDNA	22279287	4444747	19.95
HepG2	SG-NEx	dRNA	13265987	8014878	60.42
HepG2	SG-NEx	cDNA	17044056	2938208	17.24
HepG2	SG-NEx	dcDNA	4514002	865668	19.18
K562	SG-NEx	dRNA	4559410	2771154	60.78
K562	SG-NEx	cDNA	26902828	5130534	19.07
K562	SG-NEx	dcDNA	5289004	877827	16.6
A549	SG-NEx	dRNA	8640460	5507446	63.74
A549	SG-NEx	cDNA	17252656	3874868	22.46
A549	SG-NEx	dcDNA	5500851	788113	14.33
MCF-7	SG-NEx	dRNA	10759939	4679574	43.49
MCF-7	SG-NEx	cDNA	16281928	2500702	15.36
MCF-7	SG-NEx	dcDNA	7612248	966309	12.69
GM12878	Nanopore RNA Consortium	dRNA	14971421	8189740	54.7
GM12878	Nanopore RNA Consortium	cDNA	25418307	4746167	18.67

## Sheet: gffcompare transcript stats
Cell line	Source	ONT library type	Matching transcripts	Matching loci	Missed exons	Novel exons	Missed introns	Novel introns	Novel loci
HCT116	SG-NEx	dRNA	15313	9714	88271/383052 (23.0%)	3497/145238 (2.4%)	44558/233000 (19.1%)	811/128768 (0.6%)	1359/16445 (8.3%)
HCT116	SG-NEx	cDNA	12070	7708	128170/363054 (35.3%)	7588/112278 (6.8%)	77275/219721 (35.2%)	2084/92611 (2.3%)	4326/20558 (21.0%)
HCT116	SG-NEx	dcDNA	15867	9632	83405/377675 (22.1%)	6649/149159 (4.5%)	40419/229682 (17.6%)	2848/133067 (2.1%)	2179/16387 (13.3%)
HepG2	SG-NEx	dRNA	16100	10209	84930/394287 (21.5%)	6008/159009 (3.8%)	42229/239986 (17.6%)	1526/140372 (1.1%)	2500/18562 (13.5%)
HepG2	SG-NEx	cDNA	10224	6946	137602/354218 (38.8%)	8910/103954 (8.6%)	86354/214322 (40.3%)	2760/81937 (3.4%)	5259/22085 (23.8%)
HepG2	SG-NEx	dcDNA	9833	7096	97294/311825 (31.2%)	2258/95273 (2.4%)	53331/186254 (28.6%)	781/82254 (0.9%)	1077/12738 (8.5%)
K562	SG-NEx	dRNA	11523	7865	117006/366709 (31.9%)	4118/118871 (3.5%)	69687/221968 (31.4%)	937/98468 (1.0%)	2350/17759 (13.2%)
K562	SG-NEx	cDNA	12069	7837	134074/377106 (35.6%)	33625/145697 (23.1%)	84134/228861 (36.8%)	5158/97282 (5.3%)	26092/46361 (56.3%)
K562	SG-NEx	dcDNA	10145	7185	99077/324580 (30.5%)	5552/105668 (5.3%)	56097/194605 (28.8%)	2250/88022 (2.6%)	2709/15349 (17.6%)
A549	SG-NEx	dRNA	15869	10105	88444/393600 (22.5%)	3988/153883 (2.6%)	43798/239801 (18.3%)	881/136112 (0.6%)	1682/17475 (9.6%)
A549	SG-NEx	cDNA	11260	7482	141068/375740 (37.5%)	11311/116470 (9.7%)	87964/228473 (38.5%)	3655/91748 (4.0%)	6561/25011 (26.2%)
A549	SG-NEx	dcDNA	8126	6121	121259/322366 (37.6%)	5581/92044 (6.1%)	72293/193782 (37.3%)	3600/77459 (4.6%)	1592/13965 (11.4%)
MCF-7	SG-NEx	dRNA	14138	9317	107515/399591 (26.9%)	5804/151104 (3.8%)	61604/243605 (25.3%)	865/122613 (0.7%)	3800/21191 (17.9%)
MCF-7	SG-NEx	cDNA	9254	6326	167911/368992 (45.5%)	19966/107102 (18.6%)	111331/223926 (49.7%)	1565/69263 (2.3%)	17616/36409 (48.4%)
MCF-7	SG-NEx	dcDNA	9031	6556	126749/336336 (37.7%)	7394/97740 (7.6%)	77630/202497 (38.3%)	3879/79996 (4.8%)	2986/16382 (18.2%)
GM12878	Nanopore RNA Consortium	dRNA	16677	10204	84726/396834 (21.4%)	7580/163598 (4.6%)	44280/241659 (18.3%)	1900/137645 (1.4%)	3306/19557 (16.9%)
GM12878	Nanopore RNA Consortium	cDNA	12546	7988	127932/365240 (35.0%)	20906/128946 (16.2%)	79243/220686 (35.9%)	4525/93559 (4.8%)	14425/32022 (45.0%)
